# Supplementary material for: Mosaic loss of Chromosome Y in aged human microglia
Source: HighWire-hosted journal article supplement (doi:10.1101/gr.276409.121), 2022-08-30
Supplement: Supplemental_Table_S1.xlsx [file Supplemental_Table_S1.xlsx]

## Sheet: Description
Supplemental Table S1:
Information on the given tabs are found below
Combined brain single-cell dataset summary	Brain_scRNAseq_summary

## Sheet: Brain_scRNAseq_summary
	Name	ID	Study	Ref	Journal (as of Aug 15th, 2022)		Tissue(s)	Disease(s)	Method	Sequencing Technology	FACS sorting	Details	Ref genome	GEX matrix processing
	Smith	GSE160936	Diverse human astrocyte and microglial transcriptional responses to Alzheimer’s pathology	Smith et al. 2022	Acta Neuropathol		Entorhinal cortex, somatosensory cortex	Control, AD	Single-nuclei	10X 3' v3	NEUNneg, OLIG2neg, DAPIpos	Glia enriched	GRCh38	Provided
	Kamath	GSE178265	Single-cell genomic profiling of human dopamine neurons identifies a population that selectively degenerates in Parkinson’s disease	Kamath et al. 2022	Nat Neurosci		Substantia nigra pars compacta	Control, PD	Single-nuclei	10X 3' v3	DAPIpos	Bulk tissue	hg19	Provided
	Morabito	GSE174367	Single-nucleus chromatin accessibility and transcriptomic characterization of Alzheimer’s Disease	Morabito et al. 2021	Nat Genet		Prefrontal cortex	Control, AD	Single-nuclei	10X 3' v3	DAPIpos	Bulk tissue	GRCh38	Local pipeline
	Gerrits	GSE148822	Distinct amyloid-b and tau associated microglia profiles in Alzheimer's disease	Gerrits et al. 2021	Acta Neuropathol		Occipital cortex, occipitotemporal cortex	Control, AD	Single-nuclei	10X 3' v3	NEUNneg, OLIG2neg, DAPIpos	Glia enriched	GRCh38	Provided
	Pineda	GSE174332	Single-cell profiling of the human primary motor cortex in ALS and FTLD	Pineda et al. 2021	bioRxiv		Primary motor cortex	Control, ALS, FTLD	Single-nuclei	10X 3' v3	NA	Bulk tissue	GRCh38	Provided
	Mancuso	GSE137444	Stem cell derived human microglia transplanted in mouse brain to study human disease	Mancuso et al. 2019	Nat Neurosci		Lateral temporal neocortex	Medial temporal lobe seizures, cancer	Single-cell	10X 3' v2	CD11bpos, CD45pos, e780neg	Microglia enriched	GRCh38	Local pipeline
	Smajic	GSE157783	Single-cell sequencing of the human midbrain reveals glial activation and a neuronal state specific to Parkinson’s disease	Smajic et al. 2022	Brain		Midbrain	Control, PD	Single-nuclei	10X 3' v3	DAPIpos	Bulk tissue	GRCh38	Provided
	Lee	GSE152058	Cell Type-Specific Transcriptomics Reveals that Mutant Huntingtin Leads to Mitochondrial RNA Release and Neuronal Innate Immune Activation	Lee et al. 2020	Neuron		Dorsal striatum	Control, HD	Single-nuclei	10X 3' v3	NA	Bulk tissue	GRCh38	Provided
	Olah	syn12514624	Single cell RNA sequencing of human microglia uncovers a subset associated with Alzheimer’s disease	Olah et al. 2020	Nat Commun		DLPFC	Control, AD, mild cognitive impairment	Single-cell	10X 3' v2	CD11bhigh, CD45intermediate, 7AADneg	Microglia enriched	GRCh38	Local pipeline
	Zhou	syn21670836	Human and mouse single-nucleus transcriptomics reveal TREM2-dependent and TREM2-independent cellular responses in Alzheimer’s disease	Zhou et al. 2020	Nat Medicine		Prefrontal cortex	Control, AD	Single-nuclei	10X 5'	NA	Bulk tissue	GRCh38	Provided
	Ahyan	GSE160189	Resolving cellular and molecular diversity along the hippocampal anterior-to-posterior axis in humans	Ahyan et al. 2021	Neuron		Hippocampus	Control	Single-nuclei	10X 3' v3	NA	Bulk tissue	hg19	Provided (acquired from authors)
	Welch	GSE126836	Single-cell multi-omic integration compares and contrasts features of brain cell identity	Welch et al. 2019	Cell		Substantia nigra pars compacta	Control	Single-nuclei	10X 3' v3	NA	Bulk tissue	GRCh38	Provided
	Yang	GSE163577	A human brain vascular atlas reveals diverse mediators of Alzheimer’s risk	Yang et al. 2022	Nature		Hippocampus, superior frontal cortex	Control, AD	Single-nuclei	10X 3' V3	NA	Vascular enriched	GRCh38	Provided
	Zhong	GSE119212	Characterization of the transcriptional landscape of human developing hippocampus by scRNA-seq	Zhong et al. 2019	Nature		Hippocampus	Control	Single-cell	10X 3' v2	NA	Bulk tissue	hg19	Provided
	Marsh	GSE157760	Dissection of artifactual and confounding glial signatures by single-cell sequencing of mouse and human brain	Marsh et al. 2022	Nat Neurosci		Brain	Control, AD	Single-nuclei	10X 3' v3	DAPIpos	Bulk tissue	GRCh38	Provided
	Sorrells	PRJNA530977	Immature excitatory neurons develop during adolescence in the human amygdala	Sorrells et al. 2019	Nat Commun		Amygdala	Control	Single-cell	10X 3' v2	NA	Bulk tissue	GRCh38	Local pipeline
	Lau	GSE157827	Single-nucleus transcriptome analysis reveals dysregulation of angiogenic endothelial cells and neuroprotective glia in Alzheimer’s disease	Lau et al. 2020	PNAS		Prefrontal cortex	Control, AD	Single-nuclei	10X 3' v3	DAPIpos	Bulk tissue	GRCh38	Provided
	Thrupp	GSE153807	Single nucleus RNA-Seq is not suitable for detection of microglial activation genes in humans	Thrupp et al. 2020	Cell Rep		Lateral temporal neocortex	Temporal lobe epilepsy, cancer	Single-nuclei	10X 3' v2	CD11bpos, CD45pos, e780neg	Microglia enriched	GRCh38	Provided
	Mathys	syn18485175	Single-cell transcriptomic analysis of Alzheimer’s disease	Mathys et al. 2019	Nature		DLPFC	Control, AD, mild cognitive impairment	Single-nuclei	10X 3' v2	NA	Bulk tissue	GRCh38	Local pipeline
	Nagy	GSE144136	Single-nucleus transcriptomics of the prefrontal cortex in major depressive disorder implicates oligodendrocyte precursor cells and excitatory neurons	Nagy et al. 2021	Nat Commun		DLPFC	Control, MDD	Single-nuclei	10X 3' v2	NA	Bulk tissue	GRCh38	Local pipeline
	Patel	syn25879216	Transcriptional landscape of human microglia implicates age, sex, and APOE-related immunometabolic pathway perturbations	Patel et al. 2022	Aging Cell		Frontal lobe, Temporal lobe	Temporal lobe epilepsy, cancer	Single-cell	10X 3' v2	CD11bpos, CD45pos	Microglia enriched	GRCh38	Local pipeline
	Garcia	GSE173731	Single-cell dissection of the human brain vasculature	Garcia et al. 2022	Nature		Caudate, putamen, cortex	HD, epilepsy, various developmental disorders, cancer	Single-nuclei	10X 3' v3	NA	Bulk tissue	GRCh38	Provided
	Agarwal	GSE140231	A single-cell atlas of the human substantia nigra reveals cell-specific pathways associated with neurological disorders	Agarwal et al. 2020	Nature Communications		Cortex, Substantia nigra	Control	Single-nuclei	10X 3' v3	NA	Bulk tissue	GRCh38	Provided
	Sadick	GSE167494	Astrocytes and oligodendrocytes undergo subtype-specific transcriptional changes in Alzheimer’s disease	Sadick et al. 2022	Neuron		Prefrontal cortex	Control, AD	Single-nuclei	10X 3' v3	DAPIpos, SOX10pos	Bulk tissue, astrocyte enriched	GRCh38	Provided
	Hardwick	GSE178175	Single-nuclei isoform RNA sequencing unlocks barcoded exon connectivity in frozen brain tissue	Hardwick et al. 2022	Nature Biotech		Mid-frontal cortex	Control	Single-nuclei	10X 3' v3	NA	Bulk tissue	GRCh38	Provided
	Kihara	GSE179590	Single-Nucleus RNA-seq of Normal-Appearing Brain Regions in Relapsing-Remitting vs. Secondary Progressive Multiple Sclerosis: Implications for the Efficacy of Fingolimod	Kihara et al. 2022	Front. Cell. Neurosci.		Prefrontal cortex	MS	Single-nuclei	10X 3' v3	DAPIpos	Bulk tissue	GRCh38	Provided
	Sayed	GSE183068	AD-linked R47H- TREM2 mutation induces disease-enhancing microglial states via AKT hyperactivation	Sayed et al. 2021	Sci Transl Med		Mid-frontal cortex	Control, AD	Single-nuclei	10X 3' v3	NA	Bulk tissue	GRCh38	Provided
	Franjic	GSE186538	Transcriptomic taxonomy and neurogenic trajectories of adult human, macaque, and pig hippocampal and entorhinal cells	Franjic et al. 2022	Neuron		Entorhinal cortex, hippocampus	Control	Single-nuclei	10X 3' v3	NA	Bulk tissue	GRCh38	Provided
	Fullard	GSE164485	Single-nucleus transcriptome analysis of human brain immune response in patients with severe COVID-19	Fullard et al. 2021	Genome Med		DLPFC, Medulla oblongata, Choroid plexus	Control, Severe COVID-19	Single-nuclei	10X 3' v3	NA	Bulk tissue	GRCh38	Provided
	Kuo	GSE189202	Mutant glucocerebrosidase impairs α-synuclein degradation by blockade of chaperone-mediated autophagy	Kuo et al. 2022	Sci Advances		Anterior cingulate gyrus	Control, PD	Single-nuclei	10X 3' v3	NA	Bulk tissue	GRCh38	Provided
