# Supplementary material for: Mosaic loss of Chromosome Y in aged human microglia
Source: HighWire-hosted journal article supplement (doi:10.1101/gr.276409.121), 2022-08-30
Supplement: Supplemental_Table_S2.xlsx [file Supplemental_Table_S2.xlsx]

## Sheet: Description
Supplemental Table S2:
Information on the given tabs are found below
Donor/cell-type LOY across all donors and cell-types	Donor celltype LOY summary

## Sheet: Donor celltype LOY summary
cell_type	Diagnosis	donor_organism.age	cohort	sample	LOY_percent	Adjusted LOY percent	MSY_sparsity_score	TOTAL cells	LOY cells	NORMAL cells	neuro_degen_type_specific	median_nUMI_LOY	median_nUMI_NORMAL	median_nFeature_LOY	median_nFeature_NORMAL	expr_Y	expr_PAR	expr_PAR_LOY	PAR_UMI	PAR_genes	PAR_score_module	PAR_score_LOY	Y_UMI	Y_genes	Y_score	sequencing_method2	tissue	specific_tissue	sequencing_method	donor_organism.sex	Raw MSY sparsity score	Raw PAR sparsity score	neuro_degen_diagnosis	expr_Y_scaled	nUMI_threshold	nFeature_threshold	ID
Microglia	AD	83	GSE160936	A163_17	57.3386	56.4247	0.366645	2262	1297	965	AD	6313	6618	2829	2928	2.98152	2.16982	1.66884	5.4943	3.28912	0.0293145	-0.035277	12.2995	4.9772	0.00844436	single-nuclei	Brain	SSC EC	10X 3' v3	male	519.482	328.912	AD	0.881489	3000	1000	A163_17_GSE160936_cleaned_filtered
Microglia	AD	76	GSE183068	GSM5550475	45.9807	43.9131	-0.477372	311	143	168	AD/TLBD	5813	5768	2367	2310.5	2.84767	2.16933	1.69696	5.09524	4.03571	0.0902687	0.0200824	10.0417	4.03571	0.0125425	single-nuclei	Brain	PFC	10X 3' v3	male	405.357	277.381	AD	0.410465	3000	1000	GSM5550475_GSE183068_cleaned_filtered
Microglia	AD	80	GSE167494	GSM5106120	45.9854	43.1143	-0.816811	137	63	74	AD	5332	5498	2704	2648	2.57813	1.95466	1.4549	3.67568	3.55405	0.0441279	-0.014456	8.13514	3.55405	0.00776967	single-nuclei	Brain	DLPFC	10X 3' v3	male	359.459	252.703	AD	-0.53802	3000	1000	GSM5106120_GSE167494_cleaned_filtered
Microglia	AD	87	GSE160936	A096_14	43.5955	42.418	0.104708	445	194	251	AD	4497.5	4578	2171	2187	3.14709	2.27168	1.69505	4.45817	2.73307	0.0494197	-0.0265461	11.3147	4.7251	0.0230524	single-nuclei	Brain	SSC EC	10X 3' v3	male	484.064	273.307	AD	1.4641	3000	1000	A096_14_GSE160936_cleaned_filtered
Microglia	AD	80	GSE183068	GSM5550481	42.132	39.456	-0.744048	197	83	114	AD	3809	3855	2038	2047	3.00305	2.11553	1.88567	3.46491	3.59649	0.076781	0.0294741	7.60526	3.59649	0.0216658	single-nuclei	Brain	PFC	10X 3' v3	male	369.298	239.474	AD	0.957242	3000	1000	GSM5550481_GSE183068_cleaned_filtered
Microglia	Non-degenerative	90	GSE167494	GSM5106119	38.3838	36.1455	-0.559424	198	76	122	Non-symptomatic	4126.5	4543	2176.5	2330.5	2.77126	2.10207	1.79364	3.5	3.87705	0.0705966	0.00742897	7.18033	3.87705	0.0447799	single-nuclei	Brain	DLPFC	10X 3' v3	male	394.262	255.738	Control	0.141584	3000	1000	GSM5106119_GSE167494_cleaned_filtered
OPC	AD	79	GSE183068	GSM5550480	30.5556	29.9957	0.873375	288	88	200	AD/CAA	9827.5	12594.5	3161.5	3628.5	3.21492	1.31848	0.831662	3.895	5.825	-1.06025e-05	-0.0434771	31.46	5.825	0.0257786	single-nuclei	Brain	PFC	10X 3' v3	male	588	239.5	AD	1.70281	3000	1000	GSM5550480_GSE183068_cleaned_filtered
OPC	HD	65	GSE152058	3881	28.6111	27.0982	-0.154407	360	103	257	HD	8760	7125	2968	2587	2.90696	1.23605	0.83433	2.19844	1.43191	-0.0107571	-0.0437881	13.4708	3.98833	0.112435	single-nuclei	Brain	Putamen Caudate	10X 3' v3	male	449.027	143.191	HD	0.619097	3000	1000	3881_GSE152058_cleaned_filtered
Microglia	Non-degenerative	96	syn12514624	Microglia_MO_MCI3	28.4035	22.1236	-1.62601	1616	459	1157	None	3868	4174	1874	1940	2.02709	2.7301	2.10491	6.55575	3.46759	0.0128382	-0.0796461	3.24719	2.42264	0.10884	3'	Brain	DLPFC	10X 3' v2	male	250.043	346.759	MCI	-2.47711	3000	1000	Microglia_MO_MCI3_syn12514624_cleaned_filtered
Microglia	Non-degenerative	72	GSE183068	GSM5550501	23.9344	21.8832	-0.469175	305	73	232	Normal	5344	5629.5	2456	2492.5	2.76512	1.96878	1.53194	4.01293	4.02155	0.0527647	-0.0114417	8.83621	4.02155	0.00994181	single-nuclei	Brain	PFC	10X 3' v3	male	406.466	261.638	Control	0.119995	3000	1000	GSM5550501_GSE183068_cleaned_filtered
Microglia	AD	83	GSE183068	GSM5550451	21.875	18.5856	-0.957438	288	63	225	AD	3651	3926	1990	2038	2.80432	2.3482	1.69951	4.20889	3.38222	0.114591	0.0193286	6.86667	3.38222	0.0067204	single-nuclei	Brain	PFC	10X 3' v3	male	340.444	276.444	AD	0.257934	3000	1000	GSM5550451_GSE183068_cleaned_filtered
Microglia	Non-degenerative	79	GSE174367	GSM5292856	18.5185	16.3602	-0.521793	189	35	154	Control	3529	3305.5	1917	1813	3.04132	2.62008	1.24796	4.65584	2.72727	0.126809	-0.0139991	7.26623	3.92208	0.147209	single-nuclei	Brain	Frontal cortex	10X 3' v3	male	399.351	272.727	Control	1.09189	3000	1000	GSM5292856_GSE174367_cleaned_filtered
Microglia	Non-degenerative	94	GSE167494	GSM5106101	17.3913	15.9647	-0.0936923	184	32	152	Non-symptomatic	4400.5	4781	2412.5	2557.5	2.86134	2.41164	1.91463	5.36184	4.40132	0.093254	0.0228438	8.57895	4.40132	0.122203	single-nuclei	Brain	DLPFC	10X 3' v3	male	457.237	303.289	Control	0.458561	3000	1000	GSM5106101_GSE167494_cleaned_filtered
Neuron	AD	68	GSE167494	GSM5106107	15.6863	15.3944	1.54689	102	16	86	AD	9291	14170.5	3495.5	5154	2.99502	1.34069	0.842768	4.9186	6.62791	-0.034465	-0.054115	27.0814	6.62791	0.142428	single-nuclei	Brain	DLPFC	10X 3' v3	male	679.07	327.907	AD	0.928986	3000	1000	GSM5106107_GSE167494_cleaned_filtered
OPC	AD	65	GSE183068	GSM5550455	15.0442	14.2873	0.561529	113	17	96	AD/CAA	12187	11363	3681	3642	3.06949	1.43893	0.975445	3.88542	5.35417	0.0083758	-0.0284151	23.8438	5.35417	0.00493658	single-nuclei	Brain	PFC	10X 3' v3	male	545.833	258.333	AD	1.19104	3000	1000	GSM5550455_GSE183068_cleaned_filtered
OPC	ALS	60	GSE174332	191112_ALS_117_snRNA-C3	13.5135	11.9212	-0.207302	185	25	160	ALS	3489	3598.5	1821	1974.5	3.20046	1.14124	0	0.9	0.8	-0.0248673	-0.0450222	9.3375	3.8875	0.0393339	single-nuclei	Brain	Motor cortex	10X 3' v3	male	441.875	80	ALS	1.65192	3000	1000	191112_ALS_117_snRNA-C3_GSE174332_cleaned_filtered
Microglia	AD	78	GSE183068	GSM5550491	13	11.5581	-0.10471	400	52	348	AD	7273.5	7012.5	3050	2978.5	2.67041	2.20132	1.56064	5.98563	4.46839	0.0821876	-0.0172074	10.3075	4.46839	0.00192571	single-nuclei	Brain	PFC	10X 3' v3	male	455.747	338.218	AD	-0.213315	3000	1000	GSM5550491_GSE183068_cleaned_filtered
Microglia	AD	77	GSE183068	GSM5550495	13.5071	11.2152	-0.583855	422	57	365	AD	4639	4764	2239	2234	2.85861	2.3647	1.87282	4.93151	3.86849	0.1096	0.0336544	8.29041	3.86849	0.0164607	single-nuclei	Brain	PFC	10X 3' v3	male	390.959	289.589	AD	0.448956	3000	1000	GSM5550495_GSE183068_cleaned_filtered
OPC	Non-degenerative	78	GSE157827	NC17	11.9231	10.1195	-0.336139	260	31	229	None	4071	4029	2156	2176	3.22242	1.28435	0	1.24454	1.0917	-0.00173058	-0.0358104	11.1266	4.22707	0.111165	single-nuclei	Brain	Prefrontal cortex	10X 3' v3	male	424.454	109.17	Control	1.72917	3000	1000	NC17_GSE157827_cleaned_filtered
Microglia	AD	79	GSE160936	A277_12	10.4112	9.85936	0.888209	1921	200	1721	AD	4726	5124	2399	2543	3.29088	2.22545	1.59376	4.76816	3.03893	0.0433732	-0.0378589	14.3167	5.75596	0.0352528	single-nuclei	Brain	SSC EC	10X 3' v3	male	590.006	303.893	AD	1.9701	3000	1000	A277_12_GSE160936_cleaned_filtered
OPC	HD	65	GSE173731	3881	10.177	9.45127	0.605094	226	23	203	HD	8376	9309	3096	3086	3.14684	1.36082	0.983965	3.15764	5.4532	0.00990219	-0.0209466	22.5025	5.4532	0.116017	single-nuclei	Brain	Caudate Putamen	10X 3' v3	male	551.724	191.626	HD	1.46323	3000	1000	3881_GSE173731_cleaned_filtered
OPC	Non-degenerative	67	GSE152058	4494	9.43396	8.50602	0.350961	318	30	288	Control	5572.5	7486	2240	2701.5	3.0251	1.19854	0	2.30556	1.5	-0.0129692	-0.0422288	17.3993	4.57639	0.148579	single-nuclei	Brain	Caudate Putamen	10X 3' v3	male	517.361	150	Control	1.03482	3000	1000	4494_GSE152058_cleaned_filtered
OPC	AD	79	GSE160936	A277_12	8.46561	8.1286	1.39816	189	16	173	AD	4920	6291	2452.5	2852	3.21926	1.43011	0.624823	2.18497	1.68786	-0.064289	-0.0897951	16.6127	5.83815	0.0419851	single-nuclei	Brain	SSC EC	10X 3' v3	male	658.96	168.786	AD	1.71807	3000	1000	A277_12_GSE160936_cleaned_filtered
OPC	HD	53	GSE152058	4254	9.90991	7.80716	-0.494804	111	11	100	HD	5590	5081	2207	2263.5	2.96015	1.47109	0.985962	2.1	1.58	0.0106844	-0.0361147	10.71	3.72	0.115645	single-nuclei	Brain	Caudate Putamen	10X 3' v3	male	403	158	HD	0.806288	3000	1000	4254_GSE152058_cleaned_filtered
Microglia	Non-degenerative	75	GSE183068	GSM5550503	8.31569	7.7264	0.820406	3307	275	3032	Normal	8966	8387.5	3292	3111	3.11254	2.66449	2.12911	12.093	5.69459	0.167328	0.0572838	19.126	5.69459	0.0544113	single-nuclei	Brain	PFC	10X 3' v3	male	580.838	447.131	Control	1.34253	3000	1000	GSM5550503_GSE183068_cleaned_filtered
Astrocyte	MS	43	GSE179590	S1	8.74317	6.75422	-0.437278	183	16	167	MS	4261	7789	2031.5	3344	2.17947	1.75472	1.9899	5.22754	4.03593	0.0261073	0.0561404	8.31138	4.03593	0.042519	single-nuclei	Brain	DLPFC	10X 3' v3	male	410.778	275.449	MS	-1.9409	3000	1000	S1_GSE179590_cleaned_filtered
Microglia	PD	82	GSE178265	pPDsHSrSNxi1963	8.34492	6.56823	-0.320599	719	60	659	PD	5150	5530	2549.5	2667	2.77494	2.00918	1.55732	3.9742	2.65706	0.0282792	-0.0162298	8.67071	4.20941	0.0313621	single-nuclei	Brain	Substantia nigra pars compacta	10X 3' v3	male	426.555	265.706	PD	0.154519	3000	1000	pPDsHSrSNxi1963_GSE178265_cleaned_filtered
Fibroblast	Non-degenerative	NA	GSE164485	NPBB138	7.33945	6.37441	0.310433	109	8	101	Control	4764	5843	2273.5	2533	2.9243	1.69878	1.32924	3.30693	2.27723	0.0378615	-0.01567	11.7327	5.0297	0.218873	single-nuclei	Brain	Brain	10X 3' v3	male	511.881	227.723	Control	0.680116	3000	1000	NPBB138_GSE164485_cleaned_filtered
Microglia	AD	81	GSE174367	GSM5292843	7.85388	6.22215	-0.232603	1095	86	1009	AD	3941	3985	2089	2105	3.00128	1.95116	1.45996	2.6997	1.99009	0.0365662	0.0073135	8.38553	4.33201	0.146995	single-nuclei	Brain	Frontal cortex	10X 3' v3	male	438.454	199.009	AD	0.951022	3000	1000	GSM5292843_GSE174367_cleaned_filtered
Fibroblast	Non-degenerative	NA	GSE164485	NPBB131	7.07547	6.14685	0.350205	212	15	197	Control	7366	6387	2864	2686	2.90299	1.73282	1.31243	3.35025	2.30457	0.0305798	-0.0125771	12.8883	5.07614	0.20929	single-nuclei	Brain	Brain	10X 3' v3	male	517.259	230.457	Control	0.60515	3000	1000	NPBB131_GSE164485_cleaned_filtered
Microglia	Non-degenerative	81	GSE160936	A297_16	6.89655	5.93532	0.314521	406	28	378	Non-disease control	3835	4044.5	1988	2020	3.17287	2.02804	1.25986	3.1746	2.20106	0.0187908	-0.0626235	11.127	4.99206	0.0315182	single-nuclei	Brain	SSC EC	10X 3' v3	male	512.434	220.106	Control	1.55482	3000	1000	A297_16_GSE160936_cleaned_filtered
OPC	Non-degenerative	70	GSE173731	4308	6.8915	5.92052	0.304091	682	47	635	Leukemia	6018	6226	2531	2598	3.30493	1.02142	0.686514	1.4315	5.05512	-0.0149326	-0.0362873	17.4457	5.05512	0.15146	single-nuclei	Brain	Caudate Putamen	10X 3' v3	male	511.024	113.228	Leukemia	2.01955	3000	1000	4308_GSE173731_cleaned_filtered
OPC	Non-degenerative	70	GSE152058	4308	7.02403	5.80765	0.0711254	541	38	503	Control	7346.5	6817	2835	2666	3.13975	1.12334	0.879037	1.75149	1.31412	-0.0252259	-0.0513776	16.2584	4.3161	0.142913	single-nuclei	Brain	Caudate Putamen	10X 3' v3	male	479.523	131.412	Control	1.43829	3000	1000	4308_GSE152058_cleaned_filtered
Pericyte	Non-degenerative	80	GSE173731	4294	8.25688	5.7603	-0.672298	109	9	100	Pancreatic cancer	3496	4405.5	1885	2211.5	2.79861	1.46183	0	2	3.72	-0.000302754	-0.0203734	8.01	3.72	0.0590733	single-nuclei	Brain	Caudate Putamen	10X 3' v3	male	379	150	Pancreatic cancer	0.237819	3000	1000	4294_GSE173731_cleaned_filtered
OPC	PD	79	GSE157783	IPD5	6.52174	5.55953	0.313474	322	21	301	IPD	8133	7782	3297	3128	2.91865	1.26861	0.686171	2.33223	1.79402	-0.0208411	-0.064827	14.8505	5.0897	0.0939786	single-nuclei	Brain	Midbrain	10X 3' v3	male	512.292	179.402	PD	0.660228	3000	1000	IPD5_GSE157783_cleaned_filtered
Pericyte	Non-degenerative	NA	GSE164485	NPBB139	7.69231	5.50518	-0.53548	130	10	120	Control	9387.5	7076	2927.5	2460.5	2.59333	1.45301	1.59369	2.71667	1.94167	0.0143091	0.0182949	9.74167	3.95	0.134876	single-nuclei	Brain	Brain	10X 3' v3	male	397.5	194.167	Control	-0.484527	3000	1000	NPBB139_GSE164485_cleaned_filtered
Fibroblast	Non-degenerative	78	GSE148822	Donor8	7.75681	5.45289	-0.589266	477	37	440	None	3441	3665.5	1939	1989	2.86985	1.81376	1.44839	2.24318	1.73182	-0.0455533	-0.0720606	6.85455	3.75227	0.127416	single-nuclei	Brain	occipital cortex occipitotemporal cortex	10X 3' v3	male	390.227	173.182	Control	0.48852	3000	1000	Donor8_GSE148822_cleaned_filtered
Pericyte	PD	79	GSE157783	IPD5	8.4507	5.41223	-0.875391	142	12	130	IPD	6440	6212.5	2743	2765	2.32462	1.81854	1.59837	3.9	2.57692	0.0178397	-0.0177598	6.70769	3.50769	-0.00216311	single-nuclei	Brain	Midbrain	10X 3' v3	male	351.538	257.692	PD	-1.43011	3000	1000	IPD5_GSE157783_cleaned_filtered
Fibroblast	Non-degenerative	NA	GSE164485	NPBB052	6.79612	5.34867	-0.108694	206	14	192	Control	3961.5	5737.5	1969.5	2410.5	2.80805	1.48919	1.3514	2.82292	1.81771	0.0139648	0.0115484	10.7969	4.48958	0.179165	single-nuclei	Brain	Brain	10X 3' v3	male	455.208	181.771	Control	0.271032	3000	1000	NPBB052_GSE164485_cleaned_filtered
Fibroblast	AD	75	GSE148822	Donor18	7.97101	5.34713	-0.723717	276	22	254	AD	3502.5	3450	1862	1813	2.85571	1.4719	1.39307	1.76772	1.5315	-0.0438553	-0.0640376	6.33465	3.63386	0.126612	single-nuclei	Brain	occipital cortex occipitotemporal cortex	10X 3' v3	male	372.047	153.15	AD	0.438773	3000	1000	Donor18_GSE148822_cleaned_filtered
OPC	Non-degenerative	79	GSE178265	pPDCN3898	6.25	4.86305	-0.0645565	272	17	255	Control	5009	5203	2309	2370	3.19987	1.1578	0	1.43529	1.13725	-0.0134803	-0.0429433	13.2627	4.54118	0.0747183	single-nuclei	Brain	Caudate nucleus	10X 3' v3	male	461.176	113.725	Control	1.64985	3000	1000	pPDCN3898_GSE178265_cleaned_filtered
OPC	Non-degenerative	90	GSE167494	GSM5106099	5.49451	4.77986	0.621008	273	15	258	Non-symptomatic	8449	8759.5	3747	3793	3.11181	1.41153	0.810028	2.98062	5.36822	-0.0149933	-0.0704246	19.0155	5.36822	0.154653	single-nuclei	Brain	DLPFC	10X 3' v3	male	553.876	224.419	Control	1.33995	3000	1000	GSM5106099_GSE167494_cleaned_filtered
Fibroblast	AD	79	GSE160936	A277_12	5.17241	4.67827	1.00246	116	6	110	AD	6243.5	5793	2757.5	2578.5	3.13131	1.81833	1.11224	3.49091	2.3	-0.0156084	-0.0842183	13.8273	5.87273	0.0332823	single-nuclei	Brain	SSC EC	10X 3' v3	male	605.455	230	AD	1.40859	3000	1000	A277_12_GSE160936_cleaned_filtered
Oligodendrocyte	Non-degenerative	79	GSE178265	pPDCN3898	6.13027	4.67749	-0.112499	261	16	245	Control	5004.5	5187	2307.5	2344	3.20178	1.13438	0	1.37143	1.10204	-0.0141919	-0.0413553	13.1551	4.48163	0.0744104	single-nuclei	Brain	Caudate nucleus	10X 3' v3	male	454.694	110.204	Control	1.65654	3000	1000	pPDCN3898_GSE178265_cleaned_filtered
Astrocyte	Non-degenerative	83	GSE174367	GSM5292851	7.09459	4.63508	-0.656834	296	21	275	Control	3439	4892	1801	2354	2.44511	1.71671	1.42902	3.51636	2.36	0.0283732	-0.00972636	7.25455	3.76	0.0613131	single-nuclei	Brain	Frontal cortex	10X 3' v3	male	381.091	236	Control	-1.00611	3000	1000	GSM5292851_GSE174367_cleaned_filtered
Fibroblast	Non-degenerative	NA	GSE164485	NPBB139	5.72917	4.62314	0.169448	192	11	181	Control	6643	6712	2788	2827	2.76774	1.74656	1.73753	3.9558	2.37017	0.0293937	-0.00126136	11.4033	4.8453	0.169079	single-nuclei	Brain	Brain	10X 3' v3	male	492.818	237.017	Control	0.129194	3000	1000	NPBB139_GSE164485_cleaned_filtered
Microglia	Non-degenerative	83	GSE174367	GSM5292851	7.2	4.58299	-0.721006	125	9	116	Control	3455	3645.5	1835	1969	2.92946	2.33154	2.2616	3.57759	2.17241	0.0811592	0.0559025	7.05172	3.72414	0.119191	single-nuclei	Brain	Frontal cortex	10X 3' v3	male	372.414	217.241	Control	0.698296	3000	1000	GSM5292851_GSE174367_cleaned_filtered
OPC	Non-degenerative	80	GSE173731	4294	5.17711	4.53295	0.728354	367	19	348	Pancreatic cancer	6758	8062	2878	3238	3.1083	1.30739	0.869699	2.46839	5.5546	-0.00432958	-0.046534	19.1494	5.5546	0.13169	single-nuclei	Brain	Caudate Putamen	10X 3' v3	male	568.391	180.172	Pancreatic cancer	1.32762	3000	1000	4294_GSE173731_cleaned_filtered
Microglia	Other dementias	74	GSE178265	pPDsHSrSNxi2569	7.36842	4.52463	-0.806931	190	14	176	LBD	3491.5	3510.5	1968	1973	2.82141	2.41559	2.19533	4.10227	2.46591	0.0637941	0.036644	6.39205	3.52841	0.0412382	single-nuclei	Brain	Substantia nigra pars compacta	10X 3' v3	male	360.795	246.591	LBD/FTLD	0.318052	3000	1000	pPDsHSrSNxi2569_GSE178265_cleaned_filtered
OPC	Non-degenerative	90	GSE167494	GSM5106098	5.24862	4.48975	0.558923	362	19	343	Non-symptomatic	6118	7678	3244	3463	3.12147	1.43789	0.974108	2.80466	5.34111	-0.0106488	-0.0479964	17.172	5.34111	0.160625	single-nuclei	Brain	DLPFC	10X 3' v3	male	545.481	213.12	Control	1.37397	3000	1000	GSM5106098_GSE167494_cleaned_filtered
Oligodendrocyte	HD	65	GSE152058	3881	9.50394	4.47489	-1.39635	2157	205	1952	HD	4047	4527.5	1885	1995	2.2804	1.34236	1.04978	1.7874	1.32377	0.0101237	-0.0184701	5.23617	2.69518	0.0281135	single-nuclei	Brain	Putamen Caudate	10X 3' v3	male	281.096	132.377	HD	-1.58572	3000	1000	3881_GSE152058_cleaned_filtered
OPC	AD	86	GSE174367	GSM5292842	5.34591	4.45628	0.394555	636	34	602	AD	8756	7132.5	3280.5	2899	3.19246	1.39876	1.01008	2.50831	1.74917	-0.00489585	-0.0528325	17.0282	5.18106	0.16597	single-nuclei	Brain	Frontal cortex	10X 3' v3	male	523.256	174.917	AD	1.62375	3000	1000	GSM5292842_GSE174367_cleaned_filtered
Pericyte	PD	75	GSE178265	pPDsHSrSNxi4775	5.71429	4.06989	-0.240591	105	6	99	PD	6380	8057	2997	3632	2.19262	2.24332	1.23743	7.50505	3.87879	0.0445222	-0.0288714	6.93939	4.33333	-0.0198565	single-nuclei	Brain	Substantia nigra pars compacta	10X 3' v3	male	437.374	387.879	PD	-1.89463	3000	1000	pPDsHSrSNxi4775_GSE178265_cleaned_filtered
Microglia	AD	80	GSE174367	GSM5292844	6.14152	4.05986	-0.484379	749	46	703	AD	3712.5	3980	1873	2002	2.94563	2.0338	1.31454	3.3101	2.12091	0.0591179	-0.0113739	8.49644	4.02276	0.132323	single-nuclei	Brain	Frontal cortex	10X 3' v3	male	404.41	212.091	AD	0.755185	3000	1000	GSM5292844_GSE174367_cleaned_filtered
OPC	Non-degenerative	79	GSE174367	GSM5292838	5.48885	3.96585	-0.161306	583	32	551	Control	4220.5	4425	2062.5	2179	3.27907	1.22253	0.524707	1.23956	1.12341	-0.0200417	-0.0437548	12.216	4.4265	0.169647	single-nuclei	Brain	Frontal cortex	10X 3' v3	male	448.094	112.341	Control	1.92852	3000	1000	GSM5292838_GSE174367_cleaned_filtered
OPC	AD	81	GSE174367	GSM5292843	5.3135	3.95183	-0.0455342	941	50	891	AD	5547	5240	2254.5	2355	3.20752	1.23623	0	1.59596	1.29181	-0.0134119	-0.0650411	12.9562	4.57688	0.158672	single-nuclei	Brain	Frontal cortex	10X 3' v3	male	463.749	129.181	AD	1.67676	3000	1000	GSM5292843_GSE174367_cleaned_filtered
Microglia	Non-degenerative	79	GSE178265	pPDsHSrSNxi3298	5.40541	3.93688	-0.123645	481	26	455	Control	6988	5422	2878.5	2527	2.85897	2.48848	1.94348	6.98681	3.27473	0.0762277	0.0273469	10.4242	4.48352	0.0456312	single-nuclei	Brain	Substantia nigra pars compacta	10X 3' v3	male	453.187	327.473	Control	0.450222	3000	1000	pPDsHSrSNxi3298_GSE178265_cleaned_filtered
Microglia	AD	88	GSE183068	GSM5550472	5.91133	3.69762	-0.547967	203	12	191	AD	4396	5123	2272.5	2506	2.66433	2.16973	1.49649	4.25131	3.92147	0.0667617	-0.0161024	7.53927	3.92147	-0.000952703	single-nuclei	Brain	PFC	10X 3' v3	male	395.812	275.916	AD	-0.23471	3000	1000	GSM5550472_GSE183068_cleaned_filtered
OPC	HD	72	GSE173731	2030	4.36364	3.63587	0.602185	275	12	263	HD	7424	7148	2816	2819	3.28348	1.13524	0.326771	2.11407	5.39924	-0.00468307	-0.0521476	21.6122	5.39924	0.167217	single-nuclei	Brain	Caudate Putamen	10X 3' v3	male	551.331	161.597	HD	1.94407	3000	1000	2030_GSE173731_cleaned_filtered
Microglia	AD	89	syn12514624	Microglia_MO_AD71	9.538	3.49931	-1.58551	671	64	607	AD	3706.5	4044	1841	1890	2.16705	2.79298	2.58518	6.771	3.53707	0.0297546	-0.0213941	3.42504	2.43987	0.11833	3'	Brain	DLPFC	10X 3' v2	male	255.519	353.707	AD	-1.98461	3000	1000	Microglia_MO_AD71_syn12514624_cleaned_filtered
Pericyte	Non-degenerative	NA	GSE164485	NPBB131	5.55556	3.4317	-0.505126	198	11	187	Control	6054	5497	2281	2214	2.65764	1.44277	1.38345	2.4385	1.63102	0.016454	-0.0032882	8.30481	3.95722	0.152786	single-nuclei	Brain	Brain	10X 3' v3	male	401.604	163.102	Control	-0.258235	3000	1000	NPBB131_GSE164485_cleaned_filtered
Microglia	AD	78	GSE183068	GSM5550490	4.50161	3.35027	0.127942	311	14	297	AD	6747	6770	2797.5	2799	2.96436	2.50973	1.95539	8.25589	4.77441	0.125841	0.0694797	13.1886	4.77441	0.0295535	single-nuclei	Brain	PFC	10X 3' v3	male	487.205	351.178	AD	0.821103	3000	1000	GSM5550490_GSE183068_cleaned_filtered
Microglia	Non-degenerative	18	GSE173731	E379	7.19424	3.26239	-1.14189	139	10	129	Epilepsy, developmental malformation	3393.5	3672	1852	1935	2.36383	3.21964	3.35564	10.0465	2.94574	0.207312	0.210911	4.63566	2.94574	0.02184	single-nuclei	Brain	Temporal lobe	10X 3' v3	male	315.504	346.512	Epilepsy, developmental malformation	-1.29214	3000	1000	E379_GSE173731_cleaned_filtered
Neuron	Non-degenerative	8	PRJNA530977	4231_AMY	3.97112	3.22243	0.572881	277	11	266	Control	3796	8483.5	2028	3427.5	2.89762	1.35492	1.27853	3.22932	2.01504	-0.00938617	-0.0307225	18.1429	5.35714	0.040544	single-nuclei	Brain	Amygdala	10X 3' v2	male	547.368	201.504	Control	0.586225	3000	1000	4231_AMY_PRJNA530977_cleaned_filtered
Oligodendrocyte	PD	82	GSE178265	pPDsHSrSNxi1963	4.25868	3.21543	0.229876	634	27	607	PD	8733	8533	3580	3485	2.88382	1.24832	0.726488	2.27512	1.81219	-0.0216459	-0.0493485	14.2768	4.94234	0.0336998	single-nuclei	Brain	Substantia nigra pars compacta	10X 3' v3	male	500.988	181.219	PD	0.537663	3000	1000	pPDsHSrSNxi1963_GSE178265_cleaned_filtered
OPC	PD	82	GSE178265	pPDsHSrSNxi1963	4.25197	3.20872	0.229864	635	27	608	PD	8733	8542	3580	3489	2.88399	1.24989	0.726488	2.28783	1.81743	-0.0214508	-0.0493485	14.3174	4.94243	0.0337917	single-nuclei	Brain	Substantia nigra pars compacta	10X 3' v3	male	500.987	181.743	PD	0.538287	3000	1000	pPDsHSrSNxi1963_GSE178265_cleaned_filtered
OPC	Other dementias	71	GSE174332	191113_FTLD_217_snRNA-D11	5.03597	3.03374	-0.444156	139	7	132	FTLD	3197	3998.5	1826	2180	3.0408	1.23209	1.31203	1.23485	1.0303	-0.0158529	-0.0268866	9.02273	3.76515	0.0305576	single-nuclei	Brain	Motor cortex	10X 3' v3	male	409.848	103.03	LBD/FTLD	1.09008	3000	1000	191113_FTLD_217_snRNA-D11_GSE174332_cleaned_filtered
Neuron	AD	86	GSE167494	GSM5106106	3.48837	3.02103	1.06014	172	6	166	AD	3547	13109.5	1871.5	4682.5	2.92766	1.32531	0	3.90964	6.03012	-0.0437507	-0.0955218	25.3133	6.03012	0.133996	single-nuclei	Brain	DLPFC	10X 3' v3	male	613.253	251.205	AD	0.691957	3000	1000	GSM5106106_GSE167494_cleaned_filtered
Microglia	AD	86	GSE174367	GSM5292842	4.42478	3.00933	-0.0855831	791	35	756	AD	4224	4138	1966	2053.5	3.17184	2.15476	1.32082	3.54762	2.30026	0.0651284	-0.000339994	9.91667	4.53307	0.175646	single-nuclei	Brain	Frontal cortex	10X 3' v3	male	458.333	230.026	AD	1.5512	3000	1000	GSM5292842_GSE174367_cleaned_filtered
OPC	HD	72	GSE152058	2030	3.94737	3.00223	0.331979	380	15	365	HD	5728	6730	2355	2694	3.15328	1.20213	0	1.89041	1.4137	-0.0204881	-0.0649905	16.926	4.58082	0.165059	single-nuclei	Brain	Caudate Putamen	10X 3' v3	male	514.795	141.37	HD	1.4859	3000	1000	2030_GSE152058_cleaned_filtered
Oligodendrocyte	HD	65	GSE173731	3881	6.65499	2.78264	-1.12612	571	38	533	HD	4116.5	4573	1955	2029	2.41041	1.39727	1.16364	2.1182	3.14447	0.0218301	0.00308905	6.48593	3.14447	-0.0477667	single-nuclei	Brain	Caudate Putamen	10X 3' v3	male	317.636	152.345	HD	-1.12821	3000	1000	3881_GSE173731_cleaned_filtered
Microglia	AD	79	GSE183068	GSM5550476	4.40529	2.77115	-0.234119	227	10	217	AD/TLBD	4021.5	4712	2159.5	2338	2.83788	2.32425	1.63898	5.03226	4.34101	0.111026	0.0440069	9.03687	4.34101	0.023188	single-nuclei	Brain	PFC	10X 3' v3	male	438.249	322.12	AD	0.376017	3000	1000	GSM5550476_GSE183068_cleaned_filtered
Astrocyte	Non-degenerative	NA	GSE126836	MD5840	7.04225	2.76668	-1.22853	142	10	132	Control	3609	3553	2004.5	2104	2.33855	1.95857	1.85621	2.72727	2.15152	0.00745215	0.00846267	4	2.98485	-0.00599433	single-nuclei	Brain	Substantia nigra	10X 3' v2	male	303.788	215.152	Control	-1.38108	3000	1000	MD5840_GSE126836_cleaned_filtered
Neuron	PD	90	GSE178265	pPDsHSrSNxi2142	7.10383	2.6923	-1.2609	183	13	170	PD	3479	3698.5	2065	2095.5	2.36609	1.37666	1.40418	1.38235	1.12353	-0.0196873	0.000468466	4.58824	2.93529	-0.0150685	single-nuclei	Brain	Substantia nigra pars compacta	10X 3' v3	male	299.412	112.353	PD	-1.28419	3000	1000	pPDsHSrSNxi2142_GSE178265_cleaned_filtered
Neuron	Non-degenerative	14	PRJNA530977	4899_AMY	3.07692	2.6095	1.05995	195	6	189	Control	3675	12714	2109	4615	2.82653	1.4192	1.29709	4.62963	2.84656	-0.00767329	-0.0284854	25.3492	5.91005	0.0263166	single-nuclei	Brain	Amygdala	10X 3' v2	male	613.228	284.656	Control	0.336068	3000	1000	4899_AMY_PRJNA530977_cleaned_filtered
Microglia	PD	81	GSE189202	GSM5696058	6.27451	2.37716	-1.13277	255	16	239	Diffuse Lewy Body disease, limbic or transitional type	3557.5	3682	1906	1964	2.66284	2.03746	1.57458	2.95816	3.14644	0.0636193	-0.00549305	5.41423	3.14644	0.0295891	single-nuclei	Brain	Cingulate gyrus	10X 3' v3	male	316.736	220.084	PD	-0.239953	3000	1000	GSM5696058_GSE189202_cleaned_filtered
Fibroblast	Non-degenerative	61	GSE183068	GSM5550502	3.36134	2.35547	0.267582	119	4	115	Normal	4249	5207	1891	2119	3.09374	1.35439	0.473465	1.90435	5.02609	0.0119163	-0.0393929	11.9217	5.02609	0.0660015	single-nuclei	Brain	PFC	10X 3' v3	male	506.087	145.217	Control	1.27638	3000	1000	GSM5550502_GSE183068_cleaned_filtered
Microglia	AD	83	GSE160936	A402_14	2.61921	2.3008	1.45686	1489	39	1450	AD	7057	8262	2818	3094	3.17929	2.29841	1.83292	8.13724	4.01517	0.0599583	-0.00862094	20.8724	6.44414	0.0297551	single-nuclei	Brain	SSC EC	10X 3' v3	male	666.897	401.517	AD	1.57743	3000	1000	A402_14_GSE160936_cleaned_filtered
Pericyte	PD	66	GSE157783	IPD2	5.36913	2.21011	-0.915617	149	8	141	IPD	3763.5	5799	2117.5	2816	2.21775	2.02895	1.9824	4.39007	2.73759	0.033903	0.00692847	5.75177	3.4539	-0.0207598	single-nuclei	Brain	Midbrain	10X 3' v3	male	346.099	273.759	PD	-1.80618	3000	1000	IPD2_GSE157783_cleaned_filtered
Microglia	PD	82	GSE178265	pPDsHSrSNxi3887	2.97542	2.1989	0.535151	1546	46	1500	PD	7446	8134	3416	3742	2.72168	2.31519	1.91221	7.87	4.06333	0.0577914	0.00239099	11.9973	5.35733	0.0243523	single-nuclei	Brain	Substantia nigra pars compacta	10X 3' v3	male	542.267	406.333	PD	-0.0328737	3000	1000	pPDsHSrSNxi3887_GSE178265_cleaned_filtered
Pericyte	PD	78	GSE178265	pPDsHSrSNxi4568	4.51807	2.19316	-0.598645	332	15	317	PD	5382	5850	2552	2722	2.49412	1.85931	2.029	3.73502	2.58991	0.0115237	0.0200886	7.63722	3.84858	0.0114409	single-nuclei	Brain	Substantia nigra pars compacta	10X 3' v3	male	388.959	258.991	PD	-0.833643	3000	1000	pPDsHSrSNxi4568_GSE178265_cleaned_filtered
Microglia	PD	75	GSE178265	pPDsHSrSNxi4775	3.52546	2.1335	-0.068281	1787	63	1724	PD	5839	6290	2769	2931.5	2.75417	2.34063	1.74072	6.33411	3.38631	0.0617201	-0.0127256	9.79176	4.53886	0.0325017	single-nuclei	Brain	Substantia nigra pars compacta	10X 3' v3	male	460.673	338.631	PD	0.0814484	3000	1000	pPDsHSrSNxi4775_GSE178265_cleaned_filtered
OPC	AD	83	GSE160936	A163_17	2.4	2.11911	1.5865	125	3	122	AD	10690	8192.5	4045	3326	3.2272	1.30312	0.660342	2.48361	2.02459	-0.0637851	-0.124158	20.5984	6.03279	0.0448232	single-nuclei	Brain	SSC EC	10X 3' v3	male	684.426	202.459	AD	1.746	3000	1000	A163_17_GSE160936_cleaned_filtered
Microglia	HD	65	GSE152058	3881	3.38983	2.03379	-0.041253	177	6	171	HD	3479.5	5226	1877.5	2398	2.97665	2.29646	2.0586	5.4386	3.02339	0.0983602	0.0434123	11.0468	4.60234	0.131226	single-nuclei	Brain	Putamen Caudate	10X 3' v3	male	464.327	302.339	HD	0.86434	3000	1000	3881_GSE152058_cleaned_filtered
OPC	AD	81	GSE183068	GSM5550466	3.67647	2.00529	-0.257299	136	5	131	AD	4805	5119	2098	2189	3.23612	1.3875	0	2.07634	4.32824	0.0138235	-0.0597401	14.3206	4.32824	0.0295782	single-nuclei	Brain	PFC	10X 3' v3	male	435.115	146.565	AD	1.77741	3000	1000	GSM5550466_GSE183068_cleaned_filtered
Astrocyte	Non-degenerative	NA	GSE126836	MD6063	6.55391	1.9647	-1.30172	473	31	442	Control	3174	3518.5	1926	2070.5	2.29208	1.96884	2.39065	2.58371	2.10407	0.00703772	0.0514893	3.49548	2.86878	-0.00831638	single-nuclei	Brain	Substantia nigra	10X 3' v2	male	293.891	210.407	Control	-1.54462	3000	1000	MD6063_GSE126836_cleaned_filtered
OPC	MS	61	GSE179590	S8	2.87081	1.9486	0.357361	209	6	203	MS	7963.5	6822	3507	3186	3.01666	1.51774	0.994818	2.58128	5.10837	-0.00392434	-0.0639847	13.4581	5.10837	0.165334	single-nuclei	Brain	DLPFC	10X 3' v3	male	518.227	202.463	MS	1.00512	3000	1000	S8_GSE179590_cleaned_filtered
Microglia	Non-degenerative	73	GSE160936	A127_11	2.73973	1.9225	0.482321	1168	32	1136	Non-disease control	4639	4833.5	2247	2333.5	3.08595	2.37084	1.65392	5.40757	3.02905	0.0618078	-0.0404369	11.3988	5.21391	0.0241015	single-nuclei	Brain	SSC EC	10X 3' v3	male	535.123	302.905	Control	1.24895	3000	1000	A127_11_GSE160936_cleaned_filtered
OPC	AD	90	GSE174367	GSM5292848	3.95137	1.90274	-0.467843	329	13	316	AD	4208	4133	1998	2026.5	3.09233	1.26962	0	1.27848	1.06962	-0.0115661	-0.0522307	9.37975	4.0443	0.140409	single-nuclei	Brain	Frontal cortex	10X 3' v3	male	406.646	106.962	AD	1.27141	3000	1000	GSM5292848_GSE174367_cleaned_filtered
OPC	Non-degenerative	80	GSE152058	4294	2.96804	1.8667	0.173842	438	13	425	Control	4840	6184	2246	2660	3.07839	1.33519	0	2.11059	1.58588	-0.00939431	-0.0697208	13.7271	4.46353	0.145663	single-nuclei	Brain	Putamen Caudate	10X 3' v3	male	493.412	158.588	Control	1.22236	3000	1000	4294_GSE152058_cleaned_filtered
Neuron	Non-degenerative	6	PRJNA530977	5408_AMY	2.45098	1.84696	0.794885	204	5	199	Control	3890	9176	2043	3632	3.03729	1.3875	1.45314	3.90452	2.1809	-0.0106629	-0.00145255	28.4171	5.55276	0.0742792	single-nuclei	Brain	Amygdala	10X 3' v2	male	577.387	218.09	Control	1.07771	3000	1000	5408_AMY_PRJNA530977_cleaned_filtered
Microglia	AD	90	GSE167494	GSM5106122	3.72671	1.68468	-0.464506	161	6	155	AD	4213.5	4205	2389	2335	2.72159	2.32944	2.23229	4.35484	3.95484	0.105089	0.0673825	6.86452	3.95484	0.0497218	single-nuclei	Brain	DLPFC	10X 3' v3	male	407.097	290.323	AD	-0.0331856	3000	1000	GSM5106122_GSE167494_cleaned_filtered
Neuron	MS	61	GSE179590	S8	2.1021	1.68037	1.16629	333	7	326	MS	3810	12708.5	2134	4656.5	2.84716	1.21372	1.40884	3.43558	6.15031	-0.0464561	-0.0247126	20.365	6.15031	0.137029	single-nuclei	Brain	DLPFC	10X 3' v3	male	627.607	231.902	MS	0.40867	3000	1000	S8_GSE179590_cleaned_filtered
Neuron	MS	52	GSE179590	S2	1.9337	1.66784	1.64335	1086	21	1065	MS	4056	14598	2260	5111	2.80944	1.31781	1.78019	4.02817	6.77183	-0.0440158	-0.019229	22.9033	6.77183	0.141086	single-nuclei	Brain	DLPFC	10X 3' v3	male	692.113	280.094	MS	0.275939	3000	1000	S2_GSE179590_cleaned_filtered
OPC	AD	60	GSE183068	GSM5550496	2.38095	1.66698	0.621977	294	7	287	AD	7513	7909	3074	3045	3.2044	1.36158	1.0542	2.37631	5.47735	-0.00675348	-0.0407662	19.5714	5.47735	0.0367379	single-nuclei	Brain	PFC	10X 3' v3	male	554.007	177.7	AD	1.66577	3000	1000	GSM5550496_GSE183068_cleaned_filtered
OPC	Other dementias	67	GSE173731	4494	2.31884	1.66019	0.705362	345	8	337	Dementia	8385.5	8317	2956	3084	3.17484	1.25539	0.927001	2.2997	5.61424	-0.0020977	-0.0283227	20.4362	5.61424	0.138462	single-nuclei	Brain	Caudate Putamen	10X 3' v3	male	565.282	164.392	Dementia	1.56177	3000	1000	4494_GSE173731_cleaned_filtered
OPC	AD	79	GSE183068	GSM5550476	1.92926	1.62896	1.5174	311	6	305	AD/TLBD	15483	14373	4078	4085	3.24029	1.30744	0.953562	4.24918	6.60984	-0.00300136	-0.0580813	36.9836	6.60984	0.0372715	single-nuclei	Brain	PFC	10X 3' v3	male	675.082	277.705	AD	1.79208	3000	1000	GSM5550476_GSE183068_cleaned_filtered
Microglia	PD	79	GSE157783	IPD5	3.12849	1.61428	-0.155316	895	28	867	IPD	5054.5	5922	2382	2684	2.8525	1.98478	1.55653	4.22261	2.76009	0.0435257	-0.00939684	10.6275	4.47866	0.0827337	single-nuclei	Brain	Midbrain	10X 3' v3	male	448.904	276.009	PD	0.427447	3000	1000	IPD5_GSE157783_cleaned_filtered
OPC	HD	56	GSE152058	2665	2.41935	1.61412	0.497607	124	3	121	HD	5483	8478	2256	2838	3.16466	1.16246	0	2.1405	1.5124	-0.0148548	-0.0509525	21.9504	4.90083	0.175197	single-nuclei	Brain	Putamen Caudate	10X 3' v3	male	537.19	151.24	HD	1.52595	3000	1000	2665_GSE152058_cleaned_filtered
OPC	AD	83	GSE183068	GSM5550451	2.09205	1.61312	1.03481	239	5	234	AD	11948	9961.5	3717	3480.5	3.20003	1.44351	0.82576	3.43162	5.99145	0.00705227	-0.0628648	24.6538	5.99145	0.0359068	single-nuclei	Brain	PFC	10X 3' v3	male	609.829	235.897	AD	1.65039	3000	1000	GSM5550451_GSE183068_cleaned_filtered
Microglia	AD	71	GSE183068	GSM5550489	3.2967	1.57635	-0.28728	273	9	264	AD	4455	5454	2268	2499.5	2.78418	2.08225	1.8965	4.16667	4.2803	0.0649108	0.00865227	9.02652	4.2803	0.015676	single-nuclei	Brain	PFC	10X 3' v3	male	431.061	266.667	AD	0.187035	3000	1000	GSM5550489_GSE183068_cleaned_filtered
Microglia	Non-degenerative	79	GSE174367	GSM5292854	3.05206	1.57141	-0.132148	557	17	540	Control	4147	4251	1943	2147.5	3.09921	1.94275	1.35931	2.77963	1.90926	0.0328464	-0.0257838	10.013	4.49444	0.154794	single-nuclei	Brain	Frontal cortex	10X 3' v3	male	452.037	190.926	Control	1.29561	3000	1000	GSM5292854_GSE174367_cleaned_filtered
Microglia	Non-degenerative	77	GSE160936	A053_11	1.85759	1.5702	1.56287	1938	36	1902	Non-disease control	6944	7801.5	2708	2947	3.29224	2.03085	1.64555	5.92955	3.28707	0.022534	-0.026948	22.857	6.61619	0.0391306	single-nuclei	Brain	SSC EC	10X 3' v3	male	681.23	328.707	Control	1.9749	3000	1000	A053_11_GSE160936_cleaned_filtered
OPC	Non-degenerative	NA	GSE164485	NPBB139	1.97044	1.5666	1.21112	203	4	199	Control	12590	10786	4208.5	3813	3.25848	1.14014	0.689513	2.60804	1.83417	-0.0382127	-0.0810872	28.804	6.24623	0.274294	single-nuclei	Brain	Brain	10X 3' v3	male	633.668	183.417	Control	1.85607	3000	1000	NPBB139_GSE164485_cleaned_filtered
Microglia	Other dementias	71	GSE174332	191113_FTLD_225_snRNA-H5	3.64964	1.53591	-0.500183	137	5	132	FTLD	3609	3675	2008	2106.5	3.02317	2.50336	1.42087	4.24242	2.58333	0.0218944	-0.0935935	7.63636	3.90152	0.0263196	single-nuclei	Brain	Motor cortex	10X 3' v3	male	402.273	258.333	LBD/FTLD	1.02803	3000	1000	191113_FTLD_225_snRNA-H5_GSE174332_cleaned_filtered
Neuron	MS	57	GSE179590	S10	1.72414	1.44732	1.60159	406	7	399	MS	4115	13695	2267	5062	2.87518	1.32618	1.78142	3.8396	6.63659	-0.0462423	-0.000183164	23.3634	6.63659	0.149924	single-nuclei	Brain	DLPFC	10X 3' v3	male	686.466	264.411	MS	0.507275	3000	1000	S10_GSE179590_cleaned_filtered
OPC	Non-degenerative	79	GSE174367	GSM5292854	2.41379	1.44723	0.308803	870	21	849	Control	7249	7272	3140	3013	2.97339	1.24796	1.54081	1.94229	1.59128	-0.0201106	-0.00583578	14.6514	5.07774	0.136168	single-nuclei	Brain	Frontal cortex	10X 3' v3	male	511.661	159.128	Control	0.85288	3000	1000	GSM5292854_GSE174367_cleaned_filtered
Microglia	Non-degenerative	74	GSE160936	A319_11	2.1097	1.4408	0.689393	2133	45	2088	Non-disease control	5034	5641	2317	2531	3.12465	1.89356	1.27815	3.66954	2.44732	-0.00457802	-0.0584047	13.658	5.50192	0.0248785	single-nuclei	Brain	EC SSC	10X 3' v3	male	563.123	244.732	Control	1.38513	3000	1000	A319_11_GSE160936_cleaned_filtered
OPC	PD	90	GSE178265	pPDsHSrSNxi2142	3.25733	1.38905	-0.372566	307	10	297	PD	4394	4577	2221.5	2319	2.98226	1.36071	0.504207	1.64983	1.37037	-0.00867475	-0.0409336	9.35017	4.11448	0.0482085	single-nuclei	Brain	Substantia nigra pars compacta	10X 3' v3	male	419.529	137.037	PD	0.884095	3000	1000	pPDsHSrSNxi2142_GSE178265_cleaned_filtered
Oligodendrocyte	HD	53	GSE152058	4254	6.75676	1.38717	-1.46409	814	55	759	HD	3602	4074	1741	2019	2.34592	1.41541	1.46365	1.94335	1.48353	0.0196582	0.0268836	4.86957	2.62187	0.0236236	single-nuclei	Brain	Caudate Putamen	10X 3' v3	male	271.937	148.353	HD	-1.35516	3000	1000	4254_GSE152058_cleaned_filtered
Oligodendrocyte	PD	90	GSE178265	pPDsHSrSNxi2142	3.26797	1.38244	-0.382072	306	10	296	PD	4394	4563	2221.5	2318.5	2.98085	1.36001	0.504207	1.64527	1.36486	-0.00874771	-0.0409336	9.32095	4.10135	0.0479198	single-nuclei	Brain	Substantia nigra pars compacta	10X 3' v3	male	418.243	136.486	PD	0.879111	3000	1000	pPDsHSrSNxi2142_GSE178265_cleaned_filtered
Oligodendrocyte	Non-degenerative	70	GSE152058	4308	5.51664	1.33117	-1.20651	1142	63	1079	Control	3769	4098	1805	1924	2.43817	1.17315	1.29542	1.16033	0.969416	-0.011603	-0.00923666	5.23262	2.93327	0.0502322	single-nuclei	Brain	Caudate Putamen	10X 3' v3	male	306.766	96.9416	Control	-1.03054	3000	1000	4308_GSE152058_cleaned_filtered
Neuron	AD	85.8289	syn18485175	48	1.88679	1.32105	0.862566	106	2	104	AD	3245	10123.5	1827	4518	2.57769	1.58564	1.40859	4.16346	2.77885	0.0107801	-0.00675462	13.3846	5.68269	0.111541	single-nuclei	Brain	DLPFC	10X 3' v2	male	586.538	277.885	AD	-0.539571	3000	1000	48_syn18485175_cleaned_filtered
Astrocyte	Non-degenerative	79	GSE174367	GSM5292854	3.10192	1.26173	-0.356904	677	21	656	Control	3604	7198.5	1718	2694.5	2.49371	1.73282	1.93985	3.9497	2.24238	0.0271049	0.0303508	9.07012	4.19055	0.0704615	single-nuclei	Brain	Frontal cortex	10X 3' v3	male	421.646	224.238	Control	-0.835109	3000	1000	GSM5292854_GSE174367_cleaned_filtered
Neuron	Non-degenerative	NA	GSE164485	NPBB052	2.88462	1.25475	-0.23142	104	3	101	Control	3771	5396	1894	2337	2.91367	1.09324	1.61878	1.41584	1.07921	-0.036914	-0.0137287	12.4059	4.32673	0.1947	single-nuclei	Brain	Brain	10X 3' v3	male	438.614	107.921	Control	0.64273	3000	1000	NPBB052_GSE164485_cleaned_filtered
OPC	Non-degenerative	11	GSE173731	E372	1.71821	1.24392	1.04487	291	5	286	Epilepsy, developmental malformation	9595	8684	3097	3260	3.17381	1.47942	0.585908	3.84615	5.16783	-0.0234206	-0.077354	22.7133	5.16783	0.154991	single-nuclei	Brain	Temporal lobe	10X 3' v3	male	611.189	246.853	Epilepsy, developmental malformation	1.55812	3000	1000	E372_GSE173731_cleaned_filtered
Microglia	Non-degenerative	80	GSE173731	4294	3.125	1.23892	-0.382371	448	14	434	Pancreatic cancer	4926	4515	2460.5	2339.5	2.90536	1.90096	1.47864	3.02535	4.05991	0.0445774	-0.0127919	8.76728	4.05991	0.108705	single-nuclei	Brain	Caudate Putamen	10X 3' v3	male	418.203	215.899	Pancreatic cancer	0.613481	3000	1000	4294_GSE173731_cleaned_filtered
OPC	Non-degenerative	94	GSE167494	GSM5106101	1.6129	1.21125	1.21672	124	2	122	Non-symptomatic	7598.5	10016	3595.5	4076.5	3.23263	1.53338	1.06215	3.66393	6.04098	-0.012543	-0.054972	26.3689	6.04098	0.171162	single-nuclei	Brain	DLPFC	10X 3' v3	male	634.426	281.967	Control	1.76513	3000	1000	GSM5106101_GSE167494_cleaned_filtered
Astrocyte	Non-degenerative	81	GSE160936	A297_16	2.41667	1.16775	0.043834	1200	29	1171	Non-disease control	4746	4630	2122	2088	2.78429	1.58617	1.229	2.41161	1.60034	-0.0243551	-0.0572726	8.94022	4.61571	0.0168273	single-nuclei	Brain	SSC EC	10X 3' v3	male	475.833	160.034	Control	0.18744	3000	1000	A297_16_GSE160936_cleaned_filtered
Neuron	Non-degenerative	31	GSE144136	20_Control	2.62976	1.14898	-0.132232	1445	38	1407		4083.5	5735	2340	2989	2.64095	1.42087	1.71099	2.10945	1.78038	-0.00770281	-0.013249	8.08458	4.51955	-0.016218	single-nuclei	Brain	DLPFC	10X 3' v2	male	452.026	178.038	Control	-0.316977	3000	1000	20_Control_GSE144136_cleaned_filtered
OPC	Non-degenerative	90	GSE157827	NC7	2.59067	1.13886	-0.111808	193	5	188	None	3792	4084.5	2012	2222.5	3.19449	1.37248	0	1.57979	1.34574	0.0080329	-0.0303639	11.4628	4.5	0.119207	single-nuclei	Brain	Prefrontal cortex	10X 3' v3	male	454.787	134.574	Control	1.63089	3000	1000	NC7_GSE157827_cleaned_filtered
Neuron	Non-degenerative	72	GSE148822	Donor1	3.24074	1.07762	-0.524068	216	7	209	None	4215	4663	1892	2239	2.61885	1.21265	0	1.35407	1.17225	-0.10314	-0.137338	6.61244	3.54067	0.105614	single-nuclei	Brain	occipital cortex occipitotemporal cortex	10X 3' v3	male	399.043	117.225	Control	-0.394734	3000	1000	Donor1_GSE148822_cleaned_filtered
OPC	Non-degenerative	94	GSE157760	C	1.87166	1.03688	0.460352	374	7	367	Control	4986	7008	2632	3386	2.95163	1.60784	1.35652	3.18801	2.46049	-0.0198422	-0.0319963	14.0245	4.79292	0.024657	single-nuclei	Brain	Cortex	10X 3' v3	male	532.153	246.049	Control	0.776285	3000	1000	C_GSE157760_cleaned_filtered
OPC	Non-degenerative	NA	GSE164485	NPBB105	1.69492	1.02372	0.685851	177	3	174	Control	6740	9605	3096	3273.5	3.03123	1.25746	0.909741	2.71839	1.98276	-0.0204121	-0.0554379	21.546	5.55172	0.222853	single-nuclei	Brain	Brain	10X 3' v3	male	562.644	198.276	Control	1.05642	3000	1000	NPBB105_GSE164485_cleaned_filtered
Astrocyte	AD	83	GSE160936	A402_14	1.37931	0.981118	1.22568	3770	52	3718	AD	7075.5	8546.5	3106.5	3344.5	2.81559	1.6143	0.974674	4.15976	2.76089	-0.0248551	-0.0816295	15.9153	6.12265	0.0167757	single-nuclei	Brain	SSC EC	10X 3' v3	male	635.637	276.089	AD	0.297596	3000	1000	A402_14_GSE160936_cleaned_filtered
Astrocyte	AD	80	GSE174367	GSM5292844	2.33645	0.980665	-0.0410564	856	20	836	AD	3214	8462.5	1570.5	3108	2.55791	1.76759	1.95128	4.4689	2.67105	0.0276397	0.0583453	10.5634	4.59211	0.0791377	single-nuclei	Brain	Frontal cortex	10X 3' v3	male	464.354	267.105	AD	-0.60919	3000	1000	GSM5292844_GSE174367_cleaned_filtered
OPC	PD	66	GSE157783	IPD2	2.45399	0.961705	-0.140236	326	8	318	IPD	6185.5	6306	2625.5	2881	2.97497	1.34314	0.586111	2.09119	1.69182	-0.0164358	-0.0436277	12.827	4.5	0.0859834	single-nuclei	Brain	Midbrain	10X 3' v3	male	450.943	169.182	PD	0.858418	3000	1000	IPD2_GSE157783_cleaned_filtered
Neuron	Non-degenerative	NA	GSE164485	NPBB138	1.18143	0.949342	1.78378	1185	14	1171	Control	6323	17109	2109.5	4956	2.92061	1.16129	0	4.03074	2.70111	-0.0398303	-0.0552135	32.029	6.94108	0.222507	single-nuclei	Brain	Brain	10X 3' v3	male	711.102	270.111	Control	0.667123	3000	1000	NPBB138_GSE164485_cleaned_filtered
Neuron	Non-degenerative	7	PRJNA530977	5144_AMY	1.43541	0.939132	0.998022	209	3	206	Control	4351	14281.5	2259	4573.5	2.88538	1.05905	1.46021	2.74272	2.04854	-0.0355116	-0.035986	25.1602	5.99029	0.0417666	single-nuclei	Brain	Amygdala	10X 3' v2	male	604.854	204.854	Control	0.543181	3000	1000	5144_AMY_PRJNA530977_cleaned_filtered
Neuron	Non-degenerative	42	GSE144136	8_Suicide	2.93758	0.929745	-0.447045	817	24	793		3425.5	5253	2160	2924	2.52158	1.39384	1.44431	1.90164	1.4918	-0.0183231	-0.0201818	6.7024	4.09206	-0.0357537	single-nuclei	Brain	DLPFC	10X 3' v2	male	409.458	149.18	Control	-0.737039	3000	1000	8_Suicide_GSE144136_cleaned_filtered
Neuron	Non-degenerative	18	GSE173731	E379	1.13379	0.928261	1.90947	882	10	872	Epilepsy, developmental malformation	4021	18149	1473	5490.5	2.74477	1.39698	1.19035	6.19381	5.99083	-0.0567245	-0.0324949	30.6135	5.99083	0.0943758	single-nuclei	Brain	Temporal lobe	10X 3' v3	male	728.096	363.073	Epilepsy, developmental malformation	0.0483696	3000	1000	E379_GSE173731_cleaned_filtered
Neuron	Non-degenerative	12	PRJNA530977	5387_AMY	1.66667	0.906258	0.556828	180	3	177	Control	7194	10912	3023	4198	2.6198	1.26395	0.764893	3.70056	2.29944	-0.0226024	-0.0636744	19.3672	5.27119	-0.0202318	single-nuclei	Brain	Amygdala	10X 3' v2	male	545.198	229.944	Control	-0.391385	3000	1000	5387_AMY_PRJNA530977_cleaned_filtered
Neuron	PD	66	GSE157783	IPD2	1.49254	0.905776	0.824855	268	4	264	IPD	3260.5	10613	1369	3873.5	2.93824	1.22514	0	3.01136	1.97727	-0.0447702	-0.0849075	21.0455	5.76136	0.12111	single-nuclei	Brain	Midbrain	10X 3' v3	male	581.439	197.727	PD	0.729164	3000	1000	IPD2_GSE157783_cleaned_filtered
OPC	Other dementias	75	GSE174332	191113_FTLD_226_snRNA-E4	1.96078	0.902599	0.21517	102	2	100	FTLD	6030.5	5851	2028	2292	3.12113	1.07294	0.528414	1.21	1.01	-0.0186079	-0.0359762	12.96	4.62	0.0426525	single-nuclei	Brain	Motor cortex	10X 3' v3	male	499	101	LBD/FTLD	1.37277	3000	1000	191113_FTLD_226_snRNA-E4_GSE174332_cleaned_filtered
Oligodendrocyte	Non-degenerative	55	GSE140231	C2	3.26531	0.891946	-0.619967	245	8	237	Normal	3202.5	3669	1907.5	2087	2.50078	1.9146	1.95786	3.53165	3.81435	0.0187162	0.0393619	7.21097	3.81435	0.0291883	single-nuclei	Brain	Cortex Substantia nigra	10X 3' v2	male	386.076	250.211	Control	-0.810235	3000	1000	C2_GSE140231_cleaned_filtered
OPC	Non-degenerative	85	GSE174332	191114_PN_328_snRNA-F9	2.1164	0.8515	0.0306805	189	4	185	Control	4908	5091	2410	2439	3.11375	1.26231	1.31997	1.4	1.24865	-0.00990165	-0.0105402	12.0973	4.2973	0.0379387	single-nuclei	Brain	Motor cortex	10X 3' v3	male	474.054	124.865	Control	1.3468	3000	1000	191114_PN_328_snRNA-F9_GSE174332_cleaned_filtered
OPC	AD	80	GSE183068	GSM5550467	1.5544	0.81412	0.584559	193	3	190	AD	3172	8200	1547	3083.5	3.27624	1.41322	0	3.06842	5.41053	0.00439241	-0.0448536	24.3474	5.41053	0.0384191	single-nuclei	Brain	PFC	10X 3' v3	male	548.947	205.789	AD	1.91857	3000	1000	GSM5550467_GSE183068_cleaned_filtered
Oligodendrocyte	Non-degenerative	70	GSE173731	4308	4.51128	0.809587	-1.07952	665	30	635	Leukemia	3458	3881	1745.5	1884	2.57535	1.14993	0	1.13858	3.19685	-0.00567416	-0.0183361	7.11181	3.19685	-0.0170495	single-nuclei	Brain	Caudate Putamen	10X 3' v3	male	323.937	97.9528	Leukemia	-0.547809	3000	1000	4308_GSE173731_cleaned_filtered
OPC	AD	91	GSE183068	GSM5550450	1.10193	0.808404	1.54099	363	4	359	AD	16532.5	15921	4442.5	4438	3.25686	1.35835	0.628336	4.74373	6.65738	-0.002205	-0.0706041	39.0167	6.65738	0.0386665	single-nuclei	Brain	PFC	10X 3' v3	male	678.273	298.329	AD	1.85038	3000	1000	GSM5550450_GSE183068_cleaned_filtered
OPC	PD	77	GSE157783	IPD3	2.85714	0.808104	-0.46805	140	4	136	IPD	3287	4636.5	1832	2248	3.0658	1.15558	0	1.35294	1.09559	-0.0236178	-0.0840112	10.5294	4.02941	0.105167	single-nuclei	Brain	Midbrain	10X 3' v3	male	406.618	109.559	PD	1.17805	3000	1000	IPD3_GSE157783_cleaned_filtered
Astrocyte	AD	86	GSE174367	GSM5292842	2.72206	0.806753	-0.39827	698	19	679	AD	4355	5571	2146	2589	2.61112	1.65461	0	3.14875	2.11929	0.00779907	-0.0648272	9.42121	4.12224	0.0759442	single-nuclei	Brain	Frontal cortex	10X 3' v3	male	416.053	211.929	AD	-0.421932	3000	1000	GSM5292842_GSE174367_cleaned_filtered
Microglia	Non-degenerative	78	GSE148822	Donor8	4.0636	0.78451	-0.954187	566	23	543	None	3291	3341	1876	1892	2.77719	2.37135	2.25827	3.67035	2.40147	0.0386592	0.0172533	5.49355	3.30018	0.109078	single-nuclei	Brain	occipital cortex occipitotemporal cortex	10X 3' v3	male	340.884	240.147	Control	0.162468	3000	1000	Donor8_GSE148822_cleaned_filtered
Astrocyte	PD	77	GSE157783	IPD3	4.06977	0.784148	-0.956243	172	7	165	IPD	3719	3897	2137	2155	2.5598	1.95245	1.41518	2.73333	1.96364	0.0287386	0.00134383	5.31515	3.37576	0.032907	single-nuclei	Brain	Midbrain	10X 3' v3	male	340.606	196.364	PD	-0.602546	3000	1000	IPD3_GSE157783_cleaned_filtered
Microglia	Non-degenerative	27	syn25879216	21476	7.26942	0.781066	-1.65977	8240	599	7641	Epilepsy	4041	4424	1820	1941	2.00973	3.39987	3.45503	13.7914	2.43502	0.129923	0.136433	3.30991	2.43502	0.0287875	single-cell	Brain	Anterior temporal cortex Mesiotemporal lobe	10X 3' v2	male	245.478	396.466	Epilepsy	-2.53818	3000	1000	21476_syn25879216_cleaned_filtered
Astrocyte	Non-degenerative	90	GSE167494	GSM5106118	1.73913	0.777591	0.314192	115	2	113	Non-symptomatic	4822	11424	2470	4137	2.43698	1.67487	1.94907	5.02655	5.00885	0.0282997	0.0834936	12.5575	5.00885	-0.0113482	single-nuclei	Brain	DLPFC	10X 3' v3	male	512.389	314.159	Control	-1.03474	3000	1000	GSM5106118_GSE167494_cleaned_filtered
Microglia	PD	78	GSE178265	pPDsHSrSNxi4568	3.02457	0.756146	-0.573214	529	16	513	PD	3915	4640	1952	2295	2.93705	1.56654	1.62354	2.17154	1.73684	-0.00558188	-0.00503932	9.70565	3.89864	0.0419901	single-nuclei	Brain	Substantia nigra pars compacta	10X 3' v3	male	392.398	173.684	PD	0.724974	3000	1000	pPDsHSrSNxi4568_GSE178265_cleaned_filtered
Neuron	Non-degenerative	80.0986	syn18485175	1	1.2987	0.744711	0.884274	154	2	152	Control	4459.5	11163	2390	4567	2.71997	1.45897	2.2237	4.14474	2.78947	0.00353537	0.0769683	15.6316	5.80263	0.113833	single-nuclei	Brain	DLPFC	10X 3' v2	male	589.474	278.947	Control	-0.0389042	3000	1000	1_syn18485175_cleaned_filtered
Astrocyte	AD	88	GSE167494	GSM5106108	1.37405	0.71121	0.698812	655	9	646	AD	7618	12758.5	3077	4381.5	2.52471	1.73153	1.38381	5.81889	5.46285	0.028763	-0.023432	14.6981	5.46285	0.092448	single-nuclei	Brain	DLPFC	10X 3' v3	male	564.396	350.774	AD	-0.72602	3000	1000	GSM5106108_GSE167494_cleaned_filtered
OPC	PD	72	GSE189202	GSM5696060	1.40515	0.672291	0.594978	427	6	421	GBA N370S/WT - heterozygous for GBA	9511.5	8199	3314	3090	3.20246	1.29266	0.89447	2.32067	5.45131	-0.00447628	-0.0639354	19.6223	5.45131	0.090548	single-nuclei	Brain	Cingulate gyrus	10X 3' v3	male	550.356	182.423	PD	1.65894	3000	1000	GSM5696060_GSE189202_cleaned_filtered
Oligodendrocyte	Non-degenerative	11	GSE173731	E311	5.42005	0.641943	-1.34343	369	20	349	Seizure disorder	3574.5	3843	1869	1951	2.38437	1.32183	1.31019	1.46991	2.59026	-0.0323708	-0.0404173	5.06304	2.59026	-0.0129424	single-nuclei	Brain	Temporal lobe	10X 3' v3	male	288.252	123.209	Seizure disorder	-1.21986	3000	1000	E311_GSE173731_cleaned_filtered
Astrocyte	PD	75	GSE178265	pPDsHSrSNxi4775	1.27979	0.629227	0.718137	2266	29	2237	PD	8013	10724	3044	3896	2.54858	1.75028	1.09291	5.65087	3.39696	0.0145749	-0.0326113	13.1717	5.58605	0.0170879	single-nuclei	Brain	Substantia nigra pars compacta	10X 3' v3	male	567.009	339.696	PD	-0.642	3000	1000	pPDsHSrSNxi4775_GSE178265_cleaned_filtered
Astrocyte	HD	72	GSE173731	2030	1.50451	0.617876	0.398041	997	15	982	HD	4390	9004.5	2193	3331	2.66309	1.6088	1.1872	4.05397	5.16497	0.0297363	-0.00811837	13.6018	5.16497	0.0524674	single-nuclei	Brain	Caudate Putamen	10X 3' v3	male	523.727	247.556	HD	-0.239054	3000	1000	2030_GSE173731_cleaned_filtered
Astrocyte	Non-degenerative	49	GSE178265	pPDsHSrSNxi6173	1.82292	0.596573	0.0626878	768	14	754		4102.5	8771	2267	3763	2.37779	1.85838	2.14135	5.00133	3.51857	0.0253531	0.0633708	8.83422	4.71088	-0.00603933	single-nuclei	Brain	Substantia nigra pars compacta	10X 3' v3	male	478.382	351.857	Control	-1.24302	3000	1000	pPDsHSrSNxi6173_GSE178265_cleaned_filtered
OPC	Non-degenerative	84	GSE174332	191114_PN_325_snRNA-F8	1.8018	0.587978	0.0732971	111	2	109	Control	4149.5	5257	2008	2414	3.23671	1.39475	0.817687	1.77064	1.50459	0.0100253	-0.0129176	13.789	4.52294	0.0405651	single-nuclei	Brain	Motor cortex	10X 3' v3	male	479.817	150.459	Control	1.77948	3000	1000	191114_PN_325_snRNA-F8_GSE174332_cleaned_filtered
Microglia	Non-degenerative	68	GSE183068	GSM5550500	1.98171	0.583345	-0.0730271	656	13	643	Normal	5451	5873	2466	2571	2.88897	2.18394	1.50584	4.97823	4.55521	0.0792303	0.019836	10.5008	4.55521	0.0281223	single-nuclei	Brain	PFC	10X 3' v3	male	460.031	294.712	Control	0.555787	3000	1000	GSM5550500_GSE183068_cleaned_filtered
Oligodendrocyte	Non-degenerative	70	GSE140231	C1	3.33333	0.570388	-0.777111	150	5	145	Normal	3698	3908	2077	2217	2.55804	2.01912	2.51293	3.27586	3.58621	0.0376909	0.0965747	5.47586	3.58621	0.0462206	single-nuclei	Brain	Cortex Substantia nigra	10X 3' v2	male	364.828	240	Control	-0.608739	3000	1000	C1_GSE140231_cleaned_filtered
OPC	Other dementias	62	GSE174332	201025_FTLD_239_snRNA-C11	1.72414	0.562541	0.118768	116	2	114	FTLD	4352.5	4845.5	2170.5	2361	3.20459	1.31576	0.617248	1.5614	1.22807	-0.0055963	-0.0391518	12.0263	4.29825	0.0408046	single-nuclei	Brain	Motor cortex	10X 3' v3	male	485.965	122.807	LBD/FTLD	1.66645	3000	1000	201025_FTLD_239_snRNA-C11_GSE174332_cleaned_filtered
Microglia	Non-degenerative	90	GSE174367	GSM5292852	3.11284	0.553006	-0.698167	257	8	249	Control	3251.5	3328	1809	1811	2.98702	2.25725	2.43106	3.51807	2.20884	0.0828836	0.0387061	7.26506	3.74699	0.138525	single-nuclei	Brain	Frontal cortex	10X 3' v3	male	375.502	220.884	Control	0.900826	3000	1000	GSM5292852_GSE174367_cleaned_filtered
Neuron	Non-degenerative	NA	GSE164485	NPBB131	1.08945	0.550768	0.913247	1744	19	1725	Control	3588	12252	1512	3772	2.81925	1.18736	1.01152	3.22261	2.03536	-0.0264151	-0.0243057	22.6672	5.87304	0.20126	single-nuclei	Brain	Brain	10X 3' v3	male	593.391	203.536	Control	0.310457	3000	1000	NPBB131_GSE164485_cleaned_filtered
Astrocyte	Non-degenerative	90	GSE174367	GSM5292852	3.18182	0.547984	-0.727631	660	21	639	Control	4515	4667	2168	2329	2.55103	1.9237	1.96977	3.08451	2.1784	0.0307373	0.0332193	6.24257	3.68701	0.0699401	single-nuclei	Brain	Frontal cortex	10X 3' v3	male	371.518	217.84	Control	-0.633384	3000	1000	GSM5292852_GSE174367_cleaned_filtered
OPC	AD	71	GSE183068	GSM5550489	0.8	0.513074	1.5645	375	3	372	AD	11428	12915	3792	4068	3.22708	1.21017	1.01163	3.47312	6.69892	-0.0162493	-0.0524301	32.3333	6.69892	0.0419946	single-nuclei	Brain	PFC	10X 3' v3	male	681.452	250.806	AD	1.74559	3000	1000	GSM5550489_GSE183068_cleaned_filtered
Microglia	Non-degenerative	80	GSE152058	4294	3.10559	0.476967	-0.725584	322	10	312	Control	3760	3872.5	2005.5	2082.5	2.84052	1.97083	1.4225	2.95833	2.10256	0.0450791	-0.0180173	7.4359	3.67628	0.0967066	single-nuclei	Brain	Putamen Caudate	10X 3' v3	male	371.795	210.256	Control	0.385299	3000	1000	4294_GSE152058_cleaned_filtered
Oligodendrocyte	Other dementias	66	GSE174332	200721_FTLD_229_snRNA-B2	5.46939	0.467923	-1.39066	1225	67	1158	FTLD	3463	4013.5	1733	1928.5	2.36996	1.19591	1.32507	1.14076	0.949914	0.00294877	-0.00248771	4.6848	2.71071	0.00584678	single-nuclei	Brain	Motor cortex	10X 3' v3	male	281.865	94.9914	LBD/FTLD	-1.27056	3000	1000	200721_FTLD_229_snRNA-B2_GSE174332_cleaned_filtered
Microglia	Non-degenerative	68	GSE178175	GSM5381311	1.85759	0.445593	-0.0830557	646	12	634	Control	5112	5821	2419	2558	2.8857	2.1974	1.52349	4.98738	4.54416	0.0783077	0.0303012	10.4132	4.54416	0.037473	single-nuclei	Brain	PFC	10X 3' v3	male	458.675	292.429	Control	0.544307	3000	1000	GSM5381311_GSE178175_cleaned_filtered
Neuron	HD	56	GSE173731	2665	1.16279	0.434216	0.601044	172	2	170	HD	3408.5	7668.5	1881	2980	3.02053	1.10315	0.726949	2.30588	5.42353	-0.0194279	-0.0420472	28.9176	5.42353	0.129135	single-nuclei	Brain	Caudate Putamen	10X 3' v3	male	551.176	154.118	HD	1.01875	3000	1000	2665_GSE173731_cleaned_filtered
Neuron	Non-degenerative	11	GSE173731	E311	0.600858	0.424376	2.06699	1165	7	1158	Seizure disorder	3969	18913.5	1747	5252.5	2.72519	1.2537	1.04402	5.50604	6.07254	-0.0601531	-0.0560135	30.6978	6.07254	0.102426	single-nuclei	Brain	Temporal lobe	10X 3' v3	male	749.396	347.841	Seizure disorder	-0.0205453	3000	1000	E311_GSE173731_cleaned_filtered
Astrocyte	Non-degenerative	70	GSE173731	4308	1.10981	0.419472	0.656776	1712	19	1693	Leukemia	6743	8935	2994	3457	2.7449	1.34599	0.675194	2.83757	5.50207	0.0055873	-0.0447932	13.6881	5.50207	0.064336	single-nuclei	Brain	Caudate Putamen	10X 3' v3	male	558.712	209.155	Leukemia	0.0488364	3000	1000	4308_GSE173731_cleaned_filtered
Astrocyte	PD	81	GSE157783	IPD4	2.75229	0.414847	-0.604203	218	6	212	IPD	3602.5	6069.5	2109	3006	2.34168	1.93694	2.04817	4.56604	2.87264	0.0326344	0.0210295	6.7783	3.87264	-0.0044221	single-nuclei	Brain	Midbrain	10X 3' v3	male	388.208	287.264	PD	-1.37008	3000	1000	IPD4_GSE157783_cleaned_filtered
OPC	AD	71	GSE183068	GSM5550479	1.22699	0.413213	0.486693	326	4	322	AD	11906.5	8602.5	3563.5	3029	3.2346	1.35969	0.797659	2.67391	5.28882	0.00455143	-0.0524015	22.413	5.28882	0.032057	single-nuclei	Brain	PFC	10X 3' v3	male	535.714	194.099	AD	1.77205	3000	1000	GSM5550479_GSE183068_cleaned_filtered
Oligodendrocyte	Other dementias	71	GSE174332	191113_FTLD_217_snRNA-D11	4.91803	0.398639	-1.28587	610	30	580	FTLD	3453	3682	1989.5	2094.5	2.37025	1.29522	1.35535	1.16379	1.03966	-0.00128861	-0.00570288	4.09828	2.83621	0.0034531	single-nuclei	Brain	Motor cortex	10X 3' v3	male	296.034	103.966	LBD/FTLD	-1.26953	3000	1000	191113_FTLD_217_snRNA-D11_GSE174332_cleaned_filtered
OPC	Non-degenerative	NA	GSE126836	MD5840	2.48447	0.39404	-0.488728	161	4	157	Control	3535	3474	2177	2082	3.04421	1.82962	1.34971	1.76433	1.48408	-0.0309268	-0.0497265	7.36943	3.98089	0.0322331	single-nuclei	Brain	Substantia nigra	10X 3' v2	male	403.822	148.408	Control	1.10206	3000	1000	MD5840_GSE126836_cleaned_filtered
OPC	Non-degenerative	NA	GSE164485	NPBB131	0.75188	0.37766	1.28988	266	2	264	Control	4784	11792.5	2074.5	3785.5	3.33795	1.21592	0	3.21212	2.24242	-0.0180259	-0.0908584	33.0227	6.33712	0.286243	single-nuclei	Brain	Brain	10X 3' v3	male	644.318	224.242	Control	2.13573	3000	1000	NPBB131_GSE164485_cleaned_filtered
Oligodendrocyte	AD	80	GSE167494	GSM5106120	4.81928	0.366206	-1.27059	166	8	158	AD	4072.5	5053	2044	2368.5	2.41702	1.18146	0.597188	1.51266	2.93038	-0.0163478	-0.0404749	5.8481	2.93038	-0.0292159	single-nuclei	Brain	DLPFC	10X 3' v3	male	298.101	124.684	AD	-1.10496	3000	1000	GSM5106120_GSE167494_cleaned_filtered
Microglia	Non-degenerative	NA	GSE164485	NPBB131	1.40351	0.358201	0.227829	285	4	281	Control	4062.5	5716	1898.5	2631	3.0253	2.0527	1.13884	4.67972	2.76512	0.0665791	-0.0360274	13.3274	4.9395	0.220137	single-nuclei	Brain	Brain	10X 3' v3	male	500.712	276.512	Control	1.03553	3000	1000	NPBB131_GSE164485_cleaned_filtered
Neuron	Non-degenerative	75	GSE183068	GSM5550503	0.765306	0.357008	1.19977	392	3	389	Normal	7504	11455	2951	4012	2.88854	1.18691	1.60901	3.34447	6.18766	-0.0240522	0.0392905	22.6812	6.18766	0.00787079	single-nuclei	Brain	PFC	10X 3' v3	male	632.134	220.566	Control	0.554299	3000	1000	GSM5550503_GSE183068_cleaned_filtered
Neuron	PD	75	GSE178265	pPDsHSrSNxi4775	0.454545	0.34185	2.53072	440	2	438	PD	4277	25991	2192	6028	3.05758	1.22494	1.87107	6.26027	3.11187	-0.0292273	0.00339296	50.7055	7.9726	0.0649955	single-nuclei	Brain	Substantia nigra pars compacta	10X 3' v3	male	812.1	311.187	PD	1.14914	3000	1000	pPDsHSrSNxi4775_GSE178265_cleaned_filtered
Pericyte	Non-degenerative	86	GSE167494	GSM5106100	2.96296	0.333604	-0.725873	135	4	131	Non-symptomatic	5704	5516	2761	2590	2.5576	1.78224	1.50909	3.08397	3.51908	0.018393	-0.00232181	7.32061	3.51908	0.0761607	single-nuclei	Brain	DLPFC	10X 3' v3	male	371.756	209.16	Control	-0.610285	3000	1000	GSM5106100_GSE167494_cleaned_filtered
Neuron	Non-degenerative	15	PRJNA530977	5242_AMY	0.760456	0.325748	1.13497	263	2	261	Control	4204	14291	2137.5	5032	2.7079	1.36623	1.66455	4.44061	2.85824	-0.0183599	-0.0164652	23.6322	5.96169	0.0182868	single-nuclei	Brain	Amygdala	10X 3' v2	male	623.372	285.824	Control	-0.0813724	3000	1000	5242_AMY_PRJNA530977_cleaned_filtered
OPC	HD	56	GSE173731	2665	1.55039	0.320273	0.0595136	129	2	127	HD	5344	6467	2103.5	2438	3.20515	1.04533	1.06308	1.72441	4.74803	-0.00303352	-0.00667814	17.9685	4.74803	0.128975	single-nuclei	Brain	Caudate Putamen	10X 3' v3	male	477.953	131.496	HD	1.66843	3000	1000	2665_GSE173731_cleaned_filtered
Neuron	AD	87	GSE160936	A096_14	0.862069	0.318676	0.904243	116	1	115	AD	5742	5633	2919	2397	2.9492	1.03962	1.00852	1.71304	1.30435	-0.0820241	-0.12199	13.6522	5.34783	0.0389351	single-nuclei	Brain	SSC EC	10X 3' v3	male	592.174	130.435	AD	0.767755	3000	1000	A096_14_GSE160936_cleaned_filtered
Astrocyte	Non-degenerative	51	GSE186538	HSB237	4.48625	0.311421	-1.20388	1382	62	1320	Control	3500.5	3860.5	1727	2018.5	2.48263	1.41247	1.32711	1.61061	3.02955	0.00698481	-0.00860442	4.87955	3.02955	-0.0159981	single-nuclei	Brain	Dentate gyrus Hippocampus Subiculum Entorhinal cortex	10X 3' v3	male	307.121	136.364	Control	-0.874081	3000	1000	HSB237_GSE186538_cleaned_filtered
OPC	MS	43	GSE179590	S1	0.934579	0.305475	0.752813	107	1	106	MS	5552	12105	2399	4017.5	3.04101	1.45956	1.03003	4.84906	5.64151	0.0135655	-0.0364276	25.4811	5.64151	0.155227	single-nuclei	Brain	DLPFC	10X 3' v3	male	571.698	320.755	MS	1.09081	3000	1000	S1_GSE179590_cleaned_filtered
OPC	Non-degenerative	NA	GSE164485	NPBB138	0.816327	0.302517	0.962122	245	2	243	Control	7046.5	9390	2910	3448	3.33297	1.20638	0.973455	2.61728	1.98354	-0.0197836	-0.0564374	26.6132	5.89712	0.278389	single-nuclei	Brain	Brain	10X 3' v3	male	600	198.354	Control	2.1182	3000	1000	NPBB138_GSE164485_cleaned_filtered
Neuron	Non-degenerative	73	GSE160936	A127_11	0.900901	0.296389	0.794041	111	1	110	Non-disease control	6626	5749.5	2905	2345	2.92432	1.14823	0.919966	1.75455	1.38182	-0.079038	-0.118742	13.8636	5.23636	0.0350637	single-nuclei	Brain	SSC EC	10X 3' v3	male	577.273	138.182	Control	0.680198	3000	1000	A127_11_GSE160936_cleaned_filtered
OPC	AD	84	GSE157827	AD20	1.64384	0.296049	-0.0349403	365	6	359	AD	4105	4141	2073	2133	3.15223	1.19293	0	1.21448	1.00836	-0.00344211	-0.0523757	10.8273	4.64067	0.124666	single-nuclei	Brain	Prefrontal cortex	10X 3' v3	male	465.181	100.836	AD	1.48218	3000	1000	AD20_GSE157827_cleaned_filtered
Microglia	Non-degenerative	61	GSE178175	GSM5381312	1.70807	0.285812	-0.0905485	644	11	633	Control	4773	5816	2372	2557	2.88594	2.19836	1.54096	4.98104	4.53555	0.0784642	0.0367274	10.3918	4.53555	0.0373077	single-nuclei	Brain	PFC	10X 3' v3	male	457.662	292.733	Control	0.54515	3000	1000	GSM5381312_GSE178175_cleaned_filtered
Pericyte	Non-degenerative	17	GSE173731	E268	1.45985	0.285554	0.107523	137	2	135	Epilepsy	4486.5	6028	2446.5	3079	2.22823	1.78197	1.99547	4.37778	4.1037	-0.019439	0.00595481	7.38519	4.1037	0.00803692	single-nuclei	Brain	Temporal lobe	10X 3' v3	male	484.444	281.481	Epilepsy	-1.76932	3000	1000	E268_GSE173731_cleaned_filtered
Neuron	Non-degenerative	30	GSE144136	12_Control	2.29682	0.280395	-0.451461	566	13	553		3912	5594	2306	3083	2.45204	1.52929	1.54762	2.35081	1.80108	-0.00816157	-0.00328627	6.49005	4.08137	-0.0399532	single-nuclei	Brain	DLPFC	10X 3' v2	male	408.861	180.108	Control	-0.981748	3000	1000	12_Control_GSE144136_cleaned_filtered
Microglia	Non-degenerative	61	GSE183068	GSM5550502	3.03951	0.277807	-0.776647	329	10	319	Normal	3664.5	3914	1672	1755	2.83563	2.33195	2.42614	4.54232	3.62382	0.106599	0.147377	7.40439	3.62382	0.0306119	single-nuclei	Brain	PFC	10X 3' v3	male	364.89	241.693	Control	0.368085	3000	1000	GSM5550502_GSE183068_cleaned_filtered
Neuron	AD	83	GSE160936	A402_14	0.595238	0.273101	1.44483	168	1	167	AD	4460	5982	2027	2498	3.10081	0.944187	1.17624	1.7006	1.20958	-0.0937052	-0.0586851	16.9461	6.01796	0.0479467	single-nuclei	Brain	SSC EC	10X 3' v3	male	665.269	120.958	AD	1.30127	3000	1000	A402_14_GSE160936_cleaned_filtered
Oligodendrocyte	PD	75	GSE178265	pPDsHSrSNxi4775	0.782609	0.263619	0.951751	1150	9	1141	PD	11407	10515	4392	4143	2.97091	1.40264	1.10994	3.53637	2.67485	-0.0133711	-0.0452184	20.0131	5.8177	0.0440441	single-nuclei	Brain	Substantia nigra pars compacta	10X 3' v3	male	598.598	267.485	PD	0.844125	3000	1000	pPDsHSrSNxi4775_GSE178265_cleaned_filtered
Microglia	Non-degenerative	38	GSE137444	RM66	4.48179	0.26142	-1.2151	3213	144	3069	Control epilepsy	3520.5	3818	1926.5	2060	2.29837	3.27655	3.25495	11.216	4.11372	0.0766111	0.0812605	4.03454	3.00326	0.155119	single-cell	Brain	Temporal cortex	10X 3' v2	male	305.604	411.372	Control	-1.5225	3000	1000	RM66_GSE137444_cleaned_filtered
OPC	PD	75	GSE178265	pPDsHSrSNxi4775	0.779221	0.260254	0.951796	1155	9	1146	PD	11407	10515.5	4392	4152	2.96863	1.40287	1.10994	3.54014	2.67976	-0.0133097	-0.0452184	19.9895	5.81763	0.0439214	single-nuclei	Brain	Substantia nigra pars compacta	10X 3' v3	male	598.604	267.976	PD	0.836135	3000	1000	pPDsHSrSNxi4775_GSE178265_cleaned_filtered
OPC	AD	90	GSE174367	GSM5292849	1.67785	0.259233	-0.0878968	298	5	293	AD	3267	4820	1731	2310	3.26571	1.66235	1.40141	2.59044	1.98635	0.0328074	-0.00482399	14.1263	4.52218	0.163257	single-nuclei	Brain	Frontal cortex	10X 3' v3	male	458.02	198.635	AD	1.88152	3000	1000	GSM5292849_GSE174367_cleaned_filtered
OPC	Non-degenerative	83	GSE183068	GSM5550504	0.57971	0.248807	1.41707	345	2	343	Normal	12076.5	14083	3573	4174	3.32868	1.19657	0.413458	3.64431	6.4898	-0.0118202	-0.0700897	39.0466	6.4898	0.0475596	single-nuclei	Brain	PFC	10X 3' v3	male	661.516	272.012	Control	2.10311	3000	1000	GSM5550504_GSE183068_cleaned_filtered
OPC	PD	81	GSE157783	IPD4	1.88679	0.243884	-0.239657	106	2	104	IPD	4448	5695.5	2089.5	2581	3.04808	1.3675	0.531806	1.93269	1.59615	-0.00754545	-0.05114	11.7115	4.375	0.1	single-nuclei	Brain	Midbrain	10X 3' v3	male	437.5	159.615	PD	1.1157	3000	1000	IPD4_GSE157783_cleaned_filtered
Neuron	PD	78	GSE178265	pPDsHSrSNxi4568	0.759327	0.239738	0.950558	3029	23	3006	PD	4179	12616.5	2191	4252.5	3.18172	1.45781	1.66652	5.36494	2.77977	-0.0127514	0.00757434	37.9115	5.89687	0.0460278	single-nuclei	Brain	Substantia nigra pars compacta	10X 3' v3	male	598.436	277.977	PD	1.58598	3000	1000	pPDsHSrSNxi4568_GSE178265_cleaned_filtered
Neuron	AD	83.729	syn18485175	16	0.716846	0.238876	1.03688	279	2	277	AD	3403.5	12258	1829.5	4596	2.61634	1.47218	2.54693	4.08303	2.7509	0.00268206	0.117844	15.2852	6.01444	0.110414	single-nuclei	Brain	DLPFC	10X 3' v2	male	610.108	275.09	AD	-0.403574	3000	1000	16_syn18485175_cleaned_filtered
Astrocyte	Non-degenerative	73	GSE160936	A127_11	0.519143	0.231258	1.56105	3082	16	3066	Non-disease control	4120.5	13133.5	1942.5	4006.5	2.7654	1.47746	1.48801	4.72472	2.76875	-0.0390591	-0.0377074	19.9768	6.54664	0.014419	single-nuclei	Brain	SSC EC	10X 3' v3	male	680.985	276.875	Control	0.120958	3000	1000	A127_11_GSE160936_cleaned_filtered
Astrocyte	Non-degenerative	79	GSE178265	pPDsHSrSNxi3298	3.89972	0.224166	-1.07219	359	14	345	Control	4273	4291	2023.5	2043	2.45158	1.83808	1.53252	2.56812	1.73333	0.0225901	0.0172089	5.15362	3.22899	0.0102303	single-nuclei	Brain	Substantia nigra pars compacta	10X 3' v3	male	324.928	173.333	Control	-0.983341	3000	1000	pPDsHSrSNxi3298_GSE178265_cleaned_filtered
OPC	Non-degenerative	47	GSE178265	pPDCN4340	1.17073	0.223677	0.329885	1025	12	1013	Control	5687	6006	2925	3023	3.07519	1.55649	1.41514	2.60711	2.10661	-0.000680491	-0.0290846	13.8875	4.96347	0.0585296	single-nuclei	Brain	Caudate nucleus	10X 3' v3	male	514.511	210.661	Control	1.2111	3000	1000	pPDCN4340_GSE178265_cleaned_filtered
Microglia	Non-degenerative	47	GSE178265	pPDCN4340	3.35821	0.221816	-0.908185	536	18	518	Control	3340	3538.5	2065	2145.5	2.63988	2.5934	2.60362	4.82819	3.00386	0.0872644	0.0805294	5.26448	3.37066	0.0214112	single-nuclei	Brain	Caudate nucleus	10X 3' v3	male	347.104	300.386	Control	-0.320732	3000	1000	pPDCN4340_GSE178265_cleaned_filtered
Oligodendrocyte	Non-degenerative	79	GSE178265	pPDsHSrSNxi3298	1.05566	0.212446	0.449956	1042	11	1031	Control	6592	9070	2571	3259	3.07503	1.40279	0.693497	3.10475	2.25024	-0.00030855	-0.0321756	19.7614	5.23569	0.0572762	single-nuclei	Brain	Substantia nigra pars compacta	10X 3' v3	male	530.747	225.024	Control	1.21053	3000	1000	pPDsHSrSNxi3298_GSE178265_cleaned_filtered
OPC	Non-degenerative	79	GSE178265	pPDsHSrSNxi3298	1.04962	0.209974	0.454345	1048	11	1037	Control	6592	9111	2571	3264	3.07784	1.40141	0.693497	3.11283	2.25844	-0.000178005	-0.0321756	19.7811	5.24108	0.0573596	single-nuclei	Brain	Substantia nigra pars compacta	10X 3' v3	male	531.34	225.844	Control	1.22043	3000	1000	pPDsHSrSNxi3298_GSE178265_cleaned_filtered
Neuron	PD	79	GSE157783	IPD5	0.75188	0.20206	0.892088	266	2	264	IPD	3863	10901.5	1710.5	3830	2.93729	1.19296	0	2.90152	1.84848	-0.0457426	-0.0888852	21.3523	5.83712	0.125271	single-nuclei	Brain	Midbrain	10X 3' v3	male	590.53	184.848	PD	0.725834	3000	1000	IPD5_GSE157783_cleaned_filtered
OPC	Non-degenerative	80	GSE174332	191114_PN_322_snRNA-F5	1.51515	0.198623	-0.0106793	132	2	130	Control	6003.5	5496	2841.5	2723.5	3.08537	1.11015	0.701166	1.49231	1.28462	-0.016647	-0.0419661	11.9462	4.30769	0.0324276	single-nuclei	Brain	Motor cortex	10X 3' v3	male	468.462	128.462	Control	1.24693	3000	1000	191114_PN_322_snRNA-F5_GSE174332_cleaned_filtered
Astrocyte	Non-degenerative	70	GSE152058	4308	1.04031	0.196316	0.449	769	8	761	Control	10885.5	9229	3675	3515	2.55321	1.46779	1.34045	3.46255	2.38108	-0.00740368	-0.014518	12.0986	5.19317	0.0780825	single-nuclei	Brain	Caudate Putamen	10X 3' v3	male	530.618	238.108	Control	-0.625704	3000	1000	4308_GSE152058_cleaned_filtered
Neuron	Non-degenerative	69	GSE157760	A	0.357427	0.1899	2.12083	2518	9	2509	Control	3961	19906	2263	5937	2.51771	1.36676	1.9257	6.01116	3.76564	-0.0524063	0.0242996	23.212	6.8067	0.0135055	single-nuclei	Brain	Cortex	10X 3' v3	male	756.676	376.564	Control	-0.750637	3000	1000	A_GSE157760_cleaned_filtered
Oligodendrocyte	Non-degenerative	47	GSE178265	pPDCN4340	1.23596	0.189578	0.226772	890	11	879	Control	5662	5777	2897	2970	3.08372	1.53736	1.46621	2.33333	1.94881	-0.00425073	-0.0271098	13.3094	4.82708	0.0577456	single-nuclei	Brain	Caudate nucleus	10X 3' v3	male	500.569	194.881	Control	1.24112	3000	1000	pPDCN4340_GSE178265_cleaned_filtered
Neuron	Non-degenerative	4	PRJNA530977	6032_AMY	0.607903	0.184989	1.16341	658	4	654	Control	5203.5	10686	2376	3983	2.92761	1.21486	0.73106	3.20031	2.28899	-0.0182406	0.00261729	24.3578	6.05046	0.0647497	single-nuclei	Brain	Amygdala	10X 3' v2	male	627.217	228.899	Control	0.691778	3000	1000	6032_AMY_PRJNA530977_cleaned_filtered
OPC	Other dementias	74	GSE174332	191113_FTLD_218_snRNA-H4	1.65289	0.181784	-0.125461	121	2	119	FTLD	5435	5204	2397	2397	3.07964	1.24567	1.29184	1.43697	1.16807	-0.0073038	-0.00128101	11.7395	4.2437	0.0353482	single-nuclei	Brain	Motor cortex	10X 3' v3	male	452.941	116.807	LBD/FTLD	1.22674	3000	1000	191113_FTLD_218_snRNA-H4_GSE174332_cleaned_filtered
OPC	Other dementias	66	GSE174332	191113_FTLD_216_snRNA-H3	1.41509	0.181095	0.0562537	212	3	209	FTLD	4399	5403	2012	2441	3.13156	1.1806	0	1.50239	1.19139	-0.00974408	-0.0703251	12.4593	4.50239	0.037309	single-nuclei	Brain	Motor cortex	10X 3' v3	male	477.512	119.139	LBD/FTLD	1.40948	3000	1000	191113_FTLD_216_snRNA-H3_GSE174332_cleaned_filtered
Neuron	Non-degenerative	80	GSE173731	4294	0.307692	0.177999	2.38547	2275	7	2268	Pancreatic cancer	3376	26918.5	1529	6184	3.01084	1.20376	0	6.39109	7.6433	-0.0143889	-0.0224341	51.6208	7.6433	0.117581	single-nuclei	Brain	Caudate Putamen	10X 3' v3	male	792.46	382.672	Pancreatic cancer	0.984656	3000	1000	4294_GSE173731_cleaned_filtered
OPC	Non-degenerative	59	GSE178265	pPDCN3839	1.11576	0.172628	0.334177	717	8	709	Control	3340	6727	2075	3341	3.02315	1.68148	1.38481	3.02821	2.45839	0.00821329	0.00234305	13.1255	4.99859	0.0535579	single-nuclei	Brain	Caudate nucleus	10X 3' v3	male	515.092	245.839	Control	1.02797	3000	1000	pPDCN3839_GSE178265_cleaned_filtered
Pericyte	Other dementias	67	GSE173731	4494	1.22699	0.166974	0.213378	163	2	161	Dementia	3721	6090	1938	2678	2.63595	1.6484	0	4.7764	4.93789	0.013403	-0.0707591	12.7019	4.93789	0.0304898	single-nuclei	Brain	Caudate Putamen	10X 3' v3	male	498.758	242.857	Dementia	-0.334576	3000	1000	4494_GSE173731_cleaned_filtered
Astrocyte	AD	83	GSE183068	GSM5550451	0.771775	0.166082	0.792024	907	7	900	AD	5103	10865.5	2323	3600.5	2.5976	1.68334	1.66356	4.93889	5.68778	0.0316266	0.00139417	13.8033	5.68778	-0.0136059	single-nuclei	Brain	PFC	10X 3' v3	male	577	294.778	AD	-0.469521	3000	1000	GSM5550451_GSE183068_cleaned_filtered
Astrocyte	ALS	76	GSE174332	191112_ALS_126_snRNA-A6	2.34375	0.158184	-0.53474	128	3	125	ALS	4055	5417	2231	2609	2.61865	1.55612	1.28492	2.232	1.792	0.00898846	0.0449136	7.04	3.896	0.0148062	single-nuclei	Brain	Motor cortex	10X 3' v3	male	397.6	179.2	ALS	-0.395426	3000	1000	191112_ALS_126_snRNA-A6_GSE174332_cleaned_filtered
Oligodendrocyte	PD	82	GSE178265	pPDsHSrSNxi3887	0.533808	0.156348	1.28096	562	3	559	PD	5296	11187	2515	4463	2.88686	1.63988	1.23316	4.85868	3.38998	0.00545035	-0.0260459	18.814	6.28444	0.0396064	single-nuclei	Brain	Substantia nigra pars compacta	10X 3' v3	male	643.113	338.998	PD	0.548364	3000	1000	pPDsHSrSNxi3887_GSE178265_cleaned_filtered
OPC	PD	82	GSE178265	pPDsHSrSNxi3887	0.529101	0.152044	1.28207	567	3	564	PD	5296	11184.5	2515	4468	2.8864	1.64368	1.23316	4.85638	3.39007	0.00536603	-0.0260459	18.8138	6.28369	0.0395644	single-nuclei	Brain	Substantia nigra pars compacta	10X 3' v3	male	643.262	339.007	PD	0.546757	3000	1000	pPDsHSrSNxi3887_GSE178265_cleaned_filtered
Neuron	AD	83	GSE160936	A163_17	0.319489	0.148144	2.09753	313	1	312	AD	5612	10869	1572	3850	3.02796	1.08705	1.02313	2.61859	1.875	-0.0991325	-0.0543577	22.9776	6.96154	0.0375161	single-nuclei	Brain	SSC EC	10X 3' v3	male	753.526	187.5	AD	1.04491	3000	1000	A163_17_GSE160936_cleaned_filtered
Astrocyte	HD	65	GSE152058	3881	0.893855	0.14808	0.576919	895	8	887	HD	10950.5	11405	3533.5	3682	2.48788	1.7329	1.66456	5.54904	3	0.0273828	-0.000281458	13.5085	5.3867	0.0696458	single-nuclei	Brain	Putamen Caudate	10X 3' v3	male	547.914	300	HD	-0.855597	3000	1000	3881_GSE152058_cleaned_filtered
Pericyte	Non-degenerative	17	GSE173731	E361	0.352113	0.144229	1.89767	284	1	283	Epilepsy, temporal sclerosis	3175	10667	1697	4650	2.43419	1.81548	1.42301	6.49823	5.71378	-0.0284908	-0.0260797	12.6926	5.71378	0.0726172	single-nuclei	Brain	Temporal lobe	10X 3' v3	male	726.502	386.219	Epilepsy, temporal sclerosis	-1.04455	3000	1000	E361_GSE173731_cleaned_filtered
OPC	AD	90	GSE167494	GSM5106122	1.03627	0.141899	0.389062	193	2	191	AD	6074	6781	3113.5	3265	2.9825	1.63888	1.221	3.1623	5.04712	0.0172656	-0.033052	14.7801	5.04712	0.0530056	single-nuclei	Brain	DLPFC	10X 3' v3	male	522.513	229.319	AD	0.884929	3000	1000	GSM5106122_GSE167494_cleaned_filtered
Neuron	Other dementias	67	GSE173731	4494	0.417246	0.141782	1.60665	2876	12	2864	Dementia	5098	19796.5	2041.5	4847.5	2.87896	1.10843	0	4.66899	6.79399	-0.0173032	-0.0211122	37.6823	6.79399	0.0756643	single-nuclei	Brain	Caudate Putamen	10X 3' v3	male	687.151	264.944	Dementia	0.520566	3000	1000	4494_GSE173731_cleaned_filtered
Microglia	Non-degenerative	NA	GSE164485	NPBB052	1.96078	0.125242	-0.354289	153	3	150	Control	6484	5753.5	2608	2298	2.91008	2.26285	1.88267	5.99333	2.86667	0.105963	0.0188712	10.5133	4.15333	0.182093	single-nuclei	Brain	Brain	10X 3' v3	male	422	286.667	Control	0.630068	3000	1000	NPBB052_GSE164485_cleaned_filtered
Neuron	Other dementias	74	GSE178265	pPDsHSrSNxi2569	0.305111	0.119047	2.01233	1311	4	1307	LBD	5605.5	17918	2974	5680	2.76327	1.29369	0.338225	4.99847	3.40551	-0.0312591	-0.0696161	27.8868	7.23259	0.0369553	single-nuclei	Brain	Substantia nigra pars compacta	10X 3' v3	male	742.005	340.551	LBD/FTLD	0.113485	3000	1000	pPDsHSrSNxi2569_GSE178265_cleaned_filtered
Neuron	Non-degenerative	11	PRJNA530977	4334_AMY	0.833333	0.118209	0.62031	240	2	238	Control	4504	10265.5	2209.5	3872.5	2.76598	1.16529	1.70229	2.63866	2.01261	-0.024013	0.00229175	17.2563	5.42017	0.0110113	single-nuclei	Brain	Amygdala	10X 3' v2	male	553.782	201.261	Control	0.12301	3000	1000	4334_AMY_PRJNA530977_cleaned_filtered
Astrocyte	Non-degenerative	75	GSE183068	GSM5550503	0.721154	0.0984309	0.763355	416	3	413	Normal	7335	10105	3101	3479	2.57838	1.82984	0.895835	6.43341	5.63196	0.0543909	-0.00588437	15.4092	5.63196	-0.00834683	single-nuclei	Brain	PFC	10X 3' v3	male	573.123	322.276	Control	-0.537137	3000	1000	GSM5550503_GSE183068_cleaned_filtered
Neuron	PD	67	GSE189202	GSM5696061	0.275482	0.0979291	2.06073	1452	4	1448	GBA N370S/WT - heterozygous for GBA	5115	23425.5	1822	5676.5	2.82266	1.08679	0.504096	5.07804	7.31423	-0.0304177	-0.0475236	40.2058	7.31423	0.0468239	single-nuclei	Brain	Cingulate gyrus	10X 3' v3	male	748.55	312.155	PD	0.322464	3000	1000	GSM5696061_GSE189202_cleaned_filtered
Astrocyte	Non-degenerative	11	GSE173731	E337	0.636943	0.0965529	0.909973	157	1	156	Epilepsy	4218	12802.5	2189	4646	2.35653	2.29357	2.34977	12.2885	5.07051	0.0592411	0.124847	12.5321	5.07051	0.00785129	single-nuclei	Brain	Temporal lobe	10X 3' v3	male	592.949	469.872	Epilepsy	-1.31782	3000	1000	E337_GSE173731_cleaned_filtered
Astrocyte	AD	81	GSE183068	GSM5550466	1.39535	0.0782049	-0.0111623	430	6	424	AD	4073	6823.5	2005	2743.5	2.6353	1.79741	1.73601	4.18868	4.64387	0.0452544	0.0522118	10.4458	4.64387	-0.0140934	single-nuclei	Brain	PFC	10X 3' v3	male	468.396	234.906	AD	-0.336837	3000	1000	GSM5550466_GSE183068_cleaned_filtered
Astrocyte	Non-degenerative	NA	GSE164485	NPBB138	0.645161	0.0702259	0.845906	775	5	770	Control	6306	12069.5	2152	4015	2.60442	1.47517	1.18405	4.33896	2.93247	0.00798266	0.0556425	15.4312	5.66883	0.149363	single-nuclei	Brain	Brain	10X 3' v3	male	584.286	293.247	Control	-0.44551	3000	1000	NPBB138_GSE164485_cleaned_filtered
Neuron	Non-degenerative	NA	GSE164485	NPBB139	0.646766	0.0680735	0.839171	2010	13	1997	Control	4563	11045	1794	3685	2.8374	0.95247	1.15541	2.17526	1.61492	-0.0507013	-0.0356423	20.7431	5.77416	0.197297	single-nuclei	Brain	Brain	10X 3' v3	male	583.375	161.492	Control	0.37433	3000	1000	NPBB139_GSE164485_cleaned_filtered
OPC	Non-degenerative	NA	GSE164485	NPBB052	0.925926	0.0487917	0.409182	108	1	107	Control	4119	7405	1970	2885	3.21654	1.12418	0	2.25234	1.71028	-0.0170042	-0.0840217	21.0748	5.20561	0.247365	single-nuclei	Brain	Brain	10X 3' v3	male	525.234	171.028	Control	1.7085	3000	1000	NPBB052_GSE164485_cleaned_filtered
Neuron	Non-degenerative	94	GSE157760	C	0.229463	0.0476853	2.03642	2179	5	2174	Control	4123	18954.5	2307	5662	2.69395	1.31932	0.751302	5.49126	3.42042	-0.0556821	-0.0373297	26.6605	6.78611	0.0195161	single-nuclei	Brain	Cortex	10X 3' v3	male	745.262	342.042	Control	-0.130458	3000	1000	C_GSE157760_cleaned_filtered
Astrocyte	Non-degenerative	80	GSE152058	4294	1.13879	0.0354684	0.171984	1405	16	1389	Control	5945.5	7851	2607.5	3171	2.60472	1.72236	1.43871	4.18575	2.57523	0.0224426	-0.026027	10.8157	4.84449	0.0778174	single-nuclei	Brain	Putamen Caudate	10X 3' v3	male	493.161	257.523	Control	-0.444469	3000	1000	4294_GSE152058_cleaned_filtered
Microglia	PD	67	GSE189202	GSM5696061	2.15827	0.0323885	-0.506115	278	6	272	GBA N370S/WT - heterozygous for GBA	6426.5	5565	2516.5	2425	2.65269	2.06487	1.48227	4.44853	3.99265	0.0641706	-0.050899	8.12868	3.99265	0.0395522	single-nuclei	Brain	Cingulate gyrus	10X 3' v3	male	401.471	276.838	PD	-0.275669	3000	1000	GSM5696061_GSE189202_cleaned_filtered
OPC	Non-degenerative	90	GSE167494	GSM5106119	0.571429	0.0294129	0.906867	175	1	174	Non-symptomatic	12184	9583	4152	3642.5	3.21158	1.34149	0.971346	3	5.79885	-0.00349477	-0.0504708	23.6092	5.79885	0.0807356	single-nuclei	Brain	DLPFC	10X 3' v3	male	592.529	226.437	Control	1.69105	3000	1000	GSM5106119_GSE167494_cleaned_filtered
Microglia	AD	79	GSE183068	GSM5550480	1.21951	0.0182918	0.0840888	492	6	486	AD/CAA	5106	5969	2434	2542.5	3.02027	2.20085	1.5255	5.47325	4.76337	0.088597	-0.00267964	13.179	4.76337	0.0407945	single-nuclei	Brain	PFC	10X 3' v3	male	481.276	300.617	AD	1.01785	3000	1000	GSM5550480_GSE183068_cleaned_filtered
OPC	AD	77	GSE183068	GSM5550495	0.292398	0.0168267	1.60625	342	1	341	AD	17812	13176	4120	4038	3.21532	1.29503	0.445595	3.87097	6.72434	-0.00604642	-0.0775635	33.9443	6.72434	0.041785	single-nuclei	Brain	PFC	10X 3' v3	male	687.097	267.449	AD	1.70419	3000	1000	GSM5550495_GSE183068_cleaned_filtered
Neuron	ALS	76	GSE174332	191112_ALS_126_snRNA-A6	0.170358	0.0125343	2.18252	587	1	586	ALS	27054	18588.5	6703	6214.5	2.8954	1.14519	0.314541	4.3157	3.08362	0.00301827	-0.0531924	32.1041	7.38225	0.0259843	single-nuclei	Brain	Motor cortex	10X 3' v3	male	765.017	308.362	ALS	0.578431	3000	1000	191112_ALS_126_snRNA-A6_GSE174332_cleaned_filtered
Neuron	Non-degenerative	79	GSE174367	GSM5292854	1.1554	0.00882863	0.132228	1731	20	1711	Control	5604	6299	2210	2602	2.89947	0.965216	1.15886	1.3197	1.06371	-0.0389193	-0.0267247	12.654	4.84278	0.12966	single-nuclei	Brain	Frontal cortex	10X 3' v3	male	487.785	106.371	Control	0.592732	3000	1000	GSM5292854_GSE174367_cleaned_filtered
Astrocyte	Non-degenerative	77	GSE160936	A053_11	0.381679	0.00519693	1.28365	4454	17	4437	Non-disease control	4930	12597	2166	3749	2.72503	1.59859	1.56138	5.34956	2.91526	-0.0217332	-0.0284731	18.8612	6.22312	0.0119657	single-nuclei	Brain	SSC EC	10X 3' v3	male	643.475	291.526	Control	-0.021085	3000	1000	A053_11_GSE160936_cleaned_filtered
Astrocyte	AD	95	GSE157827	AD10	1.85185	0	-1.21469	162	3	159	AD	3474	3637	2034	1970	2.4702	1.46352	1.97966	1.71698	1.44025	0.0227325	0.0783331	4.43396	3.03145	0.0152681	single-nuclei	Brain	Prefrontal cortex	10X 3' v3	male	305.66	144.025	AD	-0.917815	3000	1000	AD10_GSE157827_cleaned_filtered
Neuron	AD	95	GSE157827	AD10	0.2	0	-0.0179757	5000	10	4990	AD	3431.5	5643.5	2036	2803.5	2.72495	1.17465	1.36136	1.52164	1.31583	-0.00787654	0.00637025	9.31603	4.65391	0.046827	single-nuclei	Brain	Prefrontal cortex	10X 3' v3	male	467.475	131.583	AD	-0.0213826	3000	1000	AD10_GSE157827_cleaned_filtered
Oligodendrocyte	AD	95	GSE157827	AD10	3.80952	0	-1.44693	105	4	101	AD	3770.5	3531	2008	1884	2.49898	1.27184	1.30183	0.90099	0.841584	-0.00504097	-0.00613083	4.35644	2.70297	0.00661475	single-nuclei	Brain	Prefrontal cortex	10X 3' v3	male	274.257	84.1584	AD	-0.816556	3000	1000	AD10_GSE157827_cleaned_filtered
OPC	AD	95	GSE157827	AD10	1.43541	0	-0.448779	209	3	206	AD	4384	3777.5	2139	2019.5	3.07859	1.38201	1.84157	1.49515	1.31553	0.0197381	0.0926782	9.71845	4.07767	0.0965185	single-nuclei	Brain	Prefrontal cortex	10X 3' v3	male	409.223	131.553	AD	1.22307	3000	1000	AD10_GSE157827_cleaned_filtered
Astrocyte	Non-degenerative	94	GSE157760	C	1.50044	0	-0.25258	1133	17	1116	Control	4265	7070	2233	3298.5	2.40343	1.95373	1.91239	4.78047	3.16846	0.0295908	0.0340289	7.74014	4.1819	0.00247021	single-nuclei	Brain	Cortex	10X 3' v3	male	435.753	316.846	Control	-1.15279	3000	1000	C_GSE157760_cleaned_filtered
Astrocyte	Non-degenerative	94	GSE167494	GSM5106101	0.190295	0	0.375553	3153	6	3147	Non-symptomatic	3616	9216	1990	3803	2.52011	1.6556	2.05318	4.17382	5.01779	0.0175056	0.0520342	10.9924	5.01779	0.0907316	single-nuclei	Brain	DLPFC	10X 3' v3	male	520.686	305.497	Control	-0.742181	3000	1000	GSM5106101_GSE167494_cleaned_filtered
Oligodendrocyte	Non-degenerative	94	GSE167494	GSM5106101	1.38293	0	-0.862093	2097	29	2068	Non-symptomatic	4509	6298.5	2233	2717	2.45284	1.31671	1.29484	2.0353	3.41151	-0.0137888	0.00488022	7.52756	3.41151	0.0704711	single-nuclei	Brain	DLPFC	10X 3' v3	male	353.337	164.458	Control	-0.978903	3000	1000	GSM5106101_GSE167494_cleaned_filtered
Neuron	Non-degenerative	93	GSE157827	NC3	0.847035	0	-0.117482	2007	17	1990	None	3823	5677	2055	2734	2.70067	1.12259	1.23174	1.49246	1.25477	-0.0102412	-0.0160891	9.47789	4.50704	0.0397273	single-nuclei	Brain	Prefrontal cortex	10X 3' v3	male	454.02	125.477	Control	-0.106825	3000	1000	NC3_GSE157827_cleaned_filtered
OPC	Non-degenerative	93	GSE157827	NC3	0.537634	0	-0.0552679	372	2	370	None	5633	4373	2439.5	2185.5	3.07336	1.28843	0	1.51622	1.22703	0.00699139	-0.0798565	11.1784	4.6	0.111371	single-nuclei	Brain	Prefrontal cortex	10X 3' v3	male	462.432	122.703	Control	1.20464	3000	1000	NC3_GSE157827_cleaned_filtered
Astrocyte	AD	91	GSE183068	GSM5550450	0.0712251	0	1.07703	1404	1	1403	AD	4059	16978	2167	4734	2.58126	1.65806	1.24233	7.28225	6.03207	0.0257629	-0.0250735	20.6607	6.03207	-0.0260611	single-nuclei	Brain	PFC	10X 3' v3	male	615.538	391.019	AD	-0.527024	3000	1000	GSM5550450_GSE183068_cleaned_filtered
Neuron	AD	91	GSE183068	GSM5550450	0.125628	0	0.830025	796	1	795	AD	3595	10786	1735	3727	2.75378	1.22576	0	3.28679	5.71572	-0.024119	-0.0796677	20.483	5.71572	-0.00357006	single-nuclei	Brain	PFC	10X 3' v3	male	582.138	212.327	AD	0.0800911	3000	1000	GSM5550450_GSE183068_cleaned_filtered
Oligodendrocyte	AD	91	GSE183068	GSM5550450	0.729517	0	-0.543747	1782	13	1769	AD	4049	9051	1963	3057	2.47464	1.32907	1.79155	2.88412	3.79932	0.00591195	0.0510977	10.8892	3.79932	-0.0364037	single-nuclei	Brain	PFC	10X 3' v3	male	396.382	210.288	AD	-0.902199	3000	1000	GSM5550450_GSE183068_cleaned_filtered
Astrocyte	Non-degenerative	90	GSE157827	NC7	1.16732	0	-0.907151	257	3	254	None	3922	4420.5	2082	2258.5	2.51888	1.78806	2.15746	2.61417	1.87402	0.0444324	0.0915165	5.73228	3.44094	0.031311	single-nuclei	Brain	Prefrontal cortex	10X 3' v3	male	347.244	187.402	Control	-0.746534	3000	1000	NC7_GSE157827_cleaned_filtered
Neuron	Non-degenerative	90	GSE157827	NC7	0.370714	0	0.612638	2158	8	2150	None	4178	8173	2170	3514	2.76976	1.17923	0	2.06884	1.68233	-0.00823137	-0.0401243	12.8474	5.49442	0.060468	single-nuclei	Brain	Prefrontal cortex	10X 3' v3	male	552.744	168.233	Control	0.136312	3000	1000	NC7_GSE157827_cleaned_filtered
Oligodendrocyte	Non-degenerative	90	GSE157827	NC7	2.66667	0	-1.35786	225	6	219	None	3155	3434	1783	1912	2.56145	1.38055	1.67172	1.23288	1.11872	0.0112011	0.0234538	4.73059	2.82192	0.0133571	single-nuclei	Brain	Prefrontal cortex	10X 3' v3	male	286.301	111.872	Control	-0.596729	3000	1000	NC7_GSE157827_cleaned_filtered
Astrocyte	AD	90	GSE174367	GSM5292848	1.0989	0	-0.997702	182	2	180	AD	3039.5	4232	1714	2135	2.50731	1.5066	2.2056	1.99444	1.57778	-0.00093905	0.0704163	5.43889	3.32778	0.0628228	single-nuclei	Brain	Frontal cortex	10X 3' v3	male	335	157.778	AD	-0.787249	3000	1000	GSM5292848_GSE174367_cleaned_filtered
Astrocyte	AD	90	GSE174367	GSM5292849	3.01508	0	-0.868568	796	24	772	AD	4112.5	4256.5	2132	2161	2.56543	1.84886	1.60904	2.79016	2.09067	0.037587	0.00201832	5.71762	3.50648	0.0695081	single-nuclei	Brain	Frontal cortex	10X 3' v3	male	352.461	209.067	AD	-0.582721	3000	1000	GSM5292849_GSE174367_cleaned_filtered
Neuron	AD	90	GSE174367	GSM5292848	0.333651	0	0.810744	2098	7	2091	AD	3541	10046	1737	3732	2.90609	1.10487	0.532675	2.18317	1.65997	-0.0405404	-0.0497707	17.6495	5.73984	0.13246	single-nuclei	Brain	Frontal cortex	10X 3' v3	male	579.531	165.997	AD	0.616052	3000	1000	GSM5292848_GSE174367_cleaned_filtered
Neuron	AD	90	GSE174367	GSM5292849	0	0	0.777909	2188	0	2188	AD		9458.5		3736.5	2.94432	1.333		2.99086	2.09415	-0.0250306		17.862	5.67733	0.133852	single-nuclei	Brain	Frontal cortex	10X 3' v3	male	575.091	209.415	AD	0.750583	3000	1000	GSM5292849_GSE174367_cleaned_filtered
Oligodendrocyte	AD	90	GSE174367	GSM5292848	2.59422	0	-1.64788	2043	53	1990	AD	3340	3465	1648	1732	2.43365	1.28587	1.33282	0.959799	0.856281	-0.00189798	0.0036882	4.08543	2.45427	0.0455855	single-nuclei	Brain	Frontal cortex	10X 3' v3	male	247.085	85.6281	AD	-1.04645	3000	1000	GSM5292848_GSE174367_cleaned_filtered
Oligodendrocyte	AD	90	GSE174367	GSM5292849	4.30797	0	-1.46906	1091	47	1044	AD	3467	3514.5	1684	1739	2.58544	1.83968	1.41024	2.02395	1.54598	0.0518764	0.0194546	4.83429	2.68582	0.0641354	single-nuclei	Brain	Frontal cortex	10X 3' v3	male	271.264	154.598	AD	-0.512288	3000	1000	GSM5292849_GSE174367_cleaned_filtered
Oligodendrocyte	Non-degenerative	90	GSE174367	GSM5292852	2.89898	0	-1.41623	6830	198	6632	Control	3483.5	3995	1657	1835	2.51619	1.32527	1.35482	1.42762	1.14294	0.0130746	0.0173202	5.10012	2.77081	0.0580079	single-nuclei	Brain	Frontal cortex	10X 3' v3	male	278.408	114.294	Control	-0.755998	3000	1000	GSM5292852_GSE174367_cleaned_filtered
OPC	Non-degenerative	90	GSE174367	GSM5292852	0	0	-0.0312654	236	0	236	Control		4734		2230	3.31534	1.48633		2.00847	1.55085	0.0120331		12.9831	4.65254	0.179038	single-nuclei	Brain	Frontal cortex	10X 3' v3	male	465.678	155.085	Control	2.05617	3000	1000	GSM5292852_GSE174367_cleaned_filtered
Astrocyte	PD	90	GSE178265	pPDsHSrSNxi2142	2.15517	0	-0.819981	232	5	227	PD	3534	4280	1999	2229	2.59348	1.89842	1.37832	2.82379	2.03524	0.0236304	-0.0202837	6.01322	3.56388	0.0187699	single-nuclei	Brain	Substantia nigra pars compacta	10X 3' v3	male	359.031	203.524	PD	-0.484013	3000	1000	pPDsHSrSNxi2142_GSE178265_cleaned_filtered
Neuron	Non-degenerative	90	syn18485175	19	0.147929	0	0.694786	676	1	675	Control	3763	8862	2223	3944	2.68915	1.45264	1.29677	3.33926	2.44296	-0.000934363	-0.0146834	13.4341	5.53185	0.118644	single-nuclei	Brain	DLPFC	10X 3' v2	male	563.852	244.296	Control	-0.147362	3000	1000	19_syn18485175_cleaned_filtered
Astrocyte	Non-degenerative	90	GSE167494	GSM5106098	1.74611	0	-0.520188	2119	37	2082	Non-symptomatic	3690	6252.5	2025	2959.5	2.42012	1.8372	1.90863	3.69789	3.90922	0.0343964	0.035382	7.22478	3.90922	0.0718259	single-nuclei	Brain	DLPFC	10X 3' v3	male	399.568	252.882	Control	-1.09404	3000	1000	GSM5106098_GSE167494_cleaned_filtered
Astrocyte	Non-degenerative	90	GSE167494	GSM5106099	1.09589	0	-0.225061	1460	16	1444	Non-symptomatic	3573	7437.5	1991.5	3299	2.4135	1.8384	1.92273	4.2777	4.28878	0.0375041	0.0737338	8.31302	4.28878	0.0749129	single-nuclei	Brain	DLPFC	10X 3' v3	male	439.474	288.504	Control	-1.11737	3000	1000	GSM5106099_GSE167494_cleaned_filtered
Astrocyte	Non-degenerative	90	GSE167494	GSM5106119	0.45977	0	-0.291537	435	2	433	Non-symptomatic	4640	7517	2200	3221	2.45625	1.86975	2.28665	4.27021	4.21247	0.054937	0.107489	8.32333	4.21247	-0.0111955	single-nuclei	Brain	DLPFC	10X 3' v3	male	430.485	285.681	Control	-0.966923	3000	1000	GSM5106119_GSE167494_cleaned_filtered
Astrocyte	AD	90	GSE167494	GSM5106122	1.45985	0	-0.500556	411	6	405	AD	4150	6294	2339.5	2992	2.31974	1.9715	2.30191	4.41235	3.95802	0.0655695	0.0792618	6.94321	3.95802	-0.0227513	single-nuclei	Brain	DLPFC	10X 3' v3	male	402.222	303.951	AD	-1.44729	3000	1000	GSM5106122_GSE167494_cleaned_filtered
Neuron	Non-degenerative	90	GSE167494	GSM5106098	0.757576	0	-0.454891	132	1	131	Non-symptomatic	3977	4437	2017	2074	2.60949	0.744302	0	1.19847	4.05344	-0.0514733	-0.0864747	8.14504	4.05344	0.101914	single-nuclei	Brain	DLPFC	10X 3' v3	male	408.397	89.313	Control	-0.42769	3000	1000	GSM5106098_GSE167494_cleaned_filtered
Neuron	Non-degenerative	90	GSE167494	GSM5106118	0	0	1.34506	2642	0	2642	Non-symptomatic		11918.5		4157.5	2.78506	1.17803		3.5564	6.41597	-0.0235074		23.5163	6.41597	0.0161806	single-nuclei	Brain	DLPFC	10X 3' v3	male	651.779	234.974	Control	0.190163	3000	1000	GSM5106118_GSE167494_cleaned_filtered
Neuron	Non-degenerative	90	GSE167494	GSM5106119	0	0	0.654947	443	0	443	Non-symptomatic		7932		3149	2.85578	1.20181		2.76975	5.48081	-0.0123242		17.5801	5.48081	0.0243684	single-nuclei	Brain	DLPFC	10X 3' v3	male	558.465	183.973	Control	0.438998	3000	1000	GSM5106119_GSE167494_cleaned_filtered
Neuron	AD	90	GSE167494	GSM5106121	0.0715308	0	2.27739	2796	2	2794	AD	22310.5	22087	6377.5	6399	2.71689	1.25064	0.465919	5.85147	7.56943	-0.0254734	-0.0932089	32.665	7.56943	0.00694857	single-nuclei	Brain	DLPFC	10X 3' v3	male	777.845	378.418	AD	-0.0497499	3000	1000	GSM5106121_GSE167494_cleaned_filtered
Neuron	AD	90	GSE167494	GSM5106122	0.107759	0	2.11892	928	1	927	AD	3516	21961	1561	6372	2.80718	1.30103	0	5.97843	7.32255	-0.0206376	-0.0655191	34.3236	7.32255	0.023348	single-nuclei	Brain	DLPFC	10X 3' v3	male	756.419	363.754	AD	0.267976	3000	1000	GSM5106122_GSE167494_cleaned_filtered
Oligodendrocyte	Non-degenerative	90	GSE167494	GSM5106098	1.95122	0	-0.899647	205	4	201	Non-symptomatic	3190	5255	1737.5	2473	2.38258	1.38772	1.30247	2.00498	3.34328	-0.0115546	-0.0165706	6.95522	3.34328	0.0702525	single-nuclei	Brain	DLPFC	10X 3' v3	male	348.259	156.716	Control	-1.22615	3000	1000	GSM5106098_GSE167494_cleaned_filtered
Oligodendrocyte	Non-degenerative	90	GSE167494	GSM5106099	2.85714	0	-0.984651	140	4	136	Non-symptomatic	4287.5	6463	1998	2777.5	2.34	1.40945	1.26352	2.16176	3.25735	-0.0165275	-0.0142856	7.13971	3.25735	0.0614859	single-nuclei	Brain	DLPFC	10X 3' v3	male	336.765	168.382	Control	-1.37599	3000	1000	GSM5106099_GSE167494_cleaned_filtered
Oligodendrocyte	Non-degenerative	90	GSE167494	GSM5106119	2.29008	0	-0.992695	393	9	384	Non-symptomatic	4774	5867	2294	2602.5	2.34643	1.31035	1.80862	1.91927	3.22656	-0.00844355	0.0107884	6.38542	3.22656	-0.0286301	single-nuclei	Brain	DLPFC	10X 3' v3	male	335.677	153.125	Control	-1.35337	3000	1000	GSM5106119_GSE167494_cleaned_filtered
Oligodendrocyte	AD	90	GSE167494	GSM5106122	1.75747	0	-1.31344	569	10	559	AD	3269	4765	1909.5	2341	2.31629	1.50181	1.23892	2.06082	2.80143	0.0103004	-0.0129082	5.03399	2.80143	-0.0357923	single-nuclei	Brain	DLPFC	10X 3' v3	male	292.308	159.213	AD	-1.45943	3000	1000	GSM5106122_GSE167494_cleaned_filtered
Neuron	AD	89.7139	syn18485175	20	0	0	0.405345	263	0	263	AD		9345		3991	2.57343	1.43753		3.3308	2.44487	0.00295132		11.8745	5.1711	0.0964349	single-nuclei	Brain	DLPFC	10X 3' v2	male	524.715	244.487	AD	-0.554565	3000	1000	20_syn18485175_cleaned_filtered
Astrocyte	Other dementias	89	GSE174332	201025_FTLD_235_snRNA-C7	1.18577	0	-0.762524	253	3	250	FTLD	4625	4871	2232	2406.5	2.45204	1.38851	1.36082	1.812	1.424	-0.00179704	-0.000991014	5.752	3.588	0.00773685	single-nuclei	Brain	Motor cortex	10X 3' v3	male	366.8	142.4	LBD/FTLD	-0.981748	3000	1000	201025_FTLD_235_snRNA-C7_GSE174332_cleaned_filtered
Neuron	Other dementias	89	GSE174332	201025_FTLD_235_snRNA-C7	0	0	1.10484	114	0	114	FTLD		10143		3776.5	2.81928	0.982275		2.28947	1.71053	0.00433954		19.1579	6.00877	0.0282466	single-nuclei	Brain	Motor cortex	10X 3' v3	male	619.298	171.053	LBD/FTLD	0.310557	3000	1000	201025_FTLD_235_snRNA-C7_GSE174332_cleaned_filtered
Oligodendrocyte	Other dementias	89	GSE174332	201025_FTLD_235_snRNA-C7	2.06767	0	-0.930064	532	11	521	FTLD	3847	4635	2011	2260	2.52368	1.24145	1.22253	1.3071	1.13244	0.00123781	0.0116937	5.75048	3.34357	0.00962685	single-nuclei	Brain	Motor cortex	10X 3' v3	male	344.146	113.244	LBD/FTLD	-0.72962	3000	1000	201025_FTLD_235_snRNA-C7_GSE174332_cleaned_filtered
Astrocyte	AD	89	GSE167494	GSM5106109	0.415184	0	0.0595899	1686	7	1679	AD	3238	9506	1902	3748	2.48998	1.82538	1.40814	5.15009	4.66647	0.0389381	0.0148255	11.2692	4.66647	0.0808608	single-nuclei	Brain	DLPFC	10X 3' v3	male	477.963	318.88	AD	-0.848212	3000	1000	GSM5106109_GSE167494_cleaned_filtered
Neuron	AD	89	GSE167494	GSM5106109	0	0	0.96948	201	0	201	AD		10262		3722	2.84365	1.25857		3.49751	5.89055	-0.0354122		22.1443	5.89055	0.135364	single-nuclei	Brain	DLPFC	10X 3' v3	male	600.995	230.348	AD	0.396314	3000	1000	GSM5106109_GSE167494_cleaned_filtered
Oligodendrocyte	AD	89	GSE167494	GSM5106109	2.0903	0	-0.934452	1196	25	1171	AD	4058	6000	1942	2470	2.48449	1.51829	1.86264	2.80615	3.34244	0.0156105	0.0367563	8.38941	3.34244	0.0738927	single-nuclei	Brain	DLPFC	10X 3' v3	male	343.553	196.157	AD	-0.867527	3000	1000	GSM5106109_GSE167494_cleaned_filtered
Astrocyte	AD	89	GSE183068	GSM5550473	0.200401	0	0.484677	998	2	996	AD	6569.5	9430.5	2627	3512	2.62221	1.79557	0.391962	4.98594	5.29116	0.0476943	-0.0745121	12.3725	5.29116	-0.0149048	single-nuclei	Brain	PFC	10X 3' v3	male	535.442	323.996	AD	-0.382901	3000	1000	GSM5550473_GSE183068_cleaned_filtered
Neuron	AD	89	GSE183068	GSM5550473	0.0904568	0	2.27116	2211	2	2209	AD	4372	23259	2260	5794	2.83181	1.14173	1.46558	5.2517	7.57764	-0.0344422	-0.0508818	39.5518	7.57764	0.00441596	single-nuclei	Brain	PFC	10X 3' v3	male	777.003	339.656	AD	0.354653	3000	1000	GSM5550473_GSE183068_cleaned_filtered
Oligodendrocyte	AD	89	GSE183068	GSM5550473	2.91595	0	-1.36134	2915	85	2830	AD	4386	5125.5	2074	2222.5	2.38679	1.25536	1.13567	1.62332	2.79329	-0.00133963	-0.00384151	5.71802	2.79329	-0.045936	single-nuclei	Brain	PFC	10X 3' v3	male	285.83	131.519	AD	-1.21135	3000	1000	GSM5550473_GSE183068_cleaned_filtered
OPC	AD	89	GSE183068	GSM5550473	0	0	1.05599	260	0	260	AD		10695.5		3603.5	3.30793	1.4033		3.52692	6.01923	0.00621409		28.6038	6.01923	0.0373461	single-nuclei	Brain	PFC	10X 3' v3	male	612.692	255.769	AD	2.0301	3000	1000	GSM5550473_GSE183068_cleaned_filtered
Neuron	AD	88.4682	syn18485175	4	0	0	0.334463	575	0	575	AD		6475		3223	2.77299	1.43156		2.73739	2.03478	0.00339556		11.9496	5.08522	0.126655	single-nuclei	Brain	DLPFC	10X 3' v2	male	515.13	203.478	AD	0.147656	3000	1000	4_syn18485175_cleaned_filtered
Neuron	Non-degenerative	88.3997	syn18485175	3	0.547945	0	0.880628	365	2	363	Control	3505	10298	1989	4457	2.68624	1.48555	1.92969	3.72176	2.61433	-0.00158379	0.0336305	14.7025	5.78512	0.113153	single-nuclei	Brain	DLPFC	10X 3' v2	male	588.981	261.433	Control	-0.157597	3000	1000	3_syn18485175_cleaned_filtered
Oligodendrocyte	AD	88	GSE167494	GSM5106108	2.33661	0	-1.2109	2953	69	2884	AD	3878	5249.5	1910	2326.5	2.41895	1.25635	1.29542	1.61928	2.97538	-0.0155423	-0.00812344	6.21012	2.97538	0.065657	single-nuclei	Brain	DLPFC	10X 3' v3	male	306.172	132.49	AD	-1.09816	3000	1000	GSM5106108_GSE167494_cleaned_filtered
Astrocyte	AD	88	GSE183068	GSM5550472	0.877193	0	-0.641341	798	7	791	AD	3626	5932	1964	2751	2.37333	1.66045	1.10129	2.86473	3.79772	0.018911	-0.0269596	6.45006	3.79772	-0.0401477	single-nuclei	Brain	PFC	10X 3' v3	male	383.186	216.561	AD	-1.25872	3000	1000	GSM5550472_GSE183068_cleaned_filtered
Neuron	AD	88	GSE183068	GSM5550472	0.0408831	0	2.56737	2446	1	2445	AD	17909	25794	5277	6125	2.78891	1.10438	0.984	5.30634	7.96564	-0.0414308	-0.0510862	38.9431	7.96564	0.00151895	single-nuclei	Brain	PFC	10X 3' v3	male	817.055	340.818	AD	0.203678	3000	1000	GSM5550472_GSE183068_cleaned_filtered
Oligodendrocyte	AD	88	GSE183068	GSM5550472	2.84091	0	-1.28855	1760	50	1710	AD	4713.5	5949.5	2045.5	2415.5	2.2803	1.11646	1.11736	1.52281	2.86374	-0.014293	-0.012279	6.23567	2.86374	-0.0517546	single-nuclei	Brain	PFC	10X 3' v3	male	295.673	126.023	AD	-1.58607	3000	1000	GSM5550472_GSE183068_cleaned_filtered
OPC	AD	88	GSE183068	GSM5550472	0.344828	0	1.00307	290	1	289	AD	8636	10284	3173	3599	3.23024	1.32148	0.769156	3.16955	5.97232	-0.00464609	-0.0544193	27.3529	5.97232	0.0331668	single-nuclei	Brain	PFC	10X 3' v3	male	605.536	229.758	AD	1.75671	3000	1000	GSM5550472_GSE183068_cleaned_filtered
Neuron	Non-degenerative	87.9535	syn18485175	45	0	0	0.529378	646	0	646	Control		8136.5		3698	2.77057	1.42056		3.10062	2.25387	0.000265553		13.3251	5.34675	0.125846	single-nuclei	Brain	DLPFC	10X 3' v2	male	541.486	225.387	Control	0.139141	3000	1000	45_syn18485175_cleaned_filtered
Neuron	AD	87.2389	syn18485175	40	0.26178	0	0.289857	1146	3	1143	AD	3469	6737	2018	3134	2.66858	1.27193	0	2.18373	1.71566	-0.00771278	-0.0762771	10.1706	5.0035	0.119365	single-nuclei	Brain	DLPFC	10X 3' v2	male	509.099	171.566	AD	-0.219724	3000	1000	40_syn18485175_cleaned_filtered
Neuron	Non-degenerative	87	GSE144136	2_Control	0.673401	0	-0.5922	297	2	295		4839	3938	2790	2475	2.66831	1.63604	1.39278	1.8	1.62034	0.00254208	-0.0215062	5.87458	3.89492	-0.016965	single-nuclei	Brain	DLPFC	10X 3' v2	male	389.831	162.034	Control	-0.220683	3000	1000	2_Control_GSE144136_cleaned_filtered
Astrocyte	AD	87	GSE160936	A096_14	0.446582	0	1.03843	2911	13	2898	AD	5009	8716	2246	3333.5	2.75752	1.574	1.44964	3.68427	2.53968	-0.0330372	-0.0371284	13.8099	5.91201	0.0120157	single-nuclei	Brain	SSC EC	10X 3' v3	male	610.317	253.968	AD	0.0932444	3000	1000	A096_14_GSE160936_cleaned_filtered
Neuron	AD	86.9322	syn18485175	46	0.677966	0	-0.0109123	590	4	586	AD	3427.5	6280.5	1957.5	3061.5	2.53451	1.39455	0.680302	2.42662	1.82423	-0.00180416	-0.0341676	8.75256	4.63823	0.0952053	single-nuclei	Brain	DLPFC	10X 3' v2	male	468.43	182.423	AD	-0.691542	3000	1000	46_syn18485175_cleaned_filtered
Neuron	Non-degenerative	86.9158	syn18485175	47	0	0	0.22553	499	0	499	Control		7368		3461	2.61573	1.3606		2.65331	2.08617	-0.00597394		10.8076	4.93387	0.101127	single-nuclei	Brain	DLPFC	10X 3' v2	male	500.401	208.617	Control	-0.405717	3000	1000	47_syn18485175_cleaned_filtered
Neuron	AD	86.4038	syn18485175	8	1.25	0	-0.788474	160	2	158	AD	3300	4209	1907	2281	2.56303	1.45871	1.00268	1.91772	1.49367	0.0152231	-0.0238203	5.98101	3.62025	0.0919912	single-nuclei	Brain	DLPFC	10X 3' v2	male	363.291	149.367	AD	-0.591176	3000	1000	8_syn18485175_cleaned_filtered
Neuron	AD	86.2697	syn18485175	36	0	0	0.909166	405	0	405	AD		10716		4372	2.78712	1.45179		3.71605	2.6321	-0.000305104		15.9679	5.81975	0.127251	single-nuclei	Brain	DLPFC	10X 3' v2	male	592.84	263.21	AD	0.197401	3000	1000	36_syn18485175_cleaned_filtered
Neuron	Non-degenerative	86.13	syn18485175	39	0.294118	0	0.704695	340	1	339	Control	3209	8634	1789	3933	2.71957	1.46968	1.97858	3.37463	2.49853	0.00173597	0.00291736	13.5634	5.56637	0.119021	single-nuclei	Brain	DLPFC	10X 3' v2	male	565.192	249.853	Control	-0.0402933	3000	1000	39_syn18485175_cleaned_filtered
Neuron	AD	86	GSE174367	GSM5292842	0	0	0.759941	139	0	139	AD		9964		3830	3.1001	1.19759		2.58273	1.89209	-0.0325188		18.4388	5.64029	0.148142	single-nuclei	Brain	Frontal cortex	10X 3' v3	male	572.662	189.209	AD	1.29874	3000	1000	GSM5292842_GSE174367_cleaned_filtered
Oligodendrocyte	AD	86	GSE174367	GSM5292842	2.29836	0	-1.33051	7092	163	6929	AD	3640	4272	1734	1945	2.58456	1.20067	1.24128	1.23943	1.01934	-0.00223506	0.00517666	5.92279	2.873	0.0648129	single-nuclei	Brain	Frontal cortex	10X 3' v3	male	289.999	101.934	AD	-0.515415	3000	1000	GSM5292842_GSE174367_cleaned_filtered
Astrocyte	Non-degenerative	86	GSE167494	GSM5106100	0.0565931	0	0.633383	1767	1	1766	Non-symptomatic	3117	12169.5	1753	4303.5	2.48112	1.75361	1.43704	5.95753	5.43658	0.0287516	-0.0142552	13.4083	5.43658	0.0863444	single-nuclei	Brain	DLPFC	10X 3' v3	male	555.549	346.602	Control	-0.879395	3000	1000	GSM5106100_GSE167494_cleaned_filtered
Astrocyte	AD	86	GSE167494	GSM5106106	0.271739	0	0.97119	2944	8	2936	AD	6862.5	13155.5	2848	4570.5	2.58755	1.72206	1.5081	6.26601	5.76839	0.0218511	0.00104974	16.2871	5.76839	0.101086	single-nuclei	Brain	DLPFC	10X 3' v3	male	601.226	345.879	AD	-0.504886	3000	1000	GSM5106106_GSE167494_cleaned_filtered
Oligodendrocyte	AD	86	GSE167494	GSM5106106	1.09235	0	-0.907931	2014	22	1992	AD	3630.5	5393	1916	2417	2.52351	1.35921	1.21313	2.09287	3.38102	-0.00555694	-0.0252238	7.76255	3.38102	0.0789446	single-nuclei	Brain	DLPFC	10X 3' v3	male	347.139	160.442	AD	-0.730239	3000	1000	GSM5106106_GSE167494_cleaned_filtered
Neuron	AD	85.7769	syn18485175	14	0.27972	0	0.742226	715	2	713	AD	9805.5	9841	3788	4264	2.62292	1.39759	0.914706	3.32539	2.47546	-0.00610511	-0.0517178	13.3745	5.61571	0.108818	single-nuclei	Brain	DLPFC	10X 3' v2	male	570.266	247.546	AD	-0.380428	3000	1000	14_syn18485175_cleaned_filtered
Neuron	Non-degenerative	85	GSE174332	191114_PN_324_snRNA-F7	0.0482859	0	1.65595	2071	1	2070	Control	4728	14291.5	2172	5075	2.82352	1.13692	1.13625	3.40676	2.52705	0.0102994	0.00628985	23.8918	6.71691	0.0251787	single-nuclei	Brain	Motor cortex	10X 3' v3	male	693.816	252.705	Control	0.325493	3000	1000	191114_PN_324_snRNA-F7_GSE174332_cleaned_filtered
Oligodendrocyte	Non-degenerative	85	GSE174332	191114_PN_324_snRNA-F7	1.08243	0	-0.838212	1201	13	1188	Control	3256	3699	1816	2001	2.70882	1.32659	1.9267	1.27273	1.13805	0.0149801	0.0352371	5.98653	3.47811	0.0187726	single-nuclei	Brain	Motor cortex	10X 3' v3	male	356.566	113.805	Control	-0.0781523	3000	1000	191114_PN_324_snRNA-F7_GSE174332_cleaned_filtered
OPC	Non-degenerative	85	GSE174332	191114_PN_324_snRNA-F7	0.699301	0	-0.412828	143	1	142	Control	3432	3958.5	1925	2111.5	3.14058	1.36656	0	1.53521	1.37324	0.00282693	-0.0672604	10.3803	3.85211	0.0325819	single-nuclei	Brain	Motor cortex	10X 3' v3	male	414.085	137.324	Control	1.44119	3000	1000	191114_PN_324_snRNA-F7_GSE174332_cleaned_filtered
Astrocyte	Non-degenerative	85	GSE174332	191114_PN_328_snRNA-F9	1.00251	0	-0.670519	399	4	395	Control	4227.5	4533	2248.5	2334	2.64418	1.60038	1.09381	2.07595	1.71899	0.0148228	0.0078514	6.56962	3.74684	0.0143235	single-nuclei	Brain	Motor cortex	10X 3' v3	male	379.241	171.899	Control	-0.305604	3000	1000	191114_PN_328_snRNA-F9_GSE174332_cleaned_filtered
Neuron	Non-degenerative	85	GSE174332	191114_PN_328_snRNA-F9	0	0	1.74558	1988	0	1988	Control		16414		5067.5	2.91856	0.987228		3.01509	2.26559	0.00540087		29.8637	6.91147	0.0309184	single-nuclei	Brain	Motor cortex	10X 3' v3	male	705.936	226.559	Control	0.659918	3000	1000	191114_PN_328_snRNA-F9_GSE174332_cleaned_filtered
Oligodendrocyte	Non-degenerative	85	GSE174332	191114_PN_328_snRNA-F9	1.26939	0	-0.976572	709	9	700	Control	3682	3975	1895	1993	2.66663	1.15542	1.10048	1.01	0.901429	0.000472945	0.00497254	6.04	3.31429	0.0159988	single-nuclei	Brain	Motor cortex	10X 3' v3	male	337.857	90.1429	Control	-0.226605	3000	1000	191114_PN_328_snRNA-F9_GSE174332_cleaned_filtered
Astrocyte	Non-degenerative	85	GSE157827	NC12	0.840336	0	-0.675766	357	3	354	None	3630	4744	2094	2430	2.53103	1.34704	0	1.67797	1.39548	-0.00162972	-0.068681	6.13842	3.75424	0.031793	single-nuclei	Brain	Prefrontal cortex	10X 3' v3	male	378.531	139.548	Control	-0.703757	3000	1000	NC12_GSE157827_cleaned_filtered
Neuron	AD	85	GSE157827	AD5	0.429185	0	-0.0553478	2563	11	2552	AD	3917	5139.5	2219	2708	2.7361	1.27446	1.1955	1.66262	1.41105	0.00237836	-0.02223	8.68966	4.58268	0.047996	single-nuclei	Brain	Prefrontal cortex	10X 3' v3	male	462.422	141.105	AD	0.0178641	3000	1000	AD5_GSE157827_cleaned_filtered
Neuron	Non-degenerative	85	GSE157827	NC12	0.538358	0	0.225167	3715	20	3695	None	3325.5	6765	2007.5	3105	2.74218	1.13462	1.35249	1.71881	1.46252	-0.00908581	-0.00355904	11.0991	4.96915	0.0497452	single-nuclei	Brain	Prefrontal cortex	10X 3' v3	male	500.352	146.252	Control	0.0392605	3000	1000	NC12_GSE157827_cleaned_filtered
Oligodendrocyte	Non-degenerative	85	GSE157827	NC12	3.85802	0	-1.44173	648	25	623	None	3217	3479	1787	1881	2.45698	1.14743	0	0.842697	0.75923	-0.0141742	-0.0139021	4.45907	2.7191	0.00481616	single-nuclei	Brain	Prefrontal cortex	10X 3' v3	male	274.96	75.923	Control	-0.96435	3000	1000	NC12_GSE157827_cleaned_filtered
OPC	Non-degenerative	85	GSE157827	NC12	1.50659	0	-0.249733	531	8	523	None	3659.5	4117	2045	2238	3.20515	1.29715	0	1.40535	1.19503	0.000346116	-0.0609542	11.3155	4.34799	0.107386	single-nuclei	Brain	Prefrontal cortex	10X 3' v3	male	436.138	119.503	Control	1.66843	3000	1000	NC12_GSE157827_cleaned_filtered
Neuron	Non-degenerative	84.9884	syn18485175	13	0.11919	0	0.782969	839	1	838	Control	4433	10833.5	2246	4369.5	2.5818	1.43637	2.04994	3.8031	2.47733	-0.00185023	0.00949188	13.5239	5.6957	0.101848	single-nuclei	Brain	DLPFC	10X 3' v2	male	575.776	247.733	Control	-0.525099	3000	1000	13_syn18485175_cleaned_filtered
Astrocyte	Non-degenerative	84	GSE174332	191114_PN_325_snRNA-F8	1.32159	0	-0.533499	227	3	224	Control	5058	5079.5	2566	2438.5	2.66412	1.50844	1.60022	2.08036	1.70089	0.0136151	0.011665	7.27679	3.90625	0.0154478	single-nuclei	Brain	Motor cortex	10X 3' v3	male	397.768	170.089	Control	-0.23542	3000	1000	191114_PN_325_snRNA-F8_GSE174332_cleaned_filtered
Neuron	Non-degenerative	84	GSE174332	191114_PN_325_snRNA-F8	0	0	1.72046	945	0	945	Control		16271		4934	2.86333	0.972597		2.99683	2.23175	0.0062034		28.8794	6.87619	0.0294067	single-nuclei	Brain	Motor cortex	10X 3' v3	male	702.54	223.175	Control	0.465584	3000	1000	191114_PN_325_snRNA-F8_GSE174332_cleaned_filtered
Oligodendrocyte	Non-degenerative	84	GSE174332	191114_PN_325_snRNA-F8	2.24763	0	-1.1396	2536	57	2479	Control	3523	4443	1804	2083	2.5372	1.25455	1.36537	1.37354	1.17426	0.0162727	0.0146423	5.73981	3.0948	0.0102679	single-nuclei	Brain	Motor cortex	10X 3' v3	male	315.813	117.426	Control	-0.682076	3000	1000	191114_PN_325_snRNA-F8_GSE174332_cleaned_filtered
Astrocyte	AD	84	GSE157827	AD20	2.43161	0	-0.927088	329	8	321	AD	3450	3964	1890.5	2070	2.56954	1.38457	1.34682	1.59813	1.31153	0.0142223	-0.00784485	5.37695	3.42368	0.0360808	single-nuclei	Brain	Prefrontal cortex	10X 3' v3	male	344.548	131.153	AD	-0.568256	3000	1000	AD20_GSE157827_cleaned_filtered
Neuron	AD	84	GSE157827	AD20	0.468384	0	0.0276705	2135	10	2125	AD	3231.5	6091	1824	2790	2.74181	1.05062	1.42388	1.39012	1.18918	-0.013064	0.0177544	10.4701	4.712	0.0523799	single-nuclei	Brain	Prefrontal cortex	10X 3' v3	male	473.647	118.918	AD	0.0379485	3000	1000	AD20_GSE157827_cleaned_filtered
Oligodendrocyte	AD	84	GSE157827	AD20	1.68539	0	-1.1847	356	6	350	AD	3608.5	3662.5	1902.5	1971.5	2.55363	1.3275	1.34357	1.16286	1.02857	0.000767961	0.0133829	5.11143	3.08286	0.0227196	single-nuclei	Brain	Prefrontal cortex	10X 3' v3	male	309.714	102.857	AD	-0.624245	3000	1000	AD20_GSE157827_cleaned_filtered
Neuron	AD	83.4962	syn18485175	42	0.806452	0	0.118346	372	3	369	AD	3830	6087	2253	3008	2.69006	1.44566	1.82808	2.78049	1.91057	0.00434392	0.00117609	10.607	4.81572	0.112616	single-nuclei	Brain	DLPFC	10X 3' v2	male	485.908	191.057	AD	-0.14417	3000	1000	42_syn18485175_cleaned_filtered
Neuron	Non-degenerative	83.3977	syn18485175	41	0.445434	0	-0.260545	449	2	447	Control	3779.5	5822	2061.5	2838	2.55103	1.45076	2.19686	2.42282	1.79418	0.00898683	0.074395	8.09843	4.29083	0.0948416	single-nuclei	Brain	DLPFC	10X 3' v2	male	434.676	179.418	Control	-0.633384	3000	1000	41_syn18485175_cleaned_filtered
Astrocyte	AD	83	GSE160936	A163_17	0.483715	0	0.811862	3101	15	3086	AD	4736	8083	2266	3432.5	2.68189	1.82631	1.23936	4.66461	3.17887	-0.00588333	-0.0661434	12.0311	5.55055	0.00723053	single-nuclei	Brain	SSC EC	10X 3' v3	male	579.682	317.887	AD	-0.172919	3000	1000	A163_17_GSE160936_cleaned_filtered
Oligodendrocyte	Non-degenerative	83	GSE174367	GSM5292851	4.22316	0	-1.59191	4499	190	4309	Control	3509	3989	1695	1839	2.37969	1.39384	1.42039	1.61453	1.26595	0.0218608	0.029769	4.59712	2.51543	0.0423318	single-nuclei	Brain	Frontal cortex	10X 3' v3	male	254.653	126.595	Control	-1.23634	3000	1000	GSM5292851_GSE174367_cleaned_filtered
OPC	Non-degenerative	83	GSE174367	GSM5292851	0	0	-0.0421179	190	0	190	Control		4756		2153.5	3.27347	1.37376		2.13684	1.42632	0.0118458		13.7789	4.60526	0.163888	single-nuclei	Brain	Frontal cortex	10X 3' v3	male	464.211	142.632	Control	1.90884	3000	1000	GSM5292851_GSE174367_cleaned_filtered
Astrocyte	Non-degenerative	83	GSE183068	GSM5550504	0.298285	0	0.801709	1341	4	1337	Normal	3727.5	13590	1827	4103	2.52158	1.35937	1.35983	4.17427	5.6896	-0.0035139	-0.00849989	15.8497	5.6896	-0.0251283	single-nuclei	Brain	PFC	10X 3' v3	male	578.31	286.986	Control	-0.737039	3000	1000	GSM5550504_GSE183068_cleaned_filtered
Neuron	AD	83	GSE183068	GSM5550451	0.100536	0	2.36358	2984	3	2981	AD	21640	22062	5799	5573	2.91149	1.12827	0.677689	5.02751	7.72023	-0.0345732	-0.0354479	40.7065	7.72023	0.0178585	single-nuclei	Brain	PFC	10X 3' v3	male	789.5	314.861	AD	0.635061	3000	1000	GSM5550451_GSE183068_cleaned_filtered
Neuron	Non-degenerative	83	GSE183068	GSM5550504	0.146987	0	1.34678	2041	3	2038	Normal	3506	13217.5	1597	4035.5	2.86208	1.03372	0	2.99019	6.42149	-0.033467	-0.0373271	26.5039	6.42149	0.0104634	single-nuclei	Brain	PFC	10X 3' v3	male	652.012	211.286	Control	0.461174	3000	1000	GSM5550504_GSE183068_cleaned_filtered
Oligodendrocyte	AD	83	GSE183068	GSM5550451	2.28739	0	-1.26942	1705	39	1666	AD	3986	4749.5	1916	2161.5	2.43877	1.25968	1.29215	1.58764	2.91537	0.00293438	-0.00261085	5.59064	2.91537	-0.0380741	single-nuclei	Brain	PFC	10X 3' v3	male	298.259	132.113	AD	-1.02844	3000	1000	GSM5550451_GSE183068_cleaned_filtered
Oligodendrocyte	Non-degenerative	83	GSE183068	GSM5550504	1.84104	0	-1.01025	2227	41	2186	Normal	4608	6489.5	1985	2506.5	2.37614	1.10688	1.0651	1.61116	3.21683	-0.0150429	-0.0189916	7.2484	3.21683	-0.0407072	single-nuclei	Brain	PFC	10X 3' v3	male	333.303	133.76	Control	-1.24883	3000	1000	GSM5550504_GSE183068_cleaned_filtered
Neuron	Non-degenerative	82	GSE144136	6_Suicide	0.384246	0	-0.114764	1041	4	1037		3595.5	5381	2007.5	2815	2.72259	1.56789	2.29891	2.39248	1.94407	0.00878825	0.0910921	8.2594	4.54098	-0.00397874	single-nuclei	Brain	DLPFC	10X 3' v2	male	454.388	194.407	Control	-0.0296813	3000	1000	6_Suicide_GSE144136_cleaned_filtered
Astrocyte	PD	82	GSE178265	pPDsHSrSNxi1963	1.19136	0	-0.0410444	1343	16	1327	PD	4130	6773	2082.5	2886	2.51248	1.71223	1.36595	4.11078	2.37076	0.00639182	-0.0108395	9.61869	4.61341	0.0145924	single-nuclei	Brain	Substantia nigra pars compacta	10X 3' v3	male	464.356	237.076	PD	-0.769054	3000	1000	pPDsHSrSNxi1963_GSE178265_cleaned_filtered
Astrocyte	PD	82	GSE178265	pPDsHSrSNxi3887	0.180995	0	0.417009	1105	2	1103	PD	4138.5	8493	2130.5	3545	2.59035	1.91526	1.12582	5.78694	3.35721	0.0258666	-0.0183494	11.7507	5.21124	0.0129284	single-nuclei	Brain	Substantia nigra pars compacta	10X 3' v3	male	526.292	335.721	PD	-0.495037	3000	1000	pPDsHSrSNxi3887_GSE178265_cleaned_filtered
Neuron	PD	82	GSE178265	pPDsHSrSNxi3887	0.0559597	0	1.06109	1787	1	1786	PD	5435	14090.5	2845	5093	2.4235	1.49508	1.87484	5.17973	3.2766	-0.0227776	0.00484329	15.3242	6.06047	-0.00372106	single-nuclei	Brain	Substantia nigra pars compacta	10X 3' v3	male	613.382	327.66	PD	-1.08215	3000	1000	pPDsHSrSNxi3887_GSE178265_cleaned_filtered
Astrocyte	AD	82	GSE183068	GSM5550487	0	0	1.06277	992	0	992	AD		13598		4085	2.64322	1.41656		4.44859	6.00907	0.000441264		18.0565	6.00907	-0.0105796	single-nuclei	Brain	PFC	10X 3' v3	male	613.609	291.935	AD	-0.308995	3000	1000	GSM5550487_GSE183068_cleaned_filtered
Astrocyte	AD	82	GSE183068	GSM5550494	0.946372	0	-0.00825157	634	6	628	AD	3886	8501	1986	3158.5	2.47897	1.71624	1.18499	4.31369	4.63694	0.0393778	-0.0211054	9.8742	4.63694	-0.0266799	single-nuclei	Brain	PFC	10X 3' v3	male	468.79	263.535	AD	-0.886967	3000	1000	GSM5550494_GSE183068_cleaned_filtered
Neuron	AD	82	GSE183068	GSM5550487	0.0509944	0	1.7994	1961	1	1960	AD	4235	15572	1956	4633.5	2.86878	1.10803	2.08987	3.85357	6.99949	-0.0349367	0.0777107	30.9622	6.99949	0.0129452	single-nuclei	Brain	PFC	10X 3' v3	male	713.214	257.245	AD	0.484747	3000	1000	GSM5550487_GSE183068_cleaned_filtered
Neuron	AD	82	GSE183068	GSM5550494	0.0984252	0	2.03757	1016	1	1015	AD	3623	20057	1971	5111	2.80621	1.10384	1.32446	4.53695	7.31034	-0.0315695	-0.0566318	35.2246	7.31034	0.00474344	single-nuclei	Brain	PFC	10X 3' v3	male	745.419	290.148	AD	0.264583	3000	1000	GSM5550494_GSE183068_cleaned_filtered
Oligodendrocyte	AD	82	GSE183068	GSM5550487	0.945626	0	-0.988259	846	8	838	AD	3781	6475	1902	2517	2.51883	1.07978	1.02051	1.56325	3.2864	-0.0197556	-0.00749912	8.39618	3.2864	-0.0359439	single-nuclei	Brain	PFC	10X 3' v3	male	336.277	128.52	AD	-0.746687	3000	1000	GSM5550487_GSE183068_cleaned_filtered
Oligodendrocyte	AD	82	GSE183068	GSM5550494	2.6076	0	-1.2544	3183	83	3100	AD	3936	5249	1827	2211	2.34665	1.15848	1.31104	1.44645	2.89677	-0.00957576	0.00282054	5.74548	2.89677	-0.0454576	single-nuclei	Brain	PFC	10X 3' v3	male	300.29	119.323	AD	-1.35259	3000	1000	GSM5550494_GSE183068_cleaned_filtered
OPC	AD	82	GSE183068	GSM5550487	0	0	0.91918	155	0	155	AD		10819		3623	3.27676	1.18499		2.79355	5.80645	-0.0164134		29.3484	5.80645	0.0368747	single-nuclei	Brain	PFC	10X 3' v3	male	594.194	206.452	AD	1.92042	3000	1000	GSM5550487_GSE183068_cleaned_filtered
OPC	AD	82	GSE183068	GSM5550494	0	0	0.633759	250	0	250	AD		8700		3077	3.20149	1.31531		2.756	5.472	0.00104556		22.82	5.472	0.034026	single-nuclei	Brain	PFC	10X 3' v3	male	555.6	193.6	AD	1.65554	3000	1000	GSM5550494_GSE183068_cleaned_filtered
Oligodendrocyte	PD	81	GSE157783	IPD4	1.77866	0	-0.569816	1012	18	994	IPD	3609.5	7562	1834	3062	2.47278	1.27713	1.29547	2.3159	1.84406	-0.0119335	-0.000749013	9.45171	3.92354	-0.00623223	single-nuclei	Brain	Midbrain	10X 3' v3	male	392.857	184.406	PD	-0.908735	3000	1000	IPD4_GSE157783_cleaned_filtered
Astrocyte	AD	81	GSE174367	GSM5292843	0.766747	0	-0.626766	2478	19	2459	AD	3477	5269	1870	2429	2.48509	1.80756	1.86264	2.94632	2.09923	0.026765	0.0143395	6.43473	3.81334	0.0687858	single-nuclei	Brain	Frontal cortex	10X 3' v3	male	385.157	209.923	AD	-0.865431	3000	1000	GSM5292843_GSE174367_cleaned_filtered
Neuron	AD	81	GSE174367	GSM5292843	0.257448	0	0.0684911	2719	7	2712	AD	4410	6326	1873	2590.5	2.85769	1.02647	1.15541	1.43695	1.13053	-0.0343349	-0.02154	12.0007	4.75147	0.121173	single-nuclei	Brain	Frontal cortex	10X 3' v3	male	479.167	113.053	AD	0.445744	3000	1000	GSM5292843_GSE174367_cleaned_filtered
Oligodendrocyte	AD	81	GSE174367	GSM5292843	6.50346	0	-1.72148	4044	263	3781	AD	3476	3873	1744	1897	2.28283	1.23002	1.22985	1.11531	0.944195	-0.00693581	-0.008901	3.85956	2.33695	0.024901	single-nuclei	Brain	Frontal cortex	10X 3' v3	male	237.133	94.4195	AD	-1.57718	3000	1000	GSM5292843_GSE174367_cleaned_filtered
Neuron	AD	81	GSE183068	GSM5550466	0	0	0.404403	606	0	606	AD		8458		2964.5	2.68292	0.979686		1.97195	5.17987	-0.026572		14.6997	5.17987	-0.00399975	single-nuclei	Brain	PFC	10X 3' v3	male	524.587	139.604	AD	-0.169283	3000	1000	GSM5550466_GSE183068_cleaned_filtered
Oligodendrocyte	AD	81	GSE183068	GSM5550466	1.94679	0	-0.882119	1541	30	1511	AD	4008.5	5774	1772.5	2320	2.46271	1.19197	1.11195	1.82594	3.4004	-0.00689989	-0.0145999	8.00397	3.4004	-0.0354612	single-nuclei	Brain	PFC	10X 3' v3	male	350.629	136.731	AD	-0.944199	3000	1000	GSM5550466_GSE183068_cleaned_filtered
Astrocyte	PD	81	GSE189202	GSM5696058	0.853018	0	-0.585024	1524	13	1511	Diffuse Lewy Body disease, limbic or transitional type	3447	6082	1971	2667	2.485	1.79993	1.9554	3.38451	3.87095	0.042253	0.047564	7.20516	3.87095	-0.0045193	single-nuclei	Brain	Cingulate gyrus	10X 3' v3	male	390.801	231.568	PD	-0.865753	3000	1000	GSM5696058_GSE189202_cleaned_filtered
Neuron	PD	81	GSE189202	GSM5696058	0.0914286	0	1.84245	4375	4	4371	Diffuse Lewy Body disease, limbic or transitional type	3620.5	22715	1837	5461	2.78039	1.10373	1.14462	4.94303	7.04873	-0.0256042	-0.0308919	36.2251	7.04873	0.0349342	single-nuclei	Brain	Cingulate gyrus	10X 3' v3	male	719.035	303.34	PD	0.173716	3000	1000	GSM5696058_GSE189202_cleaned_filtered
Oligodendrocyte	PD	81	GSE189202	GSM5696058	3.36743	0	-1.37725	2346	79	2267	Diffuse Lewy Body disease, limbic or transitional type	3726	4336	1742	1959	2.42337	1.22068	1.302	1.32069	2.75651	-0.00748744	0.00444357	5.37847	2.75651	-0.0217387	single-nuclei	Brain	Cingulate gyrus	10X 3' v3	male	283.679	110.146	PD	-1.08262	3000	1000	GSM5696058_GSE189202_cleaned_filtered
OPC	PD	81	GSE189202	GSM5696058	0.510204	0	0.397025	392	2	390	Diffuse Lewy Body disease, limbic or transitional type	12826	8102.5	3732	3018.5	3.1151	1.29414	0.880753	2.23077	5.17949	-0.00668413	-0.0566925	18.1769	5.17949	0.0786462	single-nuclei	Brain	Cingulate gyrus	10X 3' v3	male	523.59	174.872	PD	1.35155	3000	1000	GSM5696058_GSE189202_cleaned_filtered
Neuron	Non-degenerative	80.9446	syn18485175	29	0.33557	0	0.457879	596	2	594	Control	3749	7617.5	2042	3482.5	2.70822	1.36036	0.670656	2.69697	2.0202	-0.00447486	-0.0447215	12.5185	5.24747	0.120004	single-nuclei	Brain	DLPFC	10X 3' v2	male	531.818	202.02	Control	-0.0802526	3000	1000	29_syn18485175_cleaned_filtered
Neuron	AD	80.5339	syn18485175	30	0	0	0.841797	252	0	252	AD		9275.5		4271.5	2.75579	1.55984		3.82937	2.73016	0.00275512		14.5476	5.71032	0.122329	single-nuclei	Brain	DLPFC	10X 3' v2	male	583.73	273.016	AD	0.0871339	3000	1000	30_syn18485175_cleaned_filtered
Astrocyte	ALS	80	GSE174332	191112_ALS_127_snRNA-A4	1.06101	0	-0.598283	377	4	373	ALS	3980.5	4660	2192	2498	2.64266	1.70152	1.37921	2.32172	1.76944	0.0148635	-0.0116387	6.53887	3.77748	0.0123163	single-nuclei	Brain	Motor cortex	10X 3' v3	male	389.008	176.944	ALS	-0.310941	3000	1000	191112_ALS_127_snRNA-A4_GSE174332_cleaned_filtered
Neuron	ALS	80	GSE174332	191112_ALS_127_snRNA-A4	0.0419639	0	1.74421	2383	1	2382	ALS	27039	14670.5	7051	5424.5	2.72168	1.19949	0.746455	3.75567	2.77372	0.0111394	-0.0272391	22.5844	6.76196	0.0200344	single-nuclei	Brain	Motor cortex	10X 3' v3	male	705.751	277.372	ALS	-0.0328792	3000	1000	191112_ALS_127_snRNA-A4_GSE174332_cleaned_filtered
Oligodendrocyte	ALS	80	GSE174332	191112_ALS_127_snRNA-A4	1.48448	0	-1.13396	741	11	730	ALS	3173	3647	1867	2047	2.56937	1.31521	0	1.20411	1.08493	0.0056289	-0.0282568	5.12603	3.0589	0.0106486	single-nuclei	Brain	Motor cortex	10X 3' v3	male	316.575	108.493	ALS	-0.568844	3000	1000	191112_ALS_127_snRNA-A4_GSE174332_cleaned_filtered
Astrocyte	Non-degenerative	80	GSE174332	191114_PN_322_snRNA-F5	0	0	-0.255138	209	0	209	Control		6168		2853	2.6833	1.66028		2.91388	2.03828	0.0223658		8.2201	4.27751	0.0152626	single-nuclei	Brain	Motor cortex	10X 3' v3	male	435.407	203.828	Control	-0.167951	3000	1000	191114_PN_322_snRNA-F5_GSE174332_cleaned_filtered
Neuron	Non-degenerative	80	GSE174332	191114_PN_322_snRNA-F5	0	0	1.73455	630	0	630	Control		15634.5		4965	2.97965	1.07859		3.32381	2.45079	0.0124818		30.6857	6.85079	0.0331173	single-nuclei	Brain	Motor cortex	10X 3' v3	male	704.444	245.079	Control	0.874902	3000	1000	191114_PN_322_snRNA-F5_GSE174332_cleaned_filtered
Oligodendrocyte	Non-degenerative	80	GSE174332	191114_PN_322_snRNA-F5	1.20735	0	-1.00348	1905	23	1882	Control	3764	4351	1863	2183.5	2.60995	1.2492	1.29657	1.31084	1.10627	0.00664215	0.00078944	6.17428	3.25186	0.0114163	single-nuclei	Brain	Motor cortex	10X 3' v3	male	334.219	110.627	Control	-0.426039	3000	1000	191114_PN_322_snRNA-F5_GSE174332_cleaned_filtered
Oligodendrocyte	Non-degenerative	80	GSE174332	191114_PN_323_snRNA-F6	2.66809	0	-1.11383	937	25	912	Control	3520	4727.5	1791	2113.5	2.54444	1.14152	1.42325	1.2511	1.02851	0.00648273	0.0178944	6.16886	3.13048	0.0105055	single-nuclei	Brain	Motor cortex	10X 3' v3	male	319.298	102.851	Control	-0.656577	3000	1000	191114_PN_323_snRNA-F6_GSE174332_cleaned_filtered
Neuron	Non-degenerative	80	GSE152058	4294	0	0	2.04733	1226	0	1226	Control		18017.5		4976.5	2.92488	1.229		4.32219	2.9429	-0.0372964		30.4307	7.05791	0.137815	single-nuclei	Brain	Putamen Caudate	10X 3' v3	male	746.737	294.29	Control	0.682154	3000	1000	4294_GSE152058_cleaned_filtered
Oligodendrocyte	Non-degenerative	80	GSE152058	4294	4.86224	0	-1.4386	1234	60	1174	Control	3409.5	3944	1670	1842	2.45139	1.20075	0	1.09455	0.93356	-0.0067974	-0.0155857	5.05196	2.67802	0.0480224	single-nuclei	Brain	Putamen Caudate	10X 3' v3	male	275.383	93.356	Control	-0.984021	3000	1000	4294_GSE152058_cleaned_filtered
Neuron	AD	80	GSE174367	GSM5292844	0.49398	0	0.249183	3239	16	3223	AD	6749.5	6685	2528.5	2618	2.82952	0.931931	0	1.29538	1.01644	-0.0401354	-0.0652164	12.256	4.99348	0.128907	single-nuclei	Brain	Frontal cortex	10X 3' v3	male	503.599	101.644	AD	0.346615	3000	1000	GSM5292844_GSE174367_cleaned_filtered
Oligodendrocyte	AD	80	GSE174367	GSM5292844	2.78699	0	-1.41573	4521	126	4395	AD	3624.5	4750	1697.5	2024	2.36492	1.19647	1.10431	1.42935	1.15813	0.00305784	-0.0146177	5.25484	2.76223	0.0446638	single-nuclei	Brain	Frontal cortex	10X 3' v3	male	278.476	115.813	AD	-1.2883	3000	1000	GSM5292844_GSE174367_cleaned_filtered
OPC	AD	80	GSE174367	GSM5292844	0.420168	0	-0.161255	238	1	237	AD	6899	6404	2332	2529	3.17647	1.38569	1.91662	2.10549	1.57384	0.000300421	0.0736639	14.9662	4.44726	0.144696	single-nuclei	Brain	Frontal cortex	10X 3' v3	male	448.101	157.384	AD	1.56751	3000	1000	GSM5292844_GSE174367_cleaned_filtered
Astrocyte	AD	80	GSE167494	GSM5106120	0.389105	0	0.824899	514	2	512	AD	13527	11658	4331	4129.5	2.5616	1.58064	1.16255	4.55664	5.69336	0.00782798	-0.0446779	14.2109	5.69336	0.0107464	single-nuclei	Brain	DLPFC	10X 3' v3	male	581.445	267.773	AD	-0.596208	3000	1000	GSM5106120_GSE167494_cleaned_filtered
Neuron	AD	80	GSE167494	GSM5106120	0.10846	0	1.29215	922	1	921	AD	3501	12646	1982	4158	2.78837	1.08519	1.34972	3.32899	6.30945	-0.0281241	-0.0195519	26.4256	6.30945	0.017213	single-nuclei	Brain	DLPFC	10X 3' v3	male	644.625	220.413	AD	0.201787	3000	1000	GSM5106120_GSE167494_cleaned_filtered
Astrocyte	AD	80	GSE183068	GSM5550467	0.107875	0	0.688981	927	1	926	AD	4586	11265	2209	3810	2.61126	1.67025	2.02044	5.09287	5.53024	0.0278256	0.00909262	14.8769	5.53024	-0.0180067	single-nuclei	Brain	PFC	10X 3' v3	male	563.067	306.911	AD	-0.421455	3000	1000	GSM5550467_GSE183068_cleaned_filtered
Astrocyte	AD	80	GSE183068	GSM5550481	0.333611	0	0.0294762	1199	4	1195	AD	3230.5	7188	1810.5	2988	2.65518	1.69339	1.86784	3.4954	4.68368	0.027684	0.061316	10.431	4.68368	-0.0122279	single-nuclei	Brain	PFC	10X 3' v3	male	473.891	252.803	AD	-0.266902	3000	1000	GSM5550481_GSE183068_cleaned_filtered
Neuron	AD	80	GSE183068	GSM5550467	0.0540833	0	1.36712	1849	1	1848	AD	3148	12578	1447	4081	2.78984	1.14342	1.99514	3.48377	6.44048	-0.0287237	0.0524822	24.4129	6.44048	0.00267368	single-nuclei	Brain	PFC	10X 3' v3	male	654.762	236.797	AD	0.20697	3000	1000	GSM5550467_GSE183068_cleaned_filtered
Neuron	AD	80	GSE183068	GSM5550481	0	0	1.81348	3281	0	3281	AD		14289		4564	2.87284	1.12484		3.77934	7.02591	-0.0355687		29.6577	7.02591	0.0142175	single-nuclei	Brain	PFC	10X 3' v3	male	715.117	264.889	AD	0.499026	3000	1000	GSM5550481_GSE183068_cleaned_filtered
Oligodendrocyte	AD	80	GSE183068	GSM5550467	1.2069	0	-0.942913	580	7	573	AD	6218	6877	2609	2657	2.39585	1.23208	0.585555	1.98255	3.32461	-0.00758905	-0.0332483	8.20942	3.32461	-0.0421435	single-nuclei	Brain	PFC	10X 3' v3	male	342.408	156.545	AD	-1.17945	3000	1000	GSM5550467_GSE183068_cleaned_filtered
Oligodendrocyte	AD	80	GSE183068	GSM5550481	1.09489	0	-0.929068	1644	18	1626	AD	4582.5	6217	2038.5	2459.5	2.47512	1.17542	1.43331	1.71894	3.32042	-0.00639634	-0.00280612	7.59348	3.32042	-0.0317023	single-nuclei	Brain	PFC	10X 3' v3	male	344.28	142.189	AD	-0.900518	3000	1000	GSM5550481_GSE183068_cleaned_filtered
OPC	AD	80	GSE183068	GSM5550481	0	0	0.951754	214	0	214	AD		8482		3220.5	3.38155	1.31197		2.64953	5.92523	-0.00266167		24.8879	5.92523	0.0561125	single-nuclei	Brain	PFC	10X 3' v3	male	598.598	204.673	AD	2.28917	3000	1000	GSM5550481_GSE183068_cleaned_filtered
Astrocyte	Non-degenerative	80	GSE173731	4294	0.261097	0	0.627192	1149	3	1146	Pancreatic cancer	11009	10422.5	4587	3862	2.63366	1.72438	1.31508	5.27923	5.38394	0.0394247	0.00505878	14.3237	5.38394	0.0297521	single-nuclei	Brain	Caudate Putamen	10X 3' v3	male	554.712	306.108	Pancreatic cancer	-0.342634	3000	1000	4294_GSE173731_cleaned_filtered
Oligodendrocyte	Non-degenerative	80	GSE173731	4294	2.66464	0	-1.30919	2627	70	2557	Pancreatic cancer	3544	4264	1714	1955	2.52512	1.21698	1.27536	1.25616	2.87524	-0.000142391	-0.00247805	5.85647	2.87524	-0.0318416	single-nuclei	Brain	Caudate Putamen	10X 3' v3	male	292.882	103.754	Pancreatic cancer	-0.724576	3000	1000	4294_GSE173731_cleaned_filtered
Neuron	Non-degenerative	79.5346	syn18485175	7	0.462963	0	0.680058	432	2	430	Control	3336	8791	1970.5	3951.5	2.73206	1.50699	2.35787	3.64884	2.54651	0.0111859	0.160726	13.5721	5.53488	0.119734	single-nuclei	Brain	DLPFC	10X 3' v2	male	561.86	254.651	Control	0.00365198	3000	1000	7_syn18485175_cleaned_filtered
Astrocyte	AD	79	GSE148822	Donor11	1.41704	0	-0.859049	5575	79	5496	AD	3654	4194.5	1953	2159	2.60049	2.06092	2.08368	3.25946	2.17595	-0.0120281	0.0051832	5.78821	3.43741	0.0927216	single-nuclei	Brain	occipital cortex occipitotemporal cortex	10X 3' v3	male	353.748	217.595	AD	-0.459333	3000	1000	Donor11_GSE148822_cleaned_filtered
Astrocyte	PD	79	GSE157783	IPD5	1.29151	0	-0.409168	542	7	535	IPD	3418	6097	1945	2758	2.56698	1.76941	1.946	3.36075	2.24673	0.0184246	0.0173744	8.29907	4.13084	0.0360505	single-nuclei	Brain	Midbrain	10X 3' v3	male	414.579	224.673	PD	-0.577256	3000	1000	IPD5_GSE157783_cleaned_filtered
Oligodendrocyte	PD	79	GSE157783	IPD5	2.02655	0	-0.738541	1431	29	1402	IPD	3835	6135.5	1908	2577	2.556	1.65421	1.24531	3.1612	2.12482	0.0252125	-0.00964057	9.04066	3.67974	0.0037936	single-nuclei	Brain	Midbrain	10X 3' v3	male	370.043	212.482	PD	-0.615916	3000	1000	IPD5_GSE157783_cleaned_filtered
Astrocyte	AD	79	GSE160936	A277_12	0.450161	0	1.05158	6220	28	6192	AD	4192	7980	2092.5	3322	2.73116	1.86837	1.74282	4.77471	3.09545	0.00200546	-0.0211398	12.3714	5.89228	0.012474	single-nuclei	Brain	SSC EC	10X 3' v3	male	612.096	309.545	AD	0.000463757	3000	1000	A277_12_GSE160936_cleaned_filtered
Astrocyte	Non-degenerative	79	GSE174367	GSM5292838	1.42989	0	-0.980728	2168	31	2137	Control	3802	4337	2006	2189	2.48349	1.45642	1.21816	1.87506	1.53907	-0.00329418	-0.0305801	5.33739	3.33131	0.0583874	single-nuclei	Brain	Frontal cortex	10X 3' v3	male	337.295	153.907	Control	-0.871072	3000	1000	GSM5292838_GSE174367_cleaned_filtered
Astrocyte	Non-degenerative	79	GSE174367	GSM5292856	1.81818	0	-0.643674	1100	20	1080	Control	3516.5	4628.5	1949	2299.5	2.58114	1.60418	1.9635	2.20926	1.7213	-0.000644671	0.0419057	6.70741	3.79167	0.0755409	single-nuclei	Brain	Frontal cortex	10X 3' v3	male	382.87	172.13	Control	-0.527421	3000	1000	GSM5292856_GSE174367_cleaned_filtered
Neuron	Non-degenerative	79	GSE174367	GSM5292838	0.201106	0	0.628297	3978	8	3970	Control	3781.5	8531	2041	3478	2.859	1.11055	0.567479	2.00504	1.61108	-0.0417558	-0.053936	14.6599	5.45466	0.121984	single-nuclei	Brain	Frontal cortex	10X 3' v3	male	554.861	161.108	Control	0.450334	3000	1000	GSM5292838_GSE174367_cleaned_filtered
Neuron	Non-degenerative	79	GSE174367	GSM5292856	0.065083	0	0.569345	3073	2	3071	Control	4680.5	7467	2406.5	3210	2.88944	1.2195	1.56848	2.07131	1.62879	-0.0339265	0.0241292	14.0482	5.41485	0.130739	single-nuclei	Brain	Frontal cortex	10X 3' v3	male	546.89	162.879	Control	0.55744	3000	1000	GSM5292856_GSE174367_cleaned_filtered
Oligodendrocyte	Non-degenerative	79	GSE174367	GSM5292838	6.04569	0	-1.69121	2845	172	2673	Control	3313.5	3486	1696.5	1756	2.38467	1.32934	1.30075	1.09428	0.941264	0.00321609	-0.00308208	3.91208	2.37074	0.0403687	single-nuclei	Brain	Frontal cortex	10X 3' v3	male	241.227	94.1264	Control	-1.21881	3000	1000	GSM5292838_GSE174367_cleaned_filtered
Oligodendrocyte	Non-degenerative	79	GSE174367	GSM5292854	3.42559	0	-1.42091	5167	177	4990	Control	3825	4511.5	1791	1984	2.39294	1.09928	1.28738	1.05992	0.909419	-0.00875496	0.00674002	5.11363	2.73427	0.0449158	single-nuclei	Brain	Frontal cortex	10X 3' v3	male	277.776	90.9419	Control	-1.18969	3000	1000	GSM5292854_GSE174367_cleaned_filtered
Oligodendrocyte	Non-degenerative	79	GSE174367	GSM5292856	3.71528	0	-1.52496	5437	202	5235	Control	3440	3694	1710.5	1783	2.45547	1.29081	1.35088	1.14059	0.957402	0.00338348	0.0126104	4.41872	2.59503	0.0511467	single-nuclei	Brain	Frontal cortex	10X 3' v3	male	263.706	95.7402	Control	-0.969666	3000	1000	GSM5292856_GSE174367_cleaned_filtered
OPC	Non-degenerative	79	GSE174367	GSM5292856	0	0	-0.211859	429	0	429	Control		4510		2210	3.34547	1.3606		1.52681	1.23077	-0.00683465		13.1422	4.39161	0.176236	single-nuclei	Brain	Frontal cortex	10X 3' v3	male	441.259	123.077	Control	2.16219	3000	1000	GSM5292856_GSE174367_cleaned_filtered
Astrocyte	Non-degenerative	79	GSE178265	pPDCN3898	0.989346	0	-0.442524	1314	13	1301	Control	3649	6823	2069	2941	2.37715	1.54544	1.87065	2.87702	2.25826	-0.0012203	0.00689036	7.19754	4.01384	-0.00386896	single-nuclei	Brain	Caudate nucleus	10X 3' v3	male	410.069	225.826	Control	-1.24528	3000	1000	pPDCN3898_GSE178265_cleaned_filtered
Neuron	Non-degenerative	79	GSE178265	pPDCN3898	0.297619	0	-0.0997487	336	1	335	Control	7637	5729	2586	2342	2.84229	1.2492	0	1.66567	1.3403	-0.010249	-0.0662559	10.3791	4.54925	0.0470845	single-nuclei	Brain	Caudate nucleus	10X 3' v3	male	456.418	134.03	Control	0.391552	3000	1000	pPDCN3898_GSE178265_cleaned_filtered
Astrocyte	AD	79	GSE183068	GSM5550476	0	0	1.41156	1012	0	1012	AD/TLBD		15270.5		4290	2.61431	1.7638		7.5998	6.48617	0.0399904		19.7727	6.48617	-0.0105926	single-nuclei	Brain	PFC	10X 3' v3	male	660.771	360.178	AD	-0.410725	3000	1000	GSM5550476_GSE183068_cleaned_filtered
Astrocyte	AD	79	GSE183068	GSM5550480	0.684932	0	0.231491	584	4	580	AD/CAA	3799	8414.5	1933	3073	2.63616	1.82498	1.64301	4.75345	4.97586	0.0528643	0.0238842	11.7621	4.97586	-0.0109739	single-nuclei	Brain	PFC	10X 3' v3	male	501.207	285.517	AD	-0.333814	3000	1000	GSM5550480_GSE183068_cleaned_filtered
Neuron	AD	79	GSE183068	GSM5550476	0	0	1.74205	3041	0	3041	AD/TLBD		17164		4779	2.79875	1.17399		4.6146	6.90332	-0.0255562		31.3341	6.90332	0.00244787	single-nuclei	Brain	PFC	10X 3' v3	male	705.459	289.806	AD	0.238333	3000	1000	GSM5550476_GSE183068_cleaned_filtered
Neuron	AD	79	GSE183068	GSM5550480	0.297398	0	1.28309	1345	4	1341	AD/CAA	4093	10819	1959.5	3602	2.85968	1.01202	0	2.74124	6.32215	-0.0353575	-0.0569246	25.956	6.32215	0.0144871	single-nuclei	Brain	PFC	10X 3' v3	male	643.4	189.262	AD	0.452724	3000	1000	GSM5550480_GSE183068_cleaned_filtered
Oligodendrocyte	AD	79	GSE183068	GSM5550476	1.07914	0	-0.40673	1390	15	1375	AD/TLBD	4159	8985	1842	2948	2.43965	1.27585	1.40488	2.81745	3.92945	0.002993	0.00706399	10.5084	3.92945	-0.0345445	single-nuclei	Brain	PFC	10X 3' v3	male	414.909	197.964	AD	-1.02534	3000	1000	GSM5550476_GSE183068_cleaned_filtered
Oligodendrocyte	AD	79	GSE183068	GSM5550480	1.0917	0	-0.602864	2290	25	2265	AD/CAA	5081	8266	2109	2792	2.50804	1.33519	1.18943	2.70993	3.77307	0.008447	0.000841021	10.4728	3.77307	-0.0316385	single-nuclei	Brain	PFC	10X 3' v3	male	388.389	194.216	AD	-0.784654	3000	1000	GSM5550480_GSE183068_cleaned_filtered
Astrocyte	Non-degenerative	79	GSE186538	HSB231	3.62069	0	-1.06934	1160	42	1118	Control	3567.5	3758.5	2025.5	2117.5	2.49821	1.81087	1.70496	2.13148	3.21377	0.0265976	0.0341155	4.62701	3.21377	-0.014686	single-nuclei	Brain	Dentate gyrus Hippocampus Subiculum Entorhinal cortex	10X 3' v3	male	325.313	177.907	Control	-0.81926	3000	1000	HSB231_GSE186538_cleaned_filtered
Neuron	Non-degenerative	79	GSE186538	HSB231	0.0442674	0	0.708124	9036	4	9032	Control	3254.5	9515.5	1834.5	3791.5	2.85835	1.05524	0.696579	2.16087	5.5537	-0.0301071	-0.0114554	17.1669	5.5537	-0.00636125	single-nuclei	Brain	Dentate gyrus Hippocampus Subiculum Entorhinal cortex	10X 3' v3	male	565.655	172.885	Control	0.448034	3000	1000	HSB231_GSE186538_cleaned_filtered
Oligodendrocyte	Non-degenerative	79	GSE186538	HSB231	5.01139	0	-1.66446	439	22	417	Control	3223.5	3263	1781.5	1780	2.36842	1.40395	1.41819	1.20624	2.41007	0.00267758	0.0196634	3.65707	2.41007	-0.0270123	single-nuclei	Brain	Dentate gyrus Hippocampus Subiculum Entorhinal cortex	10X 3' v3	male	244.844	106.475	Control	-1.27597	3000	1000	HSB231_GSE186538_cleaned_filtered
OPC	Non-degenerative	79	GSE186538	HSB231	1.07034	0	-0.32953	654	7	647	Control	3356	3991	1905	2127	3.15246	1.34824	0	1.47141	4.1932	0.00213504	-0.0208019	9.81762	4.1932	0.00650607	single-nuclei	Brain	Dentate gyrus Hippocampus Subiculum Entorhinal cortex	10X 3' v3	male	425.348	124.575	Control	1.48302	3000	1000	HSB231_GSE186538_cleaned_filtered
Astrocyte	Non-degenerative	78	GSE148822	Donor8	3.10386	0	-0.920026	2513	78	2435	None	3628.5	4594	1890.5	2237	2.46753	1.82611	1.82384	2.78316	2.00452	-0.0412866	-0.0408054	5.57002	3.32444	0.0828228	single-nuclei	Brain	occipital cortex occipitotemporal cortex	10X 3' v3	male	345.503	200.452	Control	-0.927215	3000	1000	Donor8_GSE148822_cleaned_filtered
Oligodendrocyte	Non-degenerative	78	GSE148822	Donor8	2.96221	0	-1.24409	979	29	950	None	3565	3903.5	1789	1934	2.52864	1.35974	1.29349	1.39263	1.16737	-0.0803092	-0.0956518	5.23053	2.86	0.0799472	single-nuclei	Brain	occipital cortex occipitotemporal cortex	10X 3' v3	male	301.684	116.737	Control	-0.712175	3000	1000	Donor8_GSE148822_cleaned_filtered
Astrocyte	Non-degenerative	78	GSE157827	NC17	2.0794	0	-0.899618	529	11	518	None	3613	4045	1951	2143.5	2.54355	1.42619	1.35652	1.63127	1.37645	0.0111614	0.015109	5.36486	3.47104	0.0319537	single-nuclei	Brain	Prefrontal cortex	10X 3' v3	male	348.263	137.645	Control	-0.659717	3000	1000	NC17_GSE157827_cleaned_filtered
Neuron	Non-degenerative	78	GSE157827	NC17	0.490798	0	0.228493	3260	16	3244	None	3464	6528	2070.5	3007	2.75659	1.04241	1.19394	1.45006	1.24969	-0.0155186	0.00184975	10.9627	4.99014	0.0551369	single-nuclei	Brain	Prefrontal cortex	10X 3' v3	male	500.801	124.969	Control	0.0899692	3000	1000	NC17_GSE157827_cleaned_filtered
Oligodendrocyte	Non-degenerative	78	GSE157827	NC17	3.93343	0	-1.42542	661	26	635	None	3242	3610	1763	1899	2.38706	1.18752	1.39299	0.919685	0.828346	-0.00993836	0.0124865	4.33228	2.74803	0.0027413	single-nuclei	Brain	Prefrontal cortex	10X 3' v3	male	277.165	82.8346	Control	-1.2104	3000	1000	NC17_GSE157827_cleaned_filtered
Astrocyte	PD	78	GSE178265	pPDsHSrSNxi4568	0.263158	0	-0.529349	1140	3	1137	PD	5396	5743	2653	2677	2.82946	1.57403	1.21298	2.84521	2.05541	-0.000822776	0.014697	11.0862	3.95163	0.0189936	single-nuclei	Brain	Substantia nigra pars compacta	10X 3' v3	male	398.329	205.541	PD	0.346375	3000	1000	pPDsHSrSNxi4568_GSE178265_cleaned_filtered
Oligodendrocyte	PD	78	GSE178265	pPDsHSrSNxi4568	0.498753	0	0.402357	802	4	798	PD	6056.5	7639.5	2668	3273	2.9663	1.28341	0.42925	2.23935	1.8609	-0.0201286	-0.0529462	15.1253	5.15288	0.0477075	single-nuclei	Brain	Substantia nigra pars compacta	10X 3' v3	male	524.311	186.09	PD	0.827919	3000	1000	pPDsHSrSNxi4568_GSE178265_cleaned_filtered
OPC	PD	78	GSE178265	pPDsHSrSNxi4568	0.496894	0	0.404454	805	4	801	PD	6056.5	7650	2668	3273	2.96588	1.2836	0.42925	2.24345	1.86267	-0.0200658	-0.0529462	15.1248	5.15605	0.0476953	single-nuclei	Brain	Substantia nigra pars compacta	10X 3' v3	male	524.594	186.267	PD	0.826424	3000	1000	pPDsHSrSNxi4568_GSE178265_cleaned_filtered
Astrocyte	AD	78	GSE183068	GSM5550490	0.318979	0	0.617784	627	2	625	AD	3227	11195	1724	3751	2.57274	1.79622	1.13949	6.0544	5.416	0.0457509	0.00555228	15.4432	5.416	-0.0194591	single-nuclei	Brain	PFC	10X 3' v3	male	553.44	339.84	AD	-0.557001	3000	1000	GSM5550490_GSE183068_cleaned_filtered
Astrocyte	AD	78	GSE183068	GSM5550491	1.04895	0	-0.123693	572	6	566	AD	4611	8451	2361.5	3358	2.40057	1.82014	1.97901	4.83922	4.45053	0.0451732	0.0460165	9.23675	4.45053	-0.0398549	single-nuclei	Brain	PFC	10X 3' v3	male	453.18	306.89	AD	-1.16286	3000	1000	GSM5550491_GSE183068_cleaned_filtered
Neuron	AD	78	GSE183068	GSM5550490	0.0791766	0	1.35417	1263	1	1262	AD	3208	12649.5	1574	4088.5	2.81607	1.12824	1.41518	3.6664	6.37639	-0.0324415	0.00871061	27.4144	6.37639	0.00385232	single-nuclei	Brain	PFC	10X 3' v3	male	653.011	228.368	AD	0.299273	3000	1000	GSM5550490_GSE183068_cleaned_filtered
Neuron	AD	78	GSE183068	GSM5550491	0.144439	0	0.960695	2077	3	2074	AD	5599	9685	2435	3454.5	2.74956	1.16917	0.715489	2.98939	5.90453	-0.0229745	-0.0203409	19.972	5.90453	-0.00334481	single-nuclei	Brain	PFC	10X 3' v3	male	599.807	200.096	AD	0.0652375	3000	1000	GSM5550491_GSE183068_cleaned_filtered
Oligodendrocyte	AD	78	GSE183068	GSM5550490	1.49701	0	-0.818208	1670	25	1645	AD	5879	7875	2233	2744	2.4287	1.2181	1.10858	2.2462	3.47964	-0.00740497	-0.00575496	9.54954	3.47964	-0.0387462	single-nuclei	Brain	PFC	10X 3' v3	male	359.271	165.836	AD	-1.06385	3000	1000	GSM5550490_GSE183068_cleaned_filtered
Oligodendrocyte	AD	78	GSE183068	GSM5550491	4.46927	0	-1.35169	537	24	513	AD	3844	4983	1847.5	2114	2.32797	1.23988	1.85509	1.68616	2.76998	0.000447012	0.0473025	5.63548	2.76998	-0.0473162	single-nuclei	Brain	PFC	10X 3' v3	male	287.135	127.096	AD	-1.41832	3000	1000	GSM5550491_GSE183068_cleaned_filtered
OPC	AD	78	GSE183068	GSM5550490	0	0	2.02986	160	0	160	AD		18161.5		4717.5	3.30735	1.26683		5.0875	7.23125	-0.00794911		49.775	7.23125	0.0437736	single-nuclei	Brain	PFC	10X 3' v3	male	744.375	329.375	AD	2.02804	3000	1000	GSM5550490_GSE183068_cleaned_filtered
OPC	AD	78	GSE183068	GSM5550491	0	0	1.17303	270	0	270	AD		11792		3821	3.26195	1.42635		4.14074	6.12963	0.00914328		29.3556	6.12963	0.0376799	single-nuclei	Brain	PFC	10X 3' v3	male	628.519	262.963	AD	1.8683	3000	1000	GSM5550491_GSE183068_cleaned_filtered
Neuron	Other dementias	77	GSE174332	191113_FTLD_222_snRNA-E1	0	0	1.7275	630	0	630	FTLD		17688		5062.5	2.85032	0.993133		3.20317	2.17302	0.00728019		29.2841	6.9127	0.0288238	single-nuclei	Brain	Motor cortex	10X 3' v3	male	703.492	217.302	LBD/FTLD	0.419778	3000	1000	191113_FTLD_222_snRNA-E1_GSE174332_cleaned_filtered
Oligodendrocyte	Other dementias	77	GSE174332	191113_FTLD_222_snRNA-E1	2.23464	0	-1.13188	1074	24	1050	FTLD	3888	4691.5	1964	2134.5	2.49162	1.26404	1.29587	1.52571	1.27524	0.0189855	0.00743571	5.79524	3.08476	0.00957952	single-nuclei	Brain	Motor cortex	10X 3' v3	male	316.857	127.524	LBD/FTLD	-0.842441	3000	1000	191113_FTLD_222_snRNA-E1_GSE174332_cleaned_filtered
Astrocyte	Other dementias	77	GSE174332	201025_FTLD_237_snRNA-C9	1.7301	0	-0.652403	289	5	284	FTLD	3702	4711	1979	2382	2.59679	1.59707	1.74208	2.19014	1.77113	0.0200792	0.0289002	6.44718	3.74296	0.0123813	single-nuclei	Brain	Motor cortex	10X 3' v3	male	381.69	177.113	LBD/FTLD	-0.472372	3000	1000	201025_FTLD_237_snRNA-C9_GSE174332_cleaned_filtered
Neuron	Other dementias	77	GSE174332	201025_FTLD_237_snRNA-C9	0	0	1.97741	692	0	692	FTLD		19962.5		5876	2.84118	1.09507		4.10549	2.90896	0.00909785		31.7919	7.17775	0.0259802	single-nuclei	Brain	Motor cortex	10X 3' v3	male	737.283	290.896	LBD/FTLD	0.387637	3000	1000	201025_FTLD_237_snRNA-C9_GSE174332_cleaned_filtered
Oligodendrocyte	Other dementias	77	GSE174332	201025_FTLD_237_snRNA-C9	1.84218	0	-1.15504	3637	67	3570	FTLD	3402	4173	1832	2080	2.56483	1.36613	1.42854	1.57591	1.32381	0.023918	0.0301661	5.6619	3.05714	0.0100725	single-nuclei	Brain	Motor cortex	10X 3' v3	male	313.725	132.381	LBD/FTLD	-0.584815	3000	1000	201025_FTLD_237_snRNA-C9_GSE174332_cleaned_filtered
OPC	Other dementias	77	GSE174332	201025_FTLD_237_snRNA-C9	0.740741	0	0.0901075	135	1	134	FTLD	5769	5341.5	2838	2536	3.23077	1.0801	1.00555	1.42537	1.18657	-0.0119996	-0.0344475	12.8881	4.29851	0.0398452	single-nuclei	Brain	Motor cortex	10X 3' v3	male	482.09	118.657	LBD/FTLD	1.75858	3000	1000	201025_FTLD_237_snRNA-C9_GSE174332_cleaned_filtered
Neuron	Non-degenerative	77	GSE144136	11_Suicide	0.206754	0	-0.301968	1451	3	1448		4077	4689	2216	2442.5	2.8052	1.38766	1.30084	1.87707	1.59254	0.00479635	-0.0161914	8.19613	4.28315	0.00101208	single-nuclei	Brain	DLPFC	10X 3' v2	male	429.075	159.254	Control	0.261013	3000	1000	11_Suicide_GSE144136_cleaned_filtered
Astrocyte	Non-degenerative	77	GSE148822	Donor6	3.26548	0	-1.16479	2358	77	2281	None	3417	3942	1770	1908	2.46187	1.74169	1.43704	2.19158	1.6861	-0.0448925	-0.0594525	4.90618	3.04033	0.0824752	single-nuclei	Brain	occipital cortex occipitotemporal cortex	10X 3' v3	male	312.407	168.61	Control	-0.947136	3000	1000	Donor6_GSE148822_cleaned_filtered
Neuron	PD	77	GSE157783	IPD3	0.621118	0	0.73101	161	1	160	IPD	3591	7909	1988	3346	3.11199	1.36526	0	2.61875	1.775	-0.040896	-0.0979523	19.475	5.59375	0.147132	single-nuclei	Brain	Midbrain	10X 3' v3	male	568.75	177.5	PD	1.34061	3000	1000	IPD3_GSE157783_cleaned_filtered
Oligodendrocyte	PD	77	GSE157783	IPD3	1.10357	0	-0.713783	1178	13	1165	IPD	3813	5410	1874	2520	2.61247	1.3529	1.17515	1.95279	1.5485	-0.00193526	-0.0183433	8.28498	3.69957	0.0215784	single-nuclei	Brain	Midbrain	10X 3' v3	male	373.391	154.85	PD	-0.417198	3000	1000	IPD3_GSE157783_cleaned_filtered
Neuron	Non-degenerative	77	GSE160936	A053_11	0	0	1.15752	352	0	352	Non-disease control		6157		2488.5	3.01118	1.02109		1.65909	1.19318	-0.0945761		17.1591	5.65341	0.0391485	single-nuclei	Brain	SSC EC	10X 3' v3	male	626.42	119.318	Control	0.985855	3000	1000	A053_11_GSE160936_cleaned_filtered
Astrocyte	AD	77	GSE183068	GSM5550495	0.337838	0	0.584823	1184	4	1180	AD	3943.5	11542.5	1965.5	3781.5	2.50595	1.58885	1.23037	4.80508	5.39831	0.0239177	-0.0301022	13.6356	5.39831	-0.0248743	single-nuclei	Brain	PFC	10X 3' v3	male	548.983	300.847	AD	-0.792017	3000	1000	GSM5550495_GSE183068_cleaned_filtered
Neuron	AD	77	GSE183068	GSM5550495	0.0828844	0	2.37314	2413	2	2411	AD	4633.5	24893	1943.5	5759	2.8415	1.05904	0.693522	5.00664	7.708	-0.0386592	-0.0358413	41.1954	7.708	0.00879985	single-nuclei	Brain	PFC	10X 3' v3	male	790.792	308.959	AD	0.388769	3000	1000	GSM5550495_GSE183068_cleaned_filtered
Oligodendrocyte	AD	77	GSE183068	GSM5550495	3.9239	0	-1.16136	841	33	808	AD	4304	5844.5	1953	2285	2.32135	1.18959	1.30103	1.56931	2.9901	-0.00506299	-4.90026e-05	6.17946	2.9901	-0.0410369	single-nuclei	Brain	PFC	10X 3' v3	male	312.871	124.505	AD	-1.44163	3000	1000	GSM5550495_GSE183068_cleaned_filtered
Neuron	Non-degenerative	76.8843	syn18485175	15	0.393185	0	0.789396	1526	6	1520	Control	3504.5	10036.5	1978.5	4400.5	2.51568	1.56492	1.7462	4.10724	2.65197	0.00450886	0.00960129	11.9671	5.65197	0.0934229	single-nuclei	Brain	DLPFC	10X 3' v2	male	576.645	265.197	Control	-0.75778	3000	1000	15_syn18485175_cleaned_filtered
Oligodendrocyte	ALS	76	GSE174332	191112_ALS_126_snRNA-A6	2.21584	0	-1.20534	2437	54	2383	ALS	3445.5	4000	1926	2133	2.56338	1.27685	0.638144	1.28577	1.08645	0.0015326	-0.00957462	5.38901	2.97524	0.00788913	single-nuclei	Brain	Motor cortex	10X 3' v3	male	306.924	108.645	ALS	-0.589927	3000	1000	191112_ALS_126_snRNA-A6_GSE174332_cleaned_filtered
OPC	ALS	76	GSE174332	191112_ALS_126_snRNA-A6	0.793651	0	-0.0732572	126	1	125	ALS	6018	4678	3012	2424	3.08525	1.23536	1.46403	1.512	1.208	-0.00958491	-0.00752578	10.192	4.328	0.0340453	single-nuclei	Brain	Motor cortex	10X 3' v3	male	460	120.8	ALS	1.24649	3000	1000	191112_ALS_126_snRNA-A6_GSE174332_cleaned_filtered
Astrocyte	AD	76	GSE183068	GSM5550475	0.412797	0	0.989711	969	4	965	AD/TLBD	3832	14048	1869	3943	2.52447	1.77978	1.71126	7.34301	5.95751	0.0509045	0.0237715	17.0456	5.95751	-0.0188672	single-nuclei	Brain	PFC	10X 3' v3	male	603.731	345.803	AD	-0.726862	3000	1000	GSM5550475_GSE183068_cleaned_filtered
Neuron	AD	76	GSE183068	GSM5550475	0.121507	0	1.69763	1646	2	1644	AD/TLBD	4439	16880.5	2061.5	4607.5	2.81823	1.09089	1.14671	4.18552	6.8899	-0.0314498	0.0334755	32.66	6.8899	0.00602396	single-nuclei	Brain	PFC	10X 3' v3	male	699.453	254.501	AD	0.306887	3000	1000	GSM5550475_GSE183068_cleaned_filtered
Oligodendrocyte	AD	76	GSE183068	GSM5550475	0.785498	0	-0.66247	1655	13	1642	AD/TLBD	3774	6788	1853	2681	2.54006	1.69165	2.20103	3.38063	3.7095	0.0363161	0.0802425	8.74665	3.7095	-0.0307035	single-nuclei	Brain	PFC	10X 3' v3	male	380.329	218.758	AD	-0.671979	3000	1000	GSM5550475_GSE183068_cleaned_filtered
OPC	AD	76	GSE183068	GSM5550475	0.380228	0	1.04398	263	1	262	AD/TLBD	7673	11859.5	2806	3537	3.03407	1.37275	2.17698	4.0916	6.03053	0.0118317	0.12706	26.3015	6.03053	0.0245503	single-nuclei	Brain	PFC	10X 3' v3	male	611.069	249.237	AD	1.0664	3000	1000	GSM5550475_GSE183068_cleaned_filtered
Neuron	Other dementias	75	GSE174332	191113_FTLD_226_snRNA-E4	0	0	1.60695	445	0	445	FTLD		17365		5024	2.89678	0.970505		3.3191	2.2382	0.0024553		31.4674	6.71011	0.0281984	single-nuclei	Brain	Motor cortex	10X 3' v3	male	687.191	223.82	LBD/FTLD	0.583276	3000	1000	191113_FTLD_226_snRNA-E4_GSE174332_cleaned_filtered
Oligodendrocyte	Other dementias	75	GSE174332	191113_FTLD_226_snRNA-E4	1.14068	0	-0.929436	263	3	260	FTLD	3802	4579.5	2100	2141.5	2.57773	1.06913	0	0.984615	0.869231	-0.00964117	-0.0176735	6.28077	3.37692	0.0138253	single-nuclei	Brain	Motor cortex	10X 3' v3	male	344.231	86.9231	LBD/FTLD	-0.539436	3000	1000	191113_FTLD_226_snRNA-E4_GSE174332_cleaned_filtered
Astrocyte	Other dementias	75	GSE174332	201025_FTLD_240_snRNA-C12	0.826446	0	-0.624843	242	2	240	FTLD	3762.5	4177.5	2114	2204	2.65334	1.71049	0.607157	2.24167	1.77083	0.025685	-0.051162	6.30833	3.80417	0.0171175	single-nuclei	Brain	Motor cortex	10X 3' v3	male	385.417	177.083	LBD/FTLD	-0.273386	3000	1000	201025_FTLD_240_snRNA-C12_GSE174332_cleaned_filtered
Neuron	Other dementias	75	GSE174332	201025_FTLD_240_snRNA-C12	0.117371	0	2.07624	852	1	851	FTLD	10722	18445	4582	5684	2.99574	1.19309	0.658898	4.3631	3.06345	0.0150682	-0.0466978	35.2115	7.25969	0.0308733	single-nuclei	Brain	Motor cortex	10X 3' v3	male	750.646	306.345	LBD/FTLD	0.93151	3000	1000	201025_FTLD_240_snRNA-C12_GSE174332_cleaned_filtered
Oligodendrocyte	Other dementias	75	GSE174332	201025_FTLD_240_snRNA-C12	1.33929	0	-1.02376	3584	48	3536	FTLD	3509	3859.5	1872	1984	2.65847	1.30778	0	1.24661	1.09304	0.0128491	-0.00269507	5.92166	3.22879	0.0146524	single-nuclei	Brain	Motor cortex	10X 3' v3	male	331.476	109.304	LBD/FTLD	-0.255304	3000	1000	201025_FTLD_240_snRNA-C12_GSE174332_cleaned_filtered
OPC	Other dementias	75	GSE174332	201025_FTLD_240_snRNA-C12	0.408163	0	0.340773	245	1	244	FTLD	3378	5560.5	1800	2537	3.16797	1.3104	0	1.72951	1.43033	0.00026038	-0.0571185	12.7664	4.79918	0.0424357	single-nuclei	Brain	Motor cortex	10X 3' v3	male	515.984	143.033	LBD/FTLD	1.53757	3000	1000	201025_FTLD_240_snRNA-C12_GSE174332_cleaned_filtered
Astrocyte	AD	75	GSE148822	Donor18	2.83998	0	-0.975732	3662	104	3558	AD	3634.5	4310.5	1898	2116.5	2.50787	1.85169	1.72067	2.62985	2.06015	-0.0312546	-0.0507782	5.42074	3.28359	0.0844688	single-nuclei	Brain	occipital cortex occipitotemporal cortex	10X 3' v3	male	337.971	206.015	AD	-0.785276	3000	1000	Donor18_GSE148822_cleaned_filtered
Oligodendrocyte	Non-degenerative	75	GSE183068	GSM5550503	0.980392	0	-0.495939	816	8	808	Normal	5769.5	7144.5	2322	2772.5	2.53542	1.50575	2.08835	3.02475	3.89975	0.021785	0.0822378	9.15223	3.89975	-0.0287225	single-nuclei	Brain	PFC	10X 3' v3	male	402.847	212.005	Control	-0.688327	3000	1000	GSM5550503_GSE183068_cleaned_filtered
OPC	Non-degenerative	75	GSE183068	GSM5550503	0	0	1.09035	248	0	248	Normal		9216.5		3299	3.17058	1.43527		3.45565	6.05242	0.00732307		24.0484	6.05242	0.0392422	single-nuclei	Brain	PFC	10X 3' v3	male	617.339	241.532	Control	1.54678	3000	1000	GSM5550503_GSE183068_cleaned_filtered
Neuron	HD	75	GSE173731	S18409	2.94952	0	-0.872289	1763	52	1711	HD	3969.5	6365	2114.5	3116	2.09214	1.33293	1.2907	2.10754	3.41204	-0.0344949	-0.0250396	5.18001	3.41204	-0.0532613	single-nuclei	Brain	Caudate Putamen	10X 3' v3	male	351.958	166.569	HD	-2.24818	3000	1000	S18409_GSE173731_cleaned_filtered
Astrocyte	Other dementias	74	GSE174332	191113_FTLD_218_snRNA-H4	2.34375	0	-0.641236	128	3	125	FTLD	3429	4528	1772	2195	2.60454	1.61281	1.04187	2.184	1.56	0.0177783	-0.0125946	6.48	3.8	0.0153759	single-nuclei	Brain	Motor cortex	10X 3' v3	male	383.2	156	LBD/FTLD	-0.445081	3000	1000	191113_FTLD_218_snRNA-H4_GSE174332_cleaned_filtered
Neuron	Other dementias	74	GSE174332	191113_FTLD_218_snRNA-H4	0	0	1.9482	780	0	780	FTLD		18047		5446.5	2.84526	1.02365		3.50128	2.49103	0.00381127		30.1141	7.15128	0.0278699	single-nuclei	Brain	Motor cortex	10X 3' v3	male	733.333	249.103	LBD/FTLD	0.401995	3000	1000	191113_FTLD_218_snRNA-H4_GSE174332_cleaned_filtered
Oligodendrocyte	Other dementias	74	GSE174332	191113_FTLD_218_snRNA-H4	2.00803	0	-1.15349	2490	50	2440	FTLD	3406	4352.5	1737	2057.5	2.51486	1.11487	1.14073	1.06926	0.927049	-0.00069182	0.0041295	5.60492	3.0623	0.00983413	single-nuclei	Brain	Motor cortex	10X 3' v3	male	313.934	92.7049	LBD/FTLD	-0.760658	3000	1000	191113_FTLD_218_snRNA-H4_GSE174332_cleaned_filtered
Oligodendrocyte	Non-degenerative	74	GSE174332	191114_PN_319_snRNA-F4	2.30326	0	-1.16065	521	12	509	Control	4235	5500	2052	2443	2.4392	1.31015	1.40212	1.72299	1.389	0.0157583	0.00792505	6.0668	3.03929	0.00491756	single-nuclei	Brain	Motor cortex	10X 3' v3	male	312.967	138.9	Control	-1.0269	3000	1000	191114_PN_319_snRNA-F4_GSE174332_cleaned_filtered
Oligodendrocyte	Other dementias	74	GSE174332	191113_FTLD_224_snRNA-E2	4.02844	0	-1.22003	422	17	405	FTLD	3308	4100	1728	1941	2.46436	1.22491	1.78989	1.30617	1.01481	0.00689328	0.0292941	5.08889	2.88148	0.00949386	single-nuclei	Brain	Motor cortex	10X 3' v3	male	304.938	101.481	LBD/FTLD	-0.938367	3000	1000	191113_FTLD_224_snRNA-E2_GSE174332_cleaned_filtered
Astrocyte	Non-degenerative	74	GSE160936	A319_11	0.196625	0	1.31496	6103	12	6091	Non-disease control	8590.5	9910	3414	3579	2.76528	1.75856	1.72684	5.32934	3.00722	-0.0139161	-0.018018	16.2445	6.28961	0.0125896	single-nuclei	Brain	EC SSC	10X 3' v3	male	647.71	300.722	Control	0.120525	3000	1000	A319_11_GSE160936_cleaned_filtered
Astrocyte	Other dementias	74	GSE178265	pPDsHSrSNxi2569	2.41636	0	-0.867752	538	13	525	LBD	3464	4262	2033	2351	2.51685	1.92395	1.3576	2.8781	2.15429	0.0228731	-0.0163184	5.47048	3.48	0.00912162	single-nuclei	Brain	Substantia nigra pars compacta	10X 3' v3	male	352.571	215.429	LBD/FTLD	-0.753665	3000	1000	pPDsHSrSNxi2569_GSE178265_cleaned_filtered
Oligodendrocyte	Other dementias	74	GSE178265	pPDsHSrSNxi2569	1.02249	0	0.159917	489	5	484	LBD	4012	5309	2426	2692	3.08122	1.40038	1.24965	2.2438	1.83264	-0.0076754	-0.0191737	13.5537	4.77686	0.0598388	single-nuclei	Brain	Substantia nigra pars compacta	10X 3' v3	male	491.529	183.264	LBD/FTLD	1.23233	3000	1000	pPDsHSrSNxi2569_GSE178265_cleaned_filtered
OPC	Other dementias	74	GSE178265	pPDsHSrSNxi2569	1.08225	0	0.0364626	462	5	457	LBD	4012	5226	2426	2651	3.13366	1.44244	1.24965	1.97155	1.65864	-0.00574492	-0.0191737	12.151	4.60613	0.0632838	single-nuclei	Brain	Substantia nigra pars compacta	10X 3' v3	male	474.836	165.864	LBD/FTLD	1.41686	3000	1000	pPDsHSrSNxi2569_GSE178265_cleaned_filtered
Astrocyte	ALS	72	GSE174332	191112_ALS_124_snRNA-A3	1.18203	0	-1.023	423	5	418	ALS	3169	3916.5	1847	2062.5	2.51294	1.70954	1.34466	2.06699	1.56938	0.0218155	-0.0216376	5.20813	3.25359	0.0106822	single-nuclei	Brain	Motor cortex	10X 3' v3	male	331.579	156.938	ALS	-0.767443	3000	1000	191112_ALS_124_snRNA-A3_GSE174332_cleaned_filtered
Neuron	ALS	72	GSE174332	191112_ALS_124_snRNA-A3	0	0	1.62776	1971	0	1971	ALS		14253		5112	2.87386	1.04821		2.92491	2.32623	0.00277418		24.8985	6.69762	0.0262229	single-nuclei	Brain	Motor cortex	10X 3' v3	male	690.005	232.623	ALS	0.502626	3000	1000	191112_ALS_124_snRNA-A3_GSE174332_cleaned_filtered
Oligodendrocyte	ALS	72	GSE174332	191112_ALS_124_snRNA-A3	1.20482	0	-0.924849	747	9	738	ALS	3271	3671	1865	1965	2.70321	1.2761	1.41094	1.08672	0.990515	0.00637392	0.0103407	5.90379	3.3523	0.0177765	single-nuclei	Brain	Motor cortex	10X 3' v3	male	344.851	99.0515	ALS	-0.0978674	3000	1000	191112_ALS_124_snRNA-A3_GSE174332_cleaned_filtered
OPC	ALS	72	GSE174332	191112_ALS_124_snRNA-A3	1.08696	0	-0.0456254	276	3	273	ALS	3244	3979	1842	2149	3.06851	1.24974	0	1.14286	1.00366	-0.0167366	-0.0482347	9.22344	4.21978	0.0379294	single-nuclei	Brain	Motor cortex	10X 3' v3	male	463.736	100.366	ALS	1.18759	3000	1000	191112_ALS_124_snRNA-A3_GSE174332_cleaned_filtered
Astrocyte	Non-degenerative	72	GSE148822	Donor1	2.73598	0	-1.00483	731	20	711	None	3435.5	4138	1849.5	2102	2.52606	1.71497	1.41637	2.21941	1.6512	-0.0606077	-0.0807175	5.24332	3.25879	0.0850779	single-nuclei	Brain	occipital cortex occipitotemporal cortex	10X 3' v3	male	334.037	165.12	Control	-0.721252	3000	1000	Donor1_GSE148822_cleaned_filtered
Oligodendrocyte	Non-degenerative	72	GSE148822	Donor1	5.31646	0	-1.66192	395	21	374	None	3297	3426	1744	1766	2.36667	1.32995	1.43728	1	0.898396	-0.090984	-0.077012	3.7754	2.34225	0.059453	single-nuclei	Brain	occipital cortex occipitotemporal cortex	10X 3' v3	male	245.187	89.8396	Control	-1.28214	3000	1000	Donor1_GSE148822_cleaned_filtered
Astrocyte	HD	72	GSE152058	2030	1.12936	0	-0.0539043	974	11	963	HD	4701	7310	2226	2970	2.59005	1.6351	1.08203	3.36968	2.26064	0.0111673	-0.0100421	9.77155	4.53686	0.0742473	single-nuclei	Brain	Caudate Putamen	10X 3' v3	male	462.617	226.064	HD	-0.496078	3000	1000	2030_GSE152058_cleaned_filtered
Neuron	HD	72	GSE152058	2030	0	0	1.62515	1034	0	1034	HD		15048		4402	2.91154	1.11729		3.30754	2.27853	-0.0425633		26.1306	6.40039	0.143949	single-nuclei	Brain	Caudate Putamen	10X 3' v3	male	689.652	227.853	HD	0.635223	3000	1000	2030_GSE152058_cleaned_filtered
Oligodendrocyte	HD	72	GSE152058	2030	2.36267	0	-1.29704	3386	80	3306	HD	3481	4276	1711.5	1910	2.48919	1.19953	1.23731	1.25953	1.02783	-0.00363785	-0.0128821	5.66727	2.86449	0.0505011	single-nuclei	Brain	Caudate Putamen	10X 3' v3	male	294.525	102.783	HD	-0.851015	3000	1000	2030_GSE152058_cleaned_filtered
Astrocyte	Non-degenerative	72	GSE183068	GSM5550501	0.528634	0	0.535026	1135	6	1129	Normal	3469.5	11742	1797	3810	2.56946	1.37557	1.9337	3.81754	5.35075	-0.00301714	0.0493441	14.9194	5.35075	-0.0202293	single-nuclei	Brain	PFC	10X 3' v3	male	542.25	259.433	Control	-0.568541	3000	1000	GSM5550501_GSE183068_cleaned_filtered
Neuron	Non-degenerative	72	GSE183068	GSM5550501	0.0684932	0	1.9901	1460	1	1459	Normal	3804	21853	2071	5367	2.84946	1.05453	1.8338	4.66415	7.2111	-0.0386188	-0.0102285	38.8156	7.2111	0.00779148	single-nuclei	Brain	PFC	10X 3' v3	male	738.999	287.731	Control	0.416774	3000	1000	GSM5550501_GSE183068_cleaned_filtered
Oligodendrocyte	Non-degenerative	72	GSE183068	GSM5550501	0.155763	0	-0.20317	642	1	641	Normal	3011	9201	1533	3038	2.6052	1.06673	1.46352	2.078	4.26677	-0.0201011	0.0156604	12.9594	4.26677	-0.0213127	single-nuclei	Brain	PFC	10X 3' v3	male	442.434	163.807	Control	-0.442767	3000	1000	GSM5550501_GSE183068_cleaned_filtered
OPC	Non-degenerative	72	GSE183068	GSM5550501	0	0	1.36825	295	0	295	Normal		15301		4307	3.28715	1.13371		3.40678	6.4339	-0.0224613		39.4475	6.4339	0.0338504	single-nuclei	Brain	PFC	10X 3' v3	male	654.915	246.102	Control	1.95698	3000	1000	GSM5550501_GSE183068_cleaned_filtered
Astrocyte	PD	72	GSE189202	GSM5696060	0.421348	0	0.487512	712	3	709	GBA N370S/WT - heterozygous for GBA	4682	10410	2036	3516	2.58009	1.57587	1.78286	4.15797	5.29901	0.0213339	-0.00117838	12.8307	5.29901	0.0173444	single-nuclei	Brain	Cingulate gyrus	10X 3' v3	male	535.825	279.126	PD	-0.531136	3000	1000	GSM5696060_GSE189202_cleaned_filtered
Neuron	PD	72	GSE189202	GSM5696060	0.0460087	0	2.08482	4347	2	4345	GBA N370S/WT - heterozygous for GBA	14922	20556	4536.5	5382	2.90892	1.17997	0.349601	5.20069	7.3298	-0.0224518	-0.0977547	38.2656	7.3298	0.0581147	single-nuclei	Brain	Cingulate gyrus	10X 3' v3	male	751.807	321.473	PD	0.625985	3000	1000	GSM5696060_GSE189202_cleaned_filtered
Oligodendrocyte	PD	72	GSE189202	GSM5696060	1.23362	0	-1.13935	1297	16	1281	GBA N370S/WT - heterozygous for GBA	3718	4778	1782.5	2136	2.49056	1.15096	1.07851	1.3185	3.08587	-0.0102565	-0.0259623	6	3.08587	-0.0162499	single-nuclei	Brain	Cingulate gyrus	10X 3' v3	male	315.847	113.739	PD	-0.846172	3000	1000	GSM5696060_GSE189202_cleaned_filtered
Neuron	HD	72	GSE173731	2030	0	0	1.667	853	0	853	HD		16991		4678	3.06173	1.09622		4.04338	6.83236	-0.0241657		41.9461	6.83236	0.130457	single-nuclei	Brain	Caudate Putamen	10X 3' v3	male	695.311	261.547	HD	1.16374	3000	1000	2030_GSE173731_cleaned_filtered
Oligodendrocyte	HD	72	GSE173731	2030	1.64141	0	-0.92506	4752	78	4674	HD	4064.5	5563.5	1884	2306	2.5365	1.10095	0.458897	1.49059	3.37441	-0.00500331	-0.0201113	7.78776	3.37441	-0.024987	single-nuclei	Brain	Caudate Putamen	10X 3' v3	male	344.822	121.181	HD	-0.684528	3000	1000	2030_GSE173731_cleaned_filtered
Astrocyte	ALS	71	GSE174332	191112_ALS_122_snRNA-D2	2.94118	0	-0.972677	102	3	99	ALS	4277	4170	2265	2227	2.38571	2.11079	1.62383	3.15152	2.10101	0.0476494	-0.0044125	4.9798	3.28283	0.00641215	single-nuclei	Brain	Motor cortex	10X 3' v3	male	338.384	210.101	ALS	-1.21514	3000	1000	191112_ALS_122_snRNA-D2_GSE174332_cleaned_filtered
Neuron	ALS	71	GSE174332	191112_ALS_122_snRNA-D2	0	0	2.24068	177	0	177	ALS		19690		5289	3.02852	0.961758		3.42938	2.36723	0.00457948		39.0904	7.53107	0.0389915	single-nuclei	Brain	Motor cortex	10X 3' v3	male	772.881	236.723	ALS	1.04685	3000	1000	191112_ALS_122_snRNA-D2_GSE174332_cleaned_filtered
Oligodendrocyte	ALS	71	GSE174332	191112_ALS_122_snRNA-D2	1.37817	0	-0.917567	1814	25	1789	ALS	3799	4776	1906	2176	2.61317	1.38368	1.4417	1.72163	1.39128	0.0271299	0.0266365	6.75293	3.39631	0.0139172	single-nuclei	Brain	Motor cortex	10X 3' v3	male	345.836	139.128	ALS	-0.414726	3000	1000	191112_ALS_122_snRNA-D2_GSE174332_cleaned_filtered
OPC	ALS	71	GSE174332	191112_ALS_122_snRNA-D2	0	0	-0.21672	133	0	133	ALS		5354		2466	2.94133	1.37049		1.81955	1.48872	0.00300105		9.94737	4.21053	0.0261155	single-nuclei	Brain	Motor cortex	10X 3' v3	male	440.602	148.872	ALS	0.740035	3000	1000	191112_ALS_122_snRNA-D2_GSE174332_cleaned_filtered
Astrocyte	Other dementias	71	GSE174332	191113_FTLD_217_snRNA-D11	1.03627	0	-1.16749	193	2	191	FTLD	3785	3497	2029	1937	2.48475	1.42974	1.74273	1.50785	1.29319	0.00745557	0.0231921	4.60209	3.06806	0.00969047	single-nuclei	Brain	Motor cortex	10X 3' v3	male	312.042	129.319	LBD/FTLD	-0.86664	3000	1000	191113_FTLD_217_snRNA-D11_GSE174332_cleaned_filtered
Neuron	Other dementias	71	GSE174332	191113_FTLD_217_snRNA-D11	0.0308166	0	1.27354	3245	1	3244	FTLD	3927	11394.5	2101	4561	2.7267	1.1035	0	2.69328	2.08354	0.00434571	-0.052973	17.8055	6.23767	0.0205554	single-nuclei	Brain	Motor cortex	10X 3' v3	male	642.109	208.354	LBD/FTLD	-0.015226	3000	1000	191113_FTLD_217_snRNA-D11_GSE174332_cleaned_filtered
Astrocyte	Other dementias	71	GSE174332	191113_FTLD_225_snRNA-H5	1.89873	0	-0.426336	158	3	155	FTLD	3370	6161	1814	2876	2.54712	1.86011	1.96395	3.38065	2.53548	0.0470404	0.0440619	7.49032	4.00645	0.0120551	single-nuclei	Brain	Motor cortex	10X 3' v3	male	412.258	253.548	LBD/FTLD	-0.647158	3000	1000	191113_FTLD_225_snRNA-H5_GSE174332_cleaned_filtered
Neuron	Other dementias	71	GSE174332	191113_FTLD_225_snRNA-H5	0.0853971	0	1.7927	1171	1	1170	FTLD	3496	16968	1847	5330	2.86473	1.15025	1.90521	3.85726	2.69487	0.0127258	0.0892193	28.7581	6.88547	0.0272992	single-nuclei	Brain	Motor cortex	10X 3' v3	male	712.308	269.487	LBD/FTLD	0.470494	3000	1000	191113_FTLD_225_snRNA-H5_GSE174332_cleaned_filtered
Oligodendrocyte	Other dementias	71	GSE174332	191113_FTLD_225_snRNA-H5	2.23124	0	-1.1783	493	11	482	FTLD	4180	4354.5	2168	2125.5	2.42845	1.26586	1.29292	1.37137	1.16598	0.0110342	0.0104315	5.18257	2.99585	0.00801924	single-nuclei	Brain	Motor cortex	10X 3' v3	male	310.581	116.598	LBD/FTLD	-1.06475	3000	1000	191113_FTLD_225_snRNA-H5_GSE174332_cleaned_filtered
Astrocyte	AD	71	GSE157827	AD2	0.608519	0	-0.929029	493	3	490	AD	3026	3948.5	1746	1994	2.59658	1.38363	1.46378	1.5449	1.3	0.0112871	0.0320179	5.57551	3.42449	0.0428912	single-nuclei	Brain	Prefrontal cortex	10X 3' v3	male	344.286	130	AD	-0.473113	3000	1000	AD2_GSE157827_cleaned_filtered
Neuron	AD	71	GSE157827	AD2	0.360774	0	0.347204	3049	11	3038	AD	3756	7292	2011	3187.5	2.78133	1.03396	1.29812	1.5609	1.33311	-0.0172145	-0.00369543	12.2413	5.1422	0.058354	single-nuclei	Brain	Prefrontal cortex	10X 3' v3	male	516.853	133.311	AD	0.177033	3000	1000	AD2_GSE157827_cleaned_filtered
Oligodendrocyte	AD	71	GSE157827	AD2	3.01508	0	-1.46858	597	18	579	AD	3251	3444	1775.5	1830	2.55513	1.20344	1.30267	0.908463	0.799655	-0.00779414	-0.0063579	4.58895	2.68912	0.00994326	single-nuclei	Brain	Prefrontal cortex	10X 3' v3	male	271.33	79.9655	AD	-0.618968	3000	1000	AD2_GSE157827_cleaned_filtered
OPC	AD	71	GSE157827	AD2	0.262467	0	-0.0829882	381	1	380	AD	3452	4441	1863	2186.5	3.17341	1.27932	0	1.42895	1.25789	0.00617355	-0.0692817	11.8947	4.57632	0.118494	single-nuclei	Brain	Prefrontal cortex	10X 3' v3	male	458.684	125.789	AD	1.55673	3000	1000	AD2_GSE157827_cleaned_filtered
Astrocyte	AD	71	GSE167494	GSM5106105	0.258621	0	0.565497	2320	6	2314	AD	6722	11307.5	2886.5	4055	2.48869	1.61091	1.33704	4.8038	5.33881	0.0171239	0.0249897	13.0635	5.33881	0.0903133	single-nuclei	Brain	DLPFC	10X 3' v3	male	546.37	326.75	AD	-0.852766	3000	1000	GSM5106105_GSE167494_cleaned_filtered
Neuron	AD	71	GSE167494	GSM5106105	0.251572	0	1.11507	795	2	793	AD	3918.5	12366	2009	4258	2.82495	1.17732	0	3.08953	6.13115	-0.0492419	-0.0941876	21.6469	6.13115	0.131959	single-nuclei	Brain	DLPFC	10X 3' v3	male	620.681	225.725	AD	0.330521	3000	1000	GSM5106105_GSE167494_cleaned_filtered
Oligodendrocyte	AD	71	GSE167494	GSM5106105	2.33415	0	-1.20352	2442	57	2385	AD	3954	5647	2010	2556	2.38751	1.28802	1.17161	1.78071	2.98784	-0.0169375	-0.0316201	6.20419	2.98784	0.0584785	single-nuclei	Brain	DLPFC	10X 3' v3	male	307.17	146.625	AD	-1.20882	3000	1000	GSM5106105_GSE167494_cleaned_filtered
Pericyte	AD	71	GSE167494	GSM5106105	3.04348	0	-1.06088	230	7	223	AD	3654	4717	2048	2386	2.31492	1.87656	1.59331	2.98655	3.06278	0.0318862	-0.0053464	4.89686	3.06278	0.0576833	single-nuclei	Brain	DLPFC	10X 3' v3	male	326.457	215.695	AD	-1.46426	3000	1000	GSM5106105_GSE167494_cleaned_filtered
Astrocyte	AD	71	GSE183068	GSM5550479	0	0	0.0792022	748	0	748	AD		7630.5		2926.5	2.63141	1.8385		4.33957	4.74465	0.0529917		10.8088	4.74465	-0.00857485	single-nuclei	Brain	PFC	10X 3' v3	male	480.615	259.893	AD	-0.350526	3000	1000	GSM5550479_GSE183068_cleaned_filtered
Astrocyte	AD	71	GSE183068	GSM5550489	0.0750751	0	0.982125	1332	1	1331	AD	14845	13148	4188	4062	2.57671	1.64237	1.47434	5.44027	5.95342	0.0264477	0.00733878	15.8415	5.95342	-0.0171531	single-nuclei	Brain	PFC	10X 3' v3	male	602.705	316.379	AD	-0.543014	3000	1000	GSM5550489_GSE183068_cleaned_filtered
Neuron	AD	71	GSE183068	GSM5550479	0.138744	0	1.4895	2883	4	2879	AD	7031	15394	2828	4438	2.79983	1.09035	0.385825	3.86558	6.56964	-0.0289163	-0.0672348	29.4995	6.56964	0.00136912	single-nuclei	Brain	PFC	10X 3' v3	male	671.309	252.796	AD	0.24212	3000	1000	GSM5550479_GSE183068_cleaned_filtered
Neuron	AD	71	GSE183068	GSM5550489	0.0874508	0	2.15221	2287	2	2285	AD	5796.5	19641	2210	5144	2.87116	1.03406	1.35421	4.05252	7.45077	-0.0425721	0.0137882	36.2538	7.45077	0.0162454	single-nuclei	Brain	PFC	10X 3' v3	male	760.919	268.184	AD	0.493142	3000	1000	GSM5550489_GSE183068_cleaned_filtered
Oligodendrocyte	AD	71	GSE183068	GSM5550479	2.27342	0	-1.22673	3299	75	3224	AD	4102	5232.5	1811	2173.5	2.39865	1.28181	1.23588	1.7103	2.94572	0.00436334	0.000731908	6.05676	2.94572	-0.0385315	single-nuclei	Brain	PFC	10X 3' v3	male	304.032	132.878	AD	-1.1696	3000	1000	GSM5550479_GSE183068_cleaned_filtered
Oligodendrocyte	AD	71	GSE183068	GSM5550489	0.725953	0	-0.577832	1102	8	1094	AD	3830	7643.5	1852	2921	2.42547	1.27545	1.98689	2.23675	3.82358	-0.00586839	0.0321886	8.49452	3.82358	-0.0382575	single-nuclei	Brain	PFC	10X 3' v3	male	391.773	174.863	AD	-1.07523	3000	1000	GSM5550489_GSE183068_cleaned_filtered
Astrocyte	Other dementias	70	GSE174332	201025_FTLD_234_snRNA-C6	0	0	-0.295124	210	0	210	FTLD		5280		2390	2.90111	1.52103		2.10952	1.47619	0.00889887		9.50952	4.22381	0.0252186	single-nuclei	Brain	Motor cortex	10X 3' v3	male	430	147.619	LBD/FTLD	0.598516	3000	1000	201025_FTLD_234_snRNA-C6_GSE174332_cleaned_filtered
Neuron	Other dementias	70	GSE174332	201025_FTLD_234_snRNA-C6	0	0	0.933844	680	0	680	FTLD		11429.5		4254.5	2.86423	1.12279		2.80294	2.03235	0.00951017		20.7221	5.83824	0.0243425	single-nuclei	Brain	Motor cortex	10X 3' v3	male	596.176	203.235	LBD/FTLD	0.468758	3000	1000	201025_FTLD_234_snRNA-C6_GSE174332_cleaned_filtered
Oligodendrocyte	Other dementias	70	GSE174332	201025_FTLD_234_snRNA-C6	1.05597	0	-0.993717	947	10	937	FTLD	3602	4092	1855	2110	2.5813	1.20035	1.35063	1.11526	0.972252	-0.00640129	0.0168796	5.83031	3.26147	0.0129036	single-nuclei	Brain	Motor cortex	10X 3' v3	male	335.539	97.2252	LBD/FTLD	-0.526882	3000	1000	201025_FTLD_234_snRNA-C6_GSE174332_cleaned_filtered
Neuron	Non-degenerative	70	GSE152058	4308	0.0492368	0	1.69366	2031	1	2030	Control	20954	16296.5	4913	4625.5	2.87502	1.24122	0.888594	4.0936	2.6803	-0.0364537	-0.0699166	26.8941	6.5734	0.128729	single-nuclei	Brain	Caudate Putamen	10X 3' v3	male	698.916	268.03	Control	0.506717	3000	1000	4308_GSE152058_cleaned_filtered
Microglia	Non-degenerative	94	GSE157760	C	1.22378	0	-0.647886	572	7	565	Control	4213	4170	2220	2286	2.73848	2.23807	2.09443	4.01593	2.55221	0.0547616	0.0242736	6.83363	3.70973	0.0139417	single-nuclei	Brain	Cortex	10X 3' v3	male	382.301	255.221	Control	0.0262211	3000	1000	C_GSE157760_cleaned_filtered
Neuron	Non-degenerative	70	GSE173731	4308	0.117142	0	1.93427	5122	6	5116	Leukemia	3839	20048.5	1568.5	5283	3.07005	1.07432	1.28243	4.11806	7.21169	-0.0271134	0.0148159	43.9754	7.21169	0.122258	single-nuclei	Brain	Caudate Putamen	10X 3' v3	male	731.45	285.36	Leukemia	1.19302	3000	1000	4308_GSE173731_cleaned_filtered
Neuron	Non-degenerative	70	GSE140231	C4	0.290698	0	-0.0232347	1376	4	1372	Normal	3635.5	6032.5	2143	3161	2.61425	1.76689	1.92015	3.31122	4.59402	-0.00307133	-0.00724892	8.6188	4.59402	0.0551438	single-nuclei	Brain	Substantia nigra Cortex	10X 3' v2	male	466.764	248.688	Control	-0.410921	3000	1000	C4_GSE140231_cleaned_filtered
Astrocyte	Non-degenerative	69	GSE157760	A	1.82186	0	-0.399577	988	18	970	Control	4159	6407	2143	3013.5	2.41089	1.90785	1.43533	4.10206	2.92371	0.0236242	-0.0191295	7.40722	4.06495	0.00315192	single-nuclei	Brain	Cortex	10X 3' v3	male	415.876	292.371	Control	-1.12654	3000	1000	A_GSE157760_cleaned_filtered
Microglia	AD	91	GSE183068	GSM5550450	0.813008	0	-0.626106	123	1	122	AD	6140	4843	2488	2270.5	2.70491	2.36026	1.77258	5.21311	3.81148	0.0962392	0.0160424	8.2377	3.81148	0.00730824	single-nuclei	Brain	PFC	10X 3' v3	male	385.246	290.164	AD	-0.0918814	3000	1000	GSM5550450_GSE183068_cleaned_filtered
OPC	Non-degenerative	69	GSE157760	A	0.573614	0	0.307899	523	3	520	Control	5224	6465.5	2468	2856	3.07157	1.46634	0.970327	2.61731	2.00385	-0.018481	-0.0815234	15.6904	4.50192	0.0343289	single-nuclei	Brain	Cortex	10X 3' v3	male	511.538	200.385	Control	1.19835	3000	1000	A_GSE157760_cleaned_filtered
Astrocyte	AD	69	GSE157827	AD1	0	0	-0.369945	171	0	171	AD		5318		2563	2.6085	1.63471		2.62573	1.94737	0.0325429		7.50292	4.15789	0.0499911	single-nuclei	Brain	Prefrontal cortex	10X 3' v3	male	419.883	194.737	AD	-0.431172	3000	1000	AD1_GSE157827_cleaned_filtered
Neuron	AD	69	GSE157827	AD1	0.530705	0	0.503845	1319	7	1312	AD	4256	8360	2306	3326	2.80447	1.04107	1.28247	1.76524	1.42607	-0.0110033	-0.00766325	13.859	5.33765	0.0666122	single-nuclei	Brain	Prefrontal cortex	10X 3' v3	male	538.034	142.607	AD	0.258447	3000	1000	AD1_GSE157827_cleaned_filtered
Neuron	AD	69	GSE157827	AD8	0.907029	0	-0.0685186	441	4	437	AD	3988.5	6795	1989	2813	2.62983	0.981142	0	1.38444	1.16247	-0.0123534	-0.0410649	9.94279	4.57895	0.0386714	single-nuclei	Brain	Prefrontal cortex	10X 3' v3	male	460.641	116.247	AD	-0.356104	3000	1000	AD8_GSE157827_cleaned_filtered
Oligodendrocyte	AD	69	GSE157827	AD1	2.72953	0	-1.4037	403	11	392	AD	3368	3591.5	1762	1822.5	2.53351	1.2364	1.4072	0.969388	0.859694	-0.00103092	0.0161195	4.77806	2.78316	0.0155802	single-nuclei	Brain	Prefrontal cortex	10X 3' v3	male	280.102	85.9694	AD	-0.695052	3000	1000	AD1_GSE157827_cleaned_filtered
OPC	AD	69	GSE157827	AD1	0.52356	0	0.125255	191	1	190	AD	4914	5568	2327	2609	3.20609	1.28969	0	1.7	1.46842	0.00856801	-0.0655227	14.7053	4.83158	0.122389	single-nuclei	Brain	Prefrontal cortex	10X 3' v3	male	486.842	146.842	AD	1.67174	3000	1000	AD1_GSE157827_cleaned_filtered
Microglia	PD	90	GSE178265	pPDsHSrSNxi2142	0.884956	0	-0.543404	226	2	224	PD	3515.5	3843.5	1909	2146.5	2.92063	1.9487	2.08251	2.98214	2.11161	0.0253275	0.0422519	7.37054	3.90625	0.0466179	single-nuclei	Brain	Substantia nigra pars compacta	10X 3' v3	male	396.429	211.161	PD	0.667214	3000	1000	pPDsHSrSNxi2142_GSE178265_cleaned_filtered
Microglia	Non-degenerative	83	GSE183068	GSM5550504	0	0	-0.284941	443	0	443	Normal		5314		2428	2.83196	2.48512		6.19639	4.26185	0.113388		9.3702	4.26185	0.0237372	single-nuclei	Brain	PFC	10X 3' v3	male	431.377	312.19	Control	0.355182	3000	1000	GSM5550504_GSE183068_cleaned_filtered
Astrocyte	ALS	68	GSE174332	191112_ALS_130_snRNA-A5	0.990099	0	-0.879373	101	1	100	ALS	4492	3710.5	2410	2056	2.55316	1.71458	0	1.9	1.63	0.0201511	-0.0896903	4.88	3.49	0.0122765	single-nuclei	Brain	Motor cortex	10X 3' v3	male	351	163	ALS	-0.625892	3000	1000	191112_ALS_130_snRNA-A5_GSE174332_cleaned_filtered
Neuron	ALS	68	GSE174332	191112_ALS_130_snRNA-A5	0.0293169	0	1.46289	3411	1	3410	ALS	8643	13215.5	2884	4829	2.82804	1.09473	1.19816	3.01642	2.24751	0.00794635	0.0285107	22.876	6.48534	0.0251551	single-nuclei	Brain	Motor cortex	10X 3' v3	male	667.713	224.751	ALS	0.341384	3000	1000	191112_ALS_130_snRNA-A5_GSE174332_cleaned_filtered
Oligodendrocyte	ALS	68	GSE174332	191112_ALS_130_snRNA-A5	4.01235	0	-1.20185	648	26	622	ALS	3379.5	3639	1840.5	1962.5	2.53111	1.29234	0.58665	1.12862	0.990354	0.00546618	-0.00307115	4.77331	2.98071	0.0104721	single-nuclei	Brain	Motor cortex	10X 3' v3	male	307.395	99.0354	ALS	-0.703497	3000	1000	191112_ALS_130_snRNA-A5_GSE174332_cleaned_filtered
OPC	ALS	68	GSE174332	191112_ALS_130_snRNA-A5	1.14068	0	-0.232546	263	3	260	ALS	3679	4209.5	2001	2215	3.06536	1.23937	0	1.23846	1.11923	-0.0121237	-0.0754231	9.63846	3.88077	0.0342017	single-nuclei	Brain	Motor cortex	10X 3' v3	male	438.462	111.923	ALS	1.17652	3000	1000	191112_ALS_130_snRNA-A5_GSE174332_cleaned_filtered
Astrocyte	Non-degenerative	68	GSE178175	GSM5381311	0.238854	0	0.64753	1256	3	1253	Control	3671	11598	1970	3991	2.52597	1.97266	1.45895	7.57542	5.48843	0.0500541	0.00493137	13.9417	5.48843	-0.0476454	single-nuclei	Brain	PFC	10X 3' v3	male	557.462	366.64	Control	-0.721562	3000	1000	GSM5381311_GSE178175_cleaned_filtered
Neuron	Non-degenerative	68	GSE178175	GSM5381311	0	0	2.20985	2346	0	2346	Control		19125		5285	2.9541	1.19509		5.07886	7.49744	-0.0343443		39.0912	7.49744	0.0375994	single-nuclei	Brain	PFC	10X 3' v3	male	768.713	319.778	Control	0.784997	3000	1000	GSM5381311_GSE178175_cleaned_filtered
Oligodendrocyte	Non-degenerative	68	GSE178175	GSM5381311	0.362056	0	-0.65942	1381	5	1376	Control	3816	6769	1741	2704.5	2.49302	1.30741	1.28662	2.23983	3.68968	-0.0192845	-0.0320287	8.44549	3.68968	-0.0580897	single-nuclei	Brain	PFC	10X 3' v3	male	380.741	179.506	Control	-0.837527	3000	1000	GSM5381311_GSE178175_cleaned_filtered
OPC	Non-degenerative	68	GSE178175	GSM5381311	0.194175	0	1.04413	515	1	514	Control	12101	10791	3864	3770.5	2.99235	1.45123	0	3.86187	6.01751	-0.00664991	-0.121472	22.1284	6.01751	0.0271725	single-nuclei	Brain	PFC	10X 3' v3	male	611.089	284.63	Control	0.919595	3000	1000	GSM5381311_GSE178175_cleaned_filtered
Astrocyte	Non-degenerative	68	GSE183068	GSM5550500	0.237342	0	0.661842	1264	3	1261	Normal	3671	11690	1970	4009	2.52923	1.97266	1.45882	7.59794	5.50357	0.0641727	0.0265643	14.0658	5.50357	-0.0241277	single-nuclei	Brain	PFC	10X 3' v3	male	559.397	367.645	Control	-0.710107	3000	1000	GSM5550500_GSE183068_cleaned_filtered
Neuron	Non-degenerative	68	GSE183068	GSM5550500	0	0	2.19408	2340	0	2340	Normal		18918		5253	2.95396	1.1968		5.01111	7.47564	-0.029104		38.5521	7.47564	0.024302	single-nuclei	Brain	PFC	10X 3' v3	male	766.581	317.179	Control	0.7845	3000	1000	GSM5550500_GSE183068_cleaned_filtered
Oligodendrocyte	Non-degenerative	68	GSE183068	GSM5550500	0.289436	0	-0.641503	1382	4	1378	Normal	3537	6784	1670	2713.5	2.4956	1.29518	1.34506	2.23585	3.71045	0.0027001	-0.0181689	8.4971	3.71045	-0.0318188	single-nuclei	Brain	PFC	10X 3' v3	male	383.164	179.1	Control	-0.828457	3000	1000	GSM5550500_GSE183068_cleaned_filtered
OPC	Non-degenerative	68	GSE183068	GSM5550500	0.192308	0	1.06044	520	1	519	Normal	12101	10824	3864	3779	2.99107	1.45208	0	3.89017	6.03854	0.00742229	-0.110716	22.1599	6.03854	0.0160747	single-nuclei	Brain	PFC	10X 3' v3	male	613.295	285.164	Control	0.915087	3000	1000	GSM5550500_GSE183068_cleaned_filtered
Microglia	AD	82	GSE183068	GSM5550494	1.96078	0	-0.90156	102	2	100	AD	3589	3793.5	1929	1947.5	2.7098	2.22193	1.6083	3.31	3.4	0.0681673	0.00194243	6.24	3.4	0.0104835	single-nuclei	Brain	PFC	10X 3' v3	male	348	215	AD	-0.0746863	3000	1000	GSM5550494_GSE183068_cleaned_filtered
Astrocyte	ALS	67	GSE174332	191112_ALS_120_snRNA-A1	3.31325	0	-1.15978	332	11	321	ALS	3200	3503	1797	1879	2.52977	1.38682	1.38637	1.32399	1.09346	-0.00222043	-0.005088	4.49533	3.03427	0.0108807	single-nuclei	Brain	Motor cortex	10X 3' v3	male	313.084	109.346	ALS	-0.708188	3000	1000	191112_ALS_120_snRNA-A1_GSE174332_cleaned_filtered
Neuron	ALS	67	GSE174332	191112_ALS_120_snRNA-A1	0.107991	0	0.84759	3704	4	3700	ALS	3986.5	10021	2467	4282	2.76617	1.20335	0	2.73946	2.1673	0.0138307	-0.0535907	16.2284	5.6127	0.0205796	single-nuclei	Brain	Motor cortex	10X 3' v3	male	584.514	216.73	ALS	0.123662	3000	1000	191112_ALS_120_snRNA-A1_GSE174332_cleaned_filtered
Oligodendrocyte	ALS	67	GSE174332	191112_ALS_120_snRNA-A1	2.91262	0	-1.1641	206	6	200	ALS	3120	3473	1770.5	1928	2.56868	1.37093	0	1.205	1.085	0.0152717	-0.0156332	4.745	3.055	0.0117809	single-nuclei	Brain	Motor cortex	10X 3' v3	male	312.5	108.5	ALS	-0.57129	3000	1000	191112_ALS_120_snRNA-A1_GSE174332_cleaned_filtered
Astrocyte	Non-degenerative	67	GSE152058	4494	0.824742	0	0.181052	485	4	481	Control	4594	9430	2068.5	3301	2.45836	1.45793	2.12874	3.60707	2.17672	-0.0079858	0.0841989	11.1642	4.85239	0.061471	single-nuclei	Brain	Caudate Putamen	10X 3' v3	male	494.387	217.672	Control	-0.959482	3000	1000	4494_GSE152058_cleaned_filtered
Microglia	AD	79	GSE148822	Donor11	2.50627	0	-0.929545	399	10	389	AD	3348.5	3268	1861.5	1812	2.82214	1.99404	2.08993	2.41388	1.79692	-0.0106989	-0.0228435	5.92288	3.33419	0.118968	single-nuclei	Brain	occipital cortex occipitotemporal cortex	10X 3' v3	male	344.216	179.692	AD	0.320625	3000	1000	Donor11_GSE148822_cleaned_filtered
Neuron	Non-degenerative	67	GSE152058	4494	0.0538213	0	1.07881	1858	1	1857	Control	3765	14664	1738	3994	2.77787	1.14377	1.84247	3.34733	2.0657	-0.0351257	0.0628801	22.531	5.8503	0.107097	single-nuclei	Brain	Caudate Putamen	10X 3' v3	male	615.778	206.57	Control	0.164856	3000	1000	4494_GSE152058_cleaned_filtered
Oligodendrocyte	Non-degenerative	67	GSE152058	4494	3.16742	0	-1.21767	884	28	856	Control	3376.5	4772	1637	2092.5	2.37801	1.18728	0.583584	1.41939	1.10164	-0.00295902	-0.0167726	5.60631	2.94159	0.0402322	single-nuclei	Brain	Caudate Putamen	10X 3' v3	male	305.257	110.164	Control	-1.24222	3000	1000	4494_GSE152058_cleaned_filtered
Astrocyte	PD	67	GSE189202	GSM5696061	0.82397	0	0.327578	1335	11	1324	GBA N370S/WT - heterozygous for GBA	4602	11593.5	2203	3786	2.43263	2.02972	2.00148	7.82931	5.06571	0.070371	0.0781878	12.3988	5.06571	-0.00917392	single-nuclei	Brain	Cingulate gyrus	10X 3' v3	male	514.199	348.338	PD	-1.05003	3000	1000	GSM5696061_GSE189202_cleaned_filtered
Oligodendrocyte	PD	67	GSE189202	GSM5696061	0.650255	0	-0.479996	2153	14	2139	GBA N370S/WT - heterozygous for GBA	3681	7467	1770	2711	2.5455	1.27843	0.584959	2.3899	3.92099	-0.00382729	-0.0299483	10.4301	3.92099	-0.00537141	single-nuclei	Brain	Cingulate gyrus	10X 3' v3	male	405.002	181.861	PD	-0.652861	3000	1000	GSM5696061_GSE189202_cleaned_filtered
OPC	PD	67	GSE189202	GSM5696061	0.218818	0	1.28162	457	1	456	GBA N370S/WT - heterozygous for GBA	6910	13463	2775	4034	3.13001	1.33882	1.35953	3.83991	6.32018	-0.00620885	-0.00417468	30.1732	6.32018	0.0855524	single-nuclei	Brain	Cingulate gyrus	10X 3' v3	male	643.202	255.044	PD	1.40401	3000	1000	GSM5696061_GSE189202_cleaned_filtered
Astrocyte	Other dementias	67	GSE173731	4494	0.328407	0	0.394357	609	2	607	Dementia	6876	9191	2786.5	3418	2.58702	1.45541	0.899299	3.42834	5.17628	0.0131783	-0.0180367	12.4201	5.17628	0.0209114	single-nuclei	Brain	Caudate Putamen	10X 3' v3	male	523.229	221.746	Dementia	-0.506762	3000	1000	4494_GSE173731_cleaned_filtered
Microglia	PD	77	GSE157783	IPD3	1.50376	0	-0.855719	133	2	131	IPD	3454.5	3496	1844	1896	2.95339	2.11981	0.976875	2.9771	2.09924	0.0591687	-0.0150425	7.32824	3.51145	0.0953217	single-nuclei	Brain	Midbrain	10X 3' v3	male	354.198	209.924	PD	0.782484	3000	1000	IPD3_GSE157783_cleaned_filtered
Oligodendrocyte	Other dementias	67	GSE173731	4494	3.83562	0	-1.12591	365	14	351	Dementia	3456.5	4235	1773.5	2029	2.45023	1.27276	0	1.61254	3.14245	0.00804541	-0.0161751	6.52991	3.14245	-0.0452003	single-nuclei	Brain	Caudate Putamen	10X 3' v3	male	317.664	123.647	Dementia	-0.988112	3000	1000	4494_GSE173731_cleaned_filtered
Astrocyte	Other dementias	66	GSE174332	191113_FTLD_216_snRNA-H3	0	0	-0.670484	106	0	106	FTLD		4996.5		2291.5	2.58066	1.42938		1.91509	1.41509	0.00660026		6.46226	3.74528	0.0134204	single-nuclei	Brain	Motor cortex	10X 3' v3	male	379.245	141.509	LBD/FTLD	-0.529135	3000	1000	191113_FTLD_216_snRNA-H3_GSE174332_cleaned_filtered
Neuron	Other dementias	66	GSE174332	191113_FTLD_216_snRNA-H3	0	0	1.58118	669	0	669	FTLD		14772		4698	2.87011	0.996782		2.72197	2.00897	0.00509257		26.2481	6.68311	0.0308683	single-nuclei	Brain	Motor cortex	10X 3' v3	male	683.707	200.897	LBD/FTLD	0.489427	3000	1000	191113_FTLD_216_snRNA-H3_GSE174332_cleaned_filtered
Oligodendrocyte	Other dementias	66	GSE174332	191113_FTLD_216_snRNA-H3	1.37184	0	-0.97971	4155	57	4098	FTLD	3730	4663	1987	2283	2.48651	1.09861	1.25941	1.102	0.965349	-0.00902824	0.00215929	5.68912	3.29746	0.00866791	single-nuclei	Brain	Motor cortex	10X 3' v3	male	337.433	96.5349	LBD/FTLD	-0.860426	3000	1000	191113_FTLD_216_snRNA-H3_GSE174332_cleaned_filtered
Astrocyte	Other dementias	66	GSE174332	191113_FTLD_228_snRNA-E5	1.05263	0	-0.544528	190	2	188	FTLD	4187.5	6052.5	2062.5	2771	2.49909	1.62394	0.608242	2.69681	2.02128	0.0179175	-0.0499707	7.02128	3.85638	0.00890363	single-nuclei	Brain	Motor cortex	10X 3' v3	male	396.277	202.128	LBD/FTLD	-0.816161	3000	1000	191113_FTLD_228_snRNA-E5_GSE174332_cleaned_filtered
Neuron	Other dementias	66	GSE174332	191113_FTLD_228_snRNA-E5	0.141044	0	1.91373	709	1	708	FTLD	12789	18950	4436	5798.5	2.7514	1.11294	1.41772	4.18644	2.89831	0.00754025	0.0427914	28.7076	7.08898	0.0217197	single-nuclei	Brain	Motor cortex	10X 3' v3	male	728.672	289.831	LBD/FTLD	0.0717009	3000	1000	191113_FTLD_228_snRNA-E5_GSE174332_cleaned_filtered
Oligodendrocyte	Other dementias	66	GSE174332	191113_FTLD_228_snRNA-E5	1.65531	0	-0.894824	2054	34	2020	FTLD	4113	5033	2097	2366.5	2.50955	1.19102	1.1707	1.39109	1.17673	0.00296416	-0.00504125	6.16238	3.37574	0.0101426	single-nuclei	Brain	Motor cortex	10X 3' v3	male	348.911	117.673	LBD/FTLD	-0.779346	3000	1000	191113_FTLD_228_snRNA-E5_GSE174332_cleaned_filtered
Neuron	Other dementias	66	GSE174332	191113_FTLD_229_snRNA-E6	0	0	0.82482	237	0	237	FTLD		10224		3365	2.9179	0.945003		1.90717	1.43038	0.00759534		20.6414	5.70042	0.0317793	single-nuclei	Brain	Motor cortex	10X 3' v3	male	581.435	143.038	LBD/FTLD	0.657605	3000	1000	191113_FTLD_229_snRNA-E6_GSE174332_cleaned_filtered
Oligodendrocyte	Other dementias	66	GSE174332	191113_FTLD_229_snRNA-E6	3.07263	0	-1.31196	716	22	694	FTLD	4420	4457	1871	1937.5	2.44603	1.08215	0.525613	1.08646	0.887608	0.00385407	0.00188756	5.29971	2.82421	0.0084264	single-nuclei	Brain	Motor cortex	10X 3' v3	male	292.507	88.7608	LBD/FTLD	-1.00288	3000	1000	191113_FTLD_229_snRNA-E6_GSE174332_cleaned_filtered
OPC	Other dementias	66	GSE174332	200721_FTLD_229_snRNA-B2	0	0	-0.529742	116	0	116	FTLD		4374		1973	2.97713	1.26068		1.23276	1.01724	-0.00316614		9.06897	3.64655	0.0318197	single-nuclei	Brain	Motor cortex	10X 3' v3	male	398.276	101.724	LBD/FTLD	0.866041	3000	1000	200721_FTLD_229_snRNA-B2_GSE174332_cleaned_filtered
Astrocyte	Non-degenerative	66	GSE148822	Donor2	2.26394	0	-0.90014	3622	82	3540	None	3634.5	4731.5	1860.5	2274	2.51382	1.48251	1.42872	2.01186	1.64576	-0.0700206	-0.0630766	5.85028	3.36949	0.0854922	single-nuclei	Brain	occipital cortex occipitotemporal cortex	10X 3' v3	male	348.192	164.576	Control	-0.764331	3000	1000	Donor2_GSE148822_cleaned_filtered
Neuron	Non-degenerative	66	GSE148822	Donor2	1.35135	0	-0.167475	148	2	146	None	5011	4597	2407.5	2353.5	2.76185	1.35509	0.49335	1.63699	1.39726	-0.0948297	-0.160798	7.63014	3.99315	0.124575	single-nuclei	Brain	occipital cortex occipitotemporal cortex	10X 3' v3	male	447.26	139.726	Control	0.108483	3000	1000	Donor2_GSE148822_cleaned_filtered
Oligodendrocyte	Non-degenerative	66	GSE148822	Donor2	3.47826	0	-1.39646	115	4	111	None	3297.5	3332	1687	1745	2.55925	1.38278	1.24587	1.22523	1.05405	-0.0769902	-0.0817934	4.54955	2.71171	0.078696	single-nuclei	Brain	occipital cortex occipitotemporal cortex	10X 3' v3	male	281.081	105.405	Control	-0.604483	3000	1000	Donor2_GSE148822_cleaned_filtered
Astrocyte	PD	66	GSE157783	IPD2	1.81818	0	-0.970464	495	9	486	IPD	3835	4878.5	2057	2449	2.3896	1.97657	2.02795	3.42387	2.32922	0.0378855	0.0382323	5.79424	3.37654	0.00641411	single-nuclei	Brain	Midbrain	10X 3' v3	male	338.683	232.922	PD	-1.20144	3000	1000	IPD2_GSE157783_cleaned_filtered
Microglia	Other dementias	75	GSE174332	201025_FTLD_240_snRNA-C12	0	0	-0.113597	154	0	154	FTLD		3709.5		2027.5	3.19727	2.11147		2.96104	2.11688	-0.0240962		9.7013	4.44805	0.0406027	single-nuclei	Brain	Motor cortex	10X 3' v3	male	454.545	211.688	LBD/FTLD	1.64067	3000	1000	201025_FTLD_240_snRNA-C12_GSE174332_cleaned_filtered
Oligodendrocyte	PD	66	GSE157783	IPD2	1.53772	0	-0.665696	2081	32	2049	IPD	3744.5	6655	1876	2824	2.47972	1.40919	1.33896	2.53978	1.94924	0.00330332	0.00726536	8.66715	3.78477	-0.00244767	single-nuclei	Brain	Midbrain	10X 3' v3	male	379.893	194.924	PD	-0.884326	3000	1000	IPD2_GSE157783_cleaned_filtered
Microglia	HD	72	GSE152058	2030	1.45278	0	-0.558784	413	6	407	HD	3720.5	3869	2008.5	2050	2.8525	1.97697	1.25953	2.97789	2.11302	0.0473335	0.000562878	7.36609	3.88943	0.1092	single-nuclei	Brain	Caudate Putamen	10X 3' v3	male	394.349	211.302	HD	0.427447	3000	1000	2030_GSE152058_cleaned_filtered
Neuron	Non-degenerative	65	GSE174332	191114_PN_318_snRNA-F3	0	0	1.44218	171	0	171	Control		16930		4846	2.79661	1.00397		3.30994	2.20468	0.00775312		29.6784	6.52047	0.0259388	single-nuclei	Brain	Motor cortex	10X 3' v3	male	664.912	220.468	Control	0.230803	3000	1000	191114_PN_318_snRNA-F3_GSE174332_cleaned_filtered
Oligodendrocyte	Non-degenerative	65	GSE174332	191114_PN_318_snRNA-F3	1.30719	0	-1.04105	153	2	151	Control	4113	4816	2112	2304	2.47937	1.20737	1.23387	1.39073	1.11921	0.000125518	-0.00597294	6.13907	3.16556	0.00922431	single-nuclei	Brain	Motor cortex	10X 3' v3	male	329.139	111.921	Control	-0.88556	3000	1000	191114_PN_318_snRNA-F3_GSE174332_cleaned_filtered
Neuron	HD	65	GSE152058	3881	0.206044	0	0.548825	1456	3	1453	HD	3231	10495	1843	3436	2.73264	1.17307	0	2.8128	1.8424	-0.0308325	-0.0532028	17.4763	5.20303	0.0936564	single-nuclei	Brain	Putamen Caudate	10X 3' v3	male	544.116	184.24	HD	0.00568971	3000	1000	3881_GSE152058_cleaned_filtered
Astrocyte	AD	65	GSE183068	GSM5550454	2.48447	0	-1.26361	322	8	314	AD/CAA	3570.5	4219	1841	2091.5	2.32322	1.82987	1.85554	2.67197	2.96815	0.0372859	0.0442645	4.8758	2.96815	-0.0457319	single-nuclei	Brain	PFC	10X 3' v3	male	299.045	178.662	AD	-1.43504	3000	1000	GSM5550454_GSE183068_cleaned_filtered
Astrocyte	AD	65	GSE183068	GSM5550455	0.851393	0	0.205246	1292	11	1281	AD/CAA	6048	8323	2671	3272	2.56241	1.85998	1.75403	5.03669	4.89774	0.04807	0.0354844	10.8517	4.89774	-0.0231135	single-nuclei	Brain	PFC	10X 3' v3	male	497.658	294.926	AD	-0.59333	3000	1000	GSM5550455_GSE183068_cleaned_filtered
Microglia	PD	72	GSE189202	GSM5696060	1.19904	0	-0.71983	417	5	412	GBA N370S/WT - heterozygous for GBA	3601	3798	1793	1986	2.79032	2.58977	2.21399	5.52913	3.67718	0.150353	0.00502796	6.48301	3.67718	0.0469867	single-nuclei	Brain	Cingulate gyrus	10X 3' v3	male	372.573	295.631	PD	0.208647	3000	1000	GSM5696060_GSE189202_cleaned_filtered
Microglia	HD	72	GSE173731	2030	0.49505	0	-0.22632	404	2	402	HD	4167	4792	2065	2347.5	2.97032	1.92154	0.703602	3.40547	4.30348	0.0506926	-0.0505598	10.5323	4.30348	0.120686	single-nuclei	Brain	Caudate Putamen	10X 3' v3	male	439.303	230.348	HD	0.842048	3000	1000	2030_GSE173731_cleaned_filtered
Neuron	AD	65	GSE183068	GSM5550454	0.46225	0	1.01249	649	3	646	AD/CAA	3308	11941	1669	3763.5	2.75227	1.21663	0	3.75232	5.96594	-0.0166704	-0.0477929	24.3591	5.96594	-0.00481528	single-nuclei	Brain	PFC	10X 3' v3	male	606.811	230.495	AD	0.07476	3000	1000	GSM5550454_GSE183068_cleaned_filtered
Neuron	AD	65	GSE183068	GSM5550455	0.106383	0	1.73318	940	1	939	AD/CAA	3639	18148	1791	5045	2.82506	1.21588	1.32122	4.67625	6.88392	-0.0243559	-0.00116384	32.6667	6.88392	0.00438269	single-nuclei	Brain	PFC	10X 3' v3	male	704.26	292.545	AD	0.33089	3000	1000	GSM5550455_GSE183068_cleaned_filtered
Oligodendrocyte	AD	65	GSE183068	GSM5550454	0.627878	0	-0.444094	2389	15	2374	AD/CAA	5412	8985	2317	3021	2.42497	1.1584	1.2124	2.64869	3.97262	-0.0103448	0.000868322	11.4528	3.97262	-0.0438548	single-nuclei	Brain	PFC	10X 3' v3	male	409.857	187.195	AD	-1.07699	3000	1000	GSM5550454_GSE183068_cleaned_filtered
Oligodendrocyte	AD	65	GSE183068	GSM5550455	0.578436	0	0.0165498	4322	25	4297	AD/CAA	4990	10589	2174	3396	2.441	1.36776	1.50167	3.61485	4.43682	0.00609082	0.0233773	12.5453	4.43682	-0.0365849	single-nuclei	Brain	PFC	10X 3' v3	male	472.143	252.199	AD	-1.02058	3000	1000	GSM5550455_GSE183068_cleaned_filtered
OPC	AD	65	GSE183068	GSM5550454	0.634921	0	0.0689834	315	2	313	AD/CAA	3984	6042	1755.5	2434	3.17537	1.39225	0.808015	2.43131	4.75719	0.0145666	-0.0212531	16.8626	4.75719	0.0256395	single-nuclei	Brain	PFC	10X 3' v3	male	479.233	169.968	AD	1.56364	3000	1000	GSM5550454_GSE183068_cleaned_filtered
Astrocyte	HD	65	GSE173731	3881	0.65189	0	0.561286	767	5	762	HD	4543	9651	1931	3323	2.59884	1.81204	1.74253	5.58399	5.39633	0.054315	0.0165292	13.7375	5.39633	0.0378067	single-nuclei	Brain	Caudate Putamen	10X 3' v3	male	545.801	278.609	HD	-0.465134	3000	1000	3881_GSE173731_cleaned_filtered
Neuron	HD	65	GSE173731	3881	0	0	1.5236	1412	0	1412	HD		18824.5		4821.5	2.90841	1.19818		5.03683	6.70113	-0.00974233		36.8152	6.70113	0.0753535	single-nuclei	Brain	Caudate Putamen	10X 3' v3	male	675.921	275.425	HD	0.624196	3000	1000	3881_GSE173731_cleaned_filtered
Astrocyte	ALS	64	GSE174332	191112_ALS_118_snRNA-C4	0	0	-0.635848	112	0	112	ALS		3647.5		1995	2.81934	1.33047		1.16964	1	-0.0101301		6.23214	3.79464	0.0206736	single-nuclei	Brain	Motor cortex	10X 3' v3	male	383.929	100	ALS	0.310781	3000	1000	191112_ALS_118_snRNA-C4_GSE174332_cleaned_filtered
Neuron	ALS	64	GSE174332	191112_ALS_118_snRNA-C4	0	0	1.50098	3497	0	3497	ALS		14140		4572	2.91293	1.00676		2.77495	2.07378	0.00792765		26.3083	6.5702	0.0303008	single-nuclei	Brain	Motor cortex	10X 3' v3	male	672.862	207.378	ALS	0.640117	3000	1000	191112_ALS_118_snRNA-C4_GSE174332_cleaned_filtered
Oligodendrocyte	ALS	64	GSE174332	191112_ALS_118_snRNA-C4	1.15258	0	-0.867674	1822	21	1801	ALS	3331	3649	1817	1956	2.744	1.14699	1.26158	0.87729	0.800666	-0.00413224	-0.00177242	5.99445	3.44475	0.0190813	single-nuclei	Brain	Motor cortex	10X 3' v3	male	352.582	80.0666	ALS	0.0456412	3000	1000	191112_ALS_118_snRNA-C4_GSE174332_cleaned_filtered
OPC	ALS	64	GSE174332	191112_ALS_118_snRNA-C4	0	0	0.198836	187	0	187	ALS		4824		2388	3.32187	1.16246		1.27273	1.09091	-0.0163084		13.2674	4.39037	0.0452511	single-nuclei	Brain	Motor cortex	10X 3' v3	male	496.791	109.091	ALS	2.07913	3000	1000	191112_ALS_118_snRNA-C4_GSE174332_cleaned_filtered
Neuron	Non-degenerative	64	GSE144136	17_Suicide	0.515464	0	-0.594587	776	4	772		3608.5	3860	1943	2044.5	2.74499	1.20376	0	1.01554	0.937824	-0.0146228	-0.0497536	6.34715	3.89249	0.00371733	single-nuclei	Brain	DLPFC	10X 3' v2	male	389.508	93.7824	Control	0.0491575	3000	1000	17_Suicide_GSE144136_cleaned_filtered
Astrocyte	AD	64	GSE183068	GSM5550488	0.23166	0	0.424054	1295	3	1292	AD	9998	10768.5	3307	3654.5	2.51319	1.94977	1.38644	6.80573	5.20046	0.0603411	0.0275286	12.7639	5.20046	-0.0237277	single-nuclei	Brain	PFC	10X 3' v3	male	527.245	342.337	AD	-0.766532	3000	1000	GSM5550488_GSE183068_cleaned_filtered
Microglia	Non-degenerative	70	GSE152058	4308	1.38408	0	-0.382054	289	4	285	Control	4286.5	4466	2241	2314	2.9208	1.97483	1.3178	3.35088	2.34386	0.0542117	-0.0319532	8.58246	4.10175	0.113338	single-nuclei	Brain	Caudate Putamen	10X 3' v3	male	418.246	234.386	Control	0.667817	3000	1000	4308_GSE152058_cleaned_filtered
Neuron	AD	64	GSE183068	GSM5550488	0.0593824	0	2.715	3368	2	3366	AD	3604.5	22156.5	1986	5919.5	2.96019	1.14085	2.24005	4.96732	8.15746	-0.0435359	0.0293572	41.2626	8.15746	0.0257504	single-nuclei	Brain	PFC	10X 3' v3	male	837.017	341.949	AD	0.80643	3000	1000	GSM5550488_GSE183068_cleaned_filtered
Oligodendrocyte	AD	64	GSE183068	GSM5550488	0.77101	0	-0.834765	1297	10	1287	AD	4282	5253	2102	2374	2.61135	1.30837	1.20664	1.72883	3.48563	0.000339807	-0.0176462	7.28438	3.48563	-0.0215051	single-nuclei	Brain	PFC	10X 3' v3	male	357.032	146.154	AD	-0.421132	3000	1000	GSM5550488_GSE183068_cleaned_filtered
OPC	AD	64	GSE183068	GSM5550488	0.250627	0	1.0829	399	1	398	AD	7793	8522.5	3074	3329.5	3.10583	1.34315	0.825579	2.66583	6.09548	-0.00676458	-0.0663337	18.8719	6.09548	0.0372418	single-nuclei	Brain	PFC	10X 3' v3	male	616.332	212.06	AD	1.3189	3000	1000	GSM5550488_GSE183068_cleaned_filtered
Astrocyte	ALS	63	GSE174332	191112_ALS_129_snRNA-A2	2.09205	0	-0.908893	239	5	234	ALS	3393	3797.5	1904	2110	2.63122	1.57934	1.95323	1.89316	1.61538	0.0164431	0.0342237	5.40171	3.38462	0.0121384	single-nuclei	Brain	Motor cortex	10X 3' v3	male	347.009	161.538	ALS	-0.351192	3000	1000	191112_ALS_129_snRNA-A2_GSE174332_cleaned_filtered
Neuron	ALS	63	GSE174332	191112_ALS_129_snRNA-A2	0.0290782	0	1.35126	3439	1	3438	ALS	6920	12494	3078	4875.5	2.77599	1.17219	0	3.16463	2.43514	0.00999625	-0.0501647	20.3514	6.30425	0.0216594	single-nuclei	Brain	Motor cortex	10X 3' v3	male	652.618	243.514	ALS	0.158225	3000	1000	191112_ALS_129_snRNA-A2_GSE174332_cleaned_filtered
Oligodendrocyte	ALS	63	GSE174332	191112_ALS_129_snRNA-A2	2.04991	0	-0.940267	1122	23	1099	ALS	3701	3688	2051	2017	2.64236	1.30474	1.24215	1.21929	1.05641	0.00926679	-0.000689392	5.52138	3.32757	0.0152733	single-nuclei	Brain	Motor cortex	10X 3' v3	male	342.766	105.641	ALS	-0.312007	3000	1000	191112_ALS_129_snRNA-A2_GSE174332_cleaned_filtered
OPC	ALS	63	GSE174332	191112_ALS_129_snRNA-A2	0	0	-0.114902	206	0	206	ALS		4373		2336	3.19851	1.31633		1.42233	1.23786	-0.0101388		10.7767	4.03883	0.0354124	single-nuclei	Brain	Motor cortex	10X 3' v3	male	454.369	123.786	ALS	1.64507	3000	1000	191112_ALS_129_snRNA-A2_GSE174332_cleaned_filtered
Astrocyte	AD	63	GSE157827	AD21	0.833333	0	-1.26276	120	1	119	AD	3171	3624	1985	1987	2.39314	1.45264	0	1.67227	1.21849	0.0104553	-0.10651	4.18487	2.94958	0.0123977	single-nuclei	Brain	Prefrontal cortex	10X 3' v3	male	299.16	121.849	AD	-1.18901	3000	1000	AD21_GSE157827_cleaned_filtered
Neuron	AD	63	GSE157827	AD21	1.05853	0	-0.415063	1606	17	1589	AD	3468	5256	2005	2650	2.56828	1.19405	1.38525	1.53682	1.29012	-0.00815873	-0.0117688	7.53241	4.12272	0.0202082	single-nuclei	Brain	Prefrontal cortex	10X 3' v3	male	413.782	129.012	AD	-0.572694	3000	1000	AD21_GSE157827_cleaned_filtered
OPC	AD	63	GSE157827	AD21	0.390625	0	-0.145763	256	1	255	AD	3559	3802	1913	2032	3.15611	1.32082	1.33757	1.33333	1.14118	0.0113597	0.00774072	9.67843	4.46275	0.122703	single-nuclei	Brain	Prefrontal cortex	10X 3' v3	male	450.196	114.118	AD	1.49586	3000	1000	AD21_GSE157827_cleaned_filtered
Neuron	Non-degenerative	62	GSE174332	191114_PN_317_snRNA-F2	0	0	1.57254	1174	0	1174	Control		17174.5		5629.5	2.80356	1.20181		4.33816	3.09114	0.0160318		27.5613	6.5937	0.0213913	single-nuclei	Brain	Motor cortex	10X 3' v3	male	682.538	309.114	Control	0.255231	3000	1000	191114_PN_317_snRNA-F2_GSE174332_cleaned_filtered
Oligodendrocyte	Non-degenerative	62	GSE174332	191114_PN_317_snRNA-F2	0.736842	0	-1.02009	1900	14	1886	Control	3266	4064	1808.5	2088.5	2.6174	1.31094	1.40168	1.37275	1.19459	0.0147224	0.0156254	5.92577	3.2508	0.0133282	single-nuclei	Brain	Motor cortex	10X 3' v3	male	331.972	119.459	Control	-0.399847	3000	1000	191114_PN_317_snRNA-F2_GSE174332_cleaned_filtered
OPC	Non-degenerative	62	GSE174332	191114_PN_317_snRNA-F2	0.584795	0	-0.134162	171	1	170	Control	3717	4921	2022	2499.5	3.1736	1.35035	1.30572	1.70588	1.39412	-0.00576518	-0.0148972	12.2588	4.08235	0.0354295	single-nuclei	Brain	Motor cortex	10X 3' v3	male	451.765	139.412	Control	1.5574	3000	1000	191114_PN_317_snRNA-F2_GSE174332_cleaned_filtered
Astrocyte	Other dementias	62	GSE174332	201025_FTLD_239_snRNA-C11	2	0	-0.808789	150	3	147	FTLD	3252	4074	1964	2227	2.57985	1.42637	2.02824	1.78231	1.46259	0.00644661	0.0414565	5.55102	3.4898	0.0113568	single-nuclei	Brain	Motor cortex	10X 3' v3	male	360.544	146.259	LBD/FTLD	-0.531986	3000	1000	201025_FTLD_239_snRNA-C11_GSE174332_cleaned_filtered
Neuron	Other dementias	62	GSE174332	201025_FTLD_239_snRNA-C11	0	0	1.90855	715	0	715	FTLD		18258		5427	2.84585	1.05685		3.71049	2.52448	0.00758064		29.4895	7.06014	0.0261563	single-nuclei	Brain	Motor cortex	10X 3' v3	male	727.972	252.448	LBD/FTLD	0.404069	3000	1000	201025_FTLD_239_snRNA-C11_GSE174332_cleaned_filtered
Oligodendrocyte	Other dementias	62	GSE174332	201025_FTLD_239_snRNA-C11	0.74813	0	-0.884911	401	3	398	FTLD	3242	3983	1772	2052.5	2.63575	1.26806	1.4072	1.25126	1.0804	0.0108876	0.0432361	5.82663	3.38945	0.0156901	single-nuclei	Brain	Motor cortex	10X 3' v3	male	350.251	108.04	LBD/FTLD	-0.335264	3000	1000	201025_FTLD_239_snRNA-C11_GSE174332_cleaned_filtered
Microglia	Non-degenerative	70	GSE173731	4308	1.21065	0	-0.431797	413	5	408	Leukemia	3824	4153.5	2006	2233	3.00565	1.95444	1.36104	2.83578	4.06618	0.0481558	-0.00585543	8.83578	4.06618	0.11035	single-nuclei	Brain	Caudate Putamen	10X 3' v3	male	411.52	206.373	Leukemia	0.966405	3000	1000	4308_GSE173731_cleaned_filtered
Microglia	Non-degenerative	69	GSE157760	A	1.0582	0	-0.607952	189	2	187	Control	3453.5	4183	1814	2157	2.74877	2.80235	1.94212	6.87166	2.80749	0.116989	-0.00608614	6.82888	3.77005	0.0173531	single-nuclei	Brain	Cortex	10X 3' v3	male	387.701	280.749	Control	0.0624533	3000	1000	A_GSE157760_cleaned_filtered
Astrocyte	HD	61	GSE152058	3730	0.884956	0	0.184597	452	4	448	HD	4456	9896	2113.5	3375	2.55864	1.82254	1.36501	5.8817	2.80804	0.0322613	0.0106737	13.5491	4.82143	0.0693888	single-nuclei	Brain	Caudate	10X 3' v3	male	494.866	280.804	HD	-0.6066	3000	1000	3730_GSE152058_cleaned_filtered
Oligodendrocyte	HD	61	GSE152058	3730	2.93255	0	-1.1169	1364	40	1324	HD	4153.5	5772	1776.5	2218.5	2.31854	1.26504	1.38527	1.93429	1.41012	0.00205562	0.00994925	6.80136	3.06949	0.0378366	single-nuclei	Brain	Caudate	10X 3' v3	male	318.882	141.012	HD	-1.4515	3000	1000	3730_GSE152058_cleaned_filtered
Astrocyte	Non-degenerative	61	GSE178175	GSM5381312	0.238095	0	0.645001	1260	3	1257	Control	3671	11605	1970	3997	2.5317	1.9738	1.45895	7.56006	5.48449	0.0502831	0.00493137	13.9443	5.48449	-0.0471551	single-nuclei	Brain	PFC	10X 3' v3	male	557.12	366.508	Control	-0.701414	3000	1000	GSM5381312_GSE178175_cleaned_filtered
Neuron	Non-degenerative	61	GSE178175	GSM5381312	0	0	2.22031	2360	0	2360	Control		19271.5		5327.5	2.95365	1.19562		5.09915	7.50847	-0.034491		39.2852	7.50847	0.0374878	single-nuclei	Brain	PFC	10X 3' v3	male	770.127	320.339	Control	0.783411	3000	1000	GSM5381312_GSE178175_cleaned_filtered
Oligodendrocyte	Non-degenerative	61	GSE178175	GSM5381312	0.361795	0	-0.666299	1382	5	1377	Control	3816	6768	1741	2702	2.49605	1.3086	1.28662	2.22004	3.6841	-0.0193754	-0.0320287	8.39579	3.6841	-0.0580572	single-nuclei	Brain	PFC	10X 3' v3	male	379.811	178.068	Control	-0.82686	3000	1000	GSM5381312_GSE178175_cleaned_filtered
OPC	Non-degenerative	61	GSE178175	GSM5381312	0.192308	0	1.06187	520	1	519	Control	12101	10823	3864	3776	2.99381	1.4464	0	3.87861	6.04239	-0.00664504	-0.121472	22.2505	6.04239	0.0278454	single-nuclei	Brain	PFC	10X 3' v3	male	613.487	285.164	Control	0.924731	3000	1000	GSM5381312_GSE178175_cleaned_filtered
Astrocyte	MS	61	GSE179590	S8	0.2849	0	-0.23596	351	1	350	MS	3884	6852	2107	3055.5	2.49646	1.82116	1.81634	4.11714	4.31143	0.0342855	0.0402033	8.19714	4.31143	0.0751607	single-nuclei	Brain	DLPFC	10X 3' v3	male	438	263.429	MS	-0.825429	3000	1000	S8_GSE179590_cleaned_filtered
Oligodendrocyte	MS	61	GSE179590	S8	0.966356	0	-0.922985	2794	27	2767	MS	4348	5551	2162	2496	2.52225	1.19647	1.34887	1.60571	3.37477	0.000731701	0.0124662	7.22877	3.37477	0.0765247	single-nuclei	Brain	DLPFC	10X 3' v3	male	345.103	134.586	MS	-0.734657	3000	1000	S8_GSE179590_cleaned_filtered
Astrocyte	Non-degenerative	61	GSE183068	GSM5550502	0.255102	0	0.108448	1176	3	1173	Normal	3911	9408	1923	3170	2.54847	1.79888	1.44467	5.11083	4.79199	0.0437313	0.0389597	11.3478	4.79199	-0.0226123	single-nuclei	Brain	PFC	10X 3' v3	male	484.569	257.886	Control	-0.64241	3000	1000	GSM5550502_GSE183068_cleaned_filtered
Neuron	Non-degenerative	61	GSE183068	GSM5550502	0.0348311	0	2.33378	2871	1	2870	Normal	3757	20698	2075	5513	2.96258	1.0566	1.29793	4.3223	7.6885	-0.0449723	-0.0510096	40.3463	7.6885	0.0224927	single-nuclei	Brain	PFC	10X 3' v3	male	785.47	295.401	Control	0.814832	3000	1000	GSM5550502_GSE183068_cleaned_filtered
Oligodendrocyte	Non-degenerative	61	GSE183068	GSM5550502	3.37423	0	-1.19081	326	11	315	Normal	3899	4778	1742	2099	2.48837	1.18263	1.6751	1.31429	3.04127	-0.00629967	0.031033	5.86349	3.04127	-0.0328045	single-nuclei	Brain	PFC	10X 3' v3	male	308.889	110.794	Control	-0.853901	3000	1000	GSM5550502_GSE183068_cleaned_filtered
OPC	Non-degenerative	61	GSE183068	GSM5550502	0.543478	0	0.731768	368	2	366	Normal	5286	8202.5	2344	3095	3.21811	1.26431	0.802751	2.32514	5.62842	-0.0102096	-0.0341103	20.8197	5.62842	0.0402623	single-nuclei	Brain	PFC	10X 3' v3	male	568.852	176.23	Control	1.71402	3000	1000	GSM5550502_GSE183068_cleaned_filtered
Astrocyte	HD	61	GSE173731	3730	0.472441	0	-0.0968949	635	3	632	HD	3607	6834.5	1929	2795	2.60324	1.84204	1.32771	4.40506	4.50633	0.0533719	-0.00488222	10.1835	4.50633	0.0314573	single-nuclei	Brain	Caudate	10X 3' v3	male	456.804	242.089	HD	-0.449678	3000	1000	3730_GSE173731_cleaned_filtered
Oligodendrocyte	HD	61	GSE173731	3730	4.02685	0	-1.50479	149	6	143	HD	3638.5	4414	1804	1945	2.3478	1.36212	1.23921	1.67133	2.62238	0.0148498	0.00551368	5.02098	2.62238	-0.0592368	single-nuclei	Brain	Caudate	10X 3' v3	male	266.434	125.175	HD	-1.34855	3000	1000	3730_GSE173731_cleaned_filtered
Astrocyte	ALS	60	GSE174332	191112_ALS_117_snRNA-C3	1.63488	0	-1.107	367	6	361	ALS	3169.5	3512	1776	1940	2.60995	1.3658	1.4248	1.21053	1.08587	-0.00623918	-0.0110549	5.01662	3.10249	0.0109943	single-nuclei	Brain	Motor cortex	10X 3' v3	male	320.222	108.587	ALS	-0.426042	3000	1000	191112_ALS_117_snRNA-C3_GSE174332_cleaned_filtered
Neuron	ALS	60	GSE174332	191112_ALS_117_snRNA-C3	0.0619579	0	0.954633	4842	3	4839	ALS	3401	9851	2005	4077	2.78372	0.992541	0	1.99793	1.67183	9.81168e-05	-0.0285194	16.4782	5.78777	0.0233	single-nuclei	Brain	Motor cortex	10X 3' v3	male	598.987	167.183	ALS	0.185435	3000	1000	191112_ALS_117_snRNA-C3_GSE174332_cleaned_filtered
Oligodendrocyte	ALS	60	GSE174332	191112_ALS_117_snRNA-C3	2.40674	0	-1.07325	831	20	811	ALS	3178	3470	1789	1897	2.62141	1.14567	0	0.843403	0.774353	-0.0039872	-0.0118978	5.04686	3.16893	0.0149192	single-nuclei	Brain	Motor cortex	10X 3' v3	male	324.784	77.4353	ALS	-0.385729	3000	1000	191112_ALS_117_snRNA-C3_GSE174332_cleaned_filtered
Astrocyte	Non-degenerative	60	GSE148822	Donor4	2.18831	0	-1.04014	3473	76	3397	None	3353.5	3885	1754.5	1949	2.54777	1.46352	1.43132	1.75449	1.45157	-0.0646642	-0.0548328	5.0995	3.22579	0.0914151	single-nuclei	Brain	occipital cortex occipitotemporal cortex	10X 3' v3	male	329.261	145.157	Control	-0.644867	3000	1000	Donor4_GSE148822_cleaned_filtered
Astrocyte	Non-degenerative	60	GSE167494	GSM5106117	0	0	0.481051	103	0	103	Non-symptomatic		10064		3970	2.5343	1.77143		5.33981	5.19417	0.042083		11.7476	5.19417	0.00849932	single-nuclei	Brain	DLPFC	10X 3' v3	male	534.951	328.155	Control	-0.692247	3000	1000	GSM5106117_GSE167494_cleaned_filtered
Neuron	Non-degenerative	60	GSE167494	GSM5106117	0	0	2.71381	369	0	369	Non-symptomatic		28169		7388	2.71083	1.16707		6.3252	8.03252	-0.0467765		40.4444	8.03252	0.0126965	single-nuclei	Brain	DLPFC	10X 3' v3	male	836.856	405.42	Control	-0.0710572	3000	1000	GSM5106117_GSE167494_cleaned_filtered
Oligodendrocyte	Non-degenerative	60	GSE167494	GSM5106117	1.08083	0	-0.857081	2128	23	2105	Non-symptomatic	4096	5592	2110	2645	2.50759	1.36544	1.22661	1.96105	3.43468	-0.00920163	-0.024735	7.12304	3.43468	-0.0163579	single-nuclei	Brain	DLPFC	10X 3' v3	male	354.014	160.048	Control	-0.786238	3000	1000	GSM5106117_GSE167494_cleaned_filtered
Astrocyte	AD	60	GSE183068	GSM5550496	1.25	0	-0.240159	560	7	553	AD	3430	6857	1785	2923	2.4329	1.7946	1.98858	4.02351	4.33273	0.0365315	0.03571	8.10488	4.33273	-0.0347368	single-nuclei	Brain	PFC	10X 3' v3	male	437.432	250.271	AD	-1.04907	3000	1000	GSM5550496_GSE183068_cleaned_filtered
Neuron	AD	60	GSE183068	GSM5550496	0.365408	0	0.708973	821	3	818	AD	3834	9162	1945	3418.5	2.69393	1.05975	1.28322	2.21883	5.59046	-0.0389768	-0.0216866	16.044	5.59046	-0.00474454	single-nuclei	Brain	PFC	10X 3' v3	male	565.77	165.648	AD	-0.130546	3000	1000	GSM5550496_GSE183068_cleaned_filtered
Oligodendrocyte	AD	60	GSE183068	GSM5550496	2.93542	0	-0.855457	511	15	496	AD	5522	6171.5	2508	2696	2.41936	1.40453	1.03352	2.31855	3.44355	-0.00406308	-0.00885997	7.05242	3.44355	-0.0411171	single-nuclei	Brain	PFC	10X 3' v3	male	354.234	171.976	AD	-1.09672	3000	1000	GSM5550496_GSE183068_cleaned_filtered
Astrocyte	ALS	59	GSE174332	191112_ALS_128_snRNA-A7	0.645161	0	-0.663461	310	2	308	ALS	3401	4663	1962	2373.5	2.64025	1.38317	1.6548	1.74026	1.47727	0.000908608	0.00356336	6.62662	3.74026	0.0122737	single-nuclei	Brain	Motor cortex	10X 3' v3	male	380.195	147.727	ALS	-0.319429	3000	1000	191112_ALS_128_snRNA-A7_GSE174332_cleaned_filtered
Neuron	ALS	59	GSE174332	191112_ALS_128_snRNA-A7	0	0	1.89473	1743	0	1743	ALS		16108		5066	2.88229	1.0334		3.20367	2.36718	0.00808396		28.4928	7.07745	0.0295777	single-nuclei	Brain	Motor cortex	10X 3' v3	male	726.104	236.718	ALS	0.532279	3000	1000	191112_ALS_128_snRNA-A7_GSE174332_cleaned_filtered
Oligodendrocyte	ALS	59	GSE174332	191112_ALS_128_snRNA-A7	1.20301	0	-0.80347	1330	16	1314	ALS	3576.5	4332	1858	2103.5	2.70243	1.52882	1.43961	1.92466	1.45814	0.0373278	0.0256915	6.70852	3.54338	0.0178793	single-nuclei	Brain	Motor cortex	10X 3' v3	male	361.263	145.814	ALS	-0.10062	3000	1000	191112_ALS_128_snRNA-A7_GSE174332_cleaned_filtered
OPC	ALS	59	GSE174332	191112_ALS_128_snRNA-A7	0	0	-0.056108	138	0	138	ALS		4802.5		2243.5	3.29552	1.15633		1.2971	1.17391	-0.00824113		13.1232	4.21014	0.0414032	single-nuclei	Brain	Motor cortex	10X 3' v3	male	462.319	117.391	ALS	1.98643	3000	1000	191112_ALS_128_snRNA-A7_GSE174332_cleaned_filtered
Astrocyte	Non-degenerative	59	GSE178265	pPDCN3839	1.07105	0	-0.0896977	2801	30	2771	Control	3908	7558	2221	3567	2.36446	2.138	2.07652	6.4511	3.76759	0.0433942	0.0264565	8.24432	4.43811	-0.00577408	single-nuclei	Brain	Caudate nucleus	10X 3' v3	male	457.777	376.759	Control	-1.28992	3000	1000	pPDCN3839_GSE178265_cleaned_filtered
Microglia	Non-degenerative	67	GSE152058	4494	0.581395	0	-0.469417	172	1	171	Control	3647	4318	1947	2160	2.90614	2.1977	0	4.15205	2.4386	0.0771988	-0.102716	8.18713	4.02339	0.109732	single-nuclei	Brain	Caudate Putamen	10X 3' v3	male	406.433	243.86	Control	0.616221	3000	1000	4494_GSE152058_cleaned_filtered
Neuron	Non-degenerative	59	GSE178265	pPDCN3839	0.0473597	0	1.71079	4223	2	4221	Control	8422	13499	3580	5255	2.80913	1.71573	0.903551	6.53352	4.39777	0.00387206	-0.0331436	22.1573	6.75669	0.0404138	single-nuclei	Brain	Caudate nucleus	10X 3' v3	male	701.232	439.777	Control	0.274853	3000	1000	pPDCN3839_GSE178265_cleaned_filtered
Oligodendrocyte	Non-degenerative	59	GSE178265	pPDCN3839	0.873362	0	0.338766	687	6	681	Control	3634	6790	2143.5	3371	3.0255	1.67905	1.38481	3.03377	2.46843	0.00799871	0.0133285	13.2217	5.00441	0.0533599	single-nuclei	Brain	Caudate nucleus	10X 3' v3	male	515.712	246.843	Control	1.03625	3000	1000	pPDCN3839_GSE178265_cleaned_filtered
Neuron	Non-degenerative	59	GSE140231	C3	0.0959693	0	0.200897	2084	2	2082	Normal	3456.5	5032	2148.5	2715.5	2.9611	1.7343	1.81352	2.78338	4.90778	-0.00808376	0.0140689	10.8631	4.90778	0.13106	single-nuclei	Brain	Cortex Substantia nigra	10X 3' v2	male	497.07	214.025	Control	0.809621	3000	1000	C3_GSE140231_cleaned_filtered
Astrocyte	HD	58	GSE152058	2903	2.20126	0	-1.06869	318	7	311	HD	3403	4352	1886	2234	2.44579	2.20491	2.5576	4.1672	2.33119	0.0734091	0.123923	5.49196	3.18006	0.0400032	single-nuclei	Brain	Caudate Putamen	10X 3' v3	male	325.402	233.119	HD	-1.00374	3000	1000	2903_GSE152058_cleaned_filtered
Neuron	HD	58	GSE152058	2903	0	0	0.832049	199	0	199	HD		11117		3935	2.79257	1.46308		4.38693	2.47236	-0.0180604		18.6181	5.34673	0.109999	single-nuclei	Brain	Caudate Putamen	10X 3' v3	male	582.412	247.236	HD	0.216583	3000	1000	2903_GSE152058_cleaned_filtered
Oligodendrocyte	HD	58	GSE152058	2903	3.62473	0	-1.42589	938	34	904	HD	3387	4112	1780.5	2019.5	2.35652	1.38671	1.38943	1.85509	1.42367	0.014236	0.0148637	4.89934	2.66372	0.0254507	single-nuclei	Brain	Caudate Putamen	10X 3' v3	male	277.102	142.367	HD	-1.31787	3000	1000	2903_GSE152058_cleaned_filtered
OPC	HD	58	GSE152058	2903	0.591716	0	-0.543404	169	1	168	HD	4899	5004.5	2399	2331	2.87852	1.61314	0	2.45833	1.74405	0.0177705	-0.106706	9.55357	3.66667	0.103419	single-nuclei	Brain	Caudate Putamen	10X 3' v3	male	396.429	174.405	HD	0.519023	3000	1000	2903_GSE152058_cleaned_filtered
Astrocyte	MS	57	GSE179590	S10	0.917431	0	-0.407427	327	3	324	MS	4024	6408	1881	2892	2.47902	1.84006	1.96316	3.88272	4.12346	0.0400292	0.100714	7.8179	4.12346	0.0746136	single-nuclei	Brain	DLPFC	10X 3' v3	male	414.815	249.691	MS	-0.886786	3000	1000	S10_GSE179590_cleaned_filtered
Microglia	Other dementias	67	GSE173731	4494	1.63934	0	-0.532398	244	4	240	Dementia	4386.5	4233.5	2308	2230	2.84284	1.98845	1.62008	3.325	3.9625	0.0608442	0.0414284	7.92083	3.9625	0.0755641	single-nuclei	Brain	Caudate Putamen	10X 3' v3	male	397.917	218.75	Dementia	0.393473	3000	1000	4494_GSE173731_cleaned_filtered
Oligodendrocyte	MS	57	GSE179590	S10	1.21141	0	-0.980091	2559	31	2528	MS	4156	5170.5	2179	2452	2.58194	1.35247	1.39111	1.8754	3.31487	0.0158665	-0.00207851	6.99763	3.31487	0.0760228	single-nuclei	Brain	DLPFC	10X 3' v3	male	337.381	154.589	MS	-0.524611	3000	1000	S10_GSE179590_cleaned_filtered
OPC	MS	57	GSE179590	S10	0.384615	0	0.248264	260	1	259	MS	5594	6128	2800	2959	2.92143	1.53536	1.52066	2.69498	4.93822	0.00493981	-0.0279786	12.1853	4.93822	0.155208	single-nuclei	Brain	DLPFC	10X 3' v3	male	503.475	206.564	MS	0.670026	3000	1000	S10_GSE179590_cleaned_filtered
Astrocyte	HD	56	GSE152058	2665	0.873362	0	0.0906181	458	4	454	HD	3325	7975	1618	2883	2.58891	1.67615	0.730361	4.0815	2.37004	0.0285646	-0.0185691	10.8326	4.74449	0.0845635	single-nuclei	Brain	Putamen Caudate	10X 3' v3	male	482.159	237.004	HD	-0.500094	3000	1000	2665_GSE152058_cleaned_filtered
Oligodendrocyte	HD	56	GSE152058	2665	3.78988	0	-1.14149	4169	158	4011	HD	3644.5	5054	1669.5	2071	2.44559	1.14465	0.514148	1.52356	1.18798	-0.00719322	-0.00821657	6.8898	3.04488	0.0465166	single-nuclei	Brain	Putamen Caudate	10X 3' v3	male	315.557	118.798	HD	-1.00441	3000	1000	2665_GSE152058_cleaned_filtered
Astrocyte	AD	56	GSE167494	GSM5106110	0.48878	0	-0.0047999	4501	22	4479	AD	4541.5	8780	2323.5	3631	2.40401	1.7357	1.95026	4.35276	4.58272	0.0276774	0.0476136	9.39607	4.58272	0.0757747	single-nuclei	Brain	DLPFC	10X 3' v3	male	469.257	305.135	AD	-1.15075	3000	1000	GSM5106110_GSE167494_cleaned_filtered
Oligodendrocyte	AD	56	GSE167494	GSM5106110	1.99667	0	-1.07197	601	12	589	AD	4223.5	5916	2298.5	2642	2.3287	1.39475	1.06647	2.12903	3.18336	-0.00711117	-0.0328494	6.45501	3.18336	0.0589607	single-nuclei	Brain	DLPFC	10X 3' v3	male	324.958	169.1	AD	-1.41575	3000	1000	GSM5106110_GSE167494_cleaned_filtered
Astrocyte	HD	56	GSE173731	2665	0.992063	0	0.0454572	1008	10	998	HD	4780.5	6896.5	1987	2721.5	2.64824	1.58803	1.01642	3.37776	4.71844	0.0308199	-0.00504793	11.5371	4.71844	0.0515832	single-nuclei	Brain	Caudate Putamen	10X 3' v3	male	476.052	208.116	HD	-0.291302	3000	1000	2665_GSE173731_cleaned_filtered
Oligodendrocyte	HD	56	GSE173731	2665	3.46464	0	-1.24055	2107	73	2034	HD	3873	4842.5	1850	2111	2.39121	1.16009	1.22287	1.38643	2.98181	-0.00411601	-0.00665312	6.18191	2.98181	-0.0503982	single-nuclei	Brain	Caudate Putamen	10X 3' v3	male	302.163	112.684	HD	-1.19581	3000	1000	2665_GSE173731_cleaned_filtered
Neuron	Non-degenerative	55	GSE144136	22_Control	0.524246	0	-0.499452	763	4	759		3220.5	4468	1965	2512	2.63632	1.36168	0.618547	1.60211	1.46377	-0.00723539	-0.0417742	6.57181	4.02372	-0.0215886	single-nuclei	Brain	DLPFC	10X 3' v2	male	402.372	146.377	Control	-0.333253	3000	1000	22_Control_GSE144136_cleaned_filtered
Neuron	Non-degenerative	55	GSE140231	C2	0.435594	0	0.125036	1607	7	1600	Normal	5293	6240.5	2923	3171	2.61861	1.78623	2.05368	3.55875	4.79063	0.000967317	0.0163699	8.88438	4.79063	0.0619072	single-nuclei	Brain	Cortex Substantia nigra	10X 3' v2	male	486.812	247	Control	-0.395598	3000	1000	C2_GSE140231_cleaned_filtered
Astrocyte	Non-degenerative	54	GSE174332	191114_PN_301_snRNA-E7	0.982318	0	-0.628511	509	5	504	Control	3442	5027.5	1808	2321.5	2.62312	1.43612	1.946	1.85119	1.52183	0.00886006	0.014077	6.9623	3.81151	0.0153514	single-nuclei	Brain	Motor cortex	10X 3' v3	male	384.921	152.183	Control	-0.379711	3000	1000	191114_PN_301_snRNA-E7_GSE174332_cleaned_filtered
Neuron	Non-degenerative	54	GSE174332	191114_PN_301_snRNA-E7	0	0	1.79474	1502	0	1502	Control		18049		5675.5	2.80939	1.18283		4.4241	3.0233	0.0152729		28.6625	6.9281	0.0228007	single-nuclei	Brain	Motor cortex	10X 3' v3	male	712.583	302.33	Control	0.275778	3000	1000	191114_PN_301_snRNA-E7_GSE174332_cleaned_filtered
Oligodendrocyte	Non-degenerative	54	GSE174332	191114_PN_301_snRNA-E7	1.85273	0	-1.03568	2105	39	2066	Control	3589	4071	1823	2012	2.58755	1.18966	1.28719	1.10745	0.984511	0.00774272	0.0057691	5.71491	3.25121	0.0137143	single-nuclei	Brain	Motor cortex	10X 3' v3	male	329.864	98.4511	Control	-0.504895	3000	1000	191114_PN_301_snRNA-E7_GSE174332_cleaned_filtered
OPC	Non-degenerative	54	GSE174332	191114_PN_301_snRNA-E7	1.0101	0	-0.158533	198	2	196	Control	5493	4817.5	2372.5	2307.5	3.16756	1.12552	0.997205	1.26531	1.05102	-0.0126623	-0.00805807	11.4184	4.02551	0.0383413	single-nuclei	Brain	Motor cortex	10X 3' v3	male	448.469	105.102	Control	1.53614	3000	1000	191114_PN_301_snRNA-E7_GSE174332_cleaned_filtered
Neuron	Non-degenerative	54	GSE144136	31_Control	0.893744	0	-0.316911	1007	9	998		3706	4720	2117	2509	2.73683	1.33845	1.2397	1.62325	1.41683	-0.00934515	-0.0271595	7.5521	4.26653	-0.00596242	single-nuclei	Brain	DLPFC	10X 3' v2	male	427.054	141.683	Control	0.0204348	3000	1000	31_Control_GSE144136_cleaned_filtered
Neuron	Non-degenerative	54	GSE152058	A58R	0	0	0.999268	219	0	219	Control		8500		3820	2.8703	1.40755		2.96804	2.25114	-0.0313089		14.5799	5.7032	0.117811	single-nuclei	Brain	Caudate Putamen	10X 3' v3	male	605.023	225.114	Control	0.490118	3000	1000	A58R_GSE152058_cleaned_filtered
Oligodendrocyte	Non-degenerative	54	GSE152058	A58R	3.92157	0	-1.30183	153	6	147	Control	3511.5	3542	1913	1939	2.36352	1.32934	1.69928	1.20408	1.06803	-0.00528375	0.0347902	3.93197	2.69388	0.0473845	single-nuclei	Brain	Caudate Putamen	10X 3' v3	male	293.878	106.803	Control	-1.29321	3000	1000	A58R_GSE152058_cleaned_filtered
Neuron	Non-degenerative	53	GSE144136	28_Suicide	0.559441	0	-0.441059	715	4	711		4180	4264	2410	2351	2.78003	1.5229	2.00116	1.98031	1.61744	0.0133384	0.0432595	7.20253	4.09705	-0.00301687	single-nuclei	Brain	DLPFC	10X 3' v2	male	410.267	161.744	Control	0.172432	3000	1000	28_Suicide_GSE144136_cleaned_filtered
Astrocyte	HD	53	GSE152058	4254	2.23464	0	-1.18893	179	4	175	HD	3790.5	4170	1975.5	2174	2.45163	2.11025	1.4384	3.67429	2.34286	0.0719065	0.0141704	5.34857	3.02857	0.0385551	single-nuclei	Brain	Caudate Putamen	10X 3' v3	male	309.143	234.286	HD	-0.98317	3000	1000	4254_GSE152058_cleaned_filtered
Neuron	HD	53	GSE152058	4254	0	0	0.12285	178	0	178	HD		6947		2996.5	2.70706	1.21096		2.42697	1.66854	-0.029756		13.0899	4.52809	0.0877652	single-nuclei	Brain	Caudate Putamen	10X 3' v3	male	486.517	166.854	HD	-0.0843341	3000	1000	4254_GSE152058_cleaned_filtered
Astrocyte	ALS	52	GSE174332	191112_ALS_116_snRNA-C2	0.552486	0	-0.422492	362	2	360	ALS	3879	5795	1988	2638	2.549	1.35878	1.28373	1.83056	1.52222	-0.00401629	-0.0165845	7.08333	4.06111	0.0119089	single-nuclei	Brain	Motor cortex	10X 3' v3	male	412.778	152.222	ALS	-0.640529	3000	1000	191112_ALS_116_snRNA-C2_GSE174332_cleaned_filtered
Neuron	ALS	52	GSE174332	191112_ALS_116_snRNA-C2	0.0682128	0	1.93844	1466	1	1465	ALS	3003	17417	1731	5065	2.96464	0.850332	1.46557	2.54744	1.94403	-0.00405959	0.0339482	32.17	7.13174	0.0337147	single-nuclei	Brain	Motor cortex	10X 3' v3	male	732.014	194.403	ALS	0.822072	3000	1000	191112_ALS_116_snRNA-C2_GSE174332_cleaned_filtered
Oligodendrocyte	ALS	52	GSE174332	191112_ALS_116_snRNA-C2	1.41753	0	-1.073	5432	77	5355	ALS	3530	4340	1847	2140	2.58868	1.01983	1.20802	0.889823	0.796078	-0.0103473	-0.00330884	5.90607	3.17031	0.0109282	single-nuclei	Brain	Motor cortex	10X 3' v3	male	324.818	79.6078	ALS	-0.50089	3000	1000	191112_ALS_116_snRNA-C2_GSE174332_cleaned_filtered
OPC	ALS	52	GSE174332	191112_ALS_116_snRNA-C2	0.265957	0	0.163401	376	1	375	ALS	6441	5632	2488	2538	3.18052	1.0268	0	1.15733	0.992	-0.0249461	-0.0746342	13.2027	4.49067	0.0387104	single-nuclei	Brain	Motor cortex	10X 3' v3	male	492	99.2	ALS	1.58174	3000	1000	191112_ALS_116_snRNA-C2_GSE174332_cleaned_filtered
Neuron	Non-degenerative	52	GSE144136	13_Control	1.35501	0	-0.752674	738	10	728		3558	4679	2297.5	2767	2.43948	1.50133	1.10839	2.06044	1.66209	-0.00601433	-0.0212945	5.54396	3.67857	-0.0470536	single-nuclei	Brain	DLPFC	10X 3' v2	male	368.132	166.209	Control	-1.02592	3000	1000	13_Control_GSE144136_cleaned_filtered
Astrocyte	MS	52	GSE179590	S2	0.938967	0	-0.483693	426	4	422	MS	5379.5	5547	2535.5	2562.5	2.51605	1.45718	0.889398	2.21327	3.99052	-0.00279746	-0.0652532	6.81754	3.99052	0.0843491	single-nuclei	Brain	DLPFC	10X 3' v3	male	404.502	173.46	MS	-0.756469	3000	1000	S2_GSE179590_cleaned_filtered
Oligodendrocyte	MS	52	GSE179590	S2	2.28509	0	-1.28537	1838	42	1796	MS	3776.5	4515.5	1874	2108.5	2.44805	1.20213	1.3131	1.2951	2.88641	0.00640485	0.0165173	5.29844	2.88641	0.0662986	single-nuclei	Brain	DLPFC	10X 3' v3	male	296.102	114.031	MS	-0.995764	3000	1000	S2_GSE179590_cleaned_filtered
OPC	MS	52	GSE179590	S2	0.446429	0	0.391702	224	1	223	MS	8172	6318	3176	2900	3.32388	1.45327	0	2.39013	5.14798	-0.003404	-0.119253	18.1749	5.14798	0.218095	single-nuclei	Brain	DLPFC	10X 3' v3	male	522.87	193.274	MS	2.08621	3000	1000	S2_GSE179590_cleaned_filtered
Neuron	Non-degenerative	51	GSE144136	4_Suicide	0.738916	0	-0.324303	1218	9	1209		3420	4677	2139	2784	2.65487	1.56409	1.92395	2.12821	1.81224	-0.00123383	-0.00991092	6.82878	4.2531	-0.0208341	single-nuclei	Brain	DLPFC	10X 3' v2	male	426.055	181.224	Control	-0.267984	3000	1000	4_Suicide_GSE144136_cleaned_filtered
Neuron	Non-degenerative	51	GSE186538	HSB237	0.195098	0	0.452067	8201	16	8185	Control	3636	9079	2016.5	3792	2.7161	1.16732	1.3179	2.47709	5.18241	-0.0265541	-0.0127926	14.6381	5.18241	-0.013796	single-nuclei	Brain	Dentate gyrus Hippocampus Subiculum Entorhinal cortex	10X 3' v3	male	531.032	188.21	Control	-0.0525223	3000	1000	HSB237_GSE186538_cleaned_filtered
Oligodendrocyte	Non-degenerative	51	GSE186538	HSB237	4.77816	0	-1.48981	293	14	279	Control	3292	3374	1723.5	1785	2.43579	1.34487	1.31536	0.989247	2.64158	-0.00559234	0.00484346	4.26165	2.64158	-0.0243285	single-nuclei	Brain	Dentate gyrus Hippocampus Subiculum Entorhinal cortex	10X 3' v3	male	268.459	89.9642	Control	-1.03892	3000	1000	HSB237_GSE186538_cleaned_filtered
OPC	Non-degenerative	51	GSE186538	HSB237	0.884956	0	-0.816775	565	5	560	Control	3093	3405.5	1550	1847.5	3.01103	1.34403	0	1.075	3.54643	-0.00370647	-0.0467103	7.3	3.54643	0.00140556	single-nuclei	Brain	Dentate gyrus Hippocampus Subiculum Entorhinal cortex	10X 3' v3	male	359.464	96.25	Control	0.985314	3000	1000	HSB237_GSE186538_cleaned_filtered
Microglia	PD	66	GSE157783	IPD2	2.43243	0	-0.748486	370	9	361	IPD	4519	4215	2252	2091	2.86959	2.27168	1.60402	4.09418	2.5928	0.080906	0.00480874	7.71745	3.67867	0.0780579	single-nuclei	Brain	Midbrain	10X 3' v3	male	368.698	259.28	PD	0.487587	3000	1000	IPD2_GSE157783_cleaned_filtered
Neuron	Non-degenerative	49	GSE178265	pPDsHSrSNxi6173	0.356665	0	0.46015	2243	8	2235		4863	9961	2508.5	4406	2.2281	1.66538	1.41876	5.2689	3.14452	-0.0171718	-0.024426	10.2237	5.1821	-0.0180704	single-nuclei	Brain	Substantia nigra pars compacta	10X 3' v3	male	532.125	314.452	Control	-1.76975	3000	1000	pPDsHSrSNxi6173_GSE178265_cleaned_filtered
Oligodendrocyte	Non-degenerative	49	GSE178265	pPDsHSrSNxi6173	0.154799	0	0.838289	646	1	645		11982	8770	4835	4076	2.89948	1.69539	1.25384	4.13643	3.1907	0.00753301	-0.0357497	16.2744	5.61705	0.0372832	single-nuclei	Brain	Substantia nigra pars compacta	10X 3' v3	male	583.256	319.07	Control	0.5928	3000	1000	pPDsHSrSNxi6173_GSE178265_cleaned_filtered
OPC	Non-degenerative	49	GSE178265	pPDsHSrSNxi6173	0.152672	0	0.844516	655	1	654		11982	8770	4835	4067	2.89951	1.6942	1.25384	4.15291	3.20183	0.00780578	-0.0357497	16.3104	5.62538	0.0375134	single-nuclei	Brain	Substantia nigra pars compacta	10X 3' v3	male	584.098	320.183	Control	0.592893	3000	1000	pPDsHSrSNxi6173_GSE178265_cleaned_filtered
Neuron	Non-degenerative	48	GSE144136	19_Control	0.797267	0	-0.562842	878	7	871		3345	4295	2163	2575	2.60883	1.56449	1.38412	2.09989	1.8163	0.00856383	-0.023205	6.17681	3.93571	-0.0265806	single-nuclei	Brain	DLPFC	10X 3' v2	male	393.8	181.63	Control	-0.43	3000	1000	19_Control_GSE144136_cleaned_filtered
Astrocyte	Non-degenerative	48	GSE186538	HSB179	0.609756	0	-0.813418	492	3	489	Control	3119	3776	1735	1971	2.72216	1.75779	2.00314	1.9407	3.5501	0.0295581	0.0299788	5.93661	3.5501	-0.00356123	single-nuclei	Brain	Dentate gyrus	10X 3' v3	male	359.918	164.622	Control	-0.0311837	3000	1000	HSB179_GSE186538_cleaned_filtered
Astrocyte	Non-degenerative	48	GSE186538	HSB282	1.80723	0	-0.796026	332	6	326	Control	4437.5	3939	2099	2004.5	2.63275	1.3619	0	1.5	3.57669	0.00064476	-0.0484239	6.00613	3.57669	-0.00855192	single-nuclei	Brain	Dentate gyrus	10X 3' v3	male	362.27	122.393	Control	-0.345836	3000	1000	HSB282_GSE186538_cleaned_filtered
Microglia	AD	65	GSE183068	GSM5550454	1.42857	0	-0.597377	140	2	138	AD/CAA	4068	4519	2021	2205	2.90234	2.36056	1.21038	4.97826	3.84783	0.104343	0.0320772	9.04348	3.84783	0.0150853	single-nuclei	Brain	PFC	10X 3' v3	male	389.13	292.029	AD	0.602833	3000	1000	GSM5550454_GSE183068_cleaned_filtered
Neuron	Non-degenerative	48	GSE186538	HSB179	0.0237699	0	0.552517	8414	2	8412	Control	6161	5938	2423.5	2718	3.01935	1.12767	0	2.03436	5.21862	-0.0192477	-0.0676657	17.9503	5.21862	0.00243631	single-nuclei	Brain	Dentate gyrus	10X 3' v3	male	544.615	161.163	Control	1.01459	3000	1000	HSB179_GSE186538_cleaned_filtered
Neuron	Non-degenerative	48	GSE186538	HSB282	0.119832	0	-0.0600365	1669	2	1667	Control	3106.5	5503	1415	2384	2.91188	1.01431	0.707824	1.58488	4.41932	-0.0130773	-0.0170847	13.8356	4.41932	-0.00318077	single-nuclei	Brain	Dentate gyrus	10X 3' v3	male	461.788	123.515	Control	0.636411	3000	1000	HSB282_GSE186538_cleaned_filtered
Oligodendrocyte	Non-degenerative	48	GSE186538	HSB179	1.47965	0	-1.19422	2433	36	2397	Control	3290.5	3480	1698	1777	2.69877	1.34613	1.29016	1.15811	3.0413	0.00591015	-0.0081426	5.38256	3.0413	-0.015239	single-nuclei	Brain	Dentate gyrus	10X 3' v3	male	308.427	101.71	Control	-0.113516	3000	1000	HSB179_GSE186538_cleaned_filtered
Oligodendrocyte	Non-degenerative	48	GSE186538	HSB282	1.91952	0	-1.25579	5939	114	5825	Control	3460.5	3855	1835.5	1972	2.50412	1.18578	1.31853	1.02558	2.93991	-0.0149064	-0.0134523	5.00979	2.93991	-0.0244653	single-nuclei	Brain	Dentate gyrus	10X 3' v3	male	300.103	92.8069	Control	-0.798462	3000	1000	HSB282_GSE186538_cleaned_filtered
OPC	Non-degenerative	48	GSE186538	HSB179	0.504032	0	-0.167818	992	5	987	Control	3622	3806	1859	2008	3.33744	1.30946	1.31461	1.21884	4.3617	-0.00489384	0.0192593	11.2067	4.3617	0.0169601	single-nuclei	Brain	Dentate gyrus	10X 3' v3	male	447.214	106.89	Control	2.13395	3000	1000	HSB179_GSE186538_cleaned_filtered
OPC	Non-degenerative	48	GSE186538	HSB282	0.123052	0	-0.103629	2438	3	2435	Control	4697	4453	2107	2147	3.27333	1.1464	0	1.15318	4.49405	-0.0130743	-0.0774907	12.6103	4.49405	0.0128265	single-nuclei	Brain	Dentate gyrus	10X 3' v3	male	455.893	99.7536	Control	1.90834	3000	1000	HSB282_GSE186538_cleaned_filtered
Microglia	AD	65	GSE183068	GSM5550455	0.689655	0	-0.578621	145	1	144	AD/CAA	3020	4247.5	1760	2130	2.91302	2.2837	1.46123	4.22222	3.88194	0.0993627	-0.0195829	7.98611	3.88194	0.0210784	single-nuclei	Brain	PFC	10X 3' v3	male	391.667	265.278	AD	0.640419	3000	1000	GSM5550455_GSE183068_cleaned_filtered
Neuron	Non-degenerative	47	GSE144136	10_Suicide	0.934579	0	-0.0523263	1070	10	1060		3699.5	5390	2188	2837.5	2.68219	1.45554	1.28691	2.14906	1.81509	-0.00264635	-0.0342056	8.18585	4.62547	-0.00810574	single-nuclei	Brain	DLPFC	10X 3' v2	male	462.83	181.509	Control	-0.171832	3000	1000	10_Suicide_GSE144136_cleaned_filtered
Astrocyte	Non-degenerative	47	GSE178265	pPDCN4340	0.982385	0	-0.082568	2952	29	2923	Control	5314	7477	2777	3551	2.33501	1.75383	1.62345	3.84844	2.86658	0.00461213	-0.00960269	7.50359	4.43141	-0.00883135	single-nuclei	Brain	Caudate nucleus	10X 3' v3	male	458.741	286.658	Control	-1.39354	3000	1000	pPDCN4340_GSE178265_cleaned_filtered
Neuron	Non-degenerative	47	GSE178265	pPDCN4340	0.0435825	0	2.53346	4589	2	4587	Control	3078.5	21407	1793.5	6209	2.75486	1.52129	1.17768	7.61958	4.74384	-0.00627904	-0.00809233	31.4519	7.80532	0.0411032	single-nuclei	Brain	Caudate nucleus	10X 3' v3	male	812.47	474.384	Control	0.0838805	3000	1000	pPDCN4340_GSE178265_cleaned_filtered
Pericyte	Non-degenerative	47	GSE178265	pPDCN4340	2.97619	0	-1.10682	168	5	163	Control	3864	4343	2204	2489	2.26417	2.22202	1.86817	4.02454	2.4908	0.0314534	0.0256955	4.27607	3.13497	-0.00933428	single-nuclei	Brain	Caudate nucleus	10X 3' v3	male	320.245	249.08	Control	-1.64282	3000	1000	pPDCN4340_GSE178265_cleaned_filtered
Microglia	AD	64	GSE183068	GSM5550488	1.62602	0	-0.635157	369	6	363	AD	3471	3821	1771.5	1942	2.974	2.18991	2.26855	3.52893	3.80165	0.0813625	0.072982	7.57025	3.80165	0.0334468	single-nuclei	Brain	PFC	10X 3' v3	male	384.022	229.201	AD	0.855025	3000	1000	GSM5550488_GSE183068_cleaned_filtered
Neuron	Non-degenerative	44	GSE144136	23_Suicide	1.0118	0	-0.658099	593	6	587		3400	3905	2170	2416	2.68878	1.44839	1.30483	1.74106	1.49404	0.000276147	-0.0344059	6.00852	3.80409	-0.019059	single-nuclei	Brain	DLPFC	10X 3' v2	male	380.92	149.404	Control	-0.148671	3000	1000	23_Suicide_GSE144136_cleaned_filtered
Neuron	Non-degenerative	44	GSE160189	A67	0.851064	0	-1.23433	470	4	466	Control	3949	4718	2011.5	2253.5	2.59704	0	0	0.00429185	0.00429185	-0.000828462	-0.000888247	6.84764	3.02361	0.00902847	single-nuclei	Brain	Anterior hippocampus	10X 3' v2	male	303.004	0.429185	Control	-0.471488	3000	1000	A67_GSE160189_cleaned_filtered
Astrocyte	Non-degenerative	44	GSE186538	HSB181	1.09034	0	-0.664902	1284	14	1270	Control	3387	4398	1826.5	2140	2.63979	1.35738	1.3949	1.63543	3.72992	0.00119796	-0.00292385	6.4622	3.72992	-0.00757761	single-nuclei	Brain	Dentate gyrus	10X 3' v3	male	380	135.433	Control	-0.321054	3000	1000	HSB181_GSE186538_cleaned_filtered
Neuron	Non-degenerative	44	GSE186538	HSB181	0.22358	0	0.826562	6709	15	6694	Control	4248	10650	1789	3582	3.00511	0.842545	1.01577	1.74574	5.6225	-0.0302821	-0.0225366	22.0964	5.6225	0.000505327	single-nuclei	Brain	Dentate gyrus	10X 3' v3	male	581.67	137.257	Control	0.964498	3000	1000	HSB181_GSE186538_cleaned_filtered
Oligodendrocyte	Non-degenerative	44	GSE186538	HSB181	2.02511	0	-1.25869	2469	50	2419	Control	3564.5	3911	1834.5	1935	2.48843	1.17007	0	0.982224	2.94212	-0.0152453	-0.0252374	5.08392	2.94212	-0.0237753	single-nuclei	Brain	Dentate gyrus	10X 3' v3	male	299.711	88.4663	Control	-0.853664	3000	1000	HSB181_GSE186538_cleaned_filtered
OPC	Non-degenerative	44	GSE186538	HSB181	0.236967	0	-0.0216112	1266	3	1263	Control	3709	4676	1857	2269	3.20695	1.08067	1.22763	1.06572	4.57641	-0.0206919	-0.0284623	12.293	4.57641	0.0114222	single-nuclei	Brain	Dentate gyrus	10X 3' v3	male	466.983	95.4869	Control	1.67476	3000	1000	HSB181_GSE186538_cleaned_filtered
Neuron	Non-degenerative	43	GSE144136	21_Control	0.235294	0	0.213844	850	2	848		3451	6295.5	2193.5	3159	2.7785	1.45018	1.81712	2.28184	1.85377	-0.00544499	0.006682	9.78774	4.98467	0.00280452	single-nuclei	Brain	DLPFC	10X 3' v2	male	498.821	185.377	Control	0.167069	3000	1000	21_Control_GSE144136_cleaned_filtered
Microglia	Non-degenerative	59	GSE178265	pPDCN3839	0.218579	0	0.0962009	915	2	913	Control	4613	6212	2556.5	3181	2.70768	2.39563	2.31052	6.53012	3.7667	0.0673072	0.0221463	9.07667	4.70975	0.0333863	single-nuclei	Brain	Caudate nucleus	10X 3' v3	male	482.913	376.67	Control	-0.0821604	3000	1000	pPDCN3839_GSE178265_cleaned_filtered
Neuron	MS	43	GSE179590	S1	0	0	0.312418	107	0	107	MS		6793		2896	2.67124	1.41329		3.24299	5.01869	0.00112406		14.4579	5.01869	0.118282	single-nuclei	Brain	DLPFC	10X 3' v3	male	512.15	221.495	MS	-0.21038	3000	1000	S1_GSE179590_cleaned_filtered
Oligodendrocyte	MS	43	GSE179590	S1	1.35593	0	-0.862394	3245	44	3201	MS	5032.5	6860	2213	2710	2.3502	1.44665	1.37894	2.59481	3.42862	0.0307811	0.0333606	7.3627	3.42862	0.0527966	single-nuclei	Brain	DLPFC	10X 3' v3	male	353.296	199.75	MS	-1.3401	3000	1000	S1_GSE179590_cleaned_filtered
Neuron	Non-degenerative	42	GSE144136	7_Control	1.10935	0	-0.706621	631	7	624		3293	4028.5	1999	2320	2.6209	1.47637	1.39544	1.86699	1.59455	0.00997553	0.00307867	5.86699	3.73718	-0.0246705	single-nuclei	Brain	DLPFC	10X 3' v2	male	374.359	159.455	Control	-0.387512	3000	1000	7_Control_GSE144136_cleaned_filtered
Neuron	Non-degenerative	41	GSE144136	15_Control	0.887372	0	-0.258757	1465	13	1452		3612	5079.5	2189	2821.5	2.62332	1.32908	1.45139	1.66047	1.42562	-0.0213605	-0.0182219	7.17218	4.34573	-0.0171976	single-nuclei	Brain	DLPFC	10X 3' v2	male	434.917	142.562	Control	-0.379006	3000	1000	15_Control_GSE144136_cleaned_filtered
Microglia	MS	57	GSE179590	S10	0.411523	0	-0.886769	243	1	242	MS	3754	4050.5	1970	2034	2.62628	2.03979	2.19628	3.05785	3.45455	0.0651672	0.0639859	6.09917	3.45455	0.115185	single-nuclei	Brain	DLPFC	10X 3' v3	male	350	215.289	MS	-0.368606	3000	1000	S10_GSE179590_cleaned_filtered
Neuron	Non-degenerative	34	GSE144136	18_Suicide	0.227273	0	-0.267664	440	1	439		3661	4399	2155	2538	2.76075	1.58596	0	2	1.73121	0.00606718	-0.0817671	7.23007	4.33713	-0.00280452	single-nuclei	Brain	DLPFC	10X 3' v2	male	433.713	173.121	Control	0.104597	3000	1000	18_Suicide_GSE144136_cleaned_filtered
Neuron	Non-degenerative	32	GSE144136	26_Suicide	0.389864	0	-0.470678	513	2	511		3232	4296	1865.5	2423	2.71352	1.39796	1.69131	1.75538	1.55186	0.00129054	0.0265663	6.86888	4.05675	-0.0105147	single-nuclei	Brain	DLPFC	10X 3' v2	male	406.262	155.186	Control	-0.0615917	3000	1000	26_Suicide_GSE144136_cleaned_filtered
CAM	Non-degenerative	31	syn25879216	30232	0	0	0.606386	158	0	158	Cancer		13780.5		3692.5	2.53924	2.7889		23.6139	5.43671	0.0288668		17.8861	5.43671	0.0840221	single-cell	Brain	Frontal lobe	10X 3' v2	male	551.899	577.215	Cancer	-0.674874	3000	1000	30232_syn25879216_cleaned_filtered
Microglia	Non-degenerative	49	GSE178265	pPDsHSrSNxi6173	1.5411	0	-0.540142	584	9	575		4651	5225	2324	2694	2.58267	2.60746	2.0843	7.11826	3.4887	0.0924912	0.0255317	7.24522	3.89217	0.0154017	single-nuclei	Brain	Substantia nigra pars compacta	10X 3' v3	male	396.87	348.87	Control	-0.522054	3000	1000	pPDsHSrSNxi6173_GSE178265_cleaned_filtered
Neuron	Non-degenerative	30	GSE144136	14_Suicide	1.06257	0	-0.180749	847	9	838		4375	4902.5	2496	2800	2.71122	1.6247	1.35183	2.34248	2.04654	0.00844252	-0.012273	7.63842	4.4463	-0.0091648	single-nuclei	Brain	DLPFC	10X 3' v2	male	445.465	204.654	Control	-0.0697029	3000	1000	14_Suicide_GSE144136_cleaned_filtered
Neuron	Non-degenerative	29	GSE144136	34_Suicide	0.697837	0	-0.361596	1433	10	1423		3387.5	4641	2083.5	2607	2.68361	1.29282	1.38142	1.50387	1.36472	-0.0160414	-0.0270793	7.23963	4.20098	-0.0178017	single-nuclei	Brain	DLPFC	10X 3' v2	male	421.012	136.472	Control	-0.166833	3000	1000	34_Suicide_GSE144136_cleaned_filtered
Microglia	Non-degenerative	48	GSE186538	HSB179	1.34228	0	-0.859099	149	2	147	Control	3215.5	3328	1747.5	1872	2.81189	2.38102	2.28706	3.48299	3.4966	0.0905465	0.0659416	5.61224	3.4966	-0.00292052	single-nuclei	Brain	Dentate gyrus	10X 3' v3	male	353.741	212.925	Control	0.284549	3000	1000	HSB179_GSE186538_cleaned_filtered
Neuron	Non-degenerative	27	GSE144136	29_Control	1.26812	0	-0.573984	552	7	545		3217	4420	2042	2663	2.61025	1.43655	1.96211	1.84771	1.58165	-0.00703459	0.0126621	6.27156	3.90826	-0.0293189	single-nuclei	Brain	DLPFC	10X 3' v2	male	392.294	158.165	Control	-0.425015	3000	1000	29_Control_GSE144136_cleaned_filtered
CAM	Non-degenerative	27	syn25879216	21476	4.73684	0	-1.43224	190	9	181	Epilepsy	3917	5287	1664	2020	2.07331	2.97005	2.62212	11.4475	2.72376	0.0816413	0.0589952	4.26519	2.72376	0.0416808	single-cell	Brain	Anterior temporal cortex Mesiotemporal lobe	10X 3' v2	male	276.243	377.348	Epilepsy	-2.31447	3000	1000	21476_syn25879216_cleaned_filtered
Microglia	Non-degenerative	45	GSE137444	RM65	1.93523	0	-1.01618	2532	49	2483	Control epilepsy	3534	3919	1945	2045	2.44584	3.05838	3.10296	8.96134	3.85904	0.0470902	0.0607539	4.81313	3.29964	0.185476	single-cell	Brain	Temporal cortex	10X 3' v2	male	332.501	385.904	Control	-1.00357	3000	1000	RM65_GSE137444_cleaned_filtered
Neuron	Non-degenerative	26	GSE144136	30_Suicide	1.417	0	-0.339315	988	14	974		3730.5	5143.5	2161	2870.5	2.60762	1.43612	1.29172	1.9538	1.6232	-0.0108515	-0.0289771	7.07392	4.23717	-0.0252211	single-nuclei	Brain	DLPFC	10X 3' v2	male	424.025	162.32	Control	-0.434245	3000	1000	30_Suicide_GSE144136_cleaned_filtered
Astrocyte	Non-degenerative	25	GSE178265	pPDCN5730	1.51515	0	-0.612564	330	5	325	Seizure disorder	3392	5338	2157	2894	2.43081	1.74747	1.46557	2.63077	2.17538	0.000449301	0.00412762	5.8	3.71077	-0.00262438	single-nuclei	Brain	Caudate nucleus	10X 3' v3	male	387.077	217.538	Seizure disorder	-1.05645	3000	1000	pPDCN5730_GSE178265_cleaned_filtered
Neuron	Non-degenerative	25	GSE178265	pPDCN5730	0.0869439	0	0.590466	6901	6	6895	Seizure disorder	4481.5	8019	2369	3516	2.77072	1.49379	1.49685	3.34474	2.50384	-0.0108452	-0.0166161	13.9458	5.41059	0.0295788	single-nuclei	Brain	Substantia nigra pars compacta Caudate nucleus	10X 3' v3	male	549.746	250.384	Seizure disorder	0.139669	3000	1000	pPDCN5730_GSE178265_cleaned_filtered
Oligodendrocyte	Non-degenerative	25	GSE178265	pPDCN5730	0	0	-0.0304407	190	0	190	Seizure disorder		4248.5		2418.5	3.20974	1.68807		2.11579	1.76316	0.00920944		11.0421	4.52632	0.0740491	single-nuclei	Brain	Caudate nucleus	10X 3' v3	male	465.789	176.316	Seizure disorder	1.68456	3000	1000	pPDCN5730_GSE178265_cleaned_filtered
OPC	Non-degenerative	25	GSE178265	pPDCN5730	0	0	-0.0732572	205	0	205	Seizure disorder		4239		2414	3.18199	1.71584		2.23902	1.80488	0.0125899		10.8488	4.46829	0.0713136	single-nuclei	Brain	Caudate nucleus	10X 3' v3	male	460	180.488	Seizure disorder	1.58692	3000	1000	pPDCN5730_GSE178265_cleaned_filtered
Neuron	Non-degenerative	24	GSE144136	5_Suicide	1.70455	0	-0.700811	352	6	346		3323	4177.5	2172.5	2603.5	2.544	1.70147	1.17396	2.25723	1.88728	0.0116042	-0.0473985	5.58092	3.74277	-0.0355287	single-nuclei	Brain	DLPFC	10X 3' v2	male	375.145	188.728	Control	-0.658114	3000	1000	5_Suicide_GSE144136_cleaned_filtered
Astrocyte	Non-degenerative	24	GSE160189	A76	0.776699	0	-1.23339	515	4	511	Control	4014.5	3788	2004.5	1963	2.68754	0	0	0.00195695	0.00195695	-0.000477761	-0.000283943	6.03914	3.0137	0.0155551	single-nuclei	Brain	Anterior hippocampus	10X 3' v2	male	303.131	0.195695	Control	-0.153016	3000	1000	A76_GSE160189_cleaned_filtered
Neuron	Non-degenerative	24	GSE160189	A76	0.627615	0	-0.355845	956	6	950	Control	3445.5	6025.5	1968.5	2648.5	2.90579	0	0	0.00210526	0.00210526	-0.000942758	-0.00123644	11.6958	4.18105	0.040246	single-nuclei	Brain	Anterior hippocampus	10X 3' v2	male	421.789	0.210526	Control	0.615004	3000	1000	A76_GSE160189_cleaned_filtered
Oligodendrocyte	Non-degenerative	24	GSE160189	A76	0.772532	0	-1.30837	1165	9	1156	Control	3384	3556.5	1771	1828	2.80034	0	0	0	0	-0.000351103	-0.000271968	6.2327	2.91349	0.0168684	single-nuclei	Brain	Anterior hippocampus	10X 3' v2	male	292.993	0	Control	0.243919	3000	1000	A76_GSE160189_cleaned_filtered
Neuron	Non-degenerative	22	GSE144136	32_Suicide	0.633484	0	-0.363422	1105	7	1098		3533	4527	2121	2525	2.68461	1.35604	0	1.66393	1.46084	-0.00857997	-0.0468327	7.26503	4.2031	-0.0098551	single-nuclei	Brain	DLPFC	10X 3' v2	male	420.765	146.084	Control	-0.163329	3000	1000	32_Suicide_GSE144136_cleaned_filtered
Neuron	Non-degenerative	22	GSE144136	33_Suicide	0.298805	0	-0.308644	1004	3	1001		3179	4749	2017	2564	2.69729	1.40291	0	1.91808	1.68731	-0.00179055	-0.0229979	7.57143	4.27273	-0.0051957	single-nuclei	Brain	DLPFC	10X 3' v2	male	428.172	168.731	Control	-0.118711	3000	1000	33_Suicide_GSE144136_cleaned_filtered
Neuron	Non-degenerative	21	GSE144136	27_Control	1.81818	0	-0.609435	220	4	216		3478.5	4531.5	2152.5	2773.5	2.55147	1.67095	1.66671	2.29167	1.93056	0.00554876	-0.0173572	5.99074	3.86111	-0.0356327	single-nuclei	Brain	DLPFC	10X 3' v2	male	387.5	193.056	Control	-0.631861	3000	1000	27_Control_GSE144136_cleaned_filtered
Neuron	Non-degenerative	20	GSE144136	16_Control	0.733945	0	-0.533395	545	4	541		3863	4337	2509.5	2707	2.61229	1.43265	1.79985	1.72089	1.55268	-0.014749	0.0018568	6.09612	3.96673	-0.0272045	single-nuclei	Brain	DLPFC	10X 3' v2	male	397.782	155.268	Control	-0.417816	3000	1000	16_Control_GSE144136_cleaned_filtered
Neuron	Non-degenerative	19	GSE144136	1_Suicide	1.38249	0	-0.584035	1085	15	1070		3407	4798.5	2088	2642.5	2.54507	1.33185	1.4534	1.64206	1.40467	-0.0138291	-0.011222	6.30935	3.90654	-0.0350958	single-nuclei	Brain	DLPFC	10X 3' v2	male	390.935	140.467	Control	-0.654367	3000	1000	1_Suicide_GSE144136_cleaned_filtered
Neuron	Non-degenerative	19	GSE144136	3_Control	1.38408	0	-0.55332	289	4	285		3325.5	4458	1967	2555	2.68867	1.56027	1.67325	1.97193	1.73333	0.00446409	0.00228139	6.78596	3.94737	-0.0195327	single-nuclei	Brain	DLPFC	10X 3' v2	male	395.088	173.333	Control	-0.149056	3000	1000	3_Control_GSE144136_cleaned_filtered
Neuron	Non-degenerative	19	GSE173731	E212	0.368664	0	0.327923	2170	8	2162	Seizure disorder	3704.5	6134.5	1989.5	2911.5	2.76373	1.43977	0	2.54672	4.28353	-0.0415086	-0.0707901	11.0661	4.28353	0.092247	single-nuclei	Brain	Temporal lobe	10X 3' v3	male	514.246	198.242	Seizure disorder	0.115077	3000	1000	E212_GSE173731_cleaned_filtered
Microglia	MS	43	GSE179590	S1	0	0	0.721597	329	0	329	MS		8041		3188	2.84725	2.06816		6.3769	5.57143	0.0802635		14.4103	5.57143	0.166566	single-nuclei	Brain	DLPFC	10X 3' v3	male	567.477	368.085	MS	0.408999	3000	1000	S1_GSE179590_cleaned_filtered
Neuron	Non-degenerative	18	GSE144136	9_Control	0.775194	0	-0.524695	387	3	384		3754	4447.5	2238	2614	2.64364	1.5196	1.29851	1.95312	1.66406	-0.000834395	-0.0491292	6.56771	3.98698	-0.020772	single-nuclei	Brain	DLPFC	10X 3' v2	male	398.958	166.406	Control	-0.307506	3000	1000	9_Control_GSE144136_cleaned_filtered
Astrocyte	Non-degenerative	18	GSE173731	E379	0.49505	0	0.535313	404	2	402	Epilepsy, developmental malformation	3520.5	8828.5	1885	3601	2.48803	1.86411	1.6214	5.6393	4.88308	0.0120631	-0.0183636	11.1741	4.88308	0.0388076	single-nuclei	Brain	Temporal lobe	10X 3' v3	male	542.289	339.055	Epilepsy, developmental malformation	-0.855069	3000	1000	E379_GSE173731_cleaned_filtered
OPC	Non-degenerative	18	GSE173731	E379	0	0	0.439102	222	0	222	Epilepsy, developmental malformation		7041.5		3086.5	2.97151	1.54568		2.96847	4.48649	-0.0301752		14.2568	4.48649	0.113185	single-nuclei	Brain	Temporal lobe	10X 3' v3	male	529.279	211.261	Epilepsy, developmental malformation	0.846264	3000	1000	E379_GSE173731_cleaned_filtered
Astrocyte	Non-degenerative	17	GSE173731	E268	0.846433	0	-0.54044	827	7	820	Epilepsy	4260	5534.5	2327	2739.5	2.39138	1.78306	1.73956	3.23902	3.61585	0.00198251	-0.0112303	6.30366	3.61585	0.0140352	single-nuclei	Brain	Temporal lobe	10X 3' v3	male	396.829	244.756	Epilepsy	-1.19521	3000	1000	E268_GSE173731_cleaned_filtered
Astrocyte	Non-degenerative	17	GSE173731	E361	0.959233	0	-0.590409	834	8	826	Epilepsy, temporal sclerosis	4997	5281.5	2467	2620	2.50657	1.89453	1.32509	3.38499	3.57022	0.0120546	-0.0162722	6.41768	3.57022	0.0245274	single-nuclei	Brain	Temporal lobe	10X 3' v3	male	390.073	240.436	Epilepsy, temporal sclerosis	-0.789853	3000	1000	E361_GSE173731_cleaned_filtered
Fibroblast	Non-degenerative	17	GSE173731	E268	1.36986	0	-0.524695	292	4	288	Epilepsy	3617.5	3947.5	2133.5	2058	2.5911	1.77272	1.95366	2.32639	3.65625	-0.0109859	0.0282491	6.23611	3.65625	0.075608	single-nuclei	Brain	Temporal lobe	10X 3' v3	male	398.958	168.75	Epilepsy	-0.492382	3000	1000	E268_GSE173731_cleaned_filtered
Microglia	Non-degenerative	31	syn25879216	30232	0.305344	0	0.601161	4585	14	4571	Cancer	11624	14434	3243.5	3703	2.40572	3.10874	2.7029	32.6347	5.39379	0.0622636	0.0150575	16.1674	5.39379	0.070529	single-cell	Brain	Frontal lobe	10X 3' v2	male	551.192	582.914	Cancer	-1.14471	3000	1000	30232_syn25879216_cleaned_filtered
Neuron	Non-degenerative	17	GSE173731	E268	0	0	1.01511	1312	0	1312	Epilepsy		8957		3760.5	2.71418	1.53818		4.32698	5.03277	-0.0388604		16.2104	5.03277	0.0837903	single-nuclei	Brain	Temporal lobe	10X 3' v3	male	607.165	285.976	Epilepsy	-0.0592659	3000	1000	E268_GSE173731_cleaned_filtered
Neuron	Non-degenerative	17	GSE173731	E361	0.214477	0	1.67783	1865	4	1861	Epilepsy, temporal sclerosis	4408.5	12515	2077	4568	2.73631	1.50773	1.23331	5.28963	5.74369	-0.0406635	-0.0384308	21.6389	5.74369	0.100836	single-nuclei	Brain	Temporal lobe	10X 3' v3	male	696.776	348.576	Epilepsy, temporal sclerosis	0.0186138	3000	1000	E361_GSE173731_cleaned_filtered
OPC	Non-degenerative	17	GSE173731	E268	0.268097	0	-0.143237	373	1	372	Epilepsy	7610	4099	2719	2216	3.02561	1.68578	1.28871	2.2043	3.61559	-0.00537945	-0.0385394	8.87634	3.61559	0.138163	single-nuclei	Brain	Temporal lobe	10X 3' v3	male	450.538	175.269	Epilepsy	1.03661	3000	1000	E268_GSE173731_cleaned_filtered
OPC	Non-degenerative	17	GSE173731	E361	0.14771	0	-0.0815717	677	1	676	Epilepsy, temporal sclerosis	3992	4083.5	2230	2210	3.14765	1.73657	1.25419	2.14793	3.83728	-0.00685713	-0.062662	9.86243	3.83728	0.148261	single-nuclei	Brain	Temporal lobe	10X 3' v3	male	458.876	169.231	Epilepsy, temporal sclerosis	1.46609	3000	1000	E361_GSE173731_cleaned_filtered
Astrocyte	Non-degenerative	16	GSE173731	E213	2.45399	0	-1.1046	978	24	954	Epilepsy, encephalocele	3683	4092	1975.5	2202.5	2.41238	2.02295	2.02772	3.25262	2.93501	0.0291363	0.0282059	4.74214	2.93501	0.00909425	single-nuclei	Brain	Temporal lobe	10X 3' v3	male	320.545	215.933	Epilepsy, encephalocele	-1.1213	3000	1000	E213_GSE173731_cleaned_filtered
Neuron	Non-degenerative	16	GSE173731	E213	0.251256	0	0.60942	1194	3	1191	Epilepsy, encephalocele	3197	9700	1913	3582	2.85185	1.3494	2.34025	3.73384	4.86062	-0.0449961	0.0167115	18.2846	4.86062	0.0712035	single-nuclei	Brain	Temporal lobe	10X 3' v3	male	552.309	228.799	Epilepsy, encephalocele	0.425191	3000	1000	E213_GSE173731_cleaned_filtered
OPC	Non-degenerative	16	GSE173731	E213	0.628931	0	-0.421036	318	2	316	Epilepsy, encephalocele	3188.5	3751.5	1754	2033.5	3.02951	1.41624	0.990231	1.61076	3.43671	-0.0224539	-0.0464782	7.84177	3.43671	0.121549	single-nuclei	Brain	Temporal lobe	10X 3' v3	male	412.975	130.063	Epilepsy, encephalocele	1.05037	3000	1000	E213_GSE173731_cleaned_filtered
Astrocyte	Non-degenerative	15	PRJNA530977	5242_AMY	2.0979	0	-0.781118	143	3	140	Control	5329	5270	2409	2535	2.4027	1.62197	1.89154	2.53571	1.96429	0.0213513	0.0575633	5.4	3.55714	-0.00783898	single-nuclei	Brain	Amygdala	10X 3' v2	male	364.286	196.429	Control	-1.15535	3000	1000	5242_AMY_PRJNA530977_cleaned_filtered
Astrocyte	Non-degenerative	15	GSE173731	E290	0.465116	0	0.713299	430	2	428	Epilepsy, ASD	3734.5	11170.5	2063	4101.5	2.5169	1.84652	1.66648	6.68458	5.16822	0.0105697	0.0782122	13.5841	5.16822	0.0290467	single-nuclei	Brain	Temporal lobe	10X 3' v3	male	566.355	387.617	Epilepsy, ASD	-0.753497	3000	1000	E290_GSE173731_cleaned_filtered
Microglia	Non-degenerative	27	syn25879216	30239	2.12067	0	-0.716041	3348	71	3277	Cancer	4927	6922	2167	2690	2.12305	2.92917	2.94575	13.9887	3.66677	0.0494177	0.0542545	6.08239	3.66677	0.036688	single-cell	Brain	Temporal lobe	10X 3' v2	male	373.085	427.983	Cancer	-2.13944	3000	1000	30239_syn25879216_cleaned_filtered
Neuron	Non-degenerative	15	GSE173731	E290	0	0	2.36873	1173	0	1173	Epilepsy, ASD		21520		5869	2.73093	1.45149		7.57204	6.54902	-0.0503616		33.4996	6.54902	0.0933685	single-nuclei	Brain	Temporal lobe	10X 3' v3	male	790.196	420.205	Epilepsy, ASD	-0.000323065	3000	1000	E290_GSE173731_cleaned_filtered
Oligodendrocyte	Non-degenerative	15	GSE173731	E290	2.27273	0	-1.01576	264	6	258	Epilepsy, ASD	3196.5	4644	1727.5	2182.5	2.50558	1.65867	1.41944	2.31008	3.0155	-6.2306e-05	-0.0373525	5.63566	3.0155	0.00360856	single-nuclei	Brain	Temporal lobe	10X 3' v3	male	332.558	174.031	Epilepsy, ASD	-0.793316	3000	1000	E290_GSE173731_cleaned_filtered
OPC	Non-degenerative	15	GSE173731	E290	0	0	0.750354	227	0	227	Epilepsy, ASD		8894		3587	2.90553	1.64055		4.03965	4.70485	-0.0136623		15.8282	4.70485	0.11499	single-nuclei	Brain	Temporal lobe	10X 3' v3	male	571.366	273.568	Epilepsy, ASD	0.614065	3000	1000	E290_GSE173731_cleaned_filtered
Astrocyte	Non-degenerative	14	PRJNA530977	4899_AMY	1.81818	0	-0.797748	110	2	108	Control	4336.5	4378.5	2132.5	2242	2.50297	1.6952	0.880089	2.19444	1.82407	0.0248268	-0.0394122	5.37037	3.57407	0.00623195	single-nuclei	Brain	Amygdala	10X 3' v2	male	362.037	182.407	Control	-0.802527	3000	1000	4899_AMY_PRJNA530977_cleaned_filtered
Astrocyte	Non-degenerative	14	GSE173731	E232	0.558659	0	-0.284322	179	1	178	Epilepsy	9207	8169	3019	2979.5	2.27704	1.70078	2.1521	4.26404	3.92697	-0.00455111	0.0219284	8.67978	3.92697	0.0047501	single-nuclei	Brain	Temporal lobe	10X 3' v3	male	431.461	264.607	Epilepsy	-1.59754	3000	1000	E232_GSE173731_cleaned_filtered
Microglia	Non-degenerative	17	GSE173731	E361	2.85714	0	-0.850516	105	3	102	Epilepsy, temporal sclerosis	3377	3471	1836	1922.5	2.55973	2.63789	2.7564	6.21569	3.27451	0.113596	0.0910408	6.59804	3.27451	0.0327105	single-nuclei	Brain	Temporal lobe	10X 3' v3	male	354.902	309.804	Epilepsy, temporal sclerosis	-0.602773	3000	1000	E361_GSE173731_cleaned_filtered
Neuron	Non-degenerative	14	GSE173731	E232	0	0	2.33353	103	0	103	Epilepsy		24195		5787	2.82621	1.04441		4.51456	6.31068	-0.0846648		38.2039	6.31068	0.11835	single-nuclei	Brain	Temporal lobe	10X 3' v3	male	785.437	317.476	Epilepsy	0.334963	3000	1000	E232_GSE173731_cleaned_filtered
Oligodendrocyte	Non-degenerative	14	GSE173731	E232	3.85138	0	-1.44788	2207	85	2122	Epilepsy	3751	4170.5	1861	1984.5	2.37205	1.25036	1.23883	1.295	2.57257	-0.0402048	-0.0426437	4.95523	2.57257	-0.0138194	single-nuclei	Brain	Temporal lobe	10X 3' v3	male	274.128	110.132	Epilepsy	-1.26321	3000	1000	E232_GSE173731_cleaned_filtered
OPC	Non-degenerative	14	GSE173731	E232	0	0	0.147538	138	0	138	Epilepsy		5666		2584	3.18892	1.38077		2.06522	4.35507	-0.0421621		16.5145	4.35507	0.134909	single-nuclei	Brain	Temporal lobe	10X 3' v3	male	489.855	163.043	Epilepsy	1.6113	3000	1000	E232_GSE173731_cleaned_filtered
Astrocyte	Non-degenerative	11	GSE173731	E311	0.453172	0	-0.10064	662	3	659	Seizure disorder	5713	6890	2484	3121	2.50258	1.53688	2.38294	3.07132	4.20789	-0.0320112	0.0941785	8.73596	4.20789	0.0288555	single-nuclei	Brain	Temporal lobe	10X 3' v3	male	456.297	229.894	Seizure disorder	-0.803902	3000	1000	E311_GSE173731_cleaned_filtered
Astrocyte	Non-degenerative	11	GSE173731	E372	0	0	0.797776	270	0	270	Epilepsy, developmental malformation		12417		4001.5	2.56891	1.66016		5.58889	5.17778	-0.0103847		16.4667	5.17778	0.0511603	single-nuclei	Brain	Temporal lobe	10X 3' v3	male	577.778	340.741	Epilepsy, developmental malformation	-0.570463	3000	1000	E372_GSE173731_cleaned_filtered
Microglia	Non-degenerative	15	GSE173731	E290	1.21212	0	-1.007	165	2	163	Epilepsy, ASD	3578	4010	1884.5	2045	2.52686	3.04262	3.42442	9.49693	3.17178	0.179849	0.248887	5.69939	3.17178	0.0325242	single-nuclei	Brain	Temporal lobe	10X 3' v3	male	333.742	337.423	Epilepsy, ASD	-0.718457	3000	1000	E290_GSE173731_cleaned_filtered
Microglia	Non-degenerative	14	GSE173731	E232	3.08642	0	-1.11052	162	5	157	Epilepsy	3342	3704	1498	1750	2.48676	3.01402	3.11994	8.49045	3.05096	0.162146	0.17113	5.24204	3.05096	0.0421076	single-nuclei	Brain	Temporal lobe	10X 3' v3	male	319.745	291.72	Epilepsy	-0.859537	3000	1000	E232_GSE173731_cleaned_filtered
Microglia	Non-degenerative	11	GSE173731	E311	0.833333	0	0.197706	120	1	119	Seizure disorder	3259	4076	1847	2132	2.72345	2.44784	1.96527	7.94958	4.45378	0.0822691	-0.0209496	12.7983	4.45378	0.0582406	single-nuclei	Brain	Temporal lobe	10X 3' v3	male	496.639	357.143	Seizure disorder	-0.0266411	3000	1000	E311_GSE173731_cleaned_filtered
Neuron	Non-degenerative	11	GSE173731	E372	0	0	1.71232	278	0	278	Epilepsy, developmental malformation		15252.5		4562	2.73915	1.35832		5.72662	5.70504	-0.0501749		28.6403	5.70504	0.103202	single-nuclei	Brain	Temporal lobe	10X 3' v3	male	701.439	328.777	Epilepsy, developmental malformation	0.0286	3000	1000	E372_GSE173731_cleaned_filtered
Oligodendrocyte	Non-degenerative	11	GSE173731	E337	0.544959	0	-0.875625	734	4	730	Epilepsy	5303.5	6111	2335.5	2581.5	2.41591	1.56589	1.13589	2.89452	3.12466	-0.0121617	-0.0279984	7.29178	3.12466	-0.0117885	single-nuclei	Brain	Temporal lobe	10X 3' v3	male	351.507	198.356	Epilepsy	-1.10888	3000	1000	E337_GSE173731_cleaned_filtered
Oligodendrocyte	Non-degenerative	11	GSE173731	E372	1.7744	0	-1.01703	1578	28	1550	Epilepsy, developmental malformation	3769.5	4903	1817	2131.5	2.5426	1.43496	1.31848	2.03355	3.05548	-0.0128865	-0.0268448	6.83032	3.05548	0.00588147	single-nuclei	Brain	Temporal lobe	10X 3' v3	male	332.387	160.645	Epilepsy, developmental malformation	-0.663055	3000	1000	E372_GSE173731_cleaned_filtered
OPC	Non-degenerative	11	GSE173731	E311	0	0	0.0597097	386	0	386	Seizure disorder		5207		2551	2.86103	1.67917		3.03109	4.09326	-0.0139429		10.9197	4.09326	0.0965965	single-nuclei	Brain	Temporal lobe	10X 3' v3	male	477.979	213.99	Seizure disorder	0.45748	3000	1000	E311_GSE173731_cleaned_filtered
OPC	Non-degenerative	11	GSE173731	E337	0	0	0.653973	120	0	120	Epilepsy		8724		3521	2.90776	1.70649		5.325	4.76667	-0.00666944		17.525	4.76667	0.0899727	single-nuclei	Brain	Temporal lobe	10X 3' v3	male	558.333	312.5	Epilepsy	0.621925	3000	1000	E337_GSE173731_cleaned_filtered
Pericyte	Non-degenerative	11	GSE173731	E311	0.460829	0	0.475932	217	1	216	Seizure disorder	3730	8080	2042	3523.5	2.24457	1.83037	2.46163	5.22685	4.36574	-0.0104238	0.0912316	8.45833	4.36574	0.0232599	single-nuclei	Brain	Temporal lobe	10X 3' v3	male	534.259	319.444	Seizure disorder	-1.71182	3000	1000	E311_GSE173731_cleaned_filtered
Microglia	Non-degenerative	11	GSE173731	E337	0.414938	0	-0.0393608	241	1	240	Epilepsy	3718	5580	1967	2532.5	2.64084	3.04906	3.50482	13.7792	4.31667	0.155905	0.354285	10.7708	4.31667	0.0596051	single-nuclei	Brain	Temporal lobe	10X 3' v3	male	464.583	388.333	Epilepsy	-0.317343	3000	1000	E337_GSE173731_cleaned_filtered
Astrocyte	Non-degenerative	7	GSE153807	Nuc-RM77-2	0.308642	0	-0.549046	324	1	323	Epilepsy control	3236	6476	1456	2496	2.33996	1.10953	0	1.5356	1.29412	-0.0364761	-0.0788113	6.77399	3.90402	0.179328	single-nuclei	Brain	Temporal cortex	10X 3' v2	male	395.666	129.412	Control	-1.37612	3000	1000	Nuc-RM77-2_GSE153807_cleaned_filtered
Neuron	Non-degenerative	7	GSE153807	Nuc-RM77-2	0.286944	0	1.1941	697	2	695	Epilepsy control	4487.5	11483	1888.5	3924	2.83314	1.08489	1.18043	2.43597	1.84604	-0.047358	-0.0232456	19.5453	6.19137	0.288159	single-nuclei	Brain	Temporal cortex	10X 3' v2	male	631.367	184.604	Control	0.359354	3000	1000	Nuc-RM77-2_GSE153807_cleaned_filtered
OPC	Non-degenerative	7	GSE153807	Nuc-RM77-2	0	0	-0.389381	255	0	255	Epilepsy control		3791		1942	3.16337	1.2244		1.00392	0.882353	-0.0339989		9.45882	4.07451	0.295309	single-nuclei	Brain	Temporal cortex	10X 3' v2	male	417.255	88.2353	Control	1.52138	3000	1000	Nuc-RM77-2_GSE153807_cleaned_filtered
Astrocyte	Non-degenerative	4	PRJNA530977	6032_AMY	2.72109	0	-1.04451	147	4	143	Control	3295	3712	1763	1973	2.55804	1.36776	1.74076	1.44755	1.23776	-0.000520169	0.0207358	4.99301	3.2028	0.0126552	single-nuclei	Brain	Amygdala	10X 3' v2	male	328.671	123.776	Control	-0.608739	3000	1000	6032_AMY_PRJNA530977_cleaned_filtered
OPC	Non-degenerative	4	PRJNA530977	6032_AMY	0.900901	0	-0.160659	111	1	110	Control	3576	3780.5	1681	1978	3.18658	1.33458	1.88598	1.58182	1.30909	0.00541487	0.0219827	9.77273	4.37273	0.119596	single-nuclei	Brain	Amygdala	10X 3' v2	male	448.182	130.909	Control	1.60308	3000	1000	6032_AMY_PRJNA530977_cleaned_filtered
Microglia	Non-degenerative	11	GSE173731	E372	0.406504	0	-0.41134	246	1	245	Epilepsy, developmental malformation	3044	4189	1800	2087	2.66477	2.95077	3.17789	10.0939	3.87347	0.1457	0.127367	9.2449	3.87347	0.053782	single-nuclei	Brain	Temporal lobe	10X 3' v3	male	414.286	337.551	Epilepsy, developmental malformation	-0.233144	3000	1000	E372_GSE173731_cleaned_filtered
Microglia	Non-degenerative	7	GSE137444	RM77	2.67341	0	-0.87771	1384	37	1347	Brain cancer	3720	4233	1935	2181	2.3837	3.11968	3.03223	10.7379	3.67483	0.0184433	-0.00146375	4.96956	3.40609	0.184422	single-cell	Brain	Temporal cortex	10X 3' v2	male	351.225	367.483	Brain cancer	-1.22222	3000	1000	RM77_GSE137444_cleaned_filtered
Oligodendrocyte	Non-degenerative	NA	GSE126836	MD5840	1.63599	0	-1.0336	489	8	481	Control	3148	3797	1828.5	2140	2.53015	1.69206	1.68917	1.89813	1.65489	-0.0150766	0.00434531	5.0395	3.26403	-0.00629335	single-nuclei	Brain	Substantia nigra	10X 3' v2	male	330.146	165.489	Control	-0.706878	3000	1000	MD5840_GSE126836_cleaned_filtered
Oligodendrocyte	Non-degenerative	NA	GSE126836	MD5862	1.96078	0	-1.0051	102	2	100	Control	3451.5	3548.5	1992.5	2038	2.59967	1.82132	2.10261	2.1	1.82	-0.00392303	0.024991	5.03	3.29	-0.00144244	single-nuclei	Brain	Substantia nigra	10X 3' v2	male	334	182	Control	-0.462219	3000	1000	MD5862_GSE126836_cleaned_filtered
Oligodendrocyte	Non-degenerative	NA	GSE126836	MD6060	1.2848	0	-0.801744	934	12	922	Control	3489	3875	2161.5	2278.5	2.46106	1.46666	2.00471	1.7679	1.51302	-0.0330195	0.00718579	4.78742	3.47289	-0.00912683	single-nuclei	Brain	Substantia nigra	10X 3' v2	male	361.497	151.302	Control	-0.950001	3000	1000	MD6060_GSE126836_cleaned_filtered
Oligodendrocyte	Non-degenerative	NA	GSE126836	MD6063	2.3335	0	-0.98561	2057	48	2009	Control	3489	4347	2077	2492	2.34166	1.84748	1.8141	2.5326	2.10851	-0.00572317	-0.00940104	4.39821	3.28074	-0.0189059	single-nuclei	Brain	Substantia nigra	10X 3' v2	male	336.635	210.851	Control	-1.37015	3000	1000	MD6063_GSE126836_cleaned_filtered
OPC	Non-degenerative	NA	GSE126836	MD6060	0	0	-0.335346	114	0	114	Control		3307.5		2088	3.0585	1.44839		1.44737	1.32456	-0.0418459		7.16667	4.07895	0.0368084	single-nuclei	Brain	Substantia nigra	10X 3' v2	male	424.561	132.456	Control	1.15237	3000	1000	MD6060_GSE126836_cleaned_filtered
OPC	Non-degenerative	NA	GSE126836	MD6063	1.72043	0	-0.764589	465	8	457	Control	3438.5	3293	2184	2141	2.92704	1.90375	1.38127	1.99125	1.73961	-0.0181445	-0.0375285	6.29978	3.56674	0.0205719	single-nuclei	Brain	Substantia nigra	10X 3' v2	male	366.521	173.961	Control	0.68977	3000	1000	MD6063_GSE126836_cleaned_filtered
Astrocyte	Non-degenerative	NA	GSE164485	NPBB052	0.775194	0	0.098343	258	2	256	Control	6866.5	7078	2432.5	2691.5	2.65533	1.34697	0	2.67578	1.95312	-0.000534321	-0.0880308	12.418	4.74609	0.162199	single-nuclei	Brain	Brain	10X 3' v3	male	483.203	195.312	Control	-0.266378	3000	1000	NPBB052_GSE164485_cleaned_filtered
Astrocyte	Non-degenerative	NA	GSE164485	NPBB105	0.266667	0	1.24292	375	1	374	Control	5574	17141	2370	4837	2.56921	1.49178	1.8535	5.78342	3.4385	0.00890991	0.0407524	19.9947	6.23797	0.143934	single-nuclei	Brain	Brain	10X 3' v3	male	637.968	343.85	Control	-0.569411	3000	1000	NPBB105_GSE164485_cleaned_filtered
Astrocyte	Non-degenerative	NA	GSE164485	NPBB131	0.4329	0	0.886558	462	2	460	Control	5329	13120	1624	4047.5	2.5845	1.5207	0.715174	4.95652	3.04348	0.0194458	-0.0331083	17.013	5.81522	0.152504	single-nuclei	Brain	Brain	10X 3' v3	male	589.783	304.348	Control	-0.515625	3000	1000	NPBB131_GSE164485_cleaned_filtered
Astrocyte	Non-degenerative	NA	GSE164485	NPBB139	0.518135	0	0.928739	579	3	576	Control	5285	14315.5	2294	4434.5	2.49745	1.45686	1.41024	4.88368	3.14931	0.00157211	0.0155333	16.2604	5.83854	0.124193	single-nuclei	Brain	Brain	10X 3' v3	male	595.486	314.931	Control	-0.821947	3000	1000	NPBB139_GSE164485_cleaned_filtered
Microglia	Non-degenerative	NA	GSE164485	NPBB138	1.02564	0	0.0252226	390	4	386	Control	4442	5597.5	2218.5	2539.5	2.93313	2.35558	1.8765	5.77202	3.06218	0.104077	0.0229757	10.8187	4.62694	0.198257	single-nuclei	Brain	Brain	10X 3' v3	male	473.316	306.218	Control	0.7112	3000	1000	NPBB138_GSE164485_cleaned_filtered
Microglia	Non-degenerative	NA	GSE164485	NPBB139	0.904977	0	0.00306235	221	2	219	Control	5203.5	6593	2086	2759	2.77272	1.88773	0.852845	4.11416	2.51142	0.042311	-0.0393418	10.8402	4.6484	0.165249	single-nuclei	Brain	Brain	10X 3' v3	male	470.32	251.142	Control	0.146732	3000	1000	NPBB139_GSE164485_cleaned_filtered
Neuron	Non-degenerative	NA	GSE164485	NPBB105	0.329489	0	0.517165	607	2	605	Control	3358.5	9011	1720.5	3267	2.78808	0.910628	0.678048	1.89091	1.38843	-0.0479423	-0.0443703	17.714	5.33884	0.185383	single-nuclei	Brain	Brain	10X 3' v3	male	539.835	138.843	Control	0.200757	3000	1000	NPBB105_GSE164485_cleaned_filtered
