# Supplementary material for: Mosaic loss of Chromosome Y in aged human microglia
Source: HighWire-hosted journal article supplement (doi:10.1101/gr.276409.121), 2022-08-30
Supplement: Supplemental_Table_S3.xlsx [file Supplemental_Table_S3.xlsx]

## Sheet: Description
Supplemental Table S3:
Information on the given tabs are found below
Summary of LOY-associated transcriptional events in microglia and comparison with previously published data	Pooled_Microglia_mLATE	Included samples
Contains comparisons with peripheral blood LATE genes from Dumanski et al. 2021, and DE genes associated with sex chromosome ploidy from GSE126712		GSM4886748, GSM4886749, GSM4886750, GSM4886751, GSM4886758, GSM5550501,GSM5550503,Microglia_MO_MCI3,pPDsHSrSNxi1963,pPDsHSrSNxi4775, GSM4886760,GSM4886761,GSM5106119, GSM5106120, GSM5550451, GSM5550475, GSM5550481, GSM5550491, GSM5550495

## Sheet: Pooled_microglia_mLATE
	Supplemental Table 4 | Microglia DE LOY summary in each cohort - Bonferroni (P<0.01)
	This study | Pooled microglia LATE (p<0.1; Bonferroni)							This study | Overlapping donor specific LATE (FDR<0.1)			Dumanski et al. | PBMC LATE Single-cell+Bulk RNAseq				Sex chromosome ploidy syndromes (XO/XX/XY/XXY; GSE126712) | Bulk RNAseq
Gene	p_val	avg_log2FC	pct.exp.LOY	pct.exp.NORMAL	p-value (Bonferroni)	Chr	Broad region	Overlap - Donor specific LATE (FDR<0.1)	Donor IDs		Sig count (out of 7 datasets)	Largest logFC	Min adj.P-value		logFC	P.Value	adj.P.Val	Sig			Microglia LOY DEs
CSF2RA	1.70189e-143	-0.701608	0.535	0.75	9.11889e-139	PAR	PAR	9	pPDsHSrSNxi4775, GSM5550475, GSM5550451, GSM5550495, GSM5550503, Microglia_MO_MCI3, A096/14, A163/17, A277/12		3	-0.228945	2.33703e-25		-0.528652	1.59668e-06	9.91191e-05	***			Region	DE Genes
ROBO1	1.38587e-73	0.750175	0.266	0.13	7.42562e-69	3	Autosomal	6	GSM5550475, GSM5550501, GSM5550491, GSM5550503, A096/14, A163/17		0	-	-		0.974744	1.42121e-10	4.16624e-08	***			non-PAR chrX	3
CD99	1.47511e-69	-0.343836	0.253	0.413	7.90379e-65	PAR	PAR	6	pPDsHSrSNxi4775, GSM5550503, Microglia_MO_MCI3, A096/14, A163/17, A277/12		6	-0.303798	8.98263e-48		-0.556602	5.71579e-16	3.77004e-13	***			Autosomal	172
DHRSX	2.10804e-63	-0.553109	0.275	0.497	1.12951e-58	PAR	PAR	9	pPDsHSrSNxi4775, GSM5550475, GSM5550501, GSM5550503, Microglia_MO_MCI3, A096/14, A163/17, A297/16, A277/12		2	-0.236645	2.42386e-09		-0.794768	8.28065e-21	1.19166e-17	***			MT	8
PTPRM	8.08212e-61	-0.680684	0.322	0.502	4.33048e-56	18	Autosomal	2	GSM5550503, A163/17		0	-	-		-0.279838	0.0154719	0.083705	.			PAR	10
ST6GALNAC3	5.95793e-44	-0.320891	0.623	0.72	3.19232e-39	1	Autosomal	2	GSM5550503, A163/17		0	-	-			0.766865	0.889755				Total	193
SLC25A6	2.58984e-38	-0.243947	0.151	0.257	1.38766e-33	PAR	PAR	2	Microglia_MO_MCI3, A163/17		4	-0.468649	1.86185e-255		-0.819664	5.54362e-23	1.46259e-19	***
PARD3B	1.23541e-37	-0.275605	0.186	0.278	6.61944e-33	2	Autosomal	3	GSM5550491, GSM5550503, A163/17		0	-	-			0.781894	0.896203
KCNIP1	5.77582e-37	-0.585205	0.404	0.56	3.09474e-32	5	Autosomal	3	GSM5550503, Microglia_MO_MCI3, A163/17		0	-	-			-	-
SNTB1	7.82097e-34	0.174105	0.107	0.091	4.19055e-29	8	Autosomal	1	GSM5550503		0	-	-			0.202565	0.431504
DSCAM	1.57177e-32	-0.359129	0.516	0.616	8.4217e-28	21	Autosomal	2	GSM5550503, Microglia_MO_MCI3		0	-	-			-	-
APOE	2.20095e-31	0.35446	0.79	0.822	1.17929e-26	19	Autosomal	3	GSM5550503, Microglia_MO_MCI3, A163/17		0	-	-			-	-
MMRN1	5.55007e-30	-0.198955	0.035	0.092	2.97378e-25	4	Autosomal	2	A096/14, A163/17		0	-	-		0.419558	0.00194236	0.0199529	*
TMEM176B	2.33589e-29	-0.101607	0.291	0.393	1.25159e-24	7	Autosomal	3	GSM5550503, Microglia_MO_MCI3, A163/17		1	1.69956	5.62991e-08			0.383439	0.621019
APBA2	1.90462e-27	-0.418302	0.05	0.197	1.02052e-22	15	Autosomal	1	GSM5550503		0	-	-		-0.442393	2.58515e-08	3.22228e-06	***
IL3RA	1.09022e-26	-0.139932	0.077	0.128	5.84152e-22	PAR	PAR	3	Microglia_MO_MCI3, A163/17, A277/12		2	-0.462935	3.99066e-05		-0.748422	2.05928e-08	2.672e-06	***
CACNA1D	2.00885e-25	-0.266929	0.371	0.49	1.07636e-20	3	Autosomal	3	GSM5550451, GSM5550503, A163/17		0	-	-			0.429652	0.660022
AKAP17A	2.86587e-25	-0.188583	0.103	0.199	1.53556e-20	PAR	PAR	3	GSM5550503, Microglia_MO_MCI3, A163/17		5	-0.185935	1.53612e-05		-0.752714	6.78043e-24	2.68336e-20	***
PAQR5	4.11076e-25	-0.235537	0.014	0.088	2.20259e-20	15	Autosomal	1	GSM5550503		0	-	-			-	-
GRID2	7.83987e-25	-0.183314	0.414	0.516	4.20068e-20	4	Autosomal	2	GSM5550481, GSM5550503		0	-	-			-	-
RORA	2.7834e-23	-0.264041	0.033	0.097	1.49138e-18	9	Autosomal	1	GSM5550503		0	-	-			-	-
ST6GAL1	3.33538e-22	0.103607	0.925	0.947	1.78713e-17	3	Autosomal	1	GSM5550503		0	-	-			0.248894	0.488812
CDC42BPA	3.99023e-22	0.106985	0.123	0.101	2.13801e-17	1	Autosomal	1	GSM5550503		0	-	-		0.619354	8.68497e-07	6.05652e-05	***
SLC22A23	3.99484e-22	-0.394513	0.245	0.364	2.14047e-17	6	Autosomal	1	GSM5550503		0	-	-		-0.20588	0.00808327	0.0541736	.
MIR3667HG	8.93216e-22	0.187009	0.397	0.344	4.78594e-17	22	Autosomal	2	GSM5550491, GSM5550503		0	-	-		0.140965	0.0290626	0.128509
CALCRL-AS1	2.96431e-21	0.251045	0.101	0.081	1.58831e-16	2	Autosomal	2	GSM5550503, A163/17		0	-	-			-	-
PLCXD3	1.47177e-20	-0.127051	0.063	0.102	7.88591e-16	5	Autosomal	2	GSM5550503, A163/17		0	-	-			-	-
GRAMD4	2.1486e-20	-0.135512	0.211	0.302	1.15124e-15	22	Autosomal	1	GSM5550503		0	-	-			0.615197	0.799226
WIPF3	2.47839e-20	-0.250499	0.158	0.26	1.32795e-15	7	Autosomal	2	GSM5550503, A277/12		0	-	-			-	-
SHROOM3	5.20966e-20	-0.517829	0.021	0.112	2.79139e-15	4	Autosomal	1	GSM5550503		0	-	-			-	-
DOCK1	1.15201e-19	0.243179	0.211	0.157	6.17261e-15	10	Autosomal	5	GSM5550501, GSM5550495, GSM5550503, A096/14, A277/12		0	-	-		0.735041	4.54291e-08	5.17369e-06	***
CPNE8	1.25637e-19	0.142492	0.203	0.161	6.73177e-15	12	Autosomal	1	GSM5550503		0	-	-		0.32313	5.94275e-05	0.00158373	**
IGF1	1.95715e-19	-0.149477	0.094	0.15	1.04866e-14	12	Autosomal	2	GSM5550503, A163/17		0	-	-			0.275538	0.516736
TPRG1	2.15289e-19	-0.101155	0.257	0.299	1.15354e-14	3	Autosomal	4	pPDsHSrSNxi4775, GSM5550501, GSM5550503, A277/12		0	-	-		0.315489	0.0148782	0.081807	.
FOXP1	5.32439e-19	-0.33606	0.409	0.594	2.85286e-14	3	Autosomal	2	GSM5550503, Microglia_MO_MCI3		0	-	-		-0.140842	0.0159521	0.0856875	.
APOC1	5.54584e-19	0.190947	0.4	0.45	2.97151e-14	19	Autosomal	2	GSM5550503, Microglia_MO_MCI3		0	-	-			-	-
S100Z	9.59146e-19	-0.412706	0.225	0.364	5.1392e-14	5	Autosomal	2	GSM5550503, A163/17		3	0.680159	5.24447e-05			0.417032	0.649062
IPCEF1	1.26771e-18	0.325481	0.733	0.709	6.79253e-14	6	Autosomal	1	GSM5550503		0	-	-		-0.162104	0.00348443	0.0299937	*
ADAM28	1.30537e-18	-0.12172	0.885	0.926	6.99429e-14	8	Autosomal	2	GSM5550503, A277/12		0	-	-			0.397813	0.633157
RBFOX2	4.31408e-18	0.276831	0.201	0.126	2.31153e-13	22	Autosomal	3	A096/14, A163/17, A277/12		0	-	-		1.26776	1.17102e-13	6.86562e-11	***
XACT	4.79281e-18	0.111568	0.189	0.164	2.56803e-13	X	X	2	GSM5550503, Microglia_MO_MCI3		0	-	-			-	-
ENSG00000249738	5.38294e-18	0.238778	0.278	0.233	2.88423e-13	5	Autosomal	3	GSM5550501, GSM5550503, A163/17		0	-	-			-	-
MT-CO3	6.82372e-18	0.268924	0.825	0.856	3.65622e-13	MT	MT	2	GSM5550503, A163/17		0	-	-		0.129038	0.0492335	0.181845
IQGAP2	7.46469e-18	-0.119738	0.27	0.367	3.99966e-13	5	Autosomal	1	GSM5550503		0	-	-		0.120351	0.0109251	0.0666653	.
CA8	1.60595e-17	-0.274273	0.052	0.116	8.60486e-13	8	Autosomal	1	GSM5550503		0	-	-			0.207667	0.43849
ABCA1	1.87621e-17	-0.585141	0.343	0.533	1.00529e-12	9	Autosomal	1	GSM5550503		0	-	-			0.30491	0.54731
FCHO2	2.01866e-17	-0.131415	0.424	0.51	1.08162e-12	5	Autosomal	1	GSM5550503		0	-	-		0.19871	0.0051696	0.0392968	*
HS3ST4	2.22684e-17	-0.499425	0.77	0.799	1.19316e-12	16	Autosomal	1	GSM5550503		0	-	-			-	-
CYFIP1	2.68353e-17	-0.20088	0.861	0.892	1.43786e-12	15	Autosomal	2	GSM5550501, GSM5550503		0	-	-		0.286291	0.000993889	0.0123982	*
RTN1	2.72046e-17	-0.361975	0.04	0.129	1.45765e-12	14	Autosomal	3	pPDsHSrSNxi1963, GSM5550503, A096/14		0	-	-		0.335829	0.00168627	0.0181351	*
NHSL1	3.439e-17	-0.699971	0.465	0.663	1.84265e-12	6	Autosomal	2	GSM5550503, A163/17		0	-	-		0.296853	0.00423953	0.0342232	*
FAM149A	8.35611e-17	-0.1215	0.646	0.718	4.47729e-12	4	Autosomal	1	GSM5550503		0	-	-			-	-
KCNQ3	1.19461e-16	0.304078	0.823	0.814	6.40081e-12	8	Autosomal	1	GSM5550503		0	-	-			-	-
ALPK3	1.81976e-16	-0.325937	0.042	0.131	9.75045e-12	15	Autosomal	1	GSM5550503		0	-	-		0.412632	0.00912222	0.0592052	.
PGBD5	4.35292e-16	-0.195766	0.07	0.132	2.33234e-11	1	Autosomal	1	GSM5550503		0	-	-			-	-
MCF2L	5.37251e-16	-0.155619	0.616	0.679	2.87865e-11	13	Autosomal	1	GSM5550503		0	-	-			0.895373	0.952045
FRMD4A	7.30339e-16	-0.127836	0.988	0.994	3.91323e-11	10	Autosomal	1	GSM5550503		0	-	-			-	-
LINC01605	2.40977e-15	-0.389541	0.069	0.164	1.29118e-10	8	Autosomal	1	GSM5550503		0	-	-			-	-
MT-CO2	5.23385e-15	0.1548	0.797	0.843	2.80435e-10	MT	MT	2	GSM5550503, A163/17		0	-	-		0.186719	0.0154335	0.0835601	.
SLC9A9	5.69151e-15	-0.163666	0.899	0.94	3.04957e-10	3	Autosomal	2	GSM5550503, A163/17		0	-	-		0.10839	0.0105106	0.0649678	.
CGNL1	5.77154e-15	-0.270564	0.031	0.091	3.09245e-10	15	Autosomal	0	-		0	-	-			-	-
GTPBP6	6.25485e-15	-0.113959	0.062	0.116	3.35141e-10	PAR	PAR	0	-		2	-0.233419	1.18e-07		-0.762661	3.36175e-22	6.65206e-19	***
SAT1	9.14879e-15	-0.133572	0.867	0.885	4.90201e-10	X	X	1	GSM5550503		1	0.256118	7.4768e-07		0.232026	0.0190533	0.0963624	.
LINC00106	1.51622e-14	-0.117012	0.06	0.122	8.12408e-10	PAR	PAR	1	GSM5550503		0	-	-			-	-
FCGBP	1.54852e-14	0.796269	0.485	0.363	8.29712e-10	19	Autosomal	3	GSM5550503, Microglia_MO_MCI3, A163/17		0	-	-			0.820536	0.916734
FAM110B	2.58772e-14	-0.3272	0.18	0.336	1.38653e-09	8	Autosomal	2	GSM5550503, A163/17		0	-	-			0.527541	0.738161
CPED1	2.94607e-14	-0.110578	0.632	0.673	1.57853e-09	7	Autosomal	1	GSM5550503		0	-	-			0.955249	0.980076
MYCBP2	3.49336e-14	0.134783	0.149	0.132	1.87178e-09	5	Autosomal	2	GSM5550503, A277/12		0	-	-			0.544762	0.750725
ASMTL	9.20139e-14	-0.129699	0.05	0.109	4.9302e-09	PAR	PAR	1	GSM5550503		3	-0.22464	0.000485316		-0.739861	3.22102e-24	2.54944e-20	***
RALGAPA2	1.69628e-13	-0.261626	0.587	0.706	9.08886e-09	20	Autosomal	1	GSM5550503		0	-	-			0.555987	0.759218
ITGB5	1.94969e-13	-0.188776	0.359	0.448	1.04466e-08	3	Autosomal	2	GSM5550503, A163/17		0	-	-		0.84261	4.28601e-09	7.37474e-07	***
RHOH	5.14108e-13	-0.180187	0.155	0.231	2.75464e-08	4	Autosomal	1	GSM5550503		0	-	-		-0.20014	0.000225529	0.00423503	**
ITGAL	6.18167e-13	-0.120553	0.238	0.295	3.3122e-08	16	Autosomal	1	GSM5550503		0	-	-		0.107678	0.0157201	0.0847866	.
SRSF7	6.36056e-13	0.128114	0.511	0.497	3.40805e-08	2	Autosomal	1	GSM5550503		0	-	-		0.113463	0.000425257	0.00669833	**
LILRB4	7.92258e-13	-0.243453	0.299	0.411	4.245e-08	19	Autosomal	1	GSM5550503		0	-	-		0.334706	0.001833	0.0192672	*
AFAP1	8.88584e-13	-0.150243	0.058	0.115	4.76112e-08	4	Autosomal	1	GSM5550503		0	-	-			0.537086	0.744986
ADGRD1	1.05629e-12	-0.1749	0.058	0.122	5.65971e-08	12	Autosomal	1	GSM5550503		0	-	-		0.185874	0.0428145	0.166401
TGFBI	1.09944e-12	-0.157248	0.167	0.209	5.8909e-08	5	Autosomal	1	GSM5550503		0	-	-		0.246991	0.00243445	0.0231695	*
LYST	1.22857e-12	-0.153122	0.683	0.766	6.58282e-08	1	Autosomal	3	GSM5550503, Microglia_MO_MCI3, A163/17		0	-	-		0.180691	0.00779279	0.0528534	.
FOXP2	1.37252e-12	-0.111976	0.646	0.699	7.35408e-08	7	Autosomal	1	GSM5550503		0	-	-			-	-
CCDC26	1.45642e-12	-0.17149	0.213	0.29	7.80365e-08	8	Autosomal	1	GSM5550503		0	-	-			-	-
RAMP1	2.16182e-12	-0.229666	0.061	0.136	1.15833e-07	2	Autosomal	1	GSM5550503		0	-	-			0.454448	0.681791
SOX5	2.1988e-12	-0.337248	0.099	0.174	1.17814e-07	12	Autosomal	1	GSM5550503		0	-	-			0.982774	0.991539
RGS16	4.01911e-12	-0.222167	0.068	0.126	2.15348e-07	1	Autosomal	1	GSM5550503		0	-	-			0.0704184	0.227263
UTRN	5.40469e-12	-0.187667	0.653	0.751	2.89589e-07	6	Autosomal	1	GSM5550503		0	-	-			0.81465	0.914085
ZNF710	5.78148e-12	0.241281	0.786	0.779	3.09778e-07	15	Autosomal	1	GSM5550503		0	-	-		0.171963	0.00281116	0.0256932	*
TMEM71	6.39266e-12	-0.128441	0.081	0.133	3.42525e-07	8	Autosomal	2	A163/17, A277/12		1	0.60221	0.00247472			0.188305	0.414315
ARL4C	6.6071e-12	-0.230812	0.068	0.159	3.54015e-07	2	Autosomal	1	GSM5550503		0	-	-			0.721781	0.862659
NPAS3	7.28157e-12	-0.489033	0.257	0.394	3.90154e-07	14	Autosomal	3	GSM5550481, GSM5550503, A163/17		0	-	-			-	-
PLEKHG1	1.20853e-11	-0.244132	0.062	0.144	6.47542e-07	6	Autosomal	2	GSM5550503, A163/17		0	-	-			0.756067	0.883417
PCNX2	1.584e-11	0.206376	0.635	0.566	8.48724e-07	1	Autosomal	1	GSM5550503		0	-	-			-	-
ESRRG	2.03131e-11	-0.516766	0.061	0.139	1.0884e-06	1	Autosomal	1	A163/17		0	-	-			-	-
ZFYVE28	2.30816e-11	0.132131	0.141	0.108	1.23674e-06	4	Autosomal	0	-		0	-	-		0.13819	0.0421611	0.164874
SESTD1	2.488e-11	-0.109356	0.083	0.116	1.3331e-06	2	Autosomal	1	GSM5550503		0	-	-			0.399062	0.634312
BMPR1A	3.42652e-11	-0.162009	0.396	0.493	1.83596e-06	10	Autosomal	1	GSM5550503		0	-	-		-0.296023	6.35973e-05	0.00167233	**
SRGAP3	3.55638e-11	-0.190141	0.467	0.549	1.90554e-06	3	Autosomal	1	GSM5550503		0	-	-			0.213021	0.445401
CECR2	6.71233e-11	-0.25031	0.169	0.259	3.59653e-06	22	Autosomal	1	GSM5550503		0	-	-		0.471501	2.65188e-05	0.00086734	***
CEP112	1.43408e-10	-0.109904	0.048	0.087	7.68396e-06	17	Autosomal	1	GSM5550503		0	-	-		-0.329663	0.000247722	0.00455453	**
CACNB4	1.57576e-10	-0.549521	0.126	0.244	8.4431e-06	2	Autosomal	2	Microglia_MO_MCI3, A163/17		0	-	-		-0.354303	0.00442974	0.0353798	*
MT-ND3	1.73299e-10	0.336287	0.816	0.843	9.28555e-06	MT	MT	2	GSM5550503, A163/17		0	-	-			0.0770013	0.241468
ABCC4	1.77815e-10	-0.153087	0.763	0.809	9.52749e-06	13	Autosomal	1	GSM5550503		0	-	-		0.385788	3.2455e-06	0.00017012	**
CACNB2	2.37341e-10	-0.417272	0.075	0.147	1.2717e-05	10	Autosomal	1	GSM5550503		0	-	-			-	-
ATP8B4	2.69374e-10	0.154563	0.865	0.89	1.44333e-05	15	Autosomal	1	GSM5550503		0	-	-			0.503564	0.720384
LRRC39	3.03213e-10	-0.143261	0.021	0.075	1.62465e-05	1	Autosomal	1	GSM5550503		0	-	-			-	-
CD226	4.86394e-10	-0.160345	0.194	0.272	2.60615e-05	18	Autosomal	2	GSM5550491, GSM5550503		1	-0.417936	0.000668333			0.162887	0.381106
CABLES1	6.52015e-10	-0.242086	0.262	0.386	3.49356e-05	18	Autosomal	1	GSM5550503		0	-	-			-	-
FOSL2	8.91118e-10	-0.185033	0.087	0.152	4.7747e-05	2	Autosomal	1	GSM5550503		0	-	-			0.854314	0.933125
RTTN	9.63281e-10	-0.265048	0.463	0.536	5.16136e-05	18	Autosomal	1	GSM5550503		0	-	-			0.240691	0.479444
C3	1.02939e-09	0.137754	0.818	0.831	5.51559e-05	19	Autosomal	1	GSM5550503		0	-	-			0.195581	0.423304
MBNL1	1.09594e-09	0.113342	0.936	0.948	5.87213e-05	3	Autosomal	1	GSM5550503		0	-	-			0.665956	0.831789
RPS6KA3	1.31748e-09	-0.153775	0.647	0.741	7.05919e-05	X	X	1	GSM5550503		0	-	-		-0.0831209	0.0147524	0.0813978	.
RECK	1.36157e-09	-0.116897	0.343	0.41	7.29544e-05	9	Autosomal	1	GSM5550503		0	-	-		-0.135206	0.00206498	0.0207943	*
WDFY4	1.36193e-09	-0.15892	0.677	0.759	7.29736e-05	10	Autosomal	1	GSM5550503		0	-	-			0.436058	0.666358
SCMH1	1.62935e-09	-0.299928	0.297	0.419	8.73023e-05	1	Autosomal	2	GSM5550503, A163/17		2	-0.261588	0.000186767		-0.230122	1.77097e-08	2.35837e-06	***
MT-ND4	1.96468e-09	0.170713	0.768	0.832	0.00010527	MT	MT	2	GSM5550503, A163/17		0	-	-			0.587067	0.780743
SAMD4A	2.37835e-09	-0.320954	0.386	0.533	0.000127435	14	Autosomal	2	GSM5550503, Microglia_MO_MCI3		0	-	-			0.653329	0.823888
TNFRSF21	3.3492e-09	-0.119218	0.045	0.085	0.000179453	6	Autosomal	1	GSM5550503		0	-	-			0.746294	0.878164
AKT3	3.40295e-09	-0.113359	0.696	0.77	0.000182333	1	Autosomal	1	GSM5550503		0	-	-			0.196497	0.424362
CXCR4	3.46387e-09	-0.221677	0.132	0.239	0.000185598	2	Autosomal	1	GSM5550503		0	-	-			0.0970582	0.278087
SDK1	4.32626e-09	-0.236512	0.699	0.738	0.000231805	7	Autosomal	1	GSM5550503		0	-	-		0.271978	0.0521326	0.187862
LINC00470	5.3333e-09	-0.153404	0.009	0.051	0.000285763	18	Autosomal	1	GSM5550503		0	-	-			-	-
MT-CO1	5.35505e-09	0.117476	0.687	0.78	0.000286929	MT	MT	1	GSM5550503		0	-	-		0.138747	0.00941408	0.0600907	.
PTPRE	5.67264e-09	0.121795	0.84	0.855	0.000303946	10	Autosomal	1	GSM5550503		0	-	-		0.148258	0.00824245	0.0550076	.
PLAUR	5.77567e-09	-0.168494	0.251	0.3	0.000309466	19	Autosomal	1	GSM5550503		0	-	-			0.704175	0.853007
ZFYVE9	7.90967e-09	-0.100446	0.106	0.142	0.000423808	1	Autosomal	0	-		0	-	-		-1.00349	8.43288e-17	7.02592e-14	***
DDB2	9.19332e-09	-0.106853	0.261	0.331	0.000492587	11	Autosomal	1	GSM5550503		0	-	-			0.717939	0.860478
CTSL	1.06271e-08	-0.127243	0.222	0.285	0.000569412	9	Autosomal	1	GSM5550503		0	-	-			0.319804	0.561991
NCKAP5	1.12767e-08	0.186638	0.602	0.6	0.000604218	2	Autosomal	1	GSM5550503		0	-	-			-	-
HTRA1	1.28669e-08	-0.23554	0.471	0.569	0.000689422	10	Autosomal	1	GSM5550503		0	-	-			-	-
STRBP	1.32775e-08	-0.243655	0.406	0.52	0.00071142	9	Autosomal	1	GSM5550503		0	-	-			0.0971507	0.278251
KBTBD12	1.61816e-08	0.106067	0.404	0.412	0.000867024	3	Autosomal	1	GSM5550503		0	-	-			0.129673	0.331994
CARD11	2.09939e-08	-0.14448	0.506	0.589	0.00112487	7	Autosomal	1	GSM5550503		0	-	-		-0.125699	0.00261098	0.0242842	*
SLC25A29	2.10601e-08	-0.137008	0.195	0.272	0.00112842	14	Autosomal	1	GSM5550503		0	-	-			0.778762	0.895091
B2M	2.34367e-08	0.447655	0.728	0.755	0.00125576	15	Autosomal	0	-		1	0.111947	0.000889			0.306369	0.548627
LINC00578	2.60982e-08	-0.32101	0.112	0.235	0.00139837	3	Autosomal	1	GSM5550503		0	-	-			-	-
MRC1	2.88304e-08	-0.158615	0.162	0.192	0.00154476	10	Autosomal	1	A163/17		0	-	-		-0.465382	0.00496749	0.0381911	*
LITAF	3.92153e-08	-0.170072	0.335	0.42	0.00210119	16	Autosomal	1	GSM5550503		3	-0.233056	4.4859e-06			0.19203	0.418999
TMEM163	4.026e-08	-0.170414	0.246	0.306	0.00215717	2	Autosomal	1	GSM5550503		0	-	-			-	-
PAK1	4.11838e-08	-0.134181	0.39	0.461	0.00220667	11	Autosomal	1	GSM5550503		0	-	-		0.160348	0.023945	0.112478
DYSF	4.12493e-08	-0.15405	0.076	0.126	0.00221018	2	Autosomal	1	GSM5550503		0	-	-		0.3516	0.0116394	0.0697279	.
EML1	4.17634e-08	-0.16074	0.236	0.318	0.00223773	14	Autosomal	1	GSM5550503		0	-	-			-	-
HEG1	4.30079e-08	-0.122798	0.123	0.176	0.00230441	3	Autosomal	1	GSM5550503		0	-	-		-0.221963	0.000995764	0.0124118	*
GPR183	4.90957e-08	-0.225321	0.154	0.223	0.00263059	13	Autosomal	1	GSM5550503		0	-	-		-0.33684	0.000147595	0.0030983	**
DLEU7-AS1	5.1527e-08	-0.848485	0.177	0.425	0.00276087	13	Autosomal	1	GSM5550503		0	-	-			-	-
MAMDC2	5.98418e-08	-0.107469	0.124	0.169	0.00320638	9	Autosomal	1	GSM5550503		0	-	-			-	-
MEIS1	6.67823e-08	-0.17703	0.013	0.068	0.00357826	2	Autosomal	1	GSM5550503		0	-	-		0.394768	0.00250539	0.0235933	*
ABCG1	7.24451e-08	-0.454865	0.2	0.386	0.00388168	21	Autosomal	1	GSM5550503		0	-	-		-0.316603	0.000313394	0.00532306	**
APBB1IP	7.34071e-08	0.151407	0.965	0.971	0.00393323	10	Autosomal	1	GSM5550503		0	-	-			0.501194	0.718781
MT-CYB	8.06316e-08	0.204294	0.762	0.803	0.00432032	MT	MT	2	GSM5550503, A163/17		0	-	-			0.334231	0.575765
NPC1	8.27943e-08	-0.196018	0.403	0.5	0.0044362	18	Autosomal	1	A163/17		0	-	-			0.252155	0.492297
IRS2	8.74759e-08	-0.163692	0.464	0.582	0.00468705	13	Autosomal	1	GSM5550503		0	-	-			0.664527	0.831381
PDE4DIP	1.05904e-07	-0.218892	0.215	0.326	0.00567445	1	Autosomal	1	GSM5550503		0	-	-		-0.105133	0.0516622	0.187185
ZNF804A	1.09009e-07	0.121996	0.263	0.248	0.00584082	2	Autosomal	1	GSM5550503		0	-	-		0.286066	0.00455186	0.03601	*
NDST1	1.49715e-07	-0.162726	0.06	0.137	0.0080219	5	Autosomal	0	-		0	-	-		0.212368	0.0087629	0.0574873	.
MT-ND1	1.73135e-07	0.230167	0.634	0.672	0.00927676	MT	MT	2	GSM5550503, A163/17		0	-	-		0.194805	0.0423095	0.165373
ARAP2	1.7612e-07	-0.271865	0.33	0.465	0.00943671	4	Autosomal	1	A163/17		0	-	-			0.257558	0.498044
MT-ND2	1.81853e-07	0.311231	0.628	0.665	0.00974386	MT	MT	2	GSM5550503, A163/17		0	-	-			0.10601	0.293368
PSD3	1.89961e-07	-0.600861	0.267	0.441	0.0101783	8	Autosomal	2	GSM5550501, GSM5550503		0	-	-		0.27064	0.00138799	0.0156718	*
TBC1D14	2.04856e-07	-0.16609	0.595	0.672	0.0109764	4	Autosomal	2	pPDsHSrSNxi1963, GSM5550503		0	-	-			0.776033	0.893727
A2M	2.24225e-07	0.187852	0.746	0.734	0.0120142	12	Autosomal	1	GSM5550503		0	-	-			-	-
RSRP1	2.32734e-07	0.279466	0.624	0.525	0.0124701	1	Autosomal	0	-		0	-	-		0.147542	0.0432028	0.167335
DOCK3	2.42667e-07	-0.302732	0.163	0.274	0.0130023	3	Autosomal	1	GSM5550503		0	-	-			0.604963	0.791844
CYRIB	2.43738e-07	-0.187339	0.956	0.973	0.0130597	8	Autosomal	1	GSM5550503		0	-	-		0.0410719	0.154381	0.368995
FKBP5	2.44861e-07	-0.35191	0.888	0.957	0.0131199	6	Autosomal	2	Microglia_MO_MCI3, A163/17		0	-	-			0.496823	0.715264
SGPL1	3.05062e-07	-0.113075	0.257	0.314	0.0163455	10	Autosomal	1	GSM5550503		0	-	-		0.0774191	0.0063551	0.0455622	*
MS4A4E	3.25008e-07	-0.100807	0.132	0.164	0.0174143	11	Autosomal	1	GSM5550503		0	-	-			0.628965	0.808447
NFE2L2	3.36117e-07	-0.101152	0.604	0.656	0.0180095	2	Autosomal	1	GSM5550503		0	-	-			0.291608	0.533413
ALOX5	3.37423e-07	-0.103318	0.681	0.757	0.0180795	10	Autosomal	1	GSM5550503		0	-	-		0.12609	0.0576184	0.199978
P2RY8	3.51361e-07	-0.467938	0.083	0.214	0.0188263	PAR	PAR	1	A277/12		3	-0.267973	1.96916e-05		-0.891057	1.62802e-19	1.71811e-16	***
SLC43A2	3.54174e-07	-0.189488	0.288	0.384	0.018977	17	Autosomal	1	GSM5550503		0	-	-		0.218908	0.0060811	0.0442185	*
ZFPM2-AS1	3.66866e-07	-0.359486	0.041	0.055	0.019657	8	Autosomal	0	-		0	-	-			-	-
MTSS1	3.70838e-07	-0.209592	0.6	0.68	0.0198699	8	Autosomal	1	GSM5550503		0	-	-		0.14101	0.0193311	0.0973758
SLIT2	4.15745e-07	-0.173695	0.029	0.062	0.022276	4	Autosomal	0	-		0	-	-			-	-
CEBPB	4.26451e-07	0.317197	0.518	0.473	0.0228497	20	Autosomal	1	GSM5550503		0	-	-			0.107493	0.295651
SND1	4.2752e-07	0.129626	0.691	0.698	0.022907	7	Autosomal	1	GSM5550503		0	-	-			0.493219	0.712914
GLCCI1	5.33307e-07	-0.123299	0.304	0.367	0.0285751	7	Autosomal	1	GSM5550503		0	-	-		-0.212846	0.00166596	0.0180251	*
ZMYM2	5.33443e-07	-0.11674	0.648	0.727	0.0285824	13	Autosomal	1	GSM5550503		0	-	-			0.141155	0.349629
IL15	5.54873e-07	0.143173	0.233	0.206	0.0297306	4	Autosomal	0	-		1	0.179903	0.000711728		0.220669	0.0059565	0.0435727	*
CACNA1A	6.22241e-07	0.12256	0.642	0.638	0.0333403	19	Autosomal	3	GSM5550451, GSM5550503, A163/17		0	-	-			-	-
MTUS1	7.0643e-07	-0.162334	0.448	0.542	0.0378512	8	Autosomal	1	GSM5550503		0	-	-			0.212669	0.445054
SLC44A2	7.63003e-07	-0.150626	0.09	0.161	0.0408825	19	Autosomal	1	GSM5550503		0	-	-			0.857979	0.935413
HCK	8.24839e-07	0.127793	0.635	0.638	0.0441957	20	Autosomal	1	GSM5550503		0	-	-		0.272611	0.00391157	0.0323851	*
PAX8-AS1	8.54327e-07	0.337472	0.195	0.076	0.0457757	2	Autosomal	1	A163/17		0	-	-			0.162939	0.381106
PFKP	1.01386e-06	0.217076	0.17	0.111	0.0543237	10	Autosomal	1	A163/17		0	-	-		0.160879	0.0030046	0.0269784	*
PEBP4	1.04749e-06	-0.126078	0.05	0.092	0.0561253	8	Autosomal	1	GSM5550503		0	-	-			-	-
ABCC6	1.09943e-06	-0.109588	0.035	0.083	0.0589086	16	Autosomal	0	-		0	-	-		0.537285	9.65709e-05	0.00229384	**
KIF1B	1.23542e-06	-0.145905	0.336	0.432	0.0661952	1	Autosomal	1	GSM5550503		0	-	-		0.14573	0.00797513	0.053699	.
ZMAT3	1.43305e-06	0.151528	0.463	0.466	0.0767843	3	Autosomal	1	GSM5550503		0	-	-			0.3991	0.634312
GNG7	1.43573e-06	-0.200218	0.694	0.745	0.0769277	19	Autosomal	1	GSM5550503		0	-	-		-0.196533	0.00950301	0.0604876	.
SCIN	1.5344e-06	0.162241	0.651	0.674	0.0822146	7	Autosomal	1	GSM5550503		0	-	-			0.121154	0.319156
USP6NL	1.57995e-06	-0.136558	0.603	0.68	0.0846552	10	Autosomal	1	GSM5550503		0	-	-			0.951665	0.978047
PDE9A	1.68452e-06	-0.218349	0.215	0.309	0.0902582	21	Autosomal	1	GSM5550503		0	-	-		-0.399702	0.000303291	0.00521292	**
ZNF331	1.72369e-06	-0.522799	0.291	0.355	0.0923569	19	Autosomal	1	GSM5550503		0	-	-		-0.233712	0.0466031	0.175691
