# Supplementary material for: Mosaic loss of Chromosome Y in aged human microglia
Source: HighWire-hosted journal article supplement (doi:10.1101/gr.276409.121), 2022-08-30
Supplement: Supplemental_Table_S4.xlsx [file Supplemental_Table_S4.xlsx]

## Sheet: Description
Supplemental Table S4:
Information on the given tabs are found below
HypeR hypergeometic test of genomic region enrichment of mLATEs using a modified version of c1.all.v7.4.symbols.gmt	LATE_region_enrichment_by_donor

## Sheet: LATE_region_enrichment_by_donor
Region	pval	FDR	Signature	Geneset	Overlap	Background	Hits	Donor	logFDR	sig		Donors with signficant PAR loss in LOY microglia
PAR1	7.1e-16	2e-13	29	9	7	6303	LINC00685,CSF2RA,IL3RA,P2RY8,DHRSX,CD99P1,CD99	A277/12	12.699	***		Donor	Diagnosis	Age
PAR1	1.1e-14	3.1e-12	164	10	9	7324	GTPBP6,CSF2RA,IL3RA,SLC25A6,LINC00106,AKAP17A,DHRSX,CD99P1,CD99	A163/17	11.5086	***		A277/12	AD	79
MT	7.5e-13	1.1e-10	164	13	9	7324	MT-RNR1,MT-ND1,MT-ND2,MT-CO2,MT-ATP6,MT-CO3,MT-ND3,MT-ND4,MT-CYB	A163/17	9.95861	***		A163/17	AD	83
PAR1	8e-13	2.3e-10	95	7	7	4918	LINC00685,CSF2RA,IL3RA,SLC25A6,AKAP17A,DHRSX,CD99	Microglia_MO_MCI3	9.63827	***		Microglia_MO_MCI3	MCI	90
PAR1	1.3e-09	3.5e-07	18	6	4	5437	CSF2RA,DHRSX,CD99P1,CD99	A096/14	6.45593	***		A096/14	AD	87
PAR1	2.8e-07	7.8e-05	15	8	3	8181	CSF2RA,DHRSX,CD99	pPDsHSrSNxi4775	4.10791	***		pPDsHSrSNxi4775	PD	75
PAR1	2.7e-06	0.00075	4	3	2	3665	CSF2RA,DHRSX	Donor8	3.12494	***		Donor8	CTL	78
PAR1	1.7e-05	0.0048	8	5	2	5720	CSF2RA,DHRSX	GSM5550475	2.31876	**		GSM5550475	AD	76
MT	2.5e-05	0.007	3052	11	11	7993	MT-ND1,MT-ND2,MT-CO1,MT-CO2,MT-ATP6,MT-CO3,MT-ND3,MT-ND4L,MT-ND4,MT-ND5,MT-CYB	GSM5550503	2.1549	**		GSM5550503	CTL	75
PAR1	0.00047	0.043	3052	11	10	7993	GTPBP6,LINC00685,CSF2RA,SLC25A6,LINC00106,ASMTL-AS1,ASMTL,AKAP17A,DHRSX,CD99	GSM5550503	1.36653	*
chr9q21	0.00049	0.043	3052	36	24	7993	CBWD5,CBWD3,PGM5,PIP5K1B,APBA1,MAMDC2,KLF9,CEMIP2,C9orf85,LINC01504,ZFAND5,ALDH1A1,ANXA1,CARNMT1,NMRK1,OSTF1,GCNT1,VPS13A,TLE4,UBQLN1,AGTPBP1,ISCA1,DAPK1,CTSL	GSM5550503	1.36653	*
chr7q31	0.00062	0.043	3052	25	18	7993	SLC26A3,DLD,PNPLA8,IMMP2L,DOCK4,ZNF277,BMT2,FOXP2,MDFIC,TFEC,CAPZA2,CTTNBP2,LSM8,CPED1,CADPS2,NDUFA5,WASL,POT1	GSM5550503	1.36653	*
chr2q24	0.0015	0.085	3052	17	13	7993	NR4A2,GPD2,CYTIP,PKP4,TANC1,WDSUB1,BAZ2B,RBMS1,TANK,IFIH1,TTC21B,STK39,CERS6	GSM5550503	1.07058	.
PAR1	0.00044	0.12	28	11	2	9655	CSF2RA,DHRSX	pPDsHSrSNxi3887	0.920819
chr8p21	0.0045	0.21	3052	32	20	7993	SH2D4A,CSGALNACT1,LPL,ATP6V1B2,XPO7,FAM160B2,SORBS3,PEBP4,RHOBTB2,TNFRSF10B,TNFRSF10D,SLC25A37,ADAM28,ADAMDEC1,PPP2R2A,BNIP3L,DPYSL2,PTK2B,ELP3,INTS9	GSM5550503	0.677781
PAR1	0.0011	0.31	1	5	1	4557	DHRSX	A297/16	0.508638
chr15q26	0.012	0.46	3052	34	20	7993	ABHD2,ANPEP,ZNF710,IQGAP1,CRTC3,BLM,FES,MAN2A2,SLCO3A1,RGMA,LINC02207,MCTP2,LINC00923,ARRDC4,IGF1R,MEF2A,ADAMTS17,LINS1,LRRK1,CHSY1	GSM5550503	0.337242
PAR1	0.0018	0.51	2	3	1	3306	DHRSX	Donor1	0.29243
chr6q25	0.017	0.52	3052	37	21	7993	UST,TAB2,PPIL4,LATS1,PCMT1,PLEKHG1,MTHFD1L,ZBTB2,ARMT1,CCDC170,ESR1,SYNE1,IPCEF1,ARID1B,ZDHHC14,TULP4,SYTL3,EZR,RSPH3,WTAP,IGF2R	GSM5550503	0.283997
chr5q14	0.019	0.52	3052	31	18	7993	TBCA,AP3B1,SCAMP1,LHFPL2,JMY,TENT2,SERINC5,ZFYVE16,DHFR,CKMT2-AS1,ZCCHC9,SSBP2,VCAN,COX7C,CCNH,MEF2C,MEF2C-AS1,ARRDC3	GSM5550503	0.283997
chr18p11	0.022	0.52	3052	40	22	7993	COLEC12,ENOSF1,LINC00470,SMCHD1,EMILIN2,LPIN2,MYL12B,TGIF1,DLGAP1,LINC00667,EPB41L3,L3MBTL4,PTPRM,ANKRD12,RAB31,VAPA,NAPG,AFG3L2,SPIRE1,PSMG2,LDLRAD4,FAM210A	GSM5550503	0.283997
chr4q24	0.023	0.52	3052	13	9	7993	PPP3CA,SLC39A8,MANBA,UBE2D3,CISD2,TET2,PPA2,INTS12,TBCK	GSM5550503	0.283997
chr4q35	0.024	0.52	3052	17	11	7993	WWC2,TRAPPC11,IRF2,ACSL1,SNX25,ANKRD37,UFSP2,TLR3,FAM149A,CYP4V2,FRG1	GSM5550503	0.283997
chr8q12	0.024	0.52	3052	15	10	7993	LYN,PLAG1,CHCHD7,FAM110B,UBXN2B,SDCBP,CA8,CHD7,ASPH,YTHDF3	GSM5550503	0.283997
chrXp22	0.031	0.58	3052	41	22	7993	PRKX,PUDP,ANOS1,TBL1X,ARHGAP6,TLR7,TMSB4X,RAB9A,MOSPD2,PIR,AP1S2,SYAP1,NHS,CDKL5,PDHA1,SH3KBP1,RPS6KA3,SMS,ACOT9,SAT1,EIF2S3,ZFX	GSM5550503	0.236572
chr2q31	0.036	0.58	3052	37	20	7993	FASTKD1,PPIG,GORASP2,TLK1,ITGA6,MAP3K20,SP3,WIPF1,ATF2,HNRNPA3,NFE2L2,AGPS,RBM45,OSBPL6,PRKRA,PLEKHA3,TTN-AS1,SESTD1,CWC22,ITGA4	GSM5550503	0.236572
chr3q25	0.036	0.58	3052	24	14	7993	ANKUB1,RNF13,EIF2A,SIAH2,MED12L,P2RY12,MBNL1,RAP2B,DHX36,TIPARP,MFSD1,SMC4,KPNA4,PPM1L	GSM5550503	0.236572
chr3p26	0.039	0.58	3052	8	6	7993	LINC01266,CRBN,SUMF1,BHLHE40,ARL8B,EDEM1	GSM5550503	0.236572
chr2q22	0.042	0.58	3052	10	7	7993	CXCR4,HNMT,SPOPL,KYNU,ARHGAP15,GTDC1,ZEB2	GSM5550503	0.236572
chr8p22	0.042	0.58	3052	10	7	7993	MSR1,FGF20,MICU3,CNOT7,MTUS1,ASAH1,PSD3	GSM5550503	0.236572
chr8q11	0.042	0.58	3052	10	7	7993	SPIDR,CEBPD,PRKDC,PCMTD1,ST18,RB1CC1,ATP6V1H	GSM5550503	0.236572
chr13q13	0.043	0.58	3052	14	9	7993	FRY,BRCA2,N4BP2L1,STARD13,SPART,ALG5,SUPT20H,UFM1,NHLRC3	GSM5550503	0.236572
chr3p14	0.047	0.58	3052	29	16	7993	WNT5A,ERC2,CCDC66,ARHGEF3,HESX1,ARF4,DENND6A,FLNB,PXK,FHIT,PTPRG,ATXN7,MAGI1,LRIG1,ARL6IP5,FRMD4B	GSM5550503	0.236572
chr21q22	0.048	0.58	3052	63	31	7993	TIAM1,URB1,EVA1C,SYNJ1,IFNAR1,GART,SON,ITSN1,LINC00649,KCNE1,RUNX1,MORC3,HLCS,TTC3,VPS26C,ETS2,DSCAM,C2CD2,ABCG1,PDE9A,NDUFV3,PKNOX1,PDXK,CSTB,LINC01678,TRPM2,ITGB2,ITGB2-AS1,COL18A1,DIP2A,PRMT2	GSM5550503	0.236572
PAR1	0.0021	0.59	2	6	1	5718	DHRSX	A127/11	0.229148
chr5q21	0.0022	0.62	1	7	1	3183	CHD1	Donor2	0.207608
chr10q11	0.053	0.62	3052	25	14	7993	ZNF33B,CSGALNACT2,HNRNPF,ZNF487,RASSF4,ALOX5,WASHC2C,NCOA4,AGAP9,MAPK8,ARHGAP22,WDFY4,ERCC6,TIMM23B	GSM5550503	0.207608
chr3p12	0.0056	0.65	8	4	1	5720	ROBO1	GSM5550475	0.187087
chr3q11	0.007	0.65	8	5	1	5720	NSUN3	GSM5550475	0.187087
chr4p14	0.061	0.65	3052	21	12	7993	C4orf19,PGM2,TBC1D1,TLR10,TLR1,FAM114A1,TMEM156,KLHL5,LIAS,SMIM14,RHOH,RBM47	GSM5550503	0.187087
chr5p15	0.061	0.65	3052	21	12	7993	PDCD6,BRD9,SLC12A7,LPCAT1,NSUN2,TENT4A,DAP,TRIO,OTULINL,ANKH,MYO10,BASP1	GSM5550503	0.187087
chr1q21	0.069	0.7	3052	67	32	7993	NBPF15,SRGAP2B,RNF115,PEX11B,TXNIP,NBPF12,PRKAB2,FMO5,NBPF14,PDE4DIP,NBPF9,NBPF19,FCGR1A,VPS45,PLEKHO1,C1orf54,MRPS21,PRPF3,ADAMTSL4,MCL1,ENSA,CTSS,SNX27,S100A10,FLG-AS1,INTS3,SLC39A1,TPM3,C1orf43,UBAP2L,IL6R,ADAR	GSM5550503	0.154902
chr7p12	0.074	0.7	3052	5	4	7993	TNS3,UPP1,IKZF1,GRB10	GSM5550503	0.154902
chr4q31	0.076	0.7	3052	35	18	7993	NOCT,ELF2,MGST2,TBC1D9,RNF150,INPP4B,SMARCA5,ABCE1,SMAD1,SLC10A7,PRMT9,ARHGAP10,LRBA,RPS3A,GATB,TIGD4,TRIM2,TLR2	GSM5550503	0.154902
chr1q43	0.08	0.7	3052	7	5	7993	LGALS8,KMO,OPN3,CEP170,SDCCAG8	GSM5550503	0.154902
chr2q34	0.08	0.7	3052	9	6	7993	PIKFYVE,PTH2R,MAP2,RPE,IKZF2,SPAG16	GSM5550503	0.154902
chr11q14	0.082	0.7	3052	24	13	7993	PAK1,AAMDC,GAB2,NARS2,TENM4,PRCP,TMEM126B,PICALM,HIKESHI,ME3,TMEM135,CTSC,CHORDC1	GSM5550503	0.154902
chr14q23	0.082	0.7	3052	33	17	7993	ARMH4,LINC01500,DAAM1,JKAMP,RTN1,PCNX4,PPM1A,SLC38A6,PRKCH,SNAPC1,WDR89,SGPP1,ZBTB25,ZBTB1,FUT8,MPP5,ATP6V1D	GSM5550503	0.154902
chr2p23	0.092	0.73	3052	38	19	7993	ATAD2B,UBXN2A,TP53I3,ITSN2,NCOA1,ADCY3,DTNB,ASXL2,KIF3C,RAB10,HADHB,SELENOI,CENPA,IFT172,RBKS,FOSL2,PPP1CB,CLIP4,YPEL5	GSM5550503	0.136677
chr15q21	0.093	0.73	3052	45	22	7993	SPG11,SORD,SQOR,MYEF2,EID1,COPS2,ATP8B4,USP8,TRPM7,GLDN,DMXL2,TMOD2,TMOD3,MAPK6,MYO5A,FAM214A,RSL24D1,RAB27A,CCPG1,TCF12,AQP9,LIPC	GSM5550503	0.136677
chr5q23	0.095	0.73	3052	20	11	7993	COMMD10,DMXL1,TNFAIP8,HSD17B4,SNX2,SNX24,ZNF608,GRAMD2B,FBN2,SLC27A6,CHSY3	GSM5550503	0.136677
chr4q22	0.1	0.73	3052	18	10	7993	SPP1,PKD2,PPM1K,HERC5,GPRIN3,CCSER1,GRID2,SMARCAD1,HPGDS,PDLIM5	GSM5550503	0.136677
chr13q32	0.1	0.73	3052	18	10	7993	ABCC4,DNAJC3-DT,DNAJC3,MBNL2,RAP2A,FARP1,STK24,UBAC2,GPR183,GGACT	GSM5550503	0.136677
chr14q32	0.1	0.73	3052	62	29	7993	FOXN3,EFCAB11,TDP1,KCNK13,NRDE2,TTC7B,RPS6KA5,DGLUCY,RIN3,LGMN,GOLGA5,DICER1,CLMN,PAPOLA,EML1,EVL,SLC25A29,WDR20,TECPR2,RCOR1,TNFAIP2,EIF5,CKB,PPP1R13B,ATP5MPL,TDRD9,PLD4,NUDT14,PACS2	GSM5550503	0.136677
chr7q21	0.11	0.73	3052	34	17	7993	MAGI2,CD36,SEMA3C,PCLO,ABCB4,SLC25A40,SRI,CDK14,AKAP9,KRIT1,CDK6,SAMD9,SAMD9L,VPS50,SLC25A13,TECPR1,BRI3	GSM5550503	0.136677
chr12p13	0.11	0.73	3052	72	33	7993	KDM5A,ERC1,ADIPOR2,CCND2,C12orf4,CD9,LTBR,GAPDH,IFFO1,LPAR5,ING4,CD4,ATN1,PTPN6,LPCAT3,SLC2A3,CLEC4E,PHC1,M6PR,A2M,CD69,CLEC2B,CLEC12A,CLEC7A,OLR1,GABARAPL1,KLRD1,YBX3,LINC01252,ETV6,LRP6,BORCS5,GPRC5D-AS1	GSM5550503	0.136677
chr13q14	0.11	0.73	3052	48	23	7993	MRPS31,ELF1,VWA8,AKAP11,EPSTI1,TSC22D1,GPALPP1,GTF2F2,RUBCNL,LRCH1,SUCLA2,ITM2B,RB1,LPAR6,RCBTB2,FNDC3A,SETDB2,RCBTB1,KPNA3,DLEU2,DLEU7,RNASEH2B,WDFY2	GSM5550503	0.136677
chr7p21	0.12	0.73	3052	14	8	7993	GLCCI1,ICA1,PHF14,SCIN,ANKMY2,TSPAN13,HDAC9,MACC1	GSM5550503	0.136677
chr12q12	0.12	0.73	3052	14	8	7993	CPNE8,SLC2A13,GXYLT1,ZCRB1,PUS7L,IRAK4,ANO6,ARID2	GSM5550503	0.136677
chrXq24	0.12	0.73	3052	14	8	7993	WDR44,DOCK11,IL13RA1,SLC25A5,NKRF,TMEM255A,LAMP2,MCTS1	GSM5550503	0.136677
chr1q31	0.13	0.73	3052	12	7	7993	TPR,PLA2G4A,RGS18,RGS2,UCHL5,NEK7,PTPRC	GSM5550503	0.136677
chr2p14	0.13	0.73	3052	12	7	7993	VPS54,PELI1,SERTAD2,SLC1A4,MEIS1,C1D,PLEK	GSM5550503	0.136677
chr6p24	0.13	0.73	3052	12	7	7993	RREB1,RIOK1,GCNT2,NEDD9,TMEM170B,HIVEP1,PHACTR1	GSM5550503	0.136677
chr15q13	0.13	0.73	3052	12	7	7993	HERC2,APBA2,TJP1,MTMR10,LINC02256,GOLGA8N,FMN1	GSM5550503	0.136677
PAR1	0.004	0.75	5	3	1	3737	DHRSX	Donor11	0.124939
chr3p12	0.0053	0.75	5	4	1	3737	ROBO1	Donor11	0.124939
chr1p33	0.14	0.75	3052	10	6	7993	UQCRH,MKNK1,ATPAF1,TAL1,CMPK1,SPATA6	GSM5550503	0.124939
chr13q12	0.14	0.75	3052	35	17	7993	PSPC1,ZMYM5,ZMYM2,CRYL1,XPO4,LATS2,ZDHHC20,MICU2,MIPEP,PARP4,MTMR6,NUP58,USP12,UBL3,USPL1,ALOX5AP,HSPH1	GSM5550503	0.124939
chr3q28	0.0055	0.77	15	3	1	8181	TPRG1	pPDsHSrSNxi4775	0.113509
chr2q13	0.15	0.77	3052	8	5	7993	RANBP2,SH3RF3,BCL2L11,ANAPC1,MERTK	GSM5550503	0.113509
chr6p23	0.15	0.77	3052	6	4	7993	GFOD1,SIRT5,RANBP9,CD83	GSM5550503	0.113509
chr7p14	0.15	0.77	3052	26	13	7993	CPVL,WIPF3,MTURN,ZNRF2,KBTBD2,NT5C3A,EEPD1,AOAH,ELMO1,EPDR1,STARD3NL,VPS41,RALA	GSM5550503	0.113509
chr16p12	0.15	0.77	3052	40	19	7993	SMG1,TMC7,SYT17,CLEC19A,ACSM5,THUMPD1,NPIPB4,UQCRC2,CDR2,HS3ST2,GGA2,PALB2,PRKCB,TNRC6A,ARHGAP17,HS3ST4,IL4R,IL21R,XPO6	GSM5550503	0.113509
chr3q27	0.16	0.77	3052	24	12	7993	MCCC1,MCF2L2,B3GNT5,KLHL24,YEATS2,ABCC5,AP2M1,VPS8,MAP3K13,ETV5,ST6GAL1,BCL6	GSM5550503	0.113509
chr6q26	0.16	0.77	3052	4	3	7993	MAP3K4,AGPAT4,PRKN	GSM5550503	0.113509
chr10p15	0.16	0.77	3052	17	9	7993	TUBB8,DIP2C,LARP4B,WDR37,AKR1E2,NET1,ASB13,GDI2,RBM17	GSM5550503	0.113509
chrXp21	0.16	0.77	3052	4	3	7993	IL1RAPL1,GK,TAB3	GSM5550503	0.113509
chr4q22	0.0082	0.77	164	19	3	7324	SNCA,MMRN1,GRID2	A163/17	0.113509
chr15q23	0.17	0.8	3052	15	8	7993	IQCH-AS1,PIAS1,ANP32A,GLCE,PAQR5,RPLP1,TLE3,MYO9A	GSM5550503	0.09691
chr1q32	0.18	0.8	3052	58	26	7993	MIR181A1HG,LINC00862,ZNF281,CAMSAP2,KIF21B,NAV1,RNPEP,PTPN7,KLHL12,ADIPOR1,BTG2,ATP2B4,PIK3C2B,RBBP5,CDK18,RAB7B,SRGAP2,IKBKE,CD55,CR1,CD46,TRAF3IP3,RCOR3,INTS7,ATF3,RPS6KC1	GSM5550503	0.09691
chr12q21	0.18	0.8	3052	22	11	7993	ZFC3H1,RAB21,TBC1D15,NAP1L1,ZDHHC17,NAV3,LIN7A,TMTC2,POC1B,ATP2B1,BTG1	GSM5550503	0.09691
chr16q12	0.18	0.8	3052	22	11	7993	ITFG1,PHKB,N4BP1,HEATR3,TENT4B,ADCY7,NKD1,CYLD,SALL1,MMP2-AS1,LPCAT2	GSM5550503	0.09691
chr14q24	0.0029	0.8	13	48	2	7682	MED6,ADCK1	A402/14	0.09691
chr10q25	0.19	0.84	3052	20	10	7993	GSTO1,ITPRIP,ADD3,MXI1,PDCD4,ACSL5,VTI1A,TCF7L2,CASP7,SHTN1	GSM5550503	0.0757207
chr17q24	0.19	0.84	3052	20	10	7993	CEP112,PRKCA,HELZ,PSMD12,PITPNC1,BPTF,ARSG,SLC16A6,WIPI1,ABCA5	GSM5550503	0.0757207
chr1p13	0.2	0.84	3052	49	22	7993	VAV3,SLC25A24,FAM102B,STXBP3,TMEM167B,PSRC1,SORT1,GSTM4,GSTM3,AHCYL1,CD53,DENND2D,C1orf162,TMIGD3,DDX20,CAPZA1,MOV10,MAGI3,RSBN1,OLFML3,SYT6,SLC22A15	GSM5550503	0.0757207
chr10p13	0.21	0.84	3052	11	6	7993	SEPHS1,FRMD4A,FAM107B,MINDY3,RSU1,VIM	GSM5550503	0.0757207
chr14q13	0.21	0.84	3052	11	6	7993	NPAS3,SNX6,BAZ1A,FAM177A1,PPP2R3C,RALGAPA1	GSM5550503	0.0757207
chr18q22	0.21	0.84	3052	11	6	7993	TMX3,CD226,RTTN,SOCS6,CYB5A,TSHZ1	GSM5550503	0.0757207
chr3p24	0.21	0.85	3052	18	9	7993	RFTN1,TBC1D5,KAT2B,RPL15,NR1D2,SLC4A7,CMC1,AZI2,TGFBR2	GSM5550503	0.0705811
chr14q13	0.0059	0.92	4	8	1	5456	NPAS3	GSM5550481	0.0362122
chr18q22	0.0066	0.92	4	9	1	5456	SOCS6	GSM5550481	0.0362122
chr3p14	0.013	0.92	4	18	1	5456	PTPRG	GSM5550481	0.0362122
chr4q22	0.013	0.92	4	18	1	5456	GRID2	GSM5550481	0.0362122
chr12q14	0.23	0.92	3052	16	8	7993	SLC16A7,USP15,MON2,PPM1H,SRGAP1,RASSF3,GNS,HELB	GSM5550503	0.0362122
chr6q21	0.25	0.94	3052	33	15	7993	ATG5,CRYBG1,RTN4IP1,OSTM1,AFG1L,FOXO3,ARMC2,CD164,ZBTB24,FIG4,CDC40,AMD1,SLC16A10,REV3L,TUBE1	GSM5550503	0.0268721
chr10q23	0.25	0.94	3052	33	15	7993	TSPAN14,BMPR1A,SHLD2,PAPSS2,STAMBPL1,CH25H,IFIT2,IFIT3,KIF20B,LINC00865,PCGF5,HECTD2,IDE,EXOC6,MYOF	GSM5550503	0.0268721
chr2q32	0.25	0.95	3052	21	10	7993	AC096667.1,ZNF804A,ITGAV,TFPI,MFSD6,STAT1,STAT4,NABP1,SLC39A10,STK17B	GSM5550503	0.0222764
chr13q22	0.26	0.95	3052	7	4	7993	KLF12,TBC1D4,LMO7,KCTD12	GSM5550503	0.0222764
chr22q13	0.26	0.96	3052	83	35	7993	CYTH4,GGA1,BAIAP2L2,TPTEP2-CSNK1E,JOSD1,GTPBP1,PDGFB,TNRC6B,ST13,EP300,ACO2,SNU13,WBP2NL,NFAM1,ARFGAP3,PNPLA3,SAMM50,PARVB,PRR5,PRR5-ARHGAP8,NUP50-DT,FAM118A,TTC38,CELSR1,GRAMD4,C22orf34,BRD1,ZBED4,PIM3,SELENOO,TUBGCP6,PLXNB2,PPP6R2,TYMP,ODF3B	GSM5550503	0.0177288
chr2p22	0.011	1	2	18	1	3306	SLC8A1	Donor1	0
chr1p12	1	1	2	3	0	3306		Donor1	0
chr1p13	1	1	2	22	0	3306		Donor1	0
chr1p21	1	1	2	6	0	3306		Donor1	0
chr1p22	1	1	2	12	0	3306		Donor1	0
chr1p31	1	1	2	15	0	3306		Donor1	0
chr1p32	1	1	2	14	0	3306		Donor1	0
chr1p33	1	1	2	3	0	3306		Donor1	0
chr1p34	1	1	2	26	0	3306		Donor1	0
chr1p35	1	1	2	17	0	3306		Donor1	0
chr1p36	1	1	2	55	0	3306		Donor1	0
chr1q21	1	1	2	25	0	3306		Donor1	0
chr1q22	1	1	2	6	0	3306		Donor1	0
chr1q23	1	1	2	9	0	3306		Donor1	0
chr1q24	1	1	2	9	0	3306		Donor1	0
chr1q25	1	1	2	21	0	3306		Donor1	0
chr1q31	1	1	2	5	0	3306		Donor1	0
chr1q32	1	1	2	22	0	3306		Donor1	0
chr1q41	1	1	2	7	0	3306		Donor1	0
chr1q42	1	1	2	18	0	3306		Donor1	0
chr1q43	1	1	2	3	0	3306		Donor1	0
chr2p11	1	1	2	9	0	3306		Donor1	0
chr2p12	1	1	2	1	0	3306		Donor1	0
chr2p13	1	1	2	12	0	3306		Donor1	0
chr2p14	1	1	2	8	0	3306		Donor1	0
chr2p15	1	1	2	7	0	3306		Donor1	0
chr2p16	1	1	2	11	0	3306		Donor1	0
chr2p21	1	1	2	12	0	3306		Donor1	0
chr2p23	1	1	2	16	0	3306		Donor1	0
chr2p24	1	1	2	2	0	3306		Donor1	0
chr2p25	1	1	2	7	0	3306		Donor1	0
chr2q11	1	1	2	12	0	3306		Donor1	0
chr2q12	1	1	2	4	0	3306		Donor1	0
chr2q13	1	1	2	5	0	3306		Donor1	0
chr2q14	1	1	2	15	0	3306		Donor1	0
chr2q21	1	1	2	9	0	3306		Donor1	0
chr2q22	1	1	2	6	0	3306		Donor1	0
chr2q23	1	1	2	8	0	3306		Donor1	0
chr2q24	1	1	2	9	0	3306		Donor1	0
chr2q31	1	1	2	16	0	3306		Donor1	0
chr2q32	1	1	2	11	0	3306		Donor1	0
chr2q33	1	1	2	24	0	3306		Donor1	0
chr2q34	1	1	2	3	0	3306		Donor1	0
chr2q35	1	1	2	6	0	3306		Donor1	0
chr2q36	1	1	2	8	0	3306		Donor1	0
chr3p11	1	1	2	1	0	3306		Donor1	0
chr3p12	1	1	2	2	0	3306		Donor1	0
chr3p13	1	1	2	4	0	3306		Donor1	0
chr3p14	1	1	2	14	0	3306		Donor1	0
chr3p21	1	1	2	28	0	3306		Donor1	0
chr3p22	1	1	2	17	0	3306		Donor1	0
chr3p23	1	1	2	1	0	3306		Donor1	0
chr3p24	1	1	2	12	0	3306		Donor1	0
chr3p25	1	1	2	14	0	3306		Donor1	0
chr3p26	1	1	2	4	0	3306		Donor1	0
chr3q11	1	1	2	3	0	3306		Donor1	0
chr3q12	1	1	2	5	0	3306		Donor1	0
chr3q13	1	1	2	14	0	3306		Donor1	0
chr3q21	1	1	2	14	0	3306		Donor1	0
chr3q22	1	1	2	13	0	3306		Donor1	0
chr3q23	1	1	2	6	0	3306		Donor1	0
chr3q25	1	1	2	11	0	3306		Donor1	0
chr3q26	1	1	2	17	0	3306		Donor1	0
chr3q27	1	1	2	12	0	3306		Donor1	0
chr3q28	1	1	2	3	0	3306		Donor1	0
chr3q29	1	1	2	13	0	3306		Donor1	0
chr4p11	1	1	2	3	0	3306		Donor1	0
chr4p12	1	1	2	1	0	3306		Donor1	0
chr4p13	1	1	2	1	0	3306		Donor1	0
chr4p14	1	1	2	11	0	3306		Donor1	0
chr4p15	1	1	2	12	0	3306		Donor1	0
chr4p16	1	1	2	23	0	3306		Donor1	0
chr4q12	1	1	2	6	0	3306		Donor1	0
chr4q22	1	1	2	12	0	3306		Donor1	0
chr4q24	1	1	2	7	0	3306		Donor1	0
chr4q25	1	1	2	4	0	3306		Donor1	0
chr4q26	1	1	2	3	0	3306		Donor1	0
chr4q27	1	1	2	1	0	3306		Donor1	0
chr4q31	1	1	2	17	0	3306		Donor1	0
chr4q32	1	1	2	7	0	3306		Donor1	0
chr4q33	1	1	2	3	0	3306		Donor1	0
chr4q35	1	1	2	6	0	3306		Donor1	0
chr5p12	1	1	2	2	0	3306		Donor1	0
chr5p13	1	1	2	10	0	3306		Donor1	0
chr5p14	1	1	2	0	0	3306		Donor1	0
chr5p15	1	1	2	11	0	3306		Donor1	0
chr5q11	1	1	2	10	0	3306		Donor1	0
chr5q12	1	1	2	7	0	3306		Donor1	0
chr5q13	1	1	2	9	0	3306		Donor1	0
chr5q14	1	1	2	18	0	3306		Donor1	0
chr5q15	1	1	2	8	0	3306		Donor1	0
chr5q21	1	1	2	7	0	3306		Donor1	0
chr5q22	1	1	2	4	0	3306		Donor1	0
chr5q23	1	1	2	10	0	3306		Donor1	0
chr5q31	1	1	2	19	0	3306		Donor1	0
chr5q33	1	1	2	11	0	3306		Donor1	0
chr5q34	1	1	2	0	0	3306		Donor1	0
chr5q35	1	1	2	29	0	3306		Donor1	0
chr6p11	1	1	2	1	0	3306		Donor1	0
chr6p21	1	1	2	29	0	3306		Donor1	0
chr6p22	1	1	2	16	0	3306		Donor1	0
chr6p23	1	1	2	1	0	3306		Donor1	0
chr6p24	1	1	2	5	0	3306		Donor1	0
chr6p25	1	1	2	13	0	3306		Donor1	0
chr6q11	1	1	2	0	0	3306		Donor1	0
chr6q12	1	1	2	2	0	3306		Donor1	0
chr6q13	1	1	2	5	0	3306		Donor1	0
chr6q14	1	1	2	9	0	3306		Donor1	0
chr6q15	1	1	2	6	0	3306		Donor1	0
chr6q16	1	1	2	4	0	3306		Donor1	0
chr6q21	1	1	2	15	0	3306		Donor1	0
chr6q22	1	1	2	8	0	3306		Donor1	0
chr6q23	1	1	2	8	0	3306		Donor1	0
chr6q24	1	1	2	10	0	3306		Donor1	0
chr6q25	1	1	2	16	0	3306		Donor1	0
chr6q26	1	1	2	3	0	3306		Donor1	0
chr6q27	1	1	2	5	0	3306		Donor1	0
chr7p11	1	1	2	2	0	3306		Donor1	0
chr7p12	1	1	2	2	0	3306		Donor1	0
chr7p13	1	1	2	6	0	3306		Donor1	0
chr7p14	1	1	2	10	0	3306		Donor1	0
chr7p15	1	1	2	8	0	3306		Donor1	0
chr7p21	1	1	2	7	0	3306		Donor1	0
chr7p22	1	1	2	19	0	3306		Donor1	0
chr7q11	1	1	2	23	0	3306		Donor1	0
chr7q21	1	1	2	14	0	3306		Donor1	0
chr7q22	1	1	2	18	0	3306		Donor1	0
chr7q31	1	1	2	14	0	3306		Donor1	0
chr7q32	1	1	2	7	0	3306		Donor1	0
chr7q33	1	1	2	6	0	3306		Donor1	0
chr7q34	1	1	2	8	0	3306		Donor1	0
chr7q35	1	1	2	1	0	3306		Donor1	0
chr7q36	1	1	2	15	0	3306		Donor1	0
chr8p11	1	1	2	9	0	3306		Donor1	0
chr8p12	1	1	2	5	0	3306		Donor1	0
chr8p21	1	1	2	16	0	3306		Donor1	0
chr8p22	1	1	2	7	0	3306		Donor1	0
chr8p23	1	1	2	9	0	3306		Donor1	0
chr8q11	1	1	2	7	0	3306		Donor1	0
chr8q12	1	1	2	10	0	3306		Donor1	0
chr8q13	1	1	2	5	0	3306		Donor1	0
chr8q21	1	1	2	7	0	3306		Donor1	0
chr8q22	1	1	2	14	0	3306		Donor1	0
chr8q23	1	1	2	3	0	3306		Donor1	0
chr8q24	1	1	2	30	0	3306		Donor1	0
chr9p11	1	1	2	0	0	3306		Donor1	0
chr9p12	1	1	2	0	0	3306		Donor1	0
chr9p13	1	1	2	10	0	3306		Donor1	0
chr9p23	1	1	2	0	0	3306		Donor1	0
chr9p24	1	1	2	11	0	3306		Donor1	0
chr9q12	1	1	2	0	0	3306		Donor1	0
chr9q13	1	1	2	1	0	3306		Donor1	0
chr9q21	1	1	2	16	0	3306		Donor1	0
chr9q22	1	1	2	21	0	3306		Donor1	0
chr9q31	1	1	2	9	0	3306		Donor1	0
chr9q32	1	1	2	5	0	3306		Donor1	0
chr9q33	1	1	2	20	0	3306		Donor1	0
chr9q34	1	1	2	17	0	3306		Donor1	0
chr10p12	1	1	2	12	0	3306		Donor1	0
chr10p13	1	1	2	4	0	3306		Donor1	0
chr10p14	1	1	2	8	0	3306		Donor1	0
chr10p15	1	1	2	9	0	3306		Donor1	0
chr10q11	1	1	2	10	0	3306		Donor1	0
chr10q21	1	1	2	8	0	3306		Donor1	0
chr10q22	1	1	2	26	0	3306		Donor1	0
chr10q23	1	1	2	20	0	3306		Donor1	0
chr10q24	1	1	2	21	0	3306		Donor1	0
chr10q25	1	1	2	6	0	3306		Donor1	0
chr10q26	1	1	2	19	0	3306		Donor1	0
chr11p11	1	1	2	13	0	3306		Donor1	0
chr11p12	1	1	2	1	0	3306		Donor1	0
chr11p14	1	1	2	1	0	3306		Donor1	0
chr11q12	1	1	2	8	0	3306		Donor1	0
chr11q13	1	1	2	38	0	3306		Donor1	0
chr11q14	1	1	2	12	0	3306		Donor1	0
chr11q22	1	1	2	7	0	3306		Donor1	0
chr11q23	1	1	2	12	0	3306		Donor1	0
chr11q24	1	1	2	8	0	3306		Donor1	0
chr11q25	1	1	2	1	0	3306		Donor1	0
chr12p11	1	1	2	10	0	3306		Donor1	0
chr12p12	1	1	2	12	0	3306		Donor1	0
chr12p13	1	1	2	25	0	3306		Donor1	0
chr12q12	1	1	2	9	0	3306		Donor1	0
chr12q13	1	1	2	29	0	3306		Donor1	0
chr12q14	1	1	2	9	0	3306		Donor1	0
chr12q15	1	1	2	7	0	3306		Donor1	0
chr12q21	1	1	2	12	0	3306		Donor1	0
chr12q22	1	1	2	5	0	3306		Donor1	0
chr12q23	1	1	2	18	0	3306		Donor1	0
chr12q24	1	1	2	43	0	3306		Donor1	0
chr13q11	1	1	2	0	0	3306		Donor1	0
chr13q12	1	1	2	15	0	3306		Donor1	0
chr13q13	1	1	2	6	0	3306		Donor1	0
chr13q14	1	1	2	28	0	3306		Donor1	0
chr13q22	1	1	2	4	0	3306		Donor1	0
chr13q31	1	1	2	1	0	3306		Donor1	0
chr13q32	1	1	2	11	0	3306		Donor1	0
chr13q33	1	1	2	3	0	3306		Donor1	0
chr14q11	1	1	2	6	0	3306		Donor1	0
chr14q12	1	1	2	5	0	3306		Donor1	0
chr14q13	1	1	2	6	0	3306		Donor1	0
chr14q21	1	1	2	6	0	3306		Donor1	0
chr14q22	1	1	2	11	0	3306		Donor1	0
chr14q23	1	1	2	13	0	3306		Donor1	0
chr14q24	1	1	2	21	0	3306		Donor1	0
chr14q31	1	1	2	4	0	3306		Donor1	0
chr14q32	1	1	2	32	0	3306		Donor1	0
chr15q11	1	1	2	3	0	3306		Donor1	0
chr15q12	1	1	2	0	0	3306		Donor1	0
chr15q13	1	1	2	6	0	3306		Donor1	0
chr15q14	1	1	2	5	0	3306		Donor1	0
chr15q15	1	1	2	16	0	3306		Donor1	0
chr15q21	1	1	2	24	0	3306		Donor1	0
chr15q22	1	1	2	19	0	3306		Donor1	0
chr15q23	1	1	2	9	0	3306		Donor1	0
chr15q24	1	1	2	11	0	3306		Donor1	0
chr15q25	1	1	2	11	0	3306		Donor1	0
chr15q26	1	1	2	9	0	3306		Donor1	0
chr16p11	1	1	2	7	0	3306		Donor1	0
chr16p12	1	1	2	19	0	3306		Donor1	0
chr16p13	1	1	2	34	0	3306		Donor1	0
chr16q11	1	1	2	1	0	3306		Donor1	0
chr16q12	1	1	2	13	0	3306		Donor1	0
chr16q13	1	1	2	3	0	3306		Donor1	0
chr16q21	1	1	2	3	0	3306		Donor1	0
chr16q22	1	1	2	15	0	3306		Donor1	0
chr16q23	1	1	2	9	0	3306		Donor1	0
chr16q24	1	1	2	19	0	3306		Donor1	0
chr17p11	1	1	2	11	0	3306		Donor1	0
chr17p12	1	1	2	3	0	3306		Donor1	0
chr17p13	1	1	2	27	0	3306		Donor1	0
chr17q11	1	1	2	24	0	3306		Donor1	0
chr17q12	1	1	2	10	0	3306		Donor1	0
chr17q21	1	1	2	29	0	3306		Donor1	0
chr17q22	1	1	2	5	0	3306		Donor1	0
chr17q23	1	1	2	18	0	3306		Donor1	0
chr17q24	1	1	2	9	0	3306		Donor1	0
chr17q25	1	1	2	33	0	3306		Donor1	0
chr18p11	1	1	2	17	0	3306		Donor1	0
chr18q11	1	1	2	10	0	3306		Donor1	0
chr18q12	1	1	2	13	0	3306		Donor1	0
chr18q21	1	1	2	19	0	3306		Donor1	0
chr18q22	1	1	2	6	0	3306		Donor1	0
chr18q23	1	1	2	7	0	3306		Donor1	0
chr19p12	1	1	2	4	0	3306		Donor1	0
chr19p13	1	1	2	71	0	3306		Donor1	0
chr19q13	1	1	2	53	0	3306		Donor1	0
chr20p11	1	1	2	9	0	3306		Donor1	0
chr20p12	1	1	2	10	0	3306		Donor1	0
chr20p13	1	1	2	12	0	3306		Donor1	0
chr20q11	1	1	2	23	0	3306		Donor1	0
chr20q12	1	1	2	4	0	3306		Donor1	0
chr20q13	1	1	2	30	0	3306		Donor1	0
chr21p11	1	1	2	0	0	3306		Donor1	0
chr21p12	1	1	2	0	0	3306		Donor1	0
chr21q11	1	1	2	1	0	3306		Donor1	0
chr21q21	1	1	2	5	0	3306		Donor1	0
chr21q22	1	1	2	35	0	3306		Donor1	0
chr22q11	1	1	2	13	0	3306		Donor1	0
chr22q12	1	1	2	16	0	3306		Donor1	0
chr22q13	1	1	2	31	0	3306		Donor1	0
chrXp11	1	1	2	15	0	3306		Donor1	0
chrXp21	1	1	2	2	0	3306		Donor1	0
chrXp22	1	1	2	14	0	3306		Donor1	0
chrXq11	1	1	2	0	0	3306		Donor1	0
chrXq12	1	1	2	2	0	3306		Donor1	0
chrXq13	1	1	2	7	0	3306		Donor1	0
chrXq21	1	1	2	5	0	3306		Donor1	0
chrXq22	1	1	2	3	0	3306		Donor1	0
chrXq23	1	1	2	3	0	3306		Donor1	0
chrXq24	1	1	2	3	0	3306		Donor1	0
chrXq25	1	1	2	3	0	3306		Donor1	0
chrXq26	1	1	2	7	0	3306		Donor1	0
chrXq27	1	1	2	1	0	3306		Donor1	0
chrXq28	1	1	2	6	0	3306		Donor1	0
PAR2	1	1	2	0	0	3306		Donor1	0
chrYp11	1	1	2	1	0	3306		Donor1	0
chrYq11	1	1	2	4	0	3306		Donor1	0
MT	1	1	2	11	0	3306		Donor1	0
chr1p12	1	1	1	3	0	3183		Donor2	0
chr1p13	1	1	1	21	0	3183		Donor2	0
chr1p21	1	1	1	5	0	3183		Donor2	0
chr1p22	1	1	1	12	0	3183		Donor2	0
chr1p31	1	1	1	16	0	3183		Donor2	0
chr1p32	1	1	1	13	0	3183		Donor2	0
chr1p33	1	1	1	4	0	3183		Donor2	0
chr1p34	1	1	1	28	0	3183		Donor2	0
chr1p35	1	1	1	19	0	3183		Donor2	0
chr1p36	1	1	1	53	0	3183		Donor2	0
chr1q21	1	1	1	22	0	3183		Donor2	0
chr1q22	1	1	1	7	0	3183		Donor2	0
chr1q23	1	1	1	9	0	3183		Donor2	0
chr1q24	1	1	1	8	0	3183		Donor2	0
chr1q25	1	1	1	18	0	3183		Donor2	0
chr1q31	1	1	1	6	0	3183		Donor2	0
chr1q32	1	1	1	18	0	3183		Donor2	0
chr1q41	1	1	1	4	0	3183		Donor2	0
chr1q42	1	1	1	19	0	3183		Donor2	0
chr1q43	1	1	1	5	0	3183		Donor2	0
chr2p11	1	1	1	8	0	3183		Donor2	0
chr2p12	1	1	1	2	0	3183		Donor2	0
chr2p13	1	1	1	13	0	3183		Donor2	0
chr2p14	1	1	1	7	0	3183		Donor2	0
chr2p15	1	1	1	6	0	3183		Donor2	0
chr2p16	1	1	1	12	0	3183		Donor2	0
chr2p21	1	1	1	11	0	3183		Donor2	0
chr2p22	1	1	1	14	0	3183		Donor2	0
chr2p23	1	1	1	15	0	3183		Donor2	0
chr2p24	1	1	1	3	0	3183		Donor2	0
chr2p25	1	1	1	7	0	3183		Donor2	0
chr2q11	1	1	1	10	0	3183		Donor2	0
chr2q12	1	1	1	4	0	3183		Donor2	0
chr2q13	1	1	1	5	0	3183		Donor2	0
chr2q14	1	1	1	14	0	3183		Donor2	0
chr2q21	1	1	1	10	0	3183		Donor2	0
chr2q22	1	1	1	7	0	3183		Donor2	0
chr2q23	1	1	1	7	0	3183		Donor2	0
chr2q24	1	1	1	9	0	3183		Donor2	0
chr2q31	1	1	1	15	0	3183		Donor2	0
chr2q32	1	1	1	8	0	3183		Donor2	0
chr2q33	1	1	1	22	0	3183		Donor2	0
chr2q34	1	1	1	4	0	3183		Donor2	0
chr2q35	1	1	1	6	0	3183		Donor2	0
chr2q36	1	1	1	8	0	3183		Donor2	0
chr3p11	1	1	1	1	0	3183		Donor2	0
chr3p12	1	1	1	2	0	3183		Donor2	0
chr3p13	1	1	1	4	0	3183		Donor2	0
chr3p14	1	1	1	13	0	3183		Donor2	0
chr3p21	1	1	1	31	0	3183		Donor2	0
chr3p22	1	1	1	18	0	3183		Donor2	0
chr3p23	1	1	1	1	0	3183		Donor2	0
chr3p24	1	1	1	11	0	3183		Donor2	0
chr3p25	1	1	1	13	0	3183		Donor2	0
chr3p26	1	1	1	3	0	3183		Donor2	0
chr3q11	1	1	1	3	0	3183		Donor2	0
chr3q12	1	1	1	4	0	3183		Donor2	0
chr3q13	1	1	1	14	0	3183		Donor2	0
chr3q21	1	1	1	15	0	3183		Donor2	0
chr3q22	1	1	1	11	0	3183		Donor2	0
chr3q23	1	1	1	5	0	3183		Donor2	0
chr3q25	1	1	1	10	0	3183		Donor2	0
chr3q26	1	1	1	18	0	3183		Donor2	0
chr3q27	1	1	1	12	0	3183		Donor2	0
chr3q28	1	1	1	3	0	3183		Donor2	0
chr3q29	1	1	1	15	0	3183		Donor2	0
chr4p11	1	1	1	3	0	3183		Donor2	0
chr4p12	1	1	1	2	0	3183		Donor2	0
chr4p13	1	1	1	1	0	3183		Donor2	0
chr4p14	1	1	1	14	0	3183		Donor2	0
chr4p15	1	1	1	10	0	3183		Donor2	0
chr4p16	1	1	1	24	0	3183		Donor2	0
chr4q12	1	1	1	5	0	3183		Donor2	0
chr4q22	1	1	1	15	0	3183		Donor2	0
chr4q24	1	1	1	7	0	3183		Donor2	0
chr4q25	1	1	1	4	0	3183		Donor2	0
chr4q26	1	1	1	3	0	3183		Donor2	0
chr4q27	1	1	1	1	0	3183		Donor2	0
chr4q31	1	1	1	15	0	3183		Donor2	0
chr4q32	1	1	1	10	0	3183		Donor2	0
chr4q33	1	1	1	2	0	3183		Donor2	0
chr4q35	1	1	1	6	0	3183		Donor2	0
chr5p12	1	1	1	2	0	3183		Donor2	0
chr5p13	1	1	1	9	0	3183		Donor2	0
chr5p14	1	1	1	0	0	3183		Donor2	0
chr5p15	1	1	1	14	0	3183		Donor2	0
chr5q11	1	1	1	10	0	3183		Donor2	0
chr5q12	1	1	1	7	0	3183		Donor2	0
chr5q13	1	1	1	9	0	3183		Donor2	0
chr5q14	1	1	1	19	0	3183		Donor2	0
chr5q15	1	1	1	8	0	3183		Donor2	0
chr5q22	1	1	1	4	0	3183		Donor2	0
chr5q23	1	1	1	11	0	3183		Donor2	0
chr5q31	1	1	1	18	0	3183		Donor2	0
chr5q33	1	1	1	9	0	3183		Donor2	0
chr5q34	1	1	1	0	0	3183		Donor2	0
chr5q35	1	1	1	25	0	3183		Donor2	0
chr6p11	1	1	1	1	0	3183		Donor2	0
chr6p21	1	1	1	26	0	3183		Donor2	0
chr6p22	1	1	1	15	0	3183		Donor2	0
chr6p23	1	1	1	1	0	3183		Donor2	0
chr6p24	1	1	1	4	0	3183		Donor2	0
chr6p25	1	1	1	12	0	3183		Donor2	0
chr6q11	1	1	1	0	0	3183		Donor2	0
chr6q12	1	1	1	2	0	3183		Donor2	0
chr6q13	1	1	1	4	0	3183		Donor2	0
chr6q14	1	1	1	9	0	3183		Donor2	0
chr6q15	1	1	1	5	0	3183		Donor2	0
chr6q16	1	1	1	6	0	3183		Donor2	0
chr6q21	1	1	1	12	0	3183		Donor2	0
chr6q22	1	1	1	6	0	3183		Donor2	0
chr6q23	1	1	1	8	0	3183		Donor2	0
chr6q24	1	1	1	11	0	3183		Donor2	0
chr6q25	1	1	1	17	0	3183		Donor2	0
chr6q26	1	1	1	3	0	3183		Donor2	0
chr6q27	1	1	1	4	0	3183		Donor2	0
chr7p11	1	1	1	2	0	3183		Donor2	0
chr7p12	1	1	1	2	0	3183		Donor2	0
chr7p13	1	1	1	5	0	3183		Donor2	0
chr7p14	1	1	1	11	0	3183		Donor2	0
chr7p15	1	1	1	9	0	3183		Donor2	0
chr7p21	1	1	1	6	0	3183		Donor2	0
chr7p22	1	1	1	18	0	3183		Donor2	0
chr7q11	1	1	1	23	0	3183		Donor2	0
chr7q21	1	1	1	12	0	3183		Donor2	0
chr7q22	1	1	1	13	0	3183		Donor2	0
chr7q31	1	1	1	12	0	3183		Donor2	0
chr7q32	1	1	1	7	0	3183		Donor2	0
chr7q33	1	1	1	5	0	3183		Donor2	0
chr7q34	1	1	1	7	0	3183		Donor2	0
chr7q35	1	1	1	2	0	3183		Donor2	0
chr7q36	1	1	1	12	0	3183		Donor2	0
chr8p11	1	1	1	9	0	3183		Donor2	0
chr8p12	1	1	1	4	0	3183		Donor2	0
chr8p21	1	1	1	18	0	3183		Donor2	0
chr8p22	1	1	1	6	0	3183		Donor2	0
chr8p23	1	1	1	7	0	3183		Donor2	0
chr8q11	1	1	1	8	0	3183		Donor2	0
chr8q12	1	1	1	6	0	3183		Donor2	0
chr8q13	1	1	1	6	0	3183		Donor2	0
chr8q21	1	1	1	7	0	3183		Donor2	0
chr8q22	1	1	1	12	0	3183		Donor2	0
chr8q23	1	1	1	3	0	3183		Donor2	0
chr8q24	1	1	1	24	0	3183		Donor2	0
chr9p11	1	1	1	0	0	3183		Donor2	0
chr9p12	1	1	1	0	0	3183		Donor2	0
chr9p13	1	1	1	10	0	3183		Donor2	0
chr9p23	1	1	1	1	0	3183		Donor2	0
chr9p24	1	1	1	13	0	3183		Donor2	0
chr9q12	1	1	1	0	0	3183		Donor2	0
chr9q13	1	1	1	0	0	3183		Donor2	0
chr9q21	1	1	1	17	0	3183		Donor2	0
chr9q22	1	1	1	15	0	3183		Donor2	0
chr9q31	1	1	1	8	0	3183		Donor2	0
chr9q32	1	1	1	6	0	3183		Donor2	0
chr9q33	1	1	1	18	0	3183		Donor2	0
chr9q34	1	1	1	22	0	3183		Donor2	0
chr10p12	1	1	1	14	0	3183		Donor2	0
chr10p13	1	1	1	3	0	3183		Donor2	0
chr10p14	1	1	1	7	0	3183		Donor2	0
chr10p15	1	1	1	9	0	3183		Donor2	0
chr10q11	1	1	1	11	0	3183		Donor2	0
chr10q21	1	1	1	5	0	3183		Donor2	0
chr10q22	1	1	1	28	0	3183		Donor2	0
chr10q23	1	1	1	21	0	3183		Donor2	0
chr10q24	1	1	1	20	0	3183		Donor2	0
chr10q25	1	1	1	7	0	3183		Donor2	0
chr10q26	1	1	1	18	0	3183		Donor2	0
chr11p11	1	1	1	14	0	3183		Donor2	0
chr11p12	1	1	1	1	0	3183		Donor2	0
chr11p14	1	1	1	1	0	3183		Donor2	0
chr11q12	1	1	1	5	0	3183		Donor2	0
chr11q13	1	1	1	36	0	3183		Donor2	0
chr11q14	1	1	1	11	0	3183		Donor2	0
chr11q22	1	1	1	8	0	3183		Donor2	0
chr11q23	1	1	1	13	0	3183		Donor2	0
chr11q24	1	1	1	7	0	3183		Donor2	0
chr11q25	1	1	1	1	0	3183		Donor2	0
chr12p11	1	1	1	9	0	3183		Donor2	0
chr12p12	1	1	1	12	0	3183		Donor2	0
chr12p13	1	1	1	25	0	3183		Donor2	0
chr12q12	1	1	1	9	0	3183		Donor2	0
chr12q13	1	1	1	25	0	3183		Donor2	0
chr12q14	1	1	1	8	0	3183		Donor2	0
chr12q15	1	1	1	6	0	3183		Donor2	0
chr12q21	1	1	1	9	0	3183		Donor2	0
chr12q22	1	1	1	7	0	3183		Donor2	0
chr12q23	1	1	1	14	0	3183		Donor2	0
chr12q24	1	1	1	44	0	3183		Donor2	0
chr13q11	1	1	1	0	0	3183		Donor2	0
chr13q12	1	1	1	14	0	3183		Donor2	0
chr13q13	1	1	1	5	0	3183		Donor2	0
chr13q14	1	1	1	24	0	3183		Donor2	0
chr13q22	1	1	1	4	0	3183		Donor2	0
chr13q31	1	1	1	2	0	3183		Donor2	0
chr13q32	1	1	1	10	0	3183		Donor2	0
chr13q33	1	1	1	3	0	3183		Donor2	0
chr14q11	1	1	1	6	0	3183		Donor2	0
chr14q12	1	1	1	5	0	3183		Donor2	0
chr14q13	1	1	1	6	0	3183		Donor2	0
chr14q21	1	1	1	6	0	3183		Donor2	0
chr14q22	1	1	1	9	0	3183		Donor2	0
chr14q23	1	1	1	12	0	3183		Donor2	0
chr14q24	1	1	1	20	0	3183		Donor2	0
chr14q31	1	1	1	4	0	3183		Donor2	0
chr14q32	1	1	1	29	0	3183		Donor2	0
chr15q11	1	1	1	3	0	3183		Donor2	0
chr15q12	1	1	1	0	0	3183		Donor2	0
chr15q13	1	1	1	7	0	3183		Donor2	0
chr15q14	1	1	1	6	0	3183		Donor2	0
chr15q15	1	1	1	17	0	3183		Donor2	0
chr15q21	1	1	1	19	0	3183		Donor2	0
chr15q22	1	1	1	19	0	3183		Donor2	0
chr15q23	1	1	1	7	0	3183		Donor2	0
chr15q24	1	1	1	15	0	3183		Donor2	0
chr15q25	1	1	1	12	0	3183		Donor2	0
chr15q26	1	1	1	8	0	3183		Donor2	0
chr16p11	1	1	1	7	0	3183		Donor2	0
chr16p12	1	1	1	17	0	3183		Donor2	0
chr16p13	1	1	1	30	0	3183		Donor2	0
chr16q11	1	1	1	1	0	3183		Donor2	0
chr16q12	1	1	1	12	0	3183		Donor2	0
chr16q13	1	1	1	4	0	3183		Donor2	0
chr16q21	1	1	1	3	0	3183		Donor2	0
chr16q22	1	1	1	17	0	3183		Donor2	0
chr16q23	1	1	1	9	0	3183		Donor2	0
chr16q24	1	1	1	18	0	3183		Donor2	0
chr17p11	1	1	1	11	0	3183		Donor2	0
chr17p12	1	1	1	1	0	3183		Donor2	0
chr17p13	1	1	1	28	0	3183		Donor2	0
chr17q11	1	1	1	25	0	3183		Donor2	0
chr17q12	1	1	1	10	0	3183		Donor2	0
chr17q21	1	1	1	26	0	3183		Donor2	0
chr17q22	1	1	1	2	0	3183		Donor2	0
chr17q23	1	1	1	15	0	3183		Donor2	0
chr17q24	1	1	1	9	0	3183		Donor2	0
chr17q25	1	1	1	33	0	3183		Donor2	0
chr18p11	1	1	1	18	0	3183		Donor2	0
chr18q11	1	1	1	9	0	3183		Donor2	0
chr18q12	1	1	1	10	0	3183		Donor2	0
chr18q21	1	1	1	16	0	3183		Donor2	0
chr18q22	1	1	1	5	0	3183		Donor2	0
chr18q23	1	1	1	4	0	3183		Donor2	0
chr19p12	1	1	1	5	0	3183		Donor2	0
chr19p13	1	1	1	67	0	3183		Donor2	0
chr19q13	1	1	1	49	0	3183		Donor2	0
chr20p11	1	1	1	8	0	3183		Donor2	0
chr20p12	1	1	1	11	0	3183		Donor2	0
chr20p13	1	1	1	11	0	3183		Donor2	0
chr20q11	1	1	1	25	0	3183		Donor2	0
chr20q12	1	1	1	3	0	3183		Donor2	0
chr20q13	1	1	1	30	0	3183		Donor2	0
chr21p11	1	1	1	0	0	3183		Donor2	0
chr21p12	1	1	1	0	0	3183		Donor2	0
chr21q11	1	1	1	1	0	3183		Donor2	0
chr21q21	1	1	1	8	0	3183		Donor2	0
chr21q22	1	1	1	32	0	3183		Donor2	0
chr22q11	1	1	1	14	0	3183		Donor2	0
chr22q12	1	1	1	18	0	3183		Donor2	0
chr22q13	1	1	1	33	0	3183		Donor2	0
PAR1	1	1	1	4	0	3183		Donor2	0
chrXp11	1	1	1	13	0	3183		Donor2	0
chrXp21	1	1	1	1	0	3183		Donor2	0
chrXp22	1	1	1	14	0	3183		Donor2	0
chrXq11	1	1	1	0	0	3183		Donor2	0
chrXq12	1	1	1	3	0	3183		Donor2	0
chrXq13	1	1	1	8	0	3183		Donor2	0
chrXq21	1	1	1	6	0	3183		Donor2	0
chrXq22	1	1	1	3	0	3183		Donor2	0
chrXq23	1	1	1	4	0	3183		Donor2	0
chrXq24	1	1	1	4	0	3183		Donor2	0
chrXq25	1	1	1	3	0	3183		Donor2	0
chrXq26	1	1	1	6	0	3183		Donor2	0
chrXq27	1	1	1	1	0	3183		Donor2	0
chrXq28	1	1	1	6	0	3183		Donor2	0
PAR2	1	1	1	0	0	3183		Donor2	0
chrYp11	1	1	1	1	0	3183		Donor2	0
chrYq11	1	1	1	5	0	3183		Donor2	0
MT	1	1	1	9	0	3183		Donor2	0
chr17q12	0.0068	1	2	10	1	2945	AP2B1	Donor6	0
chr2p21	0.0075	1	2	11	1	2945	PRKCE	Donor6	0
chr1p12	1	1	2	2	0	2945		Donor6	0
chr1p13	1	1	2	19	0	2945		Donor6	0
chr1p21	1	1	2	5	0	2945		Donor6	0
chr1p22	1	1	2	12	0	2945		Donor6	0
chr1p31	1	1	2	10	0	2945		Donor6	0
chr1p32	1	1	2	10	0	2945		Donor6	0
chr1p33	1	1	2	4	0	2945		Donor6	0
chr1p34	1	1	2	25	0	2945		Donor6	0
chr1p35	1	1	2	18	0	2945		Donor6	0
chr1p36	1	1	2	50	0	2945		Donor6	0
chr1q21	1	1	2	20	0	2945		Donor6	0
chr1q22	1	1	2	6	0	2945		Donor6	0
chr1q23	1	1	2	8	0	2945		Donor6	0
chr1q24	1	1	2	9	0	2945		Donor6	0
chr1q25	1	1	2	18	0	2945		Donor6	0
chr1q31	1	1	2	6	0	2945		Donor6	0
chr1q32	1	1	2	19	0	2945		Donor6	0
chr1q41	1	1	2	5	0	2945		Donor6	0
chr1q42	1	1	2	15	0	2945		Donor6	0
chr1q43	1	1	2	4	0	2945		Donor6	0
chr2p11	1	1	2	7	0	2945		Donor6	0
chr2p12	1	1	2	2	0	2945		Donor6	0
chr2p13	1	1	2	11	0	2945		Donor6	0
chr2p14	1	1	2	8	0	2945		Donor6	0
chr2p15	1	1	2	5	0	2945		Donor6	0
chr2p16	1	1	2	11	0	2945		Donor6	0
chr2p22	1	1	2	13	0	2945		Donor6	0
chr2p23	1	1	2	14	0	2945		Donor6	0
chr2p24	1	1	2	3	0	2945		Donor6	0
chr2p25	1	1	2	7	0	2945		Donor6	0
chr2q11	1	1	2	11	0	2945		Donor6	0
chr2q12	1	1	2	3	0	2945		Donor6	0
chr2q13	1	1	2	4	0	2945		Donor6	0
chr2q14	1	1	2	13	0	2945		Donor6	0
chr2q21	1	1	2	10	0	2945		Donor6	0
chr2q22	1	1	2	6	0	2945		Donor6	0
chr2q23	1	1	2	7	0	2945		Donor6	0
chr2q24	1	1	2	8	0	2945		Donor6	0
chr2q31	1	1	2	12	0	2945		Donor6	0
chr2q32	1	1	2	6	0	2945		Donor6	0
chr2q33	1	1	2	20	0	2945		Donor6	0
chr2q34	1	1	2	4	0	2945		Donor6	0
chr2q35	1	1	2	7	0	2945		Donor6	0
chr2q36	1	1	2	7	0	2945		Donor6	0
chr3p11	1	1	2	1	0	2945		Donor6	0
chr3p12	1	1	2	2	0	2945		Donor6	0
chr3p13	1	1	2	4	0	2945		Donor6	0
chr3p14	1	1	2	12	0	2945		Donor6	0
chr3p21	1	1	2	30	0	2945		Donor6	0
chr3p22	1	1	2	15	0	2945		Donor6	0
chr3p23	1	1	2	1	0	2945		Donor6	0
chr3p24	1	1	2	13	0	2945		Donor6	0
chr3p25	1	1	2	12	0	2945		Donor6	0
chr3p26	1	1	2	5	0	2945		Donor6	0
chr3q11	1	1	2	3	0	2945		Donor6	0
chr3q12	1	1	2	5	0	2945		Donor6	0
chr3q13	1	1	2	13	0	2945		Donor6	0
chr3q21	1	1	2	15	0	2945		Donor6	0
chr3q22	1	1	2	10	0	2945		Donor6	0
chr3q23	1	1	2	7	0	2945		Donor6	0
chr3q25	1	1	2	10	0	2945		Donor6	0
chr3q26	1	1	2	15	0	2945		Donor6	0
chr3q27	1	1	2	13	0	2945		Donor6	0
chr3q28	1	1	2	3	0	2945		Donor6	0
chr3q29	1	1	2	17	0	2945		Donor6	0
chr4p11	1	1	2	2	0	2945		Donor6	0
chr4p12	1	1	2	0	0	2945		Donor6	0
chr4p13	1	1	2	1	0	2945		Donor6	0
chr4p14	1	1	2	12	0	2945		Donor6	0
chr4p15	1	1	2	10	0	2945		Donor6	0
chr4p16	1	1	2	20	0	2945		Donor6	0
chr4q12	1	1	2	5	0	2945		Donor6	0
chr4q22	1	1	2	8	0	2945		Donor6	0
chr4q24	1	1	2	7	0	2945		Donor6	0
chr4q25	1	1	2	3	0	2945		Donor6	0
chr4q26	1	1	2	3	0	2945		Donor6	0
chr4q27	1	1	2	1	0	2945		Donor6	0
chr4q31	1	1	2	16	0	2945		Donor6	0
chr4q32	1	1	2	5	0	2945		Donor6	0
chr4q33	1	1	2	1	0	2945		Donor6	0
chr4q35	1	1	2	5	0	2945		Donor6	0
chr5p12	1	1	2	1	0	2945		Donor6	0
chr5p13	1	1	2	8	0	2945		Donor6	0
chr5p14	1	1	2	0	0	2945		Donor6	0
chr5p15	1	1	2	13	0	2945		Donor6	0
chr5q11	1	1	2	9	0	2945		Donor6	0
chr5q12	1	1	2	6	0	2945		Donor6	0
chr5q13	1	1	2	8	0	2945		Donor6	0
chr5q14	1	1	2	18	0	2945		Donor6	0
chr5q15	1	1	2	6	0	2945		Donor6	0
chr5q21	1	1	2	7	0	2945		Donor6	0
chr5q22	1	1	2	3	0	2945		Donor6	0
chr5q23	1	1	2	5	0	2945		Donor6	0
chr5q31	1	1	2	19	0	2945		Donor6	0
chr5q33	1	1	2	8	0	2945		Donor6	0
chr5q34	1	1	2	0	0	2945		Donor6	0
chr5q35	1	1	2	24	0	2945		Donor6	0
chr6p11	1	1	2	1	0	2945		Donor6	0
chr6p21	1	1	2	29	0	2945		Donor6	0
chr6p22	1	1	2	13	0	2945		Donor6	0
chr6p23	1	1	2	2	0	2945		Donor6	0
chr6p24	1	1	2	5	0	2945		Donor6	0
chr6p25	1	1	2	13	0	2945		Donor6	0
chr6q11	1	1	2	0	0	2945		Donor6	0
chr6q12	1	1	2	2	0	2945		Donor6	0
chr6q13	1	1	2	4	0	2945		Donor6	0
chr6q14	1	1	2	7	0	2945		Donor6	0
chr6q15	1	1	2	5	0	2945		Donor6	0
chr6q16	1	1	2	3	0	2945		Donor6	0
chr6q21	1	1	2	11	0	2945		Donor6	0
chr6q22	1	1	2	6	0	2945		Donor6	0
chr6q23	1	1	2	9	0	2945		Donor6	0
chr6q24	1	1	2	11	0	2945		Donor6	0
chr6q25	1	1	2	18	0	2945		Donor6	0
chr6q26	1	1	2	3	0	2945		Donor6	0
chr6q27	1	1	2	3	0	2945		Donor6	0
chr7p11	1	1	2	2	0	2945		Donor6	0
chr7p12	1	1	2	2	0	2945		Donor6	0
chr7p13	1	1	2	5	0	2945		Donor6	0
chr7p14	1	1	2	11	0	2945		Donor6	0
chr7p15	1	1	2	7	0	2945		Donor6	0
chr7p21	1	1	2	8	0	2945		Donor6	0
chr7p22	1	1	2	16	0	2945		Donor6	0
chr7q11	1	1	2	20	0	2945		Donor6	0
chr7q21	1	1	2	9	0	2945		Donor6	0
chr7q22	1	1	2	17	0	2945		Donor6	0
chr7q31	1	1	2	11	0	2945		Donor6	0
chr7q32	1	1	2	6	0	2945		Donor6	0
chr7q33	1	1	2	5	0	2945		Donor6	0
chr7q34	1	1	2	7	0	2945		Donor6	0
chr7q35	1	1	2	1	0	2945		Donor6	0
chr7q36	1	1	2	11	0	2945		Donor6	0
chr8p11	1	1	2	10	0	2945		Donor6	0
chr8p12	1	1	2	5	0	2945		Donor6	0
chr8p21	1	1	2	17	0	2945		Donor6	0
chr8p22	1	1	2	6	0	2945		Donor6	0
chr8p23	1	1	2	10	0	2945		Donor6	0
chr8q11	1	1	2	7	0	2945		Donor6	0
chr8q12	1	1	2	10	0	2945		Donor6	0
chr8q13	1	1	2	4	0	2945		Donor6	0
chr8q21	1	1	2	5	0	2945		Donor6	0
chr8q22	1	1	2	12	0	2945		Donor6	0
chr8q23	1	1	2	3	0	2945		Donor6	0
chr8q24	1	1	2	24	0	2945		Donor6	0
chr9p11	1	1	2	0	0	2945		Donor6	0
chr9p12	1	1	2	0	0	2945		Donor6	0
chr9p13	1	1	2	9	0	2945		Donor6	0
chr9p23	1	1	2	0	0	2945		Donor6	0
chr9p24	1	1	2	12	0	2945		Donor6	0
chr9q12	1	1	2	0	0	2945		Donor6	0
chr9q13	1	1	2	0	0	2945		Donor6	0
chr9q21	1	1	2	17	0	2945		Donor6	0
chr9q22	1	1	2	14	0	2945		Donor6	0
chr9q31	1	1	2	8	0	2945		Donor6	0
chr9q32	1	1	2	6	0	2945		Donor6	0
chr9q33	1	1	2	16	0	2945		Donor6	0
chr9q34	1	1	2	19	0	2945		Donor6	0
chr10p12	1	1	2	10	0	2945		Donor6	0
chr10p13	1	1	2	3	0	2945		Donor6	0
chr10p14	1	1	2	5	0	2945		Donor6	0
chr10p15	1	1	2	10	0	2945		Donor6	0
chr10q11	1	1	2	9	0	2945		Donor6	0
chr10q21	1	1	2	7	0	2945		Donor6	0
chr10q22	1	1	2	28	0	2945		Donor6	0
chr10q23	1	1	2	17	0	2945		Donor6	0
chr10q24	1	1	2	22	0	2945		Donor6	0
chr10q25	1	1	2	6	0	2945		Donor6	0
chr10q26	1	1	2	14	0	2945		Donor6	0
chr11p11	1	1	2	12	0	2945		Donor6	0
chr11p12	1	1	2	1	0	2945		Donor6	0
chr11p14	1	1	2	1	0	2945		Donor6	0
chr11q12	1	1	2	6	0	2945		Donor6	0
chr11q13	1	1	2	26	0	2945		Donor6	0
chr11q14	1	1	2	8	0	2945		Donor6	0
chr11q22	1	1	2	5	0	2945		Donor6	0
chr11q23	1	1	2	11	0	2945		Donor6	0
chr11q24	1	1	2	6	0	2945		Donor6	0
chr11q25	1	1	2	2	0	2945		Donor6	0
chr12p11	1	1	2	10	0	2945		Donor6	0
chr12p12	1	1	2	10	0	2945		Donor6	0
chr12p13	1	1	2	21	0	2945		Donor6	0
chr12q12	1	1	2	8	0	2945		Donor6	0
chr12q13	1	1	2	23	0	2945		Donor6	0
chr12q14	1	1	2	7	0	2945		Donor6	0
chr12q15	1	1	2	6	0	2945		Donor6	0
chr12q21	1	1	2	9	0	2945		Donor6	0
chr12q22	1	1	2	6	0	2945		Donor6	0
chr12q23	1	1	2	16	0	2945		Donor6	0
chr12q24	1	1	2	39	0	2945		Donor6	0
chr13q11	1	1	2	0	0	2945		Donor6	0
chr13q12	1	1	2	18	0	2945		Donor6	0
chr13q13	1	1	2	5	0	2945		Donor6	0
chr13q14	1	1	2	19	0	2945		Donor6	0
chr13q22	1	1	2	2	0	2945		Donor6	0
chr13q31	1	1	2	2	0	2945		Donor6	0
chr13q32	1	1	2	10	0	2945		Donor6	0
chr13q33	1	1	2	2	0	2945		Donor6	0
chr14q11	1	1	2	5	0	2945		Donor6	0
chr14q12	1	1	2	5	0	2945		Donor6	0
chr14q13	1	1	2	5	0	2945		Donor6	0
chr14q21	1	1	2	7	0	2945		Donor6	0
chr14q22	1	1	2	8	0	2945		Donor6	0
chr14q23	1	1	2	13	0	2945		Donor6	0
chr14q24	1	1	2	21	0	2945		Donor6	0
chr14q31	1	1	2	2	0	2945		Donor6	0
chr14q32	1	1	2	33	0	2945		Donor6	0
chr15q11	1	1	2	2	0	2945		Donor6	0
chr15q12	1	1	2	0	0	2945		Donor6	0
chr15q13	1	1	2	5	0	2945		Donor6	0
chr15q14	1	1	2	5	0	2945		Donor6	0
chr15q15	1	1	2	12	0	2945		Donor6	0
chr15q21	1	1	2	20	0	2945		Donor6	0
chr15q22	1	1	2	18	0	2945		Donor6	0
chr15q23	1	1	2	5	0	2945		Donor6	0
chr15q24	1	1	2	9	0	2945		Donor6	0
chr15q25	1	1	2	12	0	2945		Donor6	0
chr15q26	1	1	2	9	0	2945		Donor6	0
chr16p11	1	1	2	7	0	2945		Donor6	0
chr16p12	1	1	2	13	0	2945		Donor6	0
chr16p13	1	1	2	26	0	2945		Donor6	0
chr16q11	1	1	2	1	0	2945		Donor6	0
chr16q12	1	1	2	14	0	2945		Donor6	0
chr16q13	1	1	2	2	0	2945		Donor6	0
chr16q21	1	1	2	3	0	2945		Donor6	0
chr16q22	1	1	2	11	0	2945		Donor6	0
chr16q23	1	1	2	8	0	2945		Donor6	0
chr16q24	1	1	2	16	0	2945		Donor6	0
chr17p11	1	1	2	11	0	2945		Donor6	0
chr17p12	1	1	2	1	0	2945		Donor6	0
chr17p13	1	1	2	30	0	2945		Donor6	0
chr17q11	1	1	2	20	0	2945		Donor6	0
chr17q21	1	1	2	24	0	2945		Donor6	0
chr17q22	1	1	2	3	0	2945		Donor6	0
chr17q23	1	1	2	15	0	2945		Donor6	0
chr17q24	1	1	2	9	0	2945		Donor6	0
chr17q25	1	1	2	28	0	2945		Donor6	0
chr18p11	1	1	2	18	0	2945		Donor6	0
chr18q11	1	1	2	8	0	2945		Donor6	0
chr18q12	1	1	2	10	0	2945		Donor6	0
chr18q21	1	1	2	17	0	2945		Donor6	0
chr18q22	1	1	2	5	0	2945		Donor6	0
chr18q23	1	1	2	6	0	2945		Donor6	0
chr19p12	1	1	2	5	0	2945		Donor6	0
chr19p13	1	1	2	63	0	2945		Donor6	0
chr19q13	1	1	2	44	0	2945		Donor6	0
chr20p11	1	1	2	7	0	2945		Donor6	0
chr20p12	1	1	2	8	0	2945		Donor6	0
chr20p13	1	1	2	11	0	2945		Donor6	0
chr20q11	1	1	2	23	0	2945		Donor6	0
chr20q12	1	1	2	3	0	2945		Donor6	0
chr20q13	1	1	2	27	0	2945		Donor6	0
chr21p11	1	1	2	0	0	2945		Donor6	0
chr21p12	1	1	2	0	0	2945		Donor6	0
chr21q11	1	1	2	1	0	2945		Donor6	0
chr21q21	1	1	2	6	0	2945		Donor6	0
chr21q22	1	1	2	32	0	2945		Donor6	0
chr22q11	1	1	2	9	0	2945		Donor6	0
chr22q12	1	1	2	17	0	2945		Donor6	0
chr22q13	1	1	2	31	0	2945		Donor6	0
PAR1	1	1	2	3	0	2945		Donor6	0
chrXp11	1	1	2	12	0	2945		Donor6	0
chrXp21	1	1	2	1	0	2945		Donor6	0
chrXp22	1	1	2	17	0	2945		Donor6	0
chrXq11	1	1	2	0	0	2945		Donor6	0
chrXq12	1	1	2	2	0	2945		Donor6	0
chrXq13	1	1	2	7	0	2945		Donor6	0
chrXq21	1	1	2	6	0	2945		Donor6	0
chrXq22	1	1	2	3	0	2945		Donor6	0
chrXq23	1	1	2	4	0	2945		Donor6	0
chrXq24	1	1	2	3	0	2945		Donor6	0
chrXq25	1	1	2	3	0	2945		Donor6	0
chrXq26	1	1	2	5	0	2945		Donor6	0
chrXq27	1	1	2	1	0	2945		Donor6	0
chrXq28	1	1	2	6	0	2945		Donor6	0
PAR2	1	1	2	0	0	2945		Donor6	0
chrYp11	1	1	2	1	0	2945		Donor6	0
chrYq11	1	1	2	4	0	2945		Donor6	0
MT	1	1	2	9	0	2945		Donor6	0
chr5q14	0.013	1	2	18	1	2797	AP3B1	Donor4	0
chr8q24	0.016	1	2	22	1	2797	ASAP1	Donor4	0
chr1p12	1	1	2	3	0	2797		Donor4	0
chr1p13	1	1	2	21	0	2797		Donor4	0
chr1p21	1	1	2	4	0	2797		Donor4	0
chr1p22	1	1	2	9	0	2797		Donor4	0
chr1p31	1	1	2	16	0	2797		Donor4	0
chr1p32	1	1	2	12	0	2797		Donor4	0
chr1p33	1	1	2	4	0	2797		Donor4	0
chr1p34	1	1	2	22	0	2797		Donor4	0
chr1p35	1	1	2	14	0	2797		Donor4	0
chr1p36	1	1	2	46	0	2797		Donor4	0
chr1q21	1	1	2	20	0	2797		Donor4	0
chr1q22	1	1	2	5	0	2797		Donor4	0
chr1q23	1	1	2	6	0	2797		Donor4	0
chr1q24	1	1	2	9	0	2797		Donor4	0
chr1q25	1	1	2	18	0	2797		Donor4	0
chr1q31	1	1	2	5	0	2797		Donor4	0
chr1q32	1	1	2	17	0	2797		Donor4	0
chr1q41	1	1	2	7	0	2797		Donor4	0
chr1q42	1	1	2	14	0	2797		Donor4	0
chr1q43	1	1	2	3	0	2797		Donor4	0
chr2p11	1	1	2	5	0	2797		Donor4	0
chr2p12	1	1	2	2	0	2797		Donor4	0
chr2p13	1	1	2	10	0	2797		Donor4	0
chr2p14	1	1	2	8	0	2797		Donor4	0
chr2p15	1	1	2	6	0	2797		Donor4	0
chr2p16	1	1	2	11	0	2797		Donor4	0
chr2p21	1	1	2	11	0	2797		Donor4	0
chr2p22	1	1	2	15	0	2797		Donor4	0
chr2p23	1	1	2	14	0	2797		Donor4	0
chr2p24	1	1	2	2	0	2797		Donor4	0
chr2p25	1	1	2	5	0	2797		Donor4	0
chr2q11	1	1	2	8	0	2797		Donor4	0
chr2q12	1	1	2	3	0	2797		Donor4	0
chr2q13	1	1	2	4	0	2797		Donor4	0
chr2q14	1	1	2	15	0	2797		Donor4	0
chr2q21	1	1	2	9	0	2797		Donor4	0
chr2q22	1	1	2	7	0	2797		Donor4	0
chr2q23	1	1	2	8	0	2797		Donor4	0
chr2q24	1	1	2	6	0	2797		Donor4	0
chr2q31	1	1	2	16	0	2797		Donor4	0
chr2q32	1	1	2	8	0	2797		Donor4	0
chr2q33	1	1	2	21	0	2797		Donor4	0
chr2q34	1	1	2	3	0	2797		Donor4	0
chr2q35	1	1	2	5	0	2797		Donor4	0
chr2q36	1	1	2	9	0	2797		Donor4	0
chr3p11	1	1	2	1	0	2797		Donor4	0
chr3p12	1	1	2	2	0	2797		Donor4	0
chr3p13	1	1	2	4	0	2797		Donor4	0
chr3p14	1	1	2	12	0	2797		Donor4	0
chr3p21	1	1	2	24	0	2797		Donor4	0
chr3p22	1	1	2	15	0	2797		Donor4	0
chr3p23	1	1	2	1	0	2797		Donor4	0
chr3p24	1	1	2	11	0	2797		Donor4	0
chr3p25	1	1	2	12	0	2797		Donor4	0
chr3p26	1	1	2	4	0	2797		Donor4	0
chr3q11	1	1	2	1	0	2797		Donor4	0
chr3q12	1	1	2	3	0	2797		Donor4	0
chr3q13	1	1	2	14	0	2797		Donor4	0
chr3q21	1	1	2	13	0	2797		Donor4	0
chr3q22	1	1	2	12	0	2797		Donor4	0
chr3q23	1	1	2	6	0	2797		Donor4	0
chr3q25	1	1	2	12	0	2797		Donor4	0
chr3q26	1	1	2	15	0	2797		Donor4	0
chr3q27	1	1	2	12	0	2797		Donor4	0
chr3q28	1	1	2	3	0	2797		Donor4	0
chr3q29	1	1	2	12	0	2797		Donor4	0
chr4p11	1	1	2	3	0	2797		Donor4	0
chr4p12	1	1	2	1	0	2797		Donor4	0
chr4p13	1	1	2	1	0	2797		Donor4	0
chr4p14	1	1	2	11	0	2797		Donor4	0
chr4p15	1	1	2	9	0	2797		Donor4	0
chr4p16	1	1	2	18	0	2797		Donor4	0
chr4q12	1	1	2	5	0	2797		Donor4	0
chr4q22	1	1	2	14	0	2797		Donor4	0
chr4q24	1	1	2	7	0	2797		Donor4	0
chr4q25	1	1	2	3	0	2797		Donor4	0
chr4q26	1	1	2	3	0	2797		Donor4	0
chr4q27	1	1	2	1	0	2797		Donor4	0
chr4q31	1	1	2	16	0	2797		Donor4	0
chr4q32	1	1	2	7	0	2797		Donor4	0
chr4q33	1	1	2	3	0	2797		Donor4	0
chr4q35	1	1	2	4	0	2797		Donor4	0
chr5p12	1	1	2	2	0	2797		Donor4	0
chr5p13	1	1	2	8	0	2797		Donor4	0
chr5p14	1	1	2	0	0	2797		Donor4	0
chr5p15	1	1	2	10	0	2797		Donor4	0
chr5q11	1	1	2	10	0	2797		Donor4	0
chr5q12	1	1	2	6	0	2797		Donor4	0
chr5q13	1	1	2	8	0	2797		Donor4	0
chr5q15	1	1	2	7	0	2797		Donor4	0
chr5q21	1	1	2	7	0	2797		Donor4	0
chr5q22	1	1	2	4	0	2797		Donor4	0
chr5q23	1	1	2	9	0	2797		Donor4	0
chr5q31	1	1	2	14	0	2797		Donor4	0
chr5q33	1	1	2	10	0	2797		Donor4	0
chr5q34	1	1	2	0	0	2797		Donor4	0
chr5q35	1	1	2	21	0	2797		Donor4	0
chr6p11	1	1	2	1	0	2797		Donor4	0
chr6p21	1	1	2	23	0	2797		Donor4	0
chr6p22	1	1	2	13	0	2797		Donor4	0
chr6p23	1	1	2	1	0	2797		Donor4	0
chr6p24	1	1	2	3	0	2797		Donor4	0
chr6p25	1	1	2	13	0	2797		Donor4	0
chr6q11	1	1	2	0	0	2797		Donor4	0
chr6q12	1	1	2	2	0	2797		Donor4	0
chr6q13	1	1	2	4	0	2797		Donor4	0
chr6q14	1	1	2	9	0	2797		Donor4	0
chr6q15	1	1	2	2	0	2797		Donor4	0
chr6q16	1	1	2	4	0	2797		Donor4	0
chr6q21	1	1	2	13	0	2797		Donor4	0
chr6q22	1	1	2	7	0	2797		Donor4	0
chr6q23	1	1	2	8	0	2797		Donor4	0
chr6q24	1	1	2	9	0	2797		Donor4	0
chr6q25	1	1	2	16	0	2797		Donor4	0
chr6q26	1	1	2	3	0	2797		Donor4	0
chr6q27	1	1	2	3	0	2797		Donor4	0
chr7p11	1	1	2	2	0	2797		Donor4	0
chr7p12	1	1	2	2	0	2797		Donor4	0
chr7p13	1	1	2	5	0	2797		Donor4	0
chr7p14	1	1	2	10	0	2797		Donor4	0
chr7p15	1	1	2	9	0	2797		Donor4	0
chr7p21	1	1	2	7	0	2797		Donor4	0
chr7p22	1	1	2	14	0	2797		Donor4	0
chr7q11	1	1	2	16	0	2797		Donor4	0
chr7q21	1	1	2	12	0	2797		Donor4	0
chr7q22	1	1	2	14	0	2797		Donor4	0
chr7q31	1	1	2	12	0	2797		Donor4	0
chr7q32	1	1	2	8	0	2797		Donor4	0
chr7q33	1	1	2	4	0	2797		Donor4	0
chr7q34	1	1	2	6	0	2797		Donor4	0
chr7q35	1	1	2	1	0	2797		Donor4	0
chr7q36	1	1	2	11	0	2797		Donor4	0
chr8p11	1	1	2	10	0	2797		Donor4	0
chr8p12	1	1	2	4	0	2797		Donor4	0
chr8p21	1	1	2	16	0	2797		Donor4	0
chr8p22	1	1	2	6	0	2797		Donor4	0
chr8p23	1	1	2	8	0	2797		Donor4	0
chr8q11	1	1	2	6	0	2797		Donor4	0
chr8q12	1	1	2	7	0	2797		Donor4	0
chr8q13	1	1	2	5	0	2797		Donor4	0
chr8q21	1	1	2	7	0	2797		Donor4	0
chr8q22	1	1	2	10	0	2797		Donor4	0
chr8q23	1	1	2	2	0	2797		Donor4	0
chr9p11	1	1	2	0	0	2797		Donor4	0
chr9p12	1	1	2	0	0	2797		Donor4	0
chr9p13	1	1	2	10	0	2797		Donor4	0
chr9p23	1	1	2	0	0	2797		Donor4	0
chr9p24	1	1	2	12	0	2797		Donor4	0
chr9q12	1	1	2	0	0	2797		Donor4	0
chr9q13	1	1	2	0	0	2797		Donor4	0
chr9q21	1	1	2	13	0	2797		Donor4	0
chr9q22	1	1	2	16	0	2797		Donor4	0
chr9q31	1	1	2	9	0	2797		Donor4	0
chr9q32	1	1	2	5	0	2797		Donor4	0
chr9q33	1	1	2	18	0	2797		Donor4	0
chr9q34	1	1	2	14	0	2797		Donor4	0
chr10p12	1	1	2	12	0	2797		Donor4	0
chr10p13	1	1	2	4	0	2797		Donor4	0
chr10p14	1	1	2	7	0	2797		Donor4	0
chr10p15	1	1	2	7	0	2797		Donor4	0
chr10q11	1	1	2	11	0	2797		Donor4	0
chr10q21	1	1	2	6	0	2797		Donor4	0
chr10q22	1	1	2	20	0	2797		Donor4	0
chr10q23	1	1	2	18	0	2797		Donor4	0
chr10q24	1	1	2	19	0	2797		Donor4	0
chr10q25	1	1	2	6	0	2797		Donor4	0
chr10q26	1	1	2	16	0	2797		Donor4	0
chr11p11	1	1	2	12	0	2797		Donor4	0
chr11p12	1	1	2	1	0	2797		Donor4	0
chr11p14	1	1	2	1	0	2797		Donor4	0
chr11q12	1	1	2	3	0	2797		Donor4	0
chr11q13	1	1	2	32	0	2797		Donor4	0
chr11q14	1	1	2	9	0	2797		Donor4	0
chr11q22	1	1	2	7	0	2797		Donor4	0
chr11q23	1	1	2	11	0	2797		Donor4	0
chr11q24	1	1	2	7	0	2797		Donor4	0
chr11q25	1	1	2	2	0	2797		Donor4	0
chr12p11	1	1	2	10	0	2797		Donor4	0
chr12p12	1	1	2	11	0	2797		Donor4	0
chr12p13	1	1	2	17	0	2797		Donor4	0
chr12q12	1	1	2	8	0	2797		Donor4	0
chr12q13	1	1	2	18	0	2797		Donor4	0
chr12q14	1	1	2	7	0	2797		Donor4	0
chr12q15	1	1	2	6	0	2797		Donor4	0
chr12q21	1	1	2	11	0	2797		Donor4	0
chr12q22	1	1	2	5	0	2797		Donor4	0
chr12q23	1	1	2	14	0	2797		Donor4	0
chr12q24	1	1	2	36	0	2797		Donor4	0
chr13q11	1	1	2	0	0	2797		Donor4	0
chr13q12	1	1	2	12	0	2797		Donor4	0
chr13q13	1	1	2	5	0	2797		Donor4	0
chr13q14	1	1	2	23	0	2797		Donor4	0
chr13q22	1	1	2	3	0	2797		Donor4	0
chr13q31	1	1	2	2	0	2797		Donor4	0
chr13q32	1	1	2	11	0	2797		Donor4	0
chr13q33	1	1	2	3	0	2797		Donor4	0
chr14q11	1	1	2	6	0	2797		Donor4	0
chr14q12	1	1	2	5	0	2797		Donor4	0
chr14q13	1	1	2	5	0	2797		Donor4	0
chr14q21	1	1	2	7	0	2797		Donor4	0
chr14q22	1	1	2	10	0	2797		Donor4	0
chr14q23	1	1	2	13	0	2797		Donor4	0
chr14q24	1	1	2	20	0	2797		Donor4	0
chr14q31	1	1	2	4	0	2797		Donor4	0
chr14q32	1	1	2	32	0	2797		Donor4	0
chr15q11	1	1	2	2	0	2797		Donor4	0
chr15q12	1	1	2	0	0	2797		Donor4	0
chr15q13	1	1	2	6	0	2797		Donor4	0
chr15q14	1	1	2	5	0	2797		Donor4	0
chr15q15	1	1	2	16	0	2797		Donor4	0
chr15q21	1	1	2	21	0	2797		Donor4	0
chr15q22	1	1	2	18	0	2797		Donor4	0
chr15q23	1	1	2	6	0	2797		Donor4	0
chr15q24	1	1	2	13	0	2797		Donor4	0
chr15q25	1	1	2	10	0	2797		Donor4	0
chr15q26	1	1	2	10	0	2797		Donor4	0
chr16p11	1	1	2	5	0	2797		Donor4	0
chr16p12	1	1	2	18	0	2797		Donor4	0
chr16p13	1	1	2	22	0	2797		Donor4	0
chr16q11	1	1	2	0	0	2797		Donor4	0
chr16q12	1	1	2	11	0	2797		Donor4	0
chr16q13	1	1	2	0	0	2797		Donor4	0
chr16q21	1	1	2	2	0	2797		Donor4	0
chr16q22	1	1	2	14	0	2797		Donor4	0
chr16q23	1	1	2	8	0	2797		Donor4	0
chr16q24	1	1	2	12	0	2797		Donor4	0
chr17p11	1	1	2	10	0	2797		Donor4	0
chr17p12	1	1	2	2	0	2797		Donor4	0
chr17p13	1	1	2	26	0	2797		Donor4	0
chr17q11	1	1	2	22	0	2797		Donor4	0
chr17q12	1	1	2	10	0	2797		Donor4	0
chr17q21	1	1	2	22	0	2797		Donor4	0
chr17q22	1	1	2	3	0	2797		Donor4	0
chr17q23	1	1	2	16	0	2797		Donor4	0
chr17q24	1	1	2	9	0	2797		Donor4	0
chr17q25	1	1	2	23	0	2797		Donor4	0
chr18p11	1	1	2	17	0	2797		Donor4	0
chr18q11	1	1	2	8	0	2797		Donor4	0
chr18q12	1	1	2	10	0	2797		Donor4	0
chr18q21	1	1	2	16	0	2797		Donor4	0
chr18q22	1	1	2	4	0	2797		Donor4	0
chr18q23	1	1	2	4	0	2797		Donor4	0
chr19p12	1	1	2	3	0	2797		Donor4	0
chr19p13	1	1	2	35	0	2797		Donor4	0
chr19q13	1	1	2	26	0	2797		Donor4	0
chr20p11	1	1	2	8	0	2797		Donor4	0
chr20p12	1	1	2	10	0	2797		Donor4	0
chr20p13	1	1	2	10	0	2797		Donor4	0
chr20q11	1	1	2	21	0	2797		Donor4	0
chr20q12	1	1	2	3	0	2797		Donor4	0
chr20q13	1	1	2	20	0	2797		Donor4	0
chr21p11	1	1	2	0	0	2797		Donor4	0
chr21p12	1	1	2	0	0	2797		Donor4	0
chr21q11	1	1	2	1	0	2797		Donor4	0
chr21q21	1	1	2	8	0	2797		Donor4	0
chr21q22	1	1	2	28	0	2797		Donor4	0
chr22q11	1	1	2	8	0	2797		Donor4	0
chr22q12	1	1	2	12	0	2797		Donor4	0
chr22q13	1	1	2	20	0	2797		Donor4	0
PAR1	1	1	2	3	0	2797		Donor4	0
chrXp11	1	1	2	10	0	2797		Donor4	0
chrXp21	1	1	2	0	0	2797		Donor4	0
chrXp22	1	1	2	14	0	2797		Donor4	0
chrXq11	1	1	2	1	0	2797		Donor4	0
chrXq12	1	1	2	2	0	2797		Donor4	0
chrXq13	1	1	2	7	0	2797		Donor4	0
chrXq21	1	1	2	6	0	2797		Donor4	0
chrXq22	1	1	2	3	0	2797		Donor4	0
chrXq23	1	1	2	4	0	2797		Donor4	0
chrXq24	1	1	2	3	0	2797		Donor4	0
chrXq25	1	1	2	2	0	2797		Donor4	0
chrXq26	1	1	2	4	0	2797		Donor4	0
chrXq27	1	1	2	1	0	2797		Donor4	0
chrXq28	1	1	2	5	0	2797		Donor4	0
PAR2	1	1	2	0	0	2797		Donor4	0
chrYp11	1	1	2	1	0	2797		Donor4	0
chrYq11	1	1	2	4	0	2797		Donor4	0
MT	1	1	2	7	0	2797		Donor4	0
chr2q11	0.013	1	4	12	1	3665	AFF3	Donor8	0
chr21q22	0.039	1	4	36	1	3665	DSCAM	Donor8	0
chr1p12	1	1	4	3	0	3665		Donor8	0
chr1p13	1	1	4	23	0	3665		Donor8	0
chr1p21	1	1	4	6	0	3665		Donor8	0
chr1p22	1	1	4	14	0	3665		Donor8	0
chr1p31	1	1	4	19	0	3665		Donor8	0
chr1p32	1	1	4	16	0	3665		Donor8	0
chr1p33	1	1	4	5	0	3665		Donor8	0
chr1p34	1	1	4	26	0	3665		Donor8	0
chr1p35	1	1	4	20	0	3665		Donor8	0
chr1p36	1	1	4	60	0	3665		Donor8	0
chr1q21	1	1	4	24	0	3665		Donor8	0
chr1q22	1	1	4	6	0	3665		Donor8	0
chr1q23	1	1	4	9	0	3665		Donor8	0
chr1q24	1	1	4	11	0	3665		Donor8	0
chr1q25	1	1	4	21	0	3665		Donor8	0
chr1q31	1	1	4	6	0	3665		Donor8	0
chr1q32	1	1	4	25	0	3665		Donor8	0
chr1q41	1	1	4	9	0	3665		Donor8	0
chr1q42	1	1	4	21	0	3665		Donor8	0
chr1q43	1	1	4	4	0	3665		Donor8	0
chr2p11	1	1	4	10	0	3665		Donor8	0
chr2p12	1	1	4	2	0	3665		Donor8	0
chr2p13	1	1	4	13	0	3665		Donor8	0
chr2p14	1	1	4	9	0	3665		Donor8	0
chr2p15	1	1	4	6	0	3665		Donor8	0
chr2p16	1	1	4	12	0	3665		Donor8	0
chr2p21	1	1	4	12	0	3665		Donor8	0
chr2p22	1	1	4	18	0	3665		Donor8	0
chr2p23	1	1	4	18	0	3665		Donor8	0
chr2p24	1	1	4	3	0	3665		Donor8	0
chr2p25	1	1	4	8	0	3665		Donor8	0
chr2q12	1	1	4	4	0	3665		Donor8	0
chr2q13	1	1	4	5	0	3665		Donor8	0
chr2q14	1	1	4	18	0	3665		Donor8	0
chr2q21	1	1	4	10	0	3665		Donor8	0
chr2q22	1	1	4	8	0	3665		Donor8	0
chr2q23	1	1	4	9	0	3665		Donor8	0
chr2q24	1	1	4	9	0	3665		Donor8	0
chr2q31	1	1	4	23	0	3665		Donor8	0
chr2q32	1	1	4	8	0	3665		Donor8	0
chr2q33	1	1	4	25	0	3665		Donor8	0
chr2q34	1	1	4	5	0	3665		Donor8	0
chr2q35	1	1	4	5	0	3665		Donor8	0
chr2q36	1	1	4	9	0	3665		Donor8	0
chr3p11	1	1	4	2	0	3665		Donor8	0
chr3p12	1	1	4	3	0	3665		Donor8	0
chr3p13	1	1	4	4	0	3665		Donor8	0
chr3p14	1	1	4	17	0	3665		Donor8	0
chr3p21	1	1	4	35	0	3665		Donor8	0
chr3p22	1	1	4	18	0	3665		Donor8	0
chr3p23	1	1	4	1	0	3665		Donor8	0
chr3p24	1	1	4	13	0	3665		Donor8	0
chr3p25	1	1	4	15	0	3665		Donor8	0
chr3p26	1	1	4	5	0	3665		Donor8	0
chr3q11	1	1	4	2	0	3665		Donor8	0
chr3q12	1	1	4	6	0	3665		Donor8	0
chr3q13	1	1	4	14	0	3665		Donor8	0
chr3q21	1	1	4	17	0	3665		Donor8	0
chr3q22	1	1	4	12	0	3665		Donor8	0
chr3q23	1	1	4	9	0	3665		Donor8	0
chr3q25	1	1	4	13	0	3665		Donor8	0
chr3q26	1	1	4	18	0	3665		Donor8	0
chr3q27	1	1	4	12	0	3665		Donor8	0
chr3q28	1	1	4	3	0	3665		Donor8	0
chr3q29	1	1	4	15	0	3665		Donor8	0
chr4p11	1	1	4	3	0	3665		Donor8	0
chr4p12	1	1	4	2	0	3665		Donor8	0
chr4p13	1	1	4	2	0	3665		Donor8	0
chr4p14	1	1	4	16	0	3665		Donor8	0
chr4p15	1	1	4	12	0	3665		Donor8	0
chr4p16	1	1	4	24	0	3665		Donor8	0
chr4q12	1	1	4	7	0	3665		Donor8	0
chr4q22	1	1	4	15	0	3665		Donor8	0
chr4q24	1	1	4	7	0	3665		Donor8	0
chr4q25	1	1	4	4	0	3665		Donor8	0
chr4q26	1	1	4	3	0	3665		Donor8	0
chr4q27	1	1	4	1	0	3665		Donor8	0
chr4q31	1	1	4	18	0	3665		Donor8	0
chr4q32	1	1	4	9	0	3665		Donor8	0
chr4q33	1	1	4	3	0	3665		Donor8	0
chr4q35	1	1	4	6	0	3665		Donor8	0
chr5p12	1	1	4	2	0	3665		Donor8	0
chr5p13	1	1	4	10	0	3665		Donor8	0
chr5p14	1	1	4	0	0	3665		Donor8	0
chr5p15	1	1	4	13	0	3665		Donor8	0
chr5q11	1	1	4	11	0	3665		Donor8	0
chr5q12	1	1	4	9	0	3665		Donor8	0
chr5q13	1	1	4	10	0	3665		Donor8	0
chr5q14	1	1	4	20	0	3665		Donor8	0
chr5q15	1	1	4	8	0	3665		Donor8	0
chr5q21	1	1	4	7	0	3665		Donor8	0
chr5q22	1	1	4	5	0	3665		Donor8	0
chr5q23	1	1	4	13	0	3665		Donor8	0
chr5q31	1	1	4	21	0	3665		Donor8	0
chr5q33	1	1	4	11	0	3665		Donor8	0
chr5q34	1	1	4	1	0	3665		Donor8	0
chr5q35	1	1	4	27	0	3665		Donor8	0
chr6p11	1	1	4	1	0	3665		Donor8	0
chr6p21	1	1	4	32	0	3665		Donor8	0
chr6p22	1	1	4	16	0	3665		Donor8	0
chr6p23	1	1	4	1	0	3665		Donor8	0
chr6p24	1	1	4	5	0	3665		Donor8	0
chr6p25	1	1	4	14	0	3665		Donor8	0
chr6q11	1	1	4	0	0	3665		Donor8	0
chr6q12	1	1	4	2	0	3665		Donor8	0
chr6q13	1	1	4	6	0	3665		Donor8	0
chr6q14	1	1	4	10	0	3665		Donor8	0
chr6q15	1	1	4	7	0	3665		Donor8	0
chr6q16	1	1	4	7	0	3665		Donor8	0
chr6q21	1	1	4	14	0	3665		Donor8	0
chr6q22	1	1	4	11	0	3665		Donor8	0
chr6q23	1	1	4	11	0	3665		Donor8	0
chr6q24	1	1	4	11	0	3665		Donor8	0
chr6q25	1	1	4	19	0	3665		Donor8	0
chr6q26	1	1	4	3	0	3665		Donor8	0
chr6q27	1	1	4	4	0	3665		Donor8	0
chr7p11	1	1	4	2	0	3665		Donor8	0
chr7p12	1	1	4	2	0	3665		Donor8	0
chr7p13	1	1	4	5	0	3665		Donor8	0
chr7p14	1	1	4	14	0	3665		Donor8	0
chr7p15	1	1	4	12	0	3665		Donor8	0
chr7p21	1	1	4	8	0	3665		Donor8	0
chr7p22	1	1	4	21	0	3665		Donor8	0
chr7q11	1	1	4	24	0	3665		Donor8	0
chr7q21	1	1	4	16	0	3665		Donor8	0
chr7q22	1	1	4	19	0	3665		Donor8	0
chr7q31	1	1	4	16	0	3665		Donor8	0
chr7q32	1	1	4	8	0	3665		Donor8	0
chr7q33	1	1	4	7	0	3665		Donor8	0
chr7q34	1	1	4	7	0	3665		Donor8	0
chr7q35	1	1	4	2	0	3665		Donor8	0
chr7q36	1	1	4	14	0	3665		Donor8	0
chr8p11	1	1	4	11	0	3665		Donor8	0
chr8p12	1	1	4	6	0	3665		Donor8	0
chr8p21	1	1	4	18	0	3665		Donor8	0
chr8p22	1	1	4	8	0	3665		Donor8	0
chr8p23	1	1	4	12	0	3665		Donor8	0
chr8q11	1	1	4	6	0	3665		Donor8	0
chr8q12	1	1	4	8	0	3665		Donor8	0
chr8q13	1	1	4	7	0	3665		Donor8	0
chr8q21	1	1	4	9	0	3665		Donor8	0
chr8q22	1	1	4	14	0	3665		Donor8	0
chr8q23	1	1	4	3	0	3665		Donor8	0
chr8q24	1	1	4	30	0	3665		Donor8	0
chr9p11	1	1	4	0	0	3665		Donor8	0
chr9p12	1	1	4	0	0	3665		Donor8	0
chr9p13	1	1	4	13	0	3665		Donor8	0
chr9p23	1	1	4	1	0	3665		Donor8	0
chr9p24	1	1	4	13	0	3665		Donor8	0
chr9q12	1	1	4	0	0	3665		Donor8	0
chr9q13	1	1	4	0	0	3665		Donor8	0
chr9q21	1	1	4	19	0	3665		Donor8	0
chr9q22	1	1	4	21	0	3665		Donor8	0
chr9q31	1	1	4	9	0	3665		Donor8	0
chr9q32	1	1	4	5	0	3665		Donor8	0
chr9q33	1	1	4	25	0	3665		Donor8	0
chr9q34	1	1	4	24	0	3665		Donor8	0
chr10p12	1	1	4	15	0	3665		Donor8	0
chr10p13	1	1	4	5	0	3665		Donor8	0
chr10p14	1	1	4	8	0	3665		Donor8	0
chr10p15	1	1	4	8	0	3665		Donor8	0
chr10q11	1	1	4	15	0	3665		Donor8	0
chr10q21	1	1	4	11	0	3665		Donor8	0
chr10q22	1	1	4	30	0	3665		Donor8	0
chr10q23	1	1	4	21	0	3665		Donor8	0
chr10q24	1	1	4	25	0	3665		Donor8	0
chr10q25	1	1	4	8	0	3665		Donor8	0
chr10q26	1	1	4	22	0	3665		Donor8	0
chr11p11	1	1	4	16	0	3665		Donor8	0
chr11p12	1	1	4	3	0	3665		Donor8	0
chr11p14	1	1	4	2	0	3665		Donor8	0
chr11q12	1	1	4	9	0	3665		Donor8	0
chr11q13	1	1	4	38	0	3665		Donor8	0
chr11q14	1	1	4	12	0	3665		Donor8	0
chr11q22	1	1	4	9	0	3665		Donor8	0
chr11q23	1	1	4	16	0	3665		Donor8	0
chr11q24	1	1	4	9	0	3665		Donor8	0
chr11q25	1	1	4	2	0	3665		Donor8	0
chr12p11	1	1	4	11	0	3665		Donor8	0
chr12p12	1	1	4	12	0	3665		Donor8	0
chr12p13	1	1	4	24	0	3665		Donor8	0
chr12q12	1	1	4	10	0	3665		Donor8	0
chr12q13	1	1	4	30	0	3665		Donor8	0
chr12q14	1	1	4	8	0	3665		Donor8	0
chr12q15	1	1	4	8	0	3665		Donor8	0
chr12q21	1	1	4	13	0	3665		Donor8	0
chr12q22	1	1	4	9	0	3665		Donor8	0
chr12q23	1	1	4	20	0	3665		Donor8	0
chr12q24	1	1	4	54	0	3665		Donor8	0
chr13q11	1	1	4	0	0	3665		Donor8	0
chr13q12	1	1	4	17	0	3665		Donor8	0
chr13q13	1	1	4	9	0	3665		Donor8	0
chr13q14	1	1	4	34	0	3665		Donor8	0
chr13q22	1	1	4	6	0	3665		Donor8	0
chr13q31	1	1	4	3	0	3665		Donor8	0
chr13q32	1	1	4	11	0	3665		Donor8	0
chr13q33	1	1	4	3	0	3665		Donor8	0
chr14q11	1	1	4	7	0	3665		Donor8	0
chr14q12	1	1	4	6	0	3665		Donor8	0
chr14q13	1	1	4	5	0	3665		Donor8	0
chr14q21	1	1	4	9	0	3665		Donor8	0
chr14q22	1	1	4	13	0	3665		Donor8	0
chr14q23	1	1	4	13	0	3665		Donor8	0
chr14q24	1	1	4	23	0	3665		Donor8	0
chr14q31	1	1	4	5	0	3665		Donor8	0
chr14q32	1	1	4	36	0	3665		Donor8	0
chr15q11	1	1	4	4	0	3665		Donor8	0
chr15q12	1	1	4	0	0	3665		Donor8	0
chr15q13	1	1	4	6	0	3665		Donor8	0
chr15q14	1	1	4	7	0	3665		Donor8	0
chr15q15	1	1	4	20	0	3665		Donor8	0
chr15q21	1	1	4	26	0	3665		Donor8	0
chr15q22	1	1	4	22	0	3665		Donor8	0
chr15q23	1	1	4	9	0	3665		Donor8	0
chr15q24	1	1	4	18	0	3665		Donor8	0
chr15q25	1	1	4	13	0	3665		Donor8	0
chr15q26	1	1	4	10	0	3665		Donor8	0
chr16p11	1	1	4	7	0	3665		Donor8	0
chr16p12	1	1	4	19	0	3665		Donor8	0
chr16p13	1	1	4	38	0	3665		Donor8	0
chr16q11	1	1	4	0	0	3665		Donor8	0
chr16q12	1	1	4	14	0	3665		Donor8	0
chr16q13	1	1	4	2	0	3665		Donor8	0
chr16q21	1	1	4	2	0	3665		Donor8	0
chr16q22	1	1	4	21	0	3665		Donor8	0
chr16q23	1	1	4	9	0	3665		Donor8	0
chr16q24	1	1	4	20	0	3665		Donor8	0
chr17p11	1	1	4	13	0	3665		Donor8	0
chr17p12	1	1	4	2	0	3665		Donor8	0
chr17p13	1	1	4	34	0	3665		Donor8	0
chr17q11	1	1	4	25	0	3665		Donor8	0
chr17q12	1	1	4	12	0	3665		Donor8	0
chr17q21	1	1	4	31	0	3665		Donor8	0
chr17q22	1	1	4	5	0	3665		Donor8	0
chr17q23	1	1	4	17	0	3665		Donor8	0
chr17q24	1	1	4	10	0	3665		Donor8	0
chr17q25	1	1	4	34	0	3665		Donor8	0
chr18p11	1	1	4	21	0	3665		Donor8	0
chr18q11	1	1	4	10	0	3665		Donor8	0
chr18q12	1	1	4	13	0	3665		Donor8	0
chr18q21	1	1	4	20	0	3665		Donor8	0
chr18q22	1	1	4	6	0	3665		Donor8	0
chr18q23	1	1	4	5	0	3665		Donor8	0
chr19p12	1	1	4	4	0	3665		Donor8	0
chr19p13	1	1	4	67	0	3665		Donor8	0
chr19q13	1	1	4	47	0	3665		Donor8	0
chr20p11	1	1	4	9	0	3665		Donor8	0
chr20p12	1	1	4	10	0	3665		Donor8	0
chr20p13	1	1	4	12	0	3665		Donor8	0
chr20q11	1	1	4	25	0	3665		Donor8	0
chr20q12	1	1	4	3	0	3665		Donor8	0
chr20q13	1	1	4	28	0	3665		Donor8	0
chr21p11	1	1	4	0	0	3665		Donor8	0
chr21p12	1	1	4	0	0	3665		Donor8	0
chr21q11	1	1	4	1	0	3665		Donor8	0
chr21q21	1	1	4	9	0	3665		Donor8	0
chr22q11	1	1	4	19	0	3665		Donor8	0
chr22q12	1	1	4	19	0	3665		Donor8	0
chr22q13	1	1	4	33	0	3665		Donor8	0
chrXp11	1	1	4	17	0	3665		Donor8	0
chrXp21	1	1	4	2	0	3665		Donor8	0
chrXp22	1	1	4	17	0	3665		Donor8	0
chrXq11	1	1	4	1	0	3665		Donor8	0
chrXq12	1	1	4	3	0	3665		Donor8	0
chrXq13	1	1	4	7	0	3665		Donor8	0
chrXq21	1	1	4	6	0	3665		Donor8	0
chrXq22	1	1	4	4	0	3665		Donor8	0
chrXq23	1	1	4	4	0	3665		Donor8	0
chrXq24	1	1	4	5	0	3665		Donor8	0
chrXq25	1	1	4	3	0	3665		Donor8	0
chrXq26	1	1	4	10	0	3665		Donor8	0
chrXq27	1	1	4	1	0	3665		Donor8	0
chrXq28	1	1	4	7	0	3665		Donor8	0
PAR2	1	1	4	0	0	3665		Donor8	0
chrYp11	1	1	4	1	0	3665		Donor8	0
chrYq11	1	1	4	5	0	3665		Donor8	0
MT	1	1	4	8	0	3665		Donor8	0
chr15q26	0.015	1	5	11	1	3737	IQGAP1	Donor11	0
chr2p23	0.023	1	5	17	1	3737	FAM228B	Donor11	0
chr1p12	1	1	5	3	0	3737		Donor11	0
chr1p13	1	1	5	24	0	3737		Donor11	0
chr1p21	1	1	5	7	0	3737		Donor11	0
chr1p22	1	1	5	21	0	3737		Donor11	0
chr1p31	1	1	5	17	0	3737		Donor11	0
chr1p32	1	1	5	15	0	3737		Donor11	0
chr1p33	1	1	5	5	0	3737		Donor11	0
chr1p34	1	1	5	31	0	3737		Donor11	0
chr1p35	1	1	5	21	0	3737		Donor11	0
chr1p36	1	1	5	61	0	3737		Donor11	0
chr1q21	1	1	5	24	0	3737		Donor11	0
chr1q22	1	1	5	5	0	3737		Donor11	0
chr1q23	1	1	5	12	0	3737		Donor11	0
chr1q24	1	1	5	9	0	3737		Donor11	0
chr1q25	1	1	5	21	0	3737		Donor11	0
chr1q31	1	1	5	8	0	3737		Donor11	0
chr1q32	1	1	5	25	0	3737		Donor11	0
chr1q41	1	1	5	8	0	3737		Donor11	0
chr1q42	1	1	5	22	0	3737		Donor11	0
chr1q43	1	1	5	6	0	3737		Donor11	0
chr2p11	1	1	5	9	0	3737		Donor11	0
chr2p12	1	1	5	2	0	3737		Donor11	0
chr2p13	1	1	5	15	0	3737		Donor11	0
chr2p14	1	1	5	7	0	3737		Donor11	0
chr2p15	1	1	5	6	0	3737		Donor11	0
chr2p16	1	1	5	14	0	3737		Donor11	0
chr2p21	1	1	5	11	0	3737		Donor11	0
chr2p22	1	1	5	16	0	3737		Donor11	0
chr2p24	1	1	5	3	0	3737		Donor11	0
chr2p25	1	1	5	10	0	3737		Donor11	0
chr2q11	1	1	5	14	0	3737		Donor11	0
chr2q12	1	1	5	3	0	3737		Donor11	0
chr2q13	1	1	5	5	0	3737		Donor11	0
chr2q14	1	1	5	18	0	3737		Donor11	0
chr2q21	1	1	5	11	0	3737		Donor11	0
chr2q22	1	1	5	7	0	3737		Donor11	0
chr2q23	1	1	5	8	0	3737		Donor11	0
chr2q24	1	1	5	11	0	3737		Donor11	0
chr2q31	1	1	5	26	0	3737		Donor11	0
chr2q32	1	1	5	11	0	3737		Donor11	0
chr2q33	1	1	5	23	0	3737		Donor11	0
chr2q34	1	1	5	6	0	3737		Donor11	0
chr2q35	1	1	5	9	0	3737		Donor11	0
chr2q36	1	1	5	9	0	3737		Donor11	0
chr3p11	1	1	5	2	0	3737		Donor11	0
chr3p13	1	1	5	3	0	3737		Donor11	0
chr3p14	1	1	5	16	0	3737		Donor11	0
chr3p21	1	1	5	30	0	3737		Donor11	0
chr3p22	1	1	5	19	0	3737		Donor11	0
chr3p23	1	1	5	1	0	3737		Donor11	0
chr3p24	1	1	5	12	0	3737		Donor11	0
chr3p25	1	1	5	19	0	3737		Donor11	0
chr3p26	1	1	5	5	0	3737		Donor11	0
chr3q11	1	1	5	4	0	3737		Donor11	0
chr3q12	1	1	5	8	0	3737		Donor11	0
chr3q13	1	1	5	15	0	3737		Donor11	0
chr3q21	1	1	5	19	0	3737		Donor11	0
chr3q22	1	1	5	12	0	3737		Donor11	0
chr3q23	1	1	5	10	0	3737		Donor11	0
chr3q25	1	1	5	12	0	3737		Donor11	0
chr3q26	1	1	5	18	0	3737		Donor11	0
chr3q27	1	1	5	16	0	3737		Donor11	0
chr3q28	1	1	5	3	0	3737		Donor11	0
chr3q29	1	1	5	17	0	3737		Donor11	0
chr4p11	1	1	5	3	0	3737		Donor11	0
chr4p12	1	1	5	1	0	3737		Donor11	0
chr4p13	1	1	5	1	0	3737		Donor11	0
chr4p14	1	1	5	14	0	3737		Donor11	0
chr4p15	1	1	5	14	0	3737		Donor11	0
chr4p16	1	1	5	24	0	3737		Donor11	0
chr4q12	1	1	5	7	0	3737		Donor11	0
chr4q22	1	1	5	15	0	3737		Donor11	0
chr4q24	1	1	5	8	0	3737		Donor11	0
chr4q25	1	1	5	4	0	3737		Donor11	0
chr4q26	1	1	5	3	0	3737		Donor11	0
chr4q27	1	1	5	2	0	3737		Donor11	0
chr4q31	1	1	5	23	0	3737		Donor11	0
chr4q32	1	1	5	8	0	3737		Donor11	0
chr4q33	1	1	5	2	0	3737		Donor11	0
chr4q35	1	1	5	6	0	3737		Donor11	0
chr5p12	1	1	5	2	0	3737		Donor11	0
chr5p13	1	1	5	10	0	3737		Donor11	0
chr5p14	1	1	5	1	0	3737		Donor11	0
chr5p15	1	1	5	16	0	3737		Donor11	0
chr5q11	1	1	5	11	0	3737		Donor11	0
chr5q12	1	1	5	11	0	3737		Donor11	0
chr5q13	1	1	5	11	0	3737		Donor11	0
chr5q14	1	1	5	19	0	3737		Donor11	0
chr5q15	1	1	5	8	0	3737		Donor11	0
chr5q21	1	1	5	8	0	3737		Donor11	0
chr5q22	1	1	5	7	0	3737		Donor11	0
chr5q23	1	1	5	13	0	3737		Donor11	0
chr5q31	1	1	5	21	0	3737		Donor11	0
chr5q33	1	1	5	10	0	3737		Donor11	0
chr5q34	1	1	5	0	0	3737		Donor11	0
chr5q35	1	1	5	32	0	3737		Donor11	0
chr6p11	1	1	5	1	0	3737		Donor11	0
chr6p21	1	1	5	36	0	3737		Donor11	0
chr6p22	1	1	5	15	0	3737		Donor11	0
chr6p23	1	1	5	2	0	3737		Donor11	0
chr6p24	1	1	5	5	0	3737		Donor11	0
chr6p25	1	1	5	15	0	3737		Donor11	0
chr6q11	1	1	5	0	0	3737		Donor11	0
chr6q12	1	1	5	2	0	3737		Donor11	0
chr6q13	1	1	5	6	0	3737		Donor11	0
chr6q14	1	1	5	11	0	3737		Donor11	0
chr6q15	1	1	5	8	0	3737		Donor11	0
chr6q16	1	1	5	7	0	3737		Donor11	0
chr6q21	1	1	5	12	0	3737		Donor11	0
chr6q22	1	1	5	10	0	3737		Donor11	0
chr6q23	1	1	5	11	0	3737		Donor11	0
chr6q24	1	1	5	11	0	3737		Donor11	0
chr6q25	1	1	5	17	0	3737		Donor11	0
chr6q26	1	1	5	3	0	3737		Donor11	0
chr6q27	1	1	5	4	0	3737		Donor11	0
chr7p11	1	1	5	2	0	3737		Donor11	0
chr7p12	1	1	5	2	0	3737		Donor11	0
chr7p13	1	1	5	7	0	3737		Donor11	0
chr7p14	1	1	5	10	0	3737		Donor11	0
chr7p15	1	1	5	9	0	3737		Donor11	0
chr7p21	1	1	5	8	0	3737		Donor11	0
chr7p22	1	1	5	22	0	3737		Donor11	0
chr7q11	1	1	5	22	0	3737		Donor11	0
chr7q21	1	1	5	15	0	3737		Donor11	0
chr7q22	1	1	5	18	0	3737		Donor11	0
chr7q31	1	1	5	18	0	3737		Donor11	0
chr7q32	1	1	5	9	0	3737		Donor11	0
chr7q33	1	1	5	8	0	3737		Donor11	0
chr7q34	1	1	5	10	0	3737		Donor11	0
chr7q35	1	1	5	1	0	3737		Donor11	0
chr7q36	1	1	5	12	0	3737		Donor11	0
chr8p11	1	1	5	9	0	3737		Donor11	0
chr8p12	1	1	5	5	0	3737		Donor11	0
chr8p21	1	1	5	19	0	3737		Donor11	0
chr8p22	1	1	5	7	0	3737		Donor11	0
chr8p23	1	1	5	11	0	3737		Donor11	0
chr8q11	1	1	5	7	0	3737		Donor11	0
chr8q12	1	1	5	11	0	3737		Donor11	0
chr8q13	1	1	5	6	0	3737		Donor11	0
chr8q21	1	1	5	9	0	3737		Donor11	0
chr8q22	1	1	5	13	0	3737		Donor11	0
chr8q23	1	1	5	3	0	3737		Donor11	0
chr8q24	1	1	5	28	0	3737		Donor11	0
chr9p11	1	1	5	0	0	3737		Donor11	0
chr9p12	1	1	5	0	0	3737		Donor11	0
chr9p13	1	1	5	11	0	3737		Donor11	0
chr9p23	1	1	5	0	0	3737		Donor11	0
chr9p24	1	1	5	14	0	3737		Donor11	0
chr9q12	1	1	5	0	0	3737		Donor11	0
chr9q13	1	1	5	0	0	3737		Donor11	0
chr9q21	1	1	5	20	0	3737		Donor11	0
chr9q22	1	1	5	20	0	3737		Donor11	0
chr9q31	1	1	5	10	0	3737		Donor11	0
chr9q32	1	1	5	7	0	3737		Donor11	0
chr9q33	1	1	5	24	0	3737		Donor11	0
chr9q34	1	1	5	24	0	3737		Donor11	0
chr10p12	1	1	5	15	0	3737		Donor11	0
chr10p13	1	1	5	5	0	3737		Donor11	0
chr10p14	1	1	5	7	0	3737		Donor11	0
chr10p15	1	1	5	10	0	3737		Donor11	0
chr10q11	1	1	5	13	0	3737		Donor11	0
chr10q21	1	1	5	9	0	3737		Donor11	0
chr10q22	1	1	5	30	0	3737		Donor11	0
chr10q23	1	1	5	23	0	3737		Donor11	0
chr10q24	1	1	5	24	0	3737		Donor11	0
chr10q25	1	1	5	8	0	3737		Donor11	0
chr10q26	1	1	5	25	0	3737		Donor11	0
chr11p11	1	1	5	15	0	3737		Donor11	0
chr11p12	1	1	5	2	0	3737		Donor11	0
chr11p14	1	1	5	1	0	3737		Donor11	0
chr11q12	1	1	5	10	0	3737		Donor11	0
chr11q13	1	1	5	43	0	3737		Donor11	0
chr11q14	1	1	5	13	0	3737		Donor11	0
chr11q22	1	1	5	10	0	3737		Donor11	0
chr11q23	1	1	5	13	0	3737		Donor11	0
chr11q24	1	1	5	8	0	3737		Donor11	0
chr11q25	1	1	5	1	0	3737		Donor11	0
chr12p11	1	1	5	10	0	3737		Donor11	0
chr12p12	1	1	5	14	0	3737		Donor11	0
chr12p13	1	1	5	31	0	3737		Donor11	0
chr12q12	1	1	5	10	0	3737		Donor11	0
chr12q13	1	1	5	34	0	3737		Donor11	0
chr12q14	1	1	5	10	0	3737		Donor11	0
chr12q15	1	1	5	7	0	3737		Donor11	0
chr12q21	1	1	5	15	0	3737		Donor11	0
chr12q22	1	1	5	10	0	3737		Donor11	0
chr12q23	1	1	5	14	0	3737		Donor11	0
chr12q24	1	1	5	48	0	3737		Donor11	0
chr13q11	1	1	5	0	0	3737		Donor11	0
chr13q12	1	1	5	19	0	3737		Donor11	0
chr13q13	1	1	5	8	0	3737		Donor11	0
chr13q14	1	1	5	32	0	3737		Donor11	0
chr13q22	1	1	5	4	0	3737		Donor11	0
chr13q31	1	1	5	2	0	3737		Donor11	0
chr13q32	1	1	5	12	0	3737		Donor11	0
chr13q33	1	1	5	4	0	3737		Donor11	0
chr14q11	1	1	5	8	0	3737		Donor11	0
chr14q12	1	1	5	6	0	3737		Donor11	0
chr14q13	1	1	5	7	0	3737		Donor11	0
chr14q21	1	1	5	9	0	3737		Donor11	0
chr14q22	1	1	5	12	0	3737		Donor11	0
chr14q23	1	1	5	15	0	3737		Donor11	0
chr14q24	1	1	5	29	0	3737		Donor11	0
chr14q31	1	1	5	5	0	3737		Donor11	0
chr14q32	1	1	5	38	0	3737		Donor11	0
chr15q11	1	1	5	3	0	3737		Donor11	0
chr15q12	1	1	5	0	0	3737		Donor11	0
chr15q13	1	1	5	8	0	3737		Donor11	0
chr15q14	1	1	5	6	0	3737		Donor11	0
chr15q15	1	1	5	21	0	3737		Donor11	0
chr15q21	1	1	5	23	0	3737		Donor11	0
chr15q22	1	1	5	21	0	3737		Donor11	0
chr15q23	1	1	5	10	0	3737		Donor11	0
chr15q24	1	1	5	17	0	3737		Donor11	0
chr15q25	1	1	5	13	0	3737		Donor11	0
chr16p11	1	1	5	11	0	3737		Donor11	0
chr16p12	1	1	5	19	0	3737		Donor11	0
chr16p13	1	1	5	31	0	3737		Donor11	0
chr16q11	1	1	5	1	0	3737		Donor11	0
chr16q12	1	1	5	15	0	3737		Donor11	0
chr16q13	1	1	5	3	0	3737		Donor11	0
chr16q21	1	1	5	3	0	3737		Donor11	0
chr16q22	1	1	5	20	0	3737		Donor11	0
chr16q23	1	1	5	8	0	3737		Donor11	0
chr16q24	1	1	5	17	0	3737		Donor11	0
chr17p11	1	1	5	13	0	3737		Donor11	0
chr17p12	1	1	5	2	0	3737		Donor11	0
chr17p13	1	1	5	31	0	3737		Donor11	0
chr17q11	1	1	5	23	0	3737		Donor11	0
chr17q12	1	1	5	14	0	3737		Donor11	0
chr17q21	1	1	5	29	0	3737		Donor11	0
chr17q22	1	1	5	5	0	3737		Donor11	0
chr17q23	1	1	5	17	0	3737		Donor11	0
chr17q24	1	1	5	11	0	3737		Donor11	0
chr17q25	1	1	5	34	0	3737		Donor11	0
chr18p11	1	1	5	20	0	3737		Donor11	0
chr18q11	1	1	5	11	0	3737		Donor11	0
chr18q12	1	1	5	12	0	3737		Donor11	0
chr18q21	1	1	5	18	0	3737		Donor11	0
chr18q22	1	1	5	7	0	3737		Donor11	0
chr18q23	1	1	5	5	0	3737		Donor11	0
chr19p12	1	1	5	7	0	3737		Donor11	0
chr19p13	1	1	5	65	0	3737		Donor11	0
chr19q13	1	1	5	56	0	3737		Donor11	0
chr20p11	1	1	5	10	0	3737		Donor11	0
chr20p12	1	1	5	12	0	3737		Donor11	0
chr20p13	1	1	5	12	0	3737		Donor11	0
chr20q11	1	1	5	27	0	3737		Donor11	0
chr20q12	1	1	5	4	0	3737		Donor11	0
chr20q13	1	1	5	30	0	3737		Donor11	0
chr21p11	1	1	5	0	0	3737		Donor11	0
chr21p12	1	1	5	0	0	3737		Donor11	0
chr21q11	1	1	5	1	0	3737		Donor11	0
chr21q21	1	1	5	8	0	3737		Donor11	0
chr21q22	1	1	5	38	0	3737		Donor11	0
chr22q11	1	1	5	9	0	3737		Donor11	0
chr22q12	1	1	5	19	0	3737		Donor11	0
chr22q13	1	1	5	32	0	3737		Donor11	0
chrXp11	1	1	5	15	0	3737		Donor11	0
chrXp21	1	1	5	1	0	3737		Donor11	0
chrXp22	1	1	5	16	0	3737		Donor11	0
chrXq11	1	1	5	1	0	3737		Donor11	0
chrXq12	1	1	5	2	0	3737		Donor11	0
chrXq13	1	1	5	8	0	3737		Donor11	0
chrXq21	1	1	5	6	0	3737		Donor11	0
chrXq22	1	1	5	4	0	3737		Donor11	0
chrXq23	1	1	5	4	0	3737		Donor11	0
chrXq24	1	1	5	4	0	3737		Donor11	0
chrXq25	1	1	5	3	0	3737		Donor11	0
chrXq26	1	1	5	7	0	3737		Donor11	0
chrXq27	1	1	5	1	0	3737		Donor11	0
chrXq28	1	1	5	9	0	3737		Donor11	0
PAR2	1	1	5	0	0	3737		Donor11	0
chrYp11	1	1	5	1	0	3737		Donor11	0
chrYq11	1	1	5	5	0	3737		Donor11	0
MT	1	1	5	4	0	3737		Donor11	0
chr22q12	0.012	1	3	12	1	3052	RTCB	Donor18	0
chr4q22	0.014	1	3	14	1	3052	GRID2	Donor18	0
chr17q25	0.023	1	3	24	1	3052	TBCD	Donor18	0
chr1p12	1	1	3	3	0	3052		Donor18	0
chr1p13	1	1	3	21	0	3052		Donor18	0
chr1p21	1	1	3	5	0	3052		Donor18	0
chr1p22	1	1	3	10	0	3052		Donor18	0
chr1p31	1	1	3	18	0	3052		Donor18	0
chr1p32	1	1	3	13	0	3052		Donor18	0
chr1p33	1	1	3	3	0	3052		Donor18	0
chr1p34	1	1	3	24	0	3052		Donor18	0
chr1p35	1	1	3	16	0	3052		Donor18	0
chr1p36	1	1	3	50	0	3052		Donor18	0
chr1q21	1	1	3	23	0	3052		Donor18	0
chr1q22	1	1	3	5	0	3052		Donor18	0
chr1q23	1	1	3	8	0	3052		Donor18	0
chr1q24	1	1	3	8	0	3052		Donor18	0
chr1q25	1	1	3	18	0	3052		Donor18	0
chr1q31	1	1	3	6	0	3052		Donor18	0
chr1q32	1	1	3	18	0	3052		Donor18	0
chr1q41	1	1	3	8	0	3052		Donor18	0
chr1q42	1	1	3	13	0	3052		Donor18	0
chr1q43	1	1	3	4	0	3052		Donor18	0
chr2p11	1	1	3	8	0	3052		Donor18	0
chr2p12	1	1	3	3	0	3052		Donor18	0
chr2p13	1	1	3	11	0	3052		Donor18	0
chr2p14	1	1	3	8	0	3052		Donor18	0
chr2p15	1	1	3	6	0	3052		Donor18	0
chr2p16	1	1	3	11	0	3052		Donor18	0
chr2p21	1	1	3	11	0	3052		Donor18	0
chr2p22	1	1	3	17	0	3052		Donor18	0
chr2p23	1	1	3	13	0	3052		Donor18	0
chr2p24	1	1	3	2	0	3052		Donor18	0
chr2p25	1	1	3	6	0	3052		Donor18	0
chr2q11	1	1	3	8	0	3052		Donor18	0
chr2q12	1	1	3	3	0	3052		Donor18	0
chr2q13	1	1	3	4	0	3052		Donor18	0
chr2q14	1	1	3	16	0	3052		Donor18	0
chr2q21	1	1	3	9	0	3052		Donor18	0
chr2q22	1	1	3	8	0	3052		Donor18	0
chr2q23	1	1	3	7	0	3052		Donor18	0
chr2q24	1	1	3	7	0	3052		Donor18	0
chr2q31	1	1	3	18	0	3052		Donor18	0
chr2q32	1	1	3	8	0	3052		Donor18	0
chr2q33	1	1	3	22	0	3052		Donor18	0
chr2q34	1	1	3	3	0	3052		Donor18	0
chr2q35	1	1	3	6	0	3052		Donor18	0
chr2q36	1	1	3	9	0	3052		Donor18	0
chr3p11	1	1	3	1	0	3052		Donor18	0
chr3p12	1	1	3	2	0	3052		Donor18	0
chr3p13	1	1	3	4	0	3052		Donor18	0
chr3p14	1	1	3	12	0	3052		Donor18	0
chr3p21	1	1	3	26	0	3052		Donor18	0
chr3p22	1	1	3	17	0	3052		Donor18	0
chr3p23	1	1	3	1	0	3052		Donor18	0
chr3p24	1	1	3	12	0	3052		Donor18	0
chr3p25	1	1	3	14	0	3052		Donor18	0
chr3p26	1	1	3	4	0	3052		Donor18	0
chr3q11	1	1	3	1	0	3052		Donor18	0
chr3q12	1	1	3	3	0	3052		Donor18	0
chr3q13	1	1	3	13	0	3052		Donor18	0
chr3q21	1	1	3	14	0	3052		Donor18	0
chr3q22	1	1	3	11	0	3052		Donor18	0
chr3q23	1	1	3	8	0	3052		Donor18	0
chr3q25	1	1	3	11	0	3052		Donor18	0
chr3q26	1	1	3	16	0	3052		Donor18	0
chr3q27	1	1	3	12	0	3052		Donor18	0
chr3q28	1	1	3	4	0	3052		Donor18	0
chr3q29	1	1	3	12	0	3052		Donor18	0
chr4p11	1	1	3	3	0	3052		Donor18	0
chr4p12	1	1	3	2	0	3052		Donor18	0
chr4p13	1	1	3	2	0	3052		Donor18	0
chr4p14	1	1	3	12	0	3052		Donor18	0
chr4p15	1	1	3	11	0	3052		Donor18	0
chr4p16	1	1	3	19	0	3052		Donor18	0
chr4q12	1	1	3	6	0	3052		Donor18	0
chr4q24	1	1	3	7	0	3052		Donor18	0
chr4q25	1	1	3	3	0	3052		Donor18	0
chr4q26	1	1	3	3	0	3052		Donor18	0
chr4q27	1	1	3	1	0	3052		Donor18	0
chr4q31	1	1	3	15	0	3052		Donor18	0
chr4q32	1	1	3	8	0	3052		Donor18	0
chr4q33	1	1	3	3	0	3052		Donor18	0
chr4q35	1	1	3	5	0	3052		Donor18	0
chr5p12	1	1	3	2	0	3052		Donor18	0
chr5p13	1	1	3	9	0	3052		Donor18	0
chr5p14	1	1	3	1	0	3052		Donor18	0
chr5p15	1	1	3	12	0	3052		Donor18	0
chr5q11	1	1	3	11	0	3052		Donor18	0
chr5q12	1	1	3	6	0	3052		Donor18	0
chr5q13	1	1	3	8	0	3052		Donor18	0
chr5q14	1	1	3	18	0	3052		Donor18	0
chr5q15	1	1	3	7	0	3052		Donor18	0
chr5q21	1	1	3	7	0	3052		Donor18	0
chr5q22	1	1	3	4	0	3052		Donor18	0
chr5q23	1	1	3	11	0	3052		Donor18	0
chr5q31	1	1	3	16	0	3052		Donor18	0
chr5q33	1	1	3	9	0	3052		Donor18	0
chr5q34	1	1	3	0	0	3052		Donor18	0
chr5q35	1	1	3	23	0	3052		Donor18	0
chr6p11	1	1	3	1	0	3052		Donor18	0
chr6p21	1	1	3	24	0	3052		Donor18	0
chr6p22	1	1	3	15	0	3052		Donor18	0
chr6p23	1	1	3	2	0	3052		Donor18	0
chr6p24	1	1	3	4	0	3052		Donor18	0
chr6p25	1	1	3	12	0	3052		Donor18	0
chr6q11	1	1	3	0	0	3052		Donor18	0
chr6q12	1	1	3	2	0	3052		Donor18	0
chr6q13	1	1	3	4	0	3052		Donor18	0
chr6q14	1	1	3	10	0	3052		Donor18	0
chr6q15	1	1	3	4	0	3052		Donor18	0
chr6q16	1	1	3	6	0	3052		Donor18	0
chr6q21	1	1	3	13	0	3052		Donor18	0
chr6q22	1	1	3	9	0	3052		Donor18	0
chr6q23	1	1	3	10	0	3052		Donor18	0
chr6q24	1	1	3	9	0	3052		Donor18	0
chr6q25	1	1	3	16	0	3052		Donor18	0
chr6q26	1	1	3	3	0	3052		Donor18	0
chr6q27	1	1	3	4	0	3052		Donor18	0
chr7p11	1	1	3	2	0	3052		Donor18	0
chr7p12	1	1	3	2	0	3052		Donor18	0
chr7p13	1	1	3	5	0	3052		Donor18	0
chr7p14	1	1	3	11	0	3052		Donor18	0
chr7p15	1	1	3	10	0	3052		Donor18	0
chr7p21	1	1	3	8	0	3052		Donor18	0
chr7p22	1	1	3	16	0	3052		Donor18	0
chr7q11	1	1	3	17	0	3052		Donor18	0
chr7q21	1	1	3	15	0	3052		Donor18	0
chr7q22	1	1	3	14	0	3052		Donor18	0
chr7q31	1	1	3	15	0	3052		Donor18	0
chr7q32	1	1	3	7	0	3052		Donor18	0
chr7q33	1	1	3	5	0	3052		Donor18	0
chr7q34	1	1	3	6	0	3052		Donor18	0
chr7q35	1	1	3	1	0	3052		Donor18	0
chr7q36	1	1	3	12	0	3052		Donor18	0
chr8p11	1	1	3	10	0	3052		Donor18	0
chr8p12	1	1	3	3	0	3052		Donor18	0
chr8p21	1	1	3	16	0	3052		Donor18	0
chr8p22	1	1	3	8	0	3052		Donor18	0
chr8p23	1	1	3	8	0	3052		Donor18	0
chr8q11	1	1	3	6	0	3052		Donor18	0
chr8q12	1	1	3	9	0	3052		Donor18	0
chr8q13	1	1	3	6	0	3052		Donor18	0
chr8q21	1	1	3	7	0	3052		Donor18	0
chr8q22	1	1	3	10	0	3052		Donor18	0
chr8q23	1	1	3	3	0	3052		Donor18	0
chr8q24	1	1	3	23	0	3052		Donor18	0
chr9p11	1	1	3	0	0	3052		Donor18	0
chr9p12	1	1	3	0	0	3052		Donor18	0
chr9p13	1	1	3	10	0	3052		Donor18	0
chr9p23	1	1	3	0	0	3052		Donor18	0
chr9p24	1	1	3	12	0	3052		Donor18	0
chr9q12	1	1	3	0	0	3052		Donor18	0
chr9q13	1	1	3	1	0	3052		Donor18	0
chr9q21	1	1	3	16	0	3052		Donor18	0
chr9q22	1	1	3	17	0	3052		Donor18	0
chr9q31	1	1	3	9	0	3052		Donor18	0
chr9q32	1	1	3	5	0	3052		Donor18	0
chr9q33	1	1	3	19	0	3052		Donor18	0
chr9q34	1	1	3	17	0	3052		Donor18	0
chr10p12	1	1	3	13	0	3052		Donor18	0
chr10p13	1	1	3	4	0	3052		Donor18	0
chr10p14	1	1	3	7	0	3052		Donor18	0
chr10p15	1	1	3	8	0	3052		Donor18	0
chr10q11	1	1	3	10	0	3052		Donor18	0
chr10q21	1	1	3	11	0	3052		Donor18	0
chr10q22	1	1	3	23	0	3052		Donor18	0
chr10q23	1	1	3	19	0	3052		Donor18	0
chr10q24	1	1	3	20	0	3052		Donor18	0
chr10q25	1	1	3	7	0	3052		Donor18	0
chr10q26	1	1	3	17	0	3052		Donor18	0
chr11p11	1	1	3	14	0	3052		Donor18	0
chr11p12	1	1	3	2	0	3052		Donor18	0
chr11p14	1	1	3	1	0	3052		Donor18	0
chr11q12	1	1	3	5	0	3052		Donor18	0
chr11q13	1	1	3	32	0	3052		Donor18	0
chr11q14	1	1	3	11	0	3052		Donor18	0
chr11q22	1	1	3	7	0	3052		Donor18	0
chr11q23	1	1	3	14	0	3052		Donor18	0
chr11q24	1	1	3	9	0	3052		Donor18	0
chr11q25	1	1	3	1	0	3052		Donor18	0
chr12p11	1	1	3	9	0	3052		Donor18	0
chr12p12	1	1	3	12	0	3052		Donor18	0
chr12p13	1	1	3	18	0	3052		Donor18	0
chr12q12	1	1	3	9	0	3052		Donor18	0
chr12q13	1	1	3	24	0	3052		Donor18	0
chr12q14	1	1	3	7	0	3052		Donor18	0
chr12q15	1	1	3	6	0	3052		Donor18	0
chr12q21	1	1	3	11	0	3052		Donor18	0
chr12q22	1	1	3	6	0	3052		Donor18	0
chr12q23	1	1	3	14	0	3052		Donor18	0
chr12q24	1	1	3	42	0	3052		Donor18	0
chr13q11	1	1	3	0	0	3052		Donor18	0
chr13q12	1	1	3	13	0	3052		Donor18	0
chr13q13	1	1	3	5	0	3052		Donor18	0
chr13q14	1	1	3	26	0	3052		Donor18	0
chr13q22	1	1	3	4	0	3052		Donor18	0
chr13q31	1	1	3	3	0	3052		Donor18	0
chr13q32	1	1	3	11	0	3052		Donor18	0
chr13q33	1	1	3	3	0	3052		Donor18	0
chr14q11	1	1	3	6	0	3052		Donor18	0
chr14q12	1	1	3	5	0	3052		Donor18	0
chr14q13	1	1	3	5	0	3052		Donor18	0
chr14q21	1	1	3	8	0	3052		Donor18	0
chr14q22	1	1	3	11	0	3052		Donor18	0
chr14q23	1	1	3	13	0	3052		Donor18	0
chr14q24	1	1	3	20	0	3052		Donor18	0
chr14q31	1	1	3	5	0	3052		Donor18	0
chr14q32	1	1	3	33	0	3052		Donor18	0
chr15q11	1	1	3	3	0	3052		Donor18	0
chr15q12	1	1	3	0	0	3052		Donor18	0
chr15q13	1	1	3	6	0	3052		Donor18	0
chr15q14	1	1	3	6	0	3052		Donor18	0
chr15q15	1	1	3	15	0	3052		Donor18	0
chr15q21	1	1	3	22	0	3052		Donor18	0
chr15q22	1	1	3	20	0	3052		Donor18	0
chr15q23	1	1	3	8	0	3052		Donor18	0
chr15q24	1	1	3	14	0	3052		Donor18	0
chr15q25	1	1	3	12	0	3052		Donor18	0
chr15q26	1	1	3	9	0	3052		Donor18	0
chr16p11	1	1	3	6	0	3052		Donor18	0
chr16p12	1	1	3	18	0	3052		Donor18	0
chr16p13	1	1	3	28	0	3052		Donor18	0
chr16q11	1	1	3	0	0	3052		Donor18	0
[truncated: 6,401 more rows]
