# Supplementary material for: Mosaic loss of Chromosome Y in aged human microglia
Source: HighWire-hosted journal article supplement (doi:10.1101/gr.276409.121), 2022-08-30
Supplement: Supplemental_Table_S5.xlsx [file Supplemental_Table_S5.xlsx]

## Sheet: Description
Supplemental Table S5:
Information on the given tabs are found below
Metascape gene set enrichment analysis on mLATE genes	Metascape_GSEA_mLATE
Metascape mLATE gene annotation	mLATE_genes

## Sheet: Metascape_GSEA_mLATE
GroupID	Category	Term	Description	LogP	Log(q-value)	Sig	InTerm_InList	Symbols	Sig
1_Member	GO Biological Processes	GO:0051056	regulation of small GTPase mediated signal transduction	-9.07273	-4.72466	*	15/299	ABCA1,APOE,DOCK3,IGF1,ROBO1,SLIT2,SRGAP3,MCF2L,PSD3,CYRIB,RALGAPA2,PLEKHG1,HEG1,CGNL1,P2RY8	*
2_Member	WikiPathways	WP111	Electron transport chain: OXPHOS system in mitochondria	-7.6053	-3.67525	*	9/106	SLC25A6,COX1,COX2,COX3,CYTB,ND1,ND2,ND3,ND4	*
3_Member	Reactome Gene Sets	R-HSA-9013149	RAC1 GTPase cycle	-7.5462	-3.67525	*	11/185	DOCK1,DOCK3,PAK1,CDC42BPA,SRGAP3,IQGAP2,CYFIP1,MCF2L,PLEKHG1,ARAP2,WIPF3	*
2_Member	GO Biological Processes	GO:0019646	aerobic electron transport chain	-7.09165	-3.34564	*	8/87	COX1,COX2,COX3,CYTB,ND1,ND2,ND3,ND4	*
2_Member	GO Biological Processes	GO:0042773	ATP synthesis coupled electron transport	-6.90109	-3.33117	*	8/92	COX1,COX2,COX3,CYTB,ND1,ND2,ND3,ND4	*
2_Member	GO Biological Processes	GO:0042775	mitochondrial ATP synthesis coupled electron transport	-6.90109	-3.33117	*	8/92	COX1,COX2,COX3,CYTB,ND1,ND2,ND3,ND4	*
2_Member	KEGG Pathway	hsa05208	Chemical carcinogenesis - reactive oxygen species	-6.7207	-3.21773	*	11/223	SLC25A6,COX1,COX2,COX3,CYTB,ND1,ND2,ND3,ND4,NFE2L2,AKT3	*
2_Member	Reactome Gene Sets	R-HSA-611105	Respiratory electron transport	-6.51938	-3.0744	*	8/103	COX1,COX2,COX3,CYTB,ND1,ND2,ND3,ND4	*
2_Member	GO Biological Processes	GO:0022904	respiratory electron transport chain	-6.18045	-2.93922	*	8/114	COX1,COX2,COX3,CYTB,ND1,ND2,ND3,ND4	*
2_Member	KEGG Pathway	hsa05415	Diabetic cardiomyopathy	-6.15363	-2.93922	*	10/203	SLC25A6,COX1,COX2,COX3,CYTB,ND1,ND2,ND3,ND4,AKT3	*
3_Member	Reactome Gene Sets	R-HSA-9013148	CDC42 GTPase cycle	-6.18598	-2.93922	*	9/155	PAK1,CDC42BPA,SRGAP3,IQGAP2,MCF2L,PLEKHG1,ARAP2,CPNE8,WIPF3	*
4_Member	GO Biological Processes	GO:0033344	cholesterol efflux	-6.25756	-2.93922	*	5/26	ABCA1,APOC1,APOE,NPC1,ABCG1	*
4_Member	GO Biological Processes	GO:0033700	phospholipid efflux	-6.14116	-2.93922	*	4/12	ABCA1,APOC1,APOE,ABCG1	*
5_Member	GO Biological Processes	GO:0030155	regulation of cell adhesion	-6.20119	-2.93922	*	19/786	ALOX5,RHOH,B2M,CEBPB,DOCK1,DSCAM,IGF1,IL15,PLAUR,ST6GAL1,TGFBI,UTRN,CXCR4,LILRB4,MMRN1,TNFRSF21,CYRIB,APBB1IP,CARD11	*
2_Member	GO Biological Processes	GO:0046034	ATP metabolic process	-6.05733	-2.89286	*	10/208	ABCC6,COX1,COX2,COX3,CYTB,ND1,ND2,ND3,ND4,PFKP	*
2_Member	GO Biological Processes	GO:0006119	oxidative phosphorylation	-6.01061	-2.89286	*	8/120	COX1,COX2,COX3,CYTB,ND1,ND2,ND3,ND4	*
2_Member	CORUM	CORUM:2886	Respiratory chain complex I (incomplete intermediate ND1, ND2, ND3, CIA30 assembly), mitochondrial	-6.01048	-2.89286	*	3/4	ND1,ND2,ND3	*
2_Member	KEGG Pathway	hsa05010	Alzheimer disease	-5.96401	-2.87121	*	13/384	SLC25A6,APOE,CACNA1D,COX1,COX2,COX3,CYTB,ND1,ND2,ND3,ND4,IRS2,AKT3	*
6_Member	KEGG Pathway	hsa04260	Cardiac muscle contraction	-5.87451	-2.80519	*	7/87	CACNA1D,CACNB2,CACNB4,COX1,COX2,COX3,CYTB	*
2_Member	Reactome Gene Sets	R-HSA-163200	Respiratory electron transport, ATP synthesis by chemiosmotic coupling, and heat production by uncoupling proteins.	-5.82406	-2.77702	*	8/127	COX1,COX2,COX3,CYTB,ND1,ND2,ND3,ND4	*
2_Member	KEGG Pathway	hsa00190	Oxidative phosphorylation	-5.6487	-2.62384	*	8/134	COX1,COX2,COX3,CYTB,ND1,ND2,ND3,ND4	*
2_Member	KEGG Pathway	hsa04714	Thermogenesis	-5.62949	-2.62384	*	10/232	COX1,COX2,COX3,CYTB,ND1,ND2,ND3,ND4,RPS6KA3,SLC25A29	*
4_Member	GO Biological Processes	GO:0015748	organophosphate ester transport	-5.48336	-2.49701	*	8/141	ABCA1,SLC25A6,APOC1,APOE,ABCC6,ABCG1,ABCC4,ATP8B4	*
4_Member	Reactome Gene Sets	R-HSA-9029569	NR1H3 & NR1H2 regulate gene expression linked to cholesterol transport and efflux	-5.46065	-2.49279	*	5/37	ABCA1,APOC1,APOE,ABCG1,ARL4C	*
4_Member	Reactome Gene Sets	R-HSA-8963898	Plasma lipoprotein assembly	-5.26237	-2.32927	*	4/19	A2M,ABCA1,APOC1,APOE	*
5_Member	GO Biological Processes	GO:0070663	regulation of leukocyte proliferation	-5.26521	-2.32927	*	10/255	CEBPB,CSF2RA,GPR183,IGF1,IL15,ST6GAL1,IRS2,LILRB4,TNFRSF21,CARD11	*
3_Member	Reactome Gene Sets	R-HSA-9012999	RHO GTPase cycle	-5.22209	-2.30538	*	13/449	RHOH,DOCK1,DOCK3,PAK1,CDC42BPA,SRGAP3,IQGAP2,CYFIP1,MCF2L,PLEKHG1,ARAP2,CPNE8,WIPF3	*
2_Member	KEGG Pathway	hsa05012	Parkinson disease	-5.10438	-2.23343	*	10/266	SLC25A6,COX1,COX2,COX3,CYTB,ND1,ND2,ND3,ND4,NFE2L2	*
4_Member	Reactome Gene Sets	R-HSA-174824	Plasma lipoprotein assembly, remodeling, and clearance	-5.12823	-2.23343	*	6/74	A2M,ABCA1,APOC1,APOE,NPC1,ABCG1	*
7_Member	GO Biological Processes	GO:0042110	T cell activation	-5.11867	-2.23343	*	10/265	RHOH,B2M,CTSL,GPR183,IL15,ITGAL,FOXP1,APBB1IP,WDFY4,CARD11	*
2_Member	GO Biological Processes	GO:0009060	aerobic respiration	-5.07762	-2.22091	*	8/160	COX1,COX2,COX3,CYTB,ND1,ND2,ND3,ND4	*
2_Member	KEGG Pathway	hsa05020	Prion disease	-5.00607	-2.19061	*	10/273	SLC25A6,CACNA1D,COX1,COX2,COX3,CYTB,ND1,ND2,ND3,ND4	*
5_Member	GO Biological Processes	GO:0045785	positive regulation of cell adhesion	-5.00053	-2.19061	*	13/471	ALOX5,RHOH,B2M,DOCK1,IGF1,IL15,PLAUR,UTRN,LILRB4,MMRN1,CYRIB,APBB1IP,CARD11	*
8_Member	GO Biological Processes	GO:1903706	regulation of hemopoiesis	-5.01446	-2.19061	*	12/400	RHOH,B2M,CEBPB,IL15,MEIS1,ROR2,LILRB4,RBFOX2,FOXP1,TMEM176B,CARD11,SCIN	*
9_Member	Reactome Gene Sets	R-HSA-109582	Hemostasis	-4.99461	-2.19061	*	15/621	A2M,DOCK1,DOCK3,GNG7,IGF1,ITGAL,CD99,PDE9A,PLAUR,ABCC4,MMRN1,KIF1B,CYRIB,APBB1IP,CABLES1	*
2_Member	GO Biological Processes	GO:0022900	electron transport chain	-4.94179	-2.15649	*	8/167	COX1,COX2,COX3,CYTB,ND1,ND2,ND3,ND4	*
4_Member	Reactome Gene Sets	R-HSA-9024446	NR1H2 and NR1H3-mediated signaling	-4.93635	-2.15649	*	5/47	ABCA1,APOC1,APOE,ABCG1,ARL4C	*
10_Member	Reactome Gene Sets	R-HSA-428543	Inactivation of CDC42 and RAC1	-4.87243	-2.10415	*	3/8	ROBO1,SLIT2,SRGAP3	*
10_Member	Reactome Gene Sets	R-HSA-373752	Netrin-1 signaling	-4.80272	-2.04571	*	5/50	DOCK1,DSCAM,PAK1,ROBO1,SLIT2	*
1_Member	GO Biological Processes	GO:0035023	regulation of Rho protein signal transduction	-4.7221	-2.01271	*	6/87	ABCA1,APOE,ROBO1,MCF2L,HEG1,P2RY8	*
2_Member	Reactome Gene Sets	R-HSA-1428517	The citric acid (TCA) cycle and respiratory electron transport	-4.74101	-2.01271	*	8/178	COX1,COX2,COX3,CYTB,ND1,ND2,ND3,ND4	*
5_Member	GO Biological Processes	GO:0032944	regulation of mononuclear cell proliferation	-4.7255	-2.01271	*	9/234	CEBPB,GPR183,IGF1,IL15,ST6GAL1,IRS2,LILRB4,TNFRSF21,CARD11	*
11_Member	GO Biological Processes	GO:0032956	regulation of actin cytoskeleton organization	-4.73632	-2.01271	*	11/358	RHOH,HCK,PAK1,PAM,SLIT2,MTSS1,IQGAP2,CYFIP1,CYRIB,CGNL1,SCIN	*
12_Member	Reactome Gene Sets	R-HSA-9675108	Nervous system development	-4.71733	-2.01271	*	14/577	CACNA1D,CACNB2,CACNB4,DOCK1,DSCAM,KCNQ3,PAK1,ROBO1,RPS6KA3,UTRN,CXCR4,IRS2,SLIT2,SRGAP3	*
10_Member	GO Biological Processes	GO:0035239	tube morphogenesis	-4.66325	-1.96839	*	15/663	APOE,BMPR1A,MEIS1,PAK1,ROBO1,SAT1,TGFBI,CXCR4,RECK,SGPL1,SLIT2,MTSS1,RAMP1,HEG1,SHROOM3	*
1_Member	GO Biological Processes	GO:0046578	regulation of Ras protein signal transduction	-4.5871	-1.90178	*	8/187	ABCA1,APOE,IGF1,ROBO1,MCF2L,PSD3,HEG1,P2RY8	*
2_Member	GO Biological Processes	GO:0045333	cellular respiration	-4.53769	-1.86172	*	8/190	COX1,COX2,COX3,CYTB,ND1,ND2,ND3,ND4	*
13_Member	GO Biological Processes	GO:0016032	viral process	-4.52718	-1.86035	*	9/248	APOE,CTSL,ITGB5,MRC1,NPC1,ST6GAL1,CXCR4,USP6NL,ST6GALNAC3	*
5_Member	GO Biological Processes	GO:0022409	positive regulation of cell-cell adhesion	-4.50851	-1.85063	*	10/312	ALOX5,RHOH,B2M,IGF1,IL15,PLAUR,LILRB4,MMRN1,CYRIB,CARD11	*
14_Member	Canonical Pathways	M169	PID INTEGRIN2 PATHWAY	-4.49645	-1.84735	*	4/29	C3,ITGAL,PLAUR,TGFBI	*
4_Member	GO Biological Processes	GO:0030301	cholesterol transport	-4.37865	-1.73815	*	5/61	ABCA1,APOC1,APOE,NPC1,ABCG1	*
2_Member	KEGG Pathway	hsa04723	Retrograde endocannabinoid signaling	-4.35425	-1.72219	*	7/148	CACNA1A,CACNA1D,GNG7,ND1,ND2,ND3,ND4	*
11_Member	GO Biological Processes	GO:0032970	regulation of actin filament-based process	-4.30788	-1.68409	*	11/399	RHOH,HCK,PAK1,PAM,SLIT2,MTSS1,IQGAP2,CYFIP1,CYRIB,CGNL1,SCIN	*
6_Member	Reactome Gene Sets	R-HSA-112308	Presynaptic depolarization and calcium channel opening	-4.28627	-1.67791	*	3/12	CACNA1A,CACNB2,CACNB4	*
12_Member	Reactome Gene Sets	R-HSA-422475	Axon guidance	-4.28562	-1.67791	*	13/552	CACNA1D,CACNB2,CACNB4,DOCK1,DSCAM,KCNQ3,PAK1,ROBO1,RPS6KA3,CXCR4,IRS2,SLIT2,SRGAP3	*
5_Member	GO Biological Processes	GO:0022407	regulation of cell-cell adhesion	-4.26707	-1.67042	*	12/477	ALOX5,RHOH,B2M,CEBPB,IGF1,IL15,PLAUR,LILRB4,MMRN1,TNFRSF21,CYRIB,CARD11	*
7_Member	GO Biological Processes	GO:0030217	T cell differentiation	-4.26262	-1.67042	*	7/153	RHOH,B2M,CTSL,GPR183,IL15,FOXP1,CARD11	*
8_Member	GO Biological Processes	GO:0045637	regulation of myeloid cell differentiation	-4.22999	-1.64534	*	8/210	B2M,CEBPB,MEIS1,ROR2,LILRB4,RBFOX2,FOXP1,SCIN	*
4_Member	Reactome Gene Sets	R-HSA-382551	Transport of small molecules	-4.19535	-1.6239	*	15/729	A2M,ABCA1,SLC25A6,APOC1,APOE,ABCC6,GNG7,NPC1,ABCG1,ABCC4,SLC44A2,ATP8B4,SLC25A29,SLC43A2,SLC9A9	*
6_Member	GO Biological Processes	GO:0098655	cation transmembrane transport	-4.19382	-1.6239	*	14/645	CACNA1A,CACNA1D,CACNB2,CACNB4,KCNQ3,COX1,COX2,COX3,CYTB,ND4,KCNIP1,TMEM163,SLC25A29,SLC9A9	*
15_Member	Canonical Pathways	M295	SIG PIP3 SIGNALING IN CARDIAC MYOCTES	-4.18147	-1.61873	*	5/67	IGF1,PAK1,RPS6KA3,IRS2,AKT3	*
2_Member	CORUM	CORUM:2919	Respiratory chain complex I (gamma subunit) mitochondrial	-4.17435	-1.61867	*	3/13	ND1,ND2,ND3	*
5_Member	GO Biological Processes	GO:0070665	positive regulation of leukocyte proliferation	-4.15709	-1.60836	*	7/159	CSF2RA,GPR183,IGF1,IL15,ST6GAL1,IRS2,CARD11	*
7_Member	GO Biological Processes	GO:0046649	lymphocyte activation	-4.13681	-1.59492	*	11/417	RHOH,B2M,CTSL,GPR183,IL15,ITGAL,AKAP17A,FOXP1,APBB1IP,WDFY4,CARD11	*
16_Member	KEGG Pathway	hsa04810	Regulation of actin cytoskeleton	-4.11641	-1.58125	*	8/218	DOCK1,ITGAL,ITGB5,PAK1,CXCR4,IQGAP2,CYFIP1,SCIN	*
10_Member	GO Biological Processes	GO:0048514	blood vessel morphogenesis	-4.10006	-1.57154	*	11/421	APOE,BMPR1A,MEIS1,ROBO1,SAT1,TGFBI,RECK,SGPL1,SLIT2,RAMP1,HEG1	*
6_Member	GO Biological Processes	GO:0098662	inorganic cation transmembrane transport	-4.09199	-1.56999	*	13/577	CACNA1A,CACNA1D,CACNB2,CACNB4,KCNQ3,COX1,COX2,COX3,CYTB,ND4,KCNIP1,TMEM163,SLC9A9	*
4_Member	GO Biological Processes	GO:0010872	regulation of cholesterol esterification	-4.07163	-1.56865	*	3/14	APOC1,APOE,ABCG1	*
10_Member	Reactome Gene Sets	R-HSA-428540	Activation of RAC1	-4.07163	-1.56865	*	3/14	PAK1,ROBO1,SLIT2	*
17_Member	CORUM	CORUM:6442	Cytochrome c oxidase, mitochondrial	-4.07163	-1.56865	*	3/14	COX1,COX2,COX3	*
10_Member	GO Biological Processes	GO:0001568	blood vessel development	-4.03249	-1.54175	*	12/505	APOE,BMPR1A,NDST1,MEIS1,ROBO1,SAT1,TGFBI,RECK,SGPL1,SLIT2,RAMP1,HEG1	*
18_Member	GO Biological Processes	GO:0032102	negative regulation of response to external stimulus	-4.03681	-1.54175	*	11/428	A2M,ALOX5,APOE,GRID2,HCK,IGF1,HTRA1,ROBO1,ST6GAL1,SLIT2,MMRN1	*
19_Member	GO Biological Processes	GO:0050920	regulation of chemotaxis	-4.00766	-1.52291	*	8/226	DSCAM,GPR183,ROBO1,ST6GAL1,CXCR4,SLIT2,CYRIB,MTUS1	*
19_Member	GO Biological Processes	GO:0010975	regulation of neuron projection development	-3.99242	-1.51358	*	11/433	APOE,B2M,DSCAM,GRID2,NFE2L2,ROR2,PAK1,ROBO1,SLIT2,CYFIP1,ZNF804A	*
3_Member	Reactome Gene Sets	R-HSA-9013408	RHOG GTPase cycle	-3.97472	-1.50171	*	5/74	DOCK1,DOCK3,IQGAP2,CYFIP1,MCF2L	*
5_Member	GO Biological Processes	GO:1903037	regulation of leukocyte cell-cell adhesion	-3.95176	-1.49018	*	10/364	ALOX5,RHOH,B2M,CEBPB,IGF1,IL15,LILRB4,TNFRSF21,CYRIB,CARD11	*
20_Member	GO Biological Processes	GO:0050900	leukocyte migration	-3.95499	-1.49018	*	8/230	ALOX5,LYST,GPR183,HCK,ITGAL,CD99,ROR2,CXCR4	*
5_Member	GO Biological Processes	GO:0050670	regulation of lymphocyte proliferation	-3.94199	-1.48601	*	8/231	CEBPB,GPR183,IGF1,IL15,IRS2,LILRB4,TNFRSF21,CARD11	*
6_Member	GO Biological Processes	GO:0034762	regulation of transmembrane transport	-3.90917	-1.46419	*	13/602	C3,CACNA1A,CACNA1D,CACNB2,CACNB4,IGF1,KCNQ3,NFE2L2,UTRN,IRS2,KCNIP1,SESTD1,SLC43A2	*
4_Member	GO Biological Processes	GO:0034375	high-density lipoprotein particle remodeling	-3.88857	-1.44898	*	3/16	APOC1,APOE,ABCG1	*
4_Member	GO Biological Processes	GO:0015918	sterol transport	-3.86609	-1.44743	*	5/78	ABCA1,APOC1,APOE,NPC1,ABCG1	*
7_Member	GO Biological Processes	GO:0045321	leukocyte activation	-3.8674	-1.44743	*	12/526	RHOH,B2M,CTSL,GPR183,IL15,ITGAL,AKAP17A,DYSF,FOXP1,APBB1IP,WDFY4,CARD11	*
7_Member	GO Biological Processes	GO:0046631	alpha-beta T cell activation	-3.86609	-1.44743	*	5/78	CTSL,GPR183,IL15,FOXP1,WDFY4	*
10_Member	GO Biological Processes	GO:0001944	vasculature development	-3.8674	-1.44743	*	12/526	APOE,BMPR1A,NDST1,MEIS1,ROBO1,SAT1,TGFBI,RECK,SGPL1,SLIT2,RAMP1,HEG1	*
2_Member	GO Biological Processes	GO:1902600	proton transmembrane transport	-3.85894	-1.44537	*	6/124	COX1,COX2,COX3,CYTB,ND4,SLC9A9	*
4_Member	GO Biological Processes	GO:0071827	plasma lipoprotein particle organization	-3.85092	-1.44237	*	4/42	ABCA1,APOC1,APOE,ABCG1	*
2_Member	KEGG Pathway	hsa05016	Huntington disease	-3.82865	-1.42997	*	9/306	SLC25A6,COX1,COX2,COX3,CYTB,ND1,ND2,ND3,ND4	*
11_Member	GO Biological Processes	GO:0051493	regulation of cytoskeleton organization	-3.82936	-1.42997	*	12/531	RHOH,HCK,PAK1,PAM,SLIT2,MTSS1,IQGAP2,CYFIP1,CYRIB,AFAP1,CGNL1,SCIN	*
13_Member	GO Biological Processes	GO:0019058	viral life cycle	-3.8211	-1.42861	*	7/180	APOE,CTSL,ITGB5,MRC1,NPC1,CXCR4,USP6NL	*
4_Member	GO Biological Processes	GO:0043691	reverse cholesterol transport	-3.80626	-1.42198	*	3/17	ABCA1,APOE,ABCG1	*
15_Member	GO Biological Processes	GO:0010828	positive regulation of glucose transmembrane transport	-3.77139	-1.39644	*	4/44	C3,IGF1,NFE2L2,IRS2	*
5_Member	GO Biological Processes	GO:0050865	regulation of cell activation	-3.76464	-1.39429	*	14/709	APOE,RHOH,B2M,CEBPB,GPR183,IGF1,IL15,IRS2,CD226,LILRB4,MMRN1,TNFRSF21,CYRIB,CARD11	*
2_Member	GO Biological Processes	GO:0006120	mitochondrial electron transport, NADH to ubiquinone	-3.73309	-1.37624	*	4/45	ND1,ND2,ND3,ND4	*
4_Member	GO Biological Processes	GO:0071825	protein-lipid complex subunit organization	-3.73309	-1.37624	*	4/45	ABCA1,APOC1,APOE,ABCG1	*
2_Member	GO Biological Processes	GO:0015980	energy derivation by oxidation of organic compounds	-3.67203	-1.32396	*	8/253	COX1,COX2,COX3,CYTB,ND1,ND2,ND3,ND4	*
3_Member	Reactome Gene Sets	R-HSA-2029480	Fcgamma receptor (FCGR) dependent phagocytosis	-3.6663	-1.32255	*	5/86	DOCK1,HCK,PAK1,CYFIP1,WIPF3	*
6_Member	GO Biological Processes	GO:0098660	inorganic ion transmembrane transport	-3.62398	-1.3005		13/644	CACNA1A,CACNA1D,CACNB2,CACNB4,KCNQ3,COX1,COX2,COX3,CYTB,ND4,KCNIP1,TMEM163,SLC9A9
7_Member	GO Biological Processes	GO:0001775	cell activation	-3.60458	-1.2859		13/647	RHOH,B2M,CTSL,GPR183,IGF1,IL15,ITGAL,AKAP17A,DYSF,FOXP1,APBB1IP,WDFY4,CARD11
4_Member	GO Biological Processes	GO:0032367	intracellular cholesterol transport	-3.58791	-1.27726		3/20	ABCA1,NPC1,ABCG1
19_Member	GO Biological Processes	GO:0008038	neuron recognition	-3.58869	-1.27726		4/49	DSCAM,ROBO1,CXCR4,TNFRSF21
6_Member	KEGG Pathway	hsa05410	Hypertrophic cardiomyopathy	-3.57406	-1.26738		5/90	CACNA1D,CACNB2,CACNB4,IGF1,ITGB5
4_Member	KEGG Pathway	hsa04979	Cholesterol metabolism	-3.55461	-1.25304		4/50	ABCA1,APOC1,APOE,NPC1
5_Member	GO Biological Processes	GO:1903039	positive regulation of leukocyte cell-cell adhesion	-3.53648	-1.24149		8/265	ALOX5,RHOH,B2M,IGF1,IL15,LILRB4,CYRIB,CARD11
5_Member	GO Biological Processes	GO:0032946	positive regulation of mononuclear cell proliferation	-3.50677	-1.2194		6/144	GPR183,IGF1,IL15,ST6GAL1,IRS2,CARD11
18_Member	GO Biological Processes	GO:0031347	regulation of defense response	-3.50943	-1.2194		13/662	A2M,ALOX5,APOE,C3,CEBPB,HCK,IGF1,IL15,NFE2L2,PAK1,HTRA1,CD226,FOXP1
13_Member	GO Biological Processes	GO:0006897	endocytosis	-3.46969	-1.1898		11/498	ABCA1,APOE,RHOH,CTSL,DOCK1,MRC1,NPC1,ZFYVE9,RAMP1,LILRB4,FCHO2
6_Member	KEGG Pathway	hsa05414	Dilated cardiomyopathy	-3.44399	-1.1678		5/96	CACNA1D,CACNB2,CACNB4,IGF1,ITGB5
16_Member	KEGG Pathway	hsa04666	Fc gamma R-mediated phagocytosis	-3.42321	-1.15068		5/97	DOCK1,HCK,PAK1,AKT3,SCIN
4_Member	GO Biological Processes	GO:0015914	phospholipid transport	-3.40266	-1.15044		5/98	ABCA1,APOC1,APOE,ABCG1,ATP8B4
4_Member	GO Biological Processes	GO:0034377	plasma lipoprotein particle assembly	-3.40263	-1.15044		3/23	ABCA1,APOC1,APOE
4_Member	GO Biological Processes	GO:0097006	regulation of plasma lipoprotein particle levels	-3.39471	-1.15044		4/55	ABCA1,APOC1,APOE,ABCG1
11_Member	GO Biological Processes	GO:0110053	regulation of actin filament organization	-3.41866	-1.15044		8/276	HCK,PAK1,SLIT2,MTSS1,CYFIP1,CYRIB,CGNL1,SCIN
19_Member	GO Biological Processes	GO:0006935	chemotaxis	-3.41156	-1.15044		11/506	ALOX5,RHOH,LYST,DSCAM,GPR183,PLAUR,PTPRM,ROBO1,CXCR4,SLIT2,CYFIP1
19_Member	GO Biological Processes	GO:0042330	taxis	-3.39722	-1.15044		11/508	ALOX5,RHOH,LYST,DSCAM,GPR183,PLAUR,PTPRM,ROBO1,CXCR4,SLIT2,CYFIP1
2_Member	Reactome Gene Sets	R-HSA-6799198	Complex I biogenesis	-3.33518	-1.11744		4/57	ND1,ND2,ND3,ND4
4_Member	GO Biological Processes	GO:0032366	intracellular sterol transport	-3.34665	-1.11744		3/24	ABCA1,NPC1,ABCG1
7_Member	GO Biological Processes	GO:0002252	immune effector process	-3.34277	-1.11744		10/434	B2M,C3,LYST,GPR183,HCK,ITGAL,PAK1,DYSF,FOXP1,APBB1IP
11_Member	GO Biological Processes	GO:0051058	negative regulation of small GTPase mediated signal transduction	-3.33518	-1.11744		4/57	SLIT2,CYRIB,HEG1,CGNL1
15_Member	GO Biological Processes	GO:0040017	positive regulation of locomotion	-3.35542	-1.11744		12/599	DOCK1,DSCAM,IGF1,CD99,NFE2L2,ROR2,PAK1,CXCR4,IRS2,SLIT2,AKT3,FOXP1
17_Member	GO Biological Processes	GO:0006123	mitochondrial electron transport, cytochrome c to oxygen	-3.34665	-1.11744		3/24	COX1,COX2,COX3
17_Member	KEGG Pathway	hsa04932	Non-alcoholic fatty liver disease	-3.33636	-1.11744		6/155	COX1,COX2,COX3,CYTB,IRS2,AKT3
18_Member	GO Biological Processes	GO:0002831	regulation of response to biotic stimulus	-3.3548	-1.11744		9/355	A2M,APOE,HCK,IL15,NFE2L2,PAK1,HTRA1,CD226,FOXP1
4_Member	GO Biological Processes	GO:0015850	organic hydroxy compound transport	-3.32157	-1.10704		6/156	ABCA1,APOC1,APOE,NPC1,ABCG1,ABCC4
2_Member	KEGG Pathway	hsa05014	Amyotrophic lateral sclerosis	-3.27672	-1.09891		9/364	COX1,COX2,COX3,CYTB,ND1,ND2,ND3,ND4,SRSF7
3_Member	Reactome Gene Sets	R-HSA-9664407	Parasite infection	-3.2779	-1.09891		4/59	DOCK1,HCK,CYFIP1,WIPF3
3_Member	Reactome Gene Sets	R-HSA-9664417	Leishmania phagocytosis	-3.2779	-1.09891		4/59	DOCK1,HCK,CYFIP1,WIPF3
3_Member	Reactome Gene Sets	R-HSA-9664422	FCGR3A-mediated phagocytosis	-3.2779	-1.09891		4/59	DOCK1,HCK,CYFIP1,WIPF3
5_Member	GO Biological Processes	GO:0002696	positive regulation of leukocyte activation	-3.2889	-1.09891		10/441	RHOH,B2M,GPR183,IGF1,IL15,IRS2,CD226,LILRB4,CYRIB,CARD11
5_Member	GO Biological Processes	GO:0050863	regulation of T cell activation	-3.27672	-1.09891		9/364	RHOH,B2M,CEBPB,IGF1,IL15,LILRB4,TNFRSF21,CYRIB,CARD11
13_Member	GO Biological Processes	GO:0006898	receptor-mediated endocytosis	-3.3069	-1.09891		6/157	APOE,CTSL,MRC1,RAMP1,LILRB4,FCHO2
16_Member	WikiPathways	WP185	Integrin-mediated cell adhesion	-3.28417	-1.09891		5/104	DOCK1,ITGAL,ITGB5,PAK1,AKT3
20_Member	GO Biological Processes	GO:0036336	dendritic cell migration	-3.29314	-1.09891		3/25	ALOX5,GPR183,CXCR4
17_Member	WikiPathways	WP4396	Nonalcoholic fatty liver disease	-3.26351	-1.08862		6/160	COX1,COX2,COX3,CYTB,IRS2,AKT3
3_Member	Reactome Gene Sets	R-HSA-194315	Signaling by Rho GTPases	-3.24111	-1.08337		13/707	RHOH,DOCK1,DOCK3,PAK1,CDC42BPA,SRGAP3,IQGAP2,CYFIP1,MCF2L,PLEKHG1,ARAP2,CPNE8,WIPF3
4_Member	GO Biological Processes	GO:0065005	protein-lipid complex assembly	-3.2419	-1.08337		3/26	ABCA1,APOC1,APOE
10_Member	GO Biological Processes	GO:0003279	cardiac septum development	-3.24638	-1.08337		5/106	BMPR1A,NDST1,ROBO1,SLIT2,HEG1
13_Member	GO Biological Processes	GO:0046718	viral entry into host cell	-3.24638	-1.08337		5/106	CTSL,ITGB5,MRC1,NPC1,CXCR4
6_Member	KEGG Pathway	hsa04010	MAPK signaling pathway	-3.23786	-1.08291		8/294	CACNA1A,CACNA1D,CACNB2,CACNB4,IGF1,PAK1,RPS6KA3,AKT3
3_Member	Reactome Gene Sets	R-HSA-2029482	Regulation of actin dynamics for phagocytic cup formation	-3.22273	-1.07056		4/61	DOCK1,PAK1,CYFIP1,WIPF3
13_Member	GO Biological Processes	GO:0044409	entry into host	-3.2094	-1.06044		5/108	CTSL,ITGB5,MRC1,NPC1,CXCR4
1_Member	GO Biological Processes	GO:0046579	positive regulation of Ras protein signal transduction	-3.19589	-1.05687		4/62	IGF1,ROBO1,MCF2L,P2RY8
2_Member	WikiPathways	WP623	Oxidative phosphorylation	-3.19589	-1.05687		4/62	ND1,ND2,ND3,ND4
4_Member	GO Biological Processes	GO:0010875	positive regulation of cholesterol efflux	-3.19276	-1.05687		3/27	ABCA1,APOE,ABCG1
4_Member	Reactome Gene Sets	R-HSA-9006931	Signaling by Nuclear Receptors	-3.19007	-1.05684		8/299	ABCA1,APOC1,APOE,FKBP5,GNG7,ABCG1,AKT3,ARL4C
20_Member	GO Biological Processes	GO:0071674	mononuclear cell migration	-3.17319	-1.0426		5/110	ALOX5,GPR183,ITGAL,CD99,CXCR4
5_Member	GO Biological Processes	GO:0050867	positive regulation of cell activation	-3.16264	-1.03468		10/458	RHOH,B2M,GPR183,IGF1,IL15,IRS2,CD226,LILRB4,CYRIB,CARD11
2_Member	GO Biological Processes	GO:0042776	proton motive force-driven mitochondrial ATP synthesis	-3.14361	-1.03359		4/64	ND1,ND2,ND3,ND4
3_Member	Reactome Gene Sets	R-HSA-9716542	Signaling by Rho GTPases, Miro GTPases and RHOBTB3	-3.15145	-1.03359		13/723	RHOH,DOCK1,DOCK3,PAK1,CDC42BPA,SRGAP3,IQGAP2,CYFIP1,MCF2L,PLEKHG1,ARAP2,CPNE8,WIPF3
4_Member	GO Biological Processes	GO:1905953	negative regulation of lipid localization	-3.14361	-1.03359		4/64	ABCA1,APOC1,IRS2,ABCG1
5_Member	GO Biological Processes	GO:0030888	regulation of B cell proliferation	-3.14361	-1.03359		4/64	GPR183,IRS2,TNFRSF21,CARD11
6_Member	Reactome Gene Sets	R-HSA-400042	Adrenaline,noradrenaline inhibits insulin secretion	-3.14555	-1.03359		3/28	CACNA1D,CACNB2,GNG7
17_Member	Reactome Gene Sets	R-HSA-9707564	Cytoprotection by HMOX1	-3.14361	-1.03359		4/64	COX1,COX2,COX3,NFE2L2
11_Member	GO Biological Processes	GO:1902903	regulation of supramolecular fiber organization	-3.1358	-1.02961		9/381	APOE,HCK,PAK1,SLIT2,MTSS1,CYFIP1,CYRIB,CGNL1,SCIN
6_Member	KEGG Pathway	hsa04725	Cholinergic synapse	-3.12027	-1.02535		5/113	CACNA1A,CACNA1D,GNG7,KCNQ3,AKT3
8_Member	GO Biological Processes	GO:1902105	regulation of leukocyte differentiation	-3.12482	-1.02535		8/306	RHOH,CEBPB,IL15,ROR2,LILRB4,FOXP1,TMEM176B,CARD11
4_Member	GO Biological Processes	GO:0034368	protein-lipid complex remodeling	-3.10013	-1.02157		3/29	APOC1,APOE,ABCG1
4_Member	GO Biological Processes	GO:0034369	plasma lipoprotein particle remodeling	-3.10013	-1.02157		3/29	APOC1,APOE,ABCG1
20_Member	GO Biological Processes	GO:0072678	T cell migration	-3.10013	-1.02157		3/29	GPR183,ITGAL,CD99
5_Member	GO Biological Processes	GO:0051249	regulation of lymphocyte activation	-3.06804	-0.99413		11/557	RHOH,B2M,CEBPB,GPR183,IGF1,IL15,IRS2,LILRB4,TNFRSF21,CYRIB,CARD11
5_Member	GO Biological Processes	GO:0042129	regulation of T cell proliferation	-3.06005	-0.990732		6/175	CEBPB,IGF1,IL15,LILRB4,TNFRSF21,CARD11
11_Member	GO Biological Processes	GO:1902905	positive regulation of supramolecular fiber organization	-3.06005	-0.990732		6/175	APOE,HCK,PAK1,MTSS1,CYFIP1,SCIN
5_Member	GO Biological Processes	GO:0051251	positive regulation of lymphocyte activation	-3.05665	-0.989609		9/391	RHOH,B2M,GPR183,IGF1,IL15,IRS2,LILRB4,CYRIB,CARD11
5_Member	GO Biological Processes	GO:0050870	positive regulation of T cell activation	-3.03891	-0.974139		7/243	RHOH,B2M,IGF1,IL15,LILRB4,CYRIB,CARD11
2_Member	KEGG Pathway	hsa05022	Pathways of neurodegeneration - multiple diseases	-3.03558	-0.973146		10/476	SLC25A6,CACNA1D,COX1,COX2,COX3,CYTB,ND1,ND2,ND3,ND4
2_Member	GO Biological Processes	GO:0006091	generation of precursor metabolites and energy	-3.03341	-0.973146		9/394	COX1,COX2,COX3,CYTB,ND1,ND2,ND3,ND4,PFKP
5_Member	GO Biological Processes	GO:0002694	regulation of leukocyte activation	-3.02298	-0.964941		12/654	RHOH,B2M,CEBPB,GPR183,IGF1,IL15,IRS2,CD226,LILRB4,TNFRSF21,CYRIB,CARD11
4_Member	GO Biological Processes	GO:0034367	protein-containing complex remodeling	-3.01418	-0.962776		3/31	APOC1,APOE,ABCG1
1_Member	GO Biological Processes	GO:0051057	positive regulation of small GTPase mediated signal transduction	-2.99705	-0.956474		4/70	IGF1,ROBO1,MCF2L,P2RY8
6_Member	WikiPathways	WP382	MAPK signaling pathway	-2.97747	-0.939032		7/249	CACNA1A,CACNA1D,CACNB2,CACNB4,PAK1,RPS6KA3,AKT3
16_Member	Reactome Gene Sets	R-HSA-397795	G-protein beta:gamma signalling	-2.97344	-0.937118		3/32	GNG7,PAK1,AKT3
4_Member	GO Biological Processes	GO:1905952	regulation of lipid localization	-2.95982	-0.925614		6/183	ABCA1,APOC1,APOE,C3,IRS2,ABCG1
7_Member	GO Biological Processes	GO:0002286	T cell activation involved in immune response	-2.95128	-0.919179		4/72	GPR183,ITGAL,FOXP1,APBB1IP
4_Member	GO Biological Processes	GO:0045940	positive regulation of steroid metabolic process	-2.93405	-0.910259		3/33	APOC1,APOE,ABCG1
4_Member	WikiPathways	WP430	Statin inhibition of cholesterol production	-2.93405	-0.910259		3/33	ABCA1,APOC1,APOE
2_Member	GO Biological Processes	GO:0015986	proton motive force-driven ATP synthesis	-2.92892	-0.909999		4/73	ND1,ND2,ND3,ND4
3_Member	Reactome Gene Sets	R-HSA-9658195	Leishmania infection	-2.92766	-0.909999		7/254	C3,DOCK1,GNG7,HCK,RAMP1,CYFIP1,WIPF3
10_Member	GO Biological Processes	GO:0003281	ventricular septum development	-2.92892	-0.909999		4/73	BMPR1A,ROBO1,SLIT2,HEG1
1_Member	GO Biological Processes	GO:0035025	positive regulation of Rho protein signal transduction	-2.89593	-0.884323		3/34	ROBO1,MCF2L,P2RY8
7_Member	GO Biological Processes	GO:0030098	lymphocyte differentiation	-2.89835	-0.884323		7/257	RHOH,B2M,CTSL,GPR183,IL15,FOXP1,CARD11
10_Member	GO Biological Processes	GO:0040013	negative regulation of locomotion	-2.88425	-0.874638		9/414	APOE,BMPR1A,NFE2L2,PTPRM,ROBO1,ST6GAL1,RECK,SLIT2,SRGAP3
19_Member	GO Biological Processes	GO:0060284	regulation of cell development	-2.86946	-0.863813		10/501	B2M,BMPR1A,DOCK1,DSCAM,IGF1,ROBO1,CXCR4,RECK,SLIT2,CYFIP1
6_Member	WikiPathways	WP2118	Arrhythmogenic right ventricular cardiomyopathy	-2.86386	-0.863096		4/76	CACNA1D,CACNB2,CACNB4,ITGB5
9_Member	Reactome Gene Sets	R-HSA-114608	Platelet degranulation	-2.86286	-0.863096		5/129	A2M,IGF1,ABCC4,MMRN1,CYRIB
4_Member	GO Biological Processes	GO:0071402	cellular response to lipoprotein particle stimulus	-2.85902	-0.861197		3/35	ABCA1,NPC1,ABCG1
6_Member	KEGG Pathway	hsa05412	Arrhythmogenic right ventricular cardiomyopathy	-2.84281	-0.85275		4/77	CACNA1D,CACNB2,CACNB4,ITGB5
9_Member	Reactome Gene Sets	R-HSA-76002	Platelet activation, signaling and aggregation	-2.84099	-0.85275		7/263	A2M,GNG7,IGF1,ABCC4,MMRN1,CYRIB,APBB1IP
19_Member	GO Biological Processes	GO:0050772	positive regulation of axonogenesis	-2.84281	-0.85275		4/77	DSCAM,ROBO1,SLIT2,CYFIP1
6_Member	Reactome Gene Sets	R-HSA-422356	Regulation of insulin secretion	-2.82206	-0.841345		4/78	CACNA1A,CACNA1D,CACNB2,GNG7
15_Member	GO Biological Processes	GO:0010827	regulation of glucose transmembrane transport	-2.82206	-0.841345		4/78	C3,IGF1,NFE2L2,IRS2
17_Member	WikiPathways	WP4922	Mitochondrial complex IV assembly	-2.82323	-0.841345		3/36	COX1,COX2,COX3
19_Member	GO Biological Processes	GO:0031346	positive regulation of cell projection organization	-2.81683	-0.837973		8/342	APOE,DSCAM,NFE2L2,ROR2,ROBO1,SLIT2,CYFIP1,ZNF804A
4_Member	Reactome Gene Sets	R-HSA-8964043	Plasma lipoprotein clearance	-2.78851	-0.818841		3/37	APOC1,APOE,NPC1
6_Member	GO Biological Processes	GO:0043269	regulation of ion transport	-2.79465	-0.818841		12/696	B2M,CACNA1A,CACNA1D,CACNB2,CACNB4,CEBPB,KCNQ3,UTRN,CXCR4,KCNIP1,SESTD1,SLC43A2
9_Member	Reactome Gene Sets	R-HSA-76005	Response to elevated platelet cytosolic Ca2+	-2.78994	-0.818841		5/134	A2M,IGF1,ABCC4,MMRN1,CYRIB
15_Member	GO Biological Processes	GO:0046326	positive regulation of glucose import	-2.78851	-0.818841		3/37	IGF1,NFE2L2,IRS2
4_Member	GO Biological Processes	GO:0032371	regulation of sterol transport	-2.78145	-0.816826		4/80	ABCA1,APOC1,APOE,ABCG1
4_Member	GO Biological Processes	GO:0032374	regulation of cholesterol transport	-2.78145	-0.816826		4/80	ABCA1,APOC1,APOE,ABCG1
7_Member	GO Biological Processes	GO:0002520	immune system development	-2.77911	-0.816826		12/699	RHOH,B2M,CEBPB,CTSL,GPR183,EML1,IL15,MEIS1,SGPL1,LILRB4,FOXP1,CARD11
7_Member	GO Biological Processes	GO:0030097	hemopoiesis	-2.77648	-0.816826		11/606	RHOH,B2M,CEBPB,CTSL,GPR183,EML1,IL15,MEIS1,SGPL1,FOXP1,CARD11
13_Member	GO Biological Processes	GO:0052126	movement in host environment	-2.77573	-0.816826		5/135	CTSL,ITGB5,MRC1,NPC1,CXCR4
11_Member	GO Biological Processes	GO:0032271	regulation of protein polymerization	-2.76326	-0.806129		6/200	HCK,PAK1,SLIT2,CYFIP1,CYRIB,SCIN
4_Member	GO Biological Processes	GO:0032365	intracellular lipid transport	-2.7548	-0.799426		3/38	ABCA1,NPC1,ABCG1
15_Member	Reactome Gene Sets	R-HSA-9006934	Signaling by Receptor Tyrosine Kinases	-2.74451	-0.790894		10/521	APOE,DOCK1,DOCK3,IGF1,PAK1,RPS6KA3,IRS2,AKT3,CYFIP1,RBFOX2
16_Member	WikiPathways	WP306	Focal adhesion	-2.74147	-0.789603		6/202	DOCK1,HCK,IGF1,ITGB5,PAK1,AKT3
4_Member	GO Biological Processes	GO:0032373	positive regulation of sterol transport	-2.72204	-0.780509		3/39	ABCA1,APOE,ABCG1
4_Member	GO Biological Processes	GO:0032376	positive regulation of cholesterol transport	-2.72204	-0.780509		3/39	ABCA1,APOE,ABCG1
10_Member	GO Biological Processes	GO:0014912	negative regulation of smooth muscle cell migration	-2.72204	-0.780509		3/39	BMPR1A,NFE2L2,SLIT2
11_Member	GO Biological Processes	GO:0030833	regulation of actin filament polymerization	-2.72012	-0.780289		5/139	HCK,SLIT2,CYFIP1,CYRIB,SCIN
16_Member	KEGG Pathway	hsa05205	Proteoglycans in cancer	-2.70928	-0.771139		6/205	CTSL,IGF1,ITGB5,PAK1,PLAUR,AKT3
10_Member	GO Biological Processes	GO:0014910	regulation of smooth muscle cell migration	-2.70355	-0.7671		4/84	BMPR1A,IGF1,NFE2L2,SLIT2
2_Member	GO Biological Processes	GO:0006754	ATP biosynthetic process	-2.68473	-0.754426		4/85	ND1,ND2,ND3,ND4
11_Member	GO Biological Processes	GO:0032535	regulation of cellular component size	-2.68556	-0.754426		8/359	APOE,DSCAM,HCK,SLIT2,AKT3,CYFIP1,CYRIB,SCIN
19_Member	GO Biological Processes	GO:0051960	regulation of nervous system development	-2.6842	-0.754426		9/443	B2M,BMPR1A,DSCAM,GRID2,ROBO1,CXCR4,SLIT2,CYFIP1,TNFRSF21
5_Member	GO Biological Processes	GO:0050671	positive regulation of lymphocyte proliferation	-2.67963	-0.751514		5/142	GPR183,IGF1,IL15,IRS2,CARD11
19_Member	GO Biological Processes	GO:0120035	regulation of plasma membrane bounded cell projection organization	-2.67223	-0.747406		11/625	APOE,B2M,DSCAM,GRID2,NFE2L2,ROR2,PAK1,ROBO1,SLIT2,CYFIP1,ZNF804A
7_Member	GO Biological Processes	GO:0043367	CD4-positive, alpha-beta T cell differentiation	-2.65918	-0.740863		3/41	CTSL,GPR183,FOXP1
10_Member	GO Biological Processes	GO:0030336	negative regulation of cell migration	-2.64849	-0.732728		8/364	APOE,BMPR1A,NFE2L2,PTPRM,ROBO1,RECK,SLIT2,SRGAP3
17_Member	Reactome Gene Sets	R-HSA-5628897	TP53 Regulates Metabolic Genes	-2.64783	-0.732728		4/87	COX1,COX2,COX3,AKT3
5_Member	GO Biological Processes	GO:0030890	positive regulation of B cell proliferation	-2.629	-0.72653		3/42	GPR183,IRS2,CARD11
6_Member	Reactome Gene Sets	R-HSA-419037	NCAM1 interactions	-2.629	-0.72653		3/42	CACNA1D,CACNB2,CACNB4
7_Member	GO Biological Processes	GO:0045058	T cell selection	-2.629	-0.72653		3/42	CTSL,IL15,CARD11
10_Member	GO Biological Processes	GO:0060412	ventricular septum morphogenesis	-2.629	-0.72653		3/42	BMPR1A,ROBO1,SLIT2
16_Member	Reactome Gene Sets	R-HSA-9013404	RAC2 GTPase cycle	-2.62974	-0.72653		4/88	DOCK1,DOCK3,PAK1,CYFIP1
10_Member	GO Biological Processes	GO:0010632	regulation of epithelial cell migration	-2.60182	-0.703994		7/290	APOE,DOCK1,NFE2L2,PTPRM,SLIT2,AKT3,FOXP1
13_Member	GO Biological Processes	GO:0051701	biological process involved in interaction with host	-2.58895	-0.692665		5/149	CTSL,ITGB5,MRC1,NPC1,CXCR4
19_Member	GO Biological Processes	GO:0031344	regulation of cell projection organization	-2.58274	-0.687987		11/642	APOE,B2M,DSCAM,GRID2,NFE2L2,ROR2,PAK1,ROBO1,SLIT2,CYFIP1,ZNF804A
2_Member	CORUM	CORUM:178	Respiratory chain complex I (holoenzyme), mitochondrial	-2.57092	-0.682238		3/44	ND1,ND2,ND3
7_Member	GO Biological Processes	GO:1903131	mononuclear cell differentiation	-2.56063	-0.673452		7/295	RHOH,B2M,CTSL,GPR183,IL15,FOXP1,CARD11
19_Member	GO Biological Processes	GO:0010976	positive regulation of neuron projection development	-2.55162	-0.665946		5/152	APOE,NFE2L2,ROR2,CYFIP1,ZNF804A
10_Member	GO Biological Processes	GO:2000146	negative regulation of cell motility	-2.54119	-0.659987		8/379	APOE,BMPR1A,NFE2L2,PTPRM,ROBO1,RECK,SLIT2,SRGAP3
4_Member	GO Biological Processes	GO:0032368	regulation of lipid transport	-2.53937	-0.659645		5/153	ABCA1,APOC1,APOE,IRS2,ABCG1
19_Member	GO Biological Processes	GO:0050770	regulation of axonogenesis	-2.52721	-0.648966		5/154	DSCAM,PAK1,ROBO1,SLIT2,CYFIP1
6_Member	KEGG Pathway	hsa04930	Type II diabetes mellitus	-2.51566	-0.644127		3/46	CACNA1A,CACNA1D,IRS2
7_Member	GO Biological Processes	GO:0048534	hematopoietic or lymphoid organ development	-2.5166	-0.644127		11/655	RHOH,B2M,CEBPB,CTSL,GPR183,EML1,IL15,MEIS1,SGPL1,FOXP1,CARD11
7_Member	GO Biological Processes	GO:0035710	CD4-positive, alpha-beta T cell activation	-2.51566	-0.644127		3/46	CTSL,GPR183,FOXP1
15_Member	GO Biological Processes	GO:0030335	positive regulation of cell migration	-2.51906	-0.644127		10/560	DOCK1,IGF1,CD99,NFE2L2,ROR2,PAK1,CXCR4,IRS2,AKT3,FOXP1
2_Member	GO Biological Processes	GO:0009206	purine ribonucleoside triphosphate biosynthetic process	-2.49293	-0.623426		4/96	ND1,ND2,ND3,ND4
19_Member	GO Biological Processes	GO:0007411	axon guidance	-2.48956	-0.621499		6/227	RHOH,DSCAM,PTPRM,ROBO1,SLIT2,CYFIP1
10_Member	GO Biological Processes	GO:0051271	negative regulation of cellular component movement	-2.48625	-0.61962		8/387	APOE,BMPR1A,NFE2L2,PTPRM,ROBO1,RECK,SLIT2,SRGAP3
2_Member	GO Biological Processes	GO:0009145	purine nucleoside triphosphate biosynthetic process	-2.47675	-0.617229		4/97	ND1,ND2,ND3,ND4
10_Member	GO Biological Processes	GO:0060840	artery development	-2.47675	-0.617229		4/97	APOE,BMPR1A,NDST1,ROBO1
11_Member	GO Biological Processes	GO:0008064	regulation of actin polymerization or depolymerization	-2.47952	-0.617229		5/158	HCK,SLIT2,CYFIP1,CYRIB,SCIN
19_Member	GO Biological Processes	GO:0097485	neuron projection guidance	-2.48021	-0.617229		6/228	RHOH,DSCAM,PTPRM,ROBO1,SLIT2,CYFIP1
3_Member	GO Biological Processes	GO:0022604	regulation of cell morphogenesis	-2.47309	-0.614974		7/306	RHOH,DOCK1,HCK,ST6GAL1,CXCR4,CYFIP1,SHROOM3
11_Member	GO Biological Processes	GO:0030832	regulation of actin filament length	-2.46782	-0.611113		5/159	HCK,SLIT2,CYFIP1,CYRIB,SCIN
10_Member	GO Biological Processes	GO:0010594	regulation of endothelial cell migration	-2.46165	-0.608232		6/230	APOE,NFE2L2,PTPRM,SLIT2,AKT3,FOXP1
15_Member	WikiPathways	WP3932	Focal adhesion: PI3K-Akt-mTOR-signaling pathway	-2.44992	-0.598775		7/309	GNG7,IGF1,IL3RA,ITGAL,ITGB5,IRS2,AKT3
4_Member	GO Biological Processes	GO:0042632	cholesterol homeostasis	-2.44495	-0.59657		4/99	ABCA1,APOE,NPC1,ABCG1
16_Member	Reactome Gene Sets	R-HSA-4420097	VEGFA-VEGFR2 Pathway	-2.44495	-0.59657		4/99	DOCK1,PAK1,AKT3,CYFIP1
14_Member	Reactome Gene Sets	R-HSA-6798695	Neutrophil degranulation	-2.44156	-0.595913		9/482	ALOX5,B2M,C3,ITGAL,PLAUR,IQGAP2,CYFIP1,SLC44A2,ATP8B4
4_Member	GO Biological Processes	GO:0120009	intermembrane lipid transfer	-2.43753	-0.594613		3/49	ABCA1,APOE,ABCG1
4_Member	GO Biological Processes	GO:0055092	sterol homeostasis	-2.42933	-0.587766		4/100	ABCA1,APOE,NPC1,ABCG1
11_Member	GO Biological Processes	GO:1902904	negative regulation of supramolecular fiber organization	-2.4219	-0.581682		5/163	APOE,SLIT2,CYRIB,CGNL1,SCIN
18_Member	GO Biological Processes	GO:0045088	regulation of innate immune response	-2.40717	-0.570978		6/236	A2M,APOE,HCK,NFE2L2,PAK1,CD226
2_Member	GO Biological Processes	GO:0009201	ribonucleoside triphosphate biosynthetic process	-2.39862	-0.567745		4/102	ND1,ND2,ND3,ND4
16_Member	WikiPathways	WP3929	Chemokine signaling pathway	-2.39944	-0.567745		5/165	GNG7,HCK,PAK1,CXCR4,AKT3
15_Member	GO Biological Processes	GO:2000147	positive regulation of cell motility	-2.39109	-0.561536		10/584	DOCK1,IGF1,CD99,NFE2L2,ROR2,PAK1,CXCR4,IRS2,AKT3,FOXP1
15_Member	Canonical Pathways	M7955	SIG INSULIN RECEPTOR PATHWAY IN CARDIAC MYOCYTES	-2.38832	-0.560079		3/51	RPS6KA3,IRS2,AKT3
4_Member	GO Biological Processes	GO:0006869	lipid transport	-2.38213	-0.557801		7/318	ABCA1,APOC1,APOE,NPC1,ABCG1,ABCC4,ATP8B4
5_Member	GO Biological Processes	GO:0008283	cell population proliferation	-2.38368	-0.557801		9/492	CEBPB,EML1,NDST1,IGF1,IL15,SOX5,TGFBI,MTSS1,CARD11
10_Member	GO Biological Processes	GO:0003205	cardiac chamber development	-2.37731	-0.555575		5/167	BMPR1A,NDST1,ROBO1,SLIT2,HEG1
19_Member	GO Biological Processes	GO:0030307	positive regulation of cell growth	-2.36636	-0.547206		5/168	DSCAM,IGF1,RPS6KA3,CXCR4,CYFIP1
4_Member	GO Biological Processes	GO:0010874	regulation of cholesterol efflux	-2.36451	-0.546636		3/52	ABCA1,APOE,ABCG1
11_Member	GO Biological Processes	GO:0043254	regulation of protein-containing complex assembly	-2.35533	-0.540015		8/407	ABCA1,APOE,HCK,PAK1,SLIT2,CYFIP1,CYRIB,SCIN
19_Member	GO Biological Processes	GO:0048639	positive regulation of developmental growth	-2.35549	-0.540015		5/169	BMPR1A,DSCAM,IGF1,CXCR4,CYFIP1
13_Member	Reactome Gene Sets	R-HSA-1236975	Antigen processing-Cross presentation	-2.35383	-0.539787		4/105	B2M,CTSL,ITGB5,MRC1
10_Member	GO Biological Processes	GO:0001525	angiogenesis	-2.34554	-0.532761		7/323	MEIS1,ROBO1,SAT1,TGFBI,RECK,SLIT2,RAMP1
6_Member	GO Biological Processes	GO:0010959	regulation of metal ion transport	-2.33019	-0.523701		8/411	B2M,CACNA1D,CACNB2,CACNB4,UTRN,CXCR4,KCNIP1,SESTD1
13_Member	GO Biological Processes	GO:0044403	biological process involved in symbiotic interaction	-2.32862	-0.523377		6/245	APOE,CTSL,ITGB5,MRC1,NPC1,CXCR4
15_Member	GO Biological Processes	GO:0051272	positive regulation of cellular component movement	-2.3249	-0.5209		10/597	DOCK1,IGF1,CD99,NFE2L2,ROR2,PAK1,CXCR4,IRS2,AKT3,FOXP1
4_Member	GO Biological Processes	GO:0034204	lipid translocation	-2.31836	-0.515599		3/54	ABCA1,ABCG1,ATP8B4
6_Member	GO Biological Processes	GO:0034765	regulation of ion transmembrane transport	-2.31638	-0.51485		9/504	CACNA1A,CACNA1D,CACNB2,CACNB4,KCNQ3,UTRN,KCNIP1,SESTD1,SLC43A2
4_Member	GO Biological Processes	GO:0055088	lipid homeostasis	-2.31279	-0.512657		5/173	ABCA1,APOE,NPC1,IRS2,ABCG1
6_Member	Reactome Gene Sets	R-HSA-163685	Integration of energy metabolism	-2.3105	-0.512657		4/108	CACNA1A,CACNA1D,CACNB2,GNG7
16_Member	Reactome Gene Sets	R-HSA-194138	Signaling by VEGF	-2.3105	-0.512657		4/108	DOCK1,PAK1,AKT3,CYFIP1
19_Member	GO Biological Processes	GO:0048638	regulation of developmental growth	-2.30261	-0.505984		7/329	APOE,BMPR1A,DSCAM,IGF1,CXCR4,SGPL1,CYFIP1
4_Member	GO Biological Processes	GO:0010883	regulation of lipid storage	-2.296	-0.504986		3/55	ABCA1,C3,ABCG1
10_Member	GO Biological Processes	GO:0003179	heart valve morphogenesis	-2.296	-0.504986		3/55	BMPR1A,ROBO1,SLIT2
2_Member	WikiPathways	WP4324	Mitochondrial complex I assembly model OXPHOS system	-2.27407	-0.487861		3/56	ND1,ND2,ND4
2_Member	GO Biological Processes	GO:0009205	purine ribonucleoside triphosphate metabolic process	-2.26854	-0.48632		4/111	ND1,ND2,ND3,ND4
4_Member	GO Biological Processes	GO:1905954	positive regulation of lipid localization	-2.25485	-0.474981		4/112	ABCA1,APOE,C3,ABCG1
7_Member	GO Biological Processes	GO:0002366	leukocyte activation involved in immune response	-2.24087	-0.46334		5/180	GPR183,ITGAL,DYSF,FOXP1,APBB1IP
6_Member	GO Biological Processes	GO:0030001	metal ion transport	-2.23666	-0.460295		10/615	B2M,CACNA1A,CACNA1D,CACNB2,CACNB4,KCNQ3,RAMP1,KCNIP1,TMEM163,SLC9A9
7_Member	GO Biological Processes	GO:0046632	alpha-beta T cell differentiation	-2.23151	-0.459778		3/58	CTSL,GPR183,FOXP1
10_Member	GO Biological Processes	GO:0022029	telencephalon cell migration	-2.23151	-0.459778		3/58	ROBO1,CXCR4,SLIT2
10_Member	GO Biological Processes	GO:0035904	aorta development	-2.23151	-0.459778		3/58	BMPR1A,NDST1,ROBO1
2_Member	GO Biological Processes	GO:0009142	nucleoside triphosphate biosynthetic process	-2.22789	-0.458455		4/114	ND1,ND2,ND3,ND4
20_Member	KEGG Pathway	hsa04670	Leukocyte transendothelial migration	-2.22789	-0.458455		4/114	RHOH,ITGAL,CD99,CXCR4
10_Member	KEGG Pathway	hsa04360	Axon guidance	-2.22095	-0.452658		5/182	PAK1,ROBO1,CXCR4,SLIT2,SRGAP3
2_Member	GO Biological Processes	GO:0010257	NADH dehydrogenase complex assembly	-2.21083	-0.449349		3/59	ND1,ND2,ND4
2_Member	GO Biological Processes	GO:0032981	mitochondrial respiratory chain complex I assembly	-2.21083	-0.449349		3/59	ND1,ND2,ND4
6_Member	KEGG Pathway	hsa04726	Serotonergic synapse	-2.21461	-0.449349		4/115	ALOX5,CACNA1A,CACNA1D,GNG7
10_Member	GO Biological Processes	GO:0002040	sprouting angiogenesis	-2.21083	-0.449349		3/59	ROBO1,RECK,SLIT2
16_Member	Canonical Pathways	M281	PID FAK PATHWAY	-2.21083	-0.449349		3/59	DOCK1,ITGB5,PAK1
2_Member	GO Biological Processes	GO:0009144	purine nucleoside triphosphate metabolic process	-2.20147	-0.442051		4/116	ND1,ND2,ND3,ND4
7_Member	GO Biological Processes	GO:0002263	cell activation involved in immune response	-2.20129	-0.442051		5/184	GPR183,ITGAL,DYSF,FOXP1,APBB1IP
19_Member	GO Biological Processes	GO:0045927	positive regulation of growth	-2.19765	-0.440639		6/261	BMPR1A,DSCAM,IGF1,RPS6KA3,CXCR4,CYFIP1
10_Member	WikiPathways	WP5053	Development of ureteric collection system	-2.19055	-0.440275		3/60	BMPR1A,ROBO1,SLIT2
11_Member	GO Biological Processes	GO:0030837	negative regulation of actin filament polymerization	-2.19055	-0.440275		3/60	SLIT2,CYRIB,SCIN
15_Member	GO Biological Processes	GO:0046324	regulation of glucose import	-2.19055	-0.440275		3/60	IGF1,NFE2L2,IRS2
2_Member	GO Biological Processes	GO:0009199	ribonucleoside triphosphate metabolic process	-2.17558	-0.430658		4/118	ND1,ND2,ND3,ND4
4_Member	GO Biological Processes	GO:0008203	cholesterol metabolic process	-2.17558	-0.430658		4/118	ABCA1,APOE,NPC1,ABCG1
10_Member	GO Biological Processes	GO:0021885	forebrain cell migration	-2.17063	-0.427865		3/61	ROBO1,CXCR4,SLIT2
8_Member	GO Biological Processes	GO:0002761	regulation of myeloid leukocyte differentiation	-2.16283	-0.424357		4/119	CEBPB,ROR2,LILRB4,FOXP1
15_Member	KEGG Pathway	hsa04935	Growth hormone synthesis, secretion and action	-2.16283	-0.424357		4/119	CACNA1D,IGF1,IRS2,AKT3
4_Member	GO Biological Processes	GO:0097035	regulation of membrane lipid distribution	-2.15108	-0.418088		3/62	ABCA1,ABCG1,ATP8B4
15_Member	KEGG Pathway	hsa04213	Longevity regulating pathway - multiple species	-2.15108	-0.418088		3/62	IGF1,IRS2,AKT3
15_Member	KEGG Pathway	hsa04152	AMPK signaling pathway	-2.15021	-0.418088		4/120	IGF1,PFKP,IRS2,AKT3
16_Member	Reactome Gene Sets	R-HSA-388396	GPCR downstream signalling	-2.15215	-0.418088		10/633	C3,GPR183,GNG7,PAK1,RGS16,RPS6KA3,CXCR4,AKT3,RAMP1,MCF2L
2_Member	GO Biological Processes	GO:0009150	purine ribonucleotide metabolic process	-2.14074	-0.411762		7/353	ND1,ND2,ND3,ND4,PDE9A,PFKP,CARD11
4_Member	GO Biological Processes	GO:0010876	lipid localization	-2.14074	-0.411762		7/353	ABCA1,APOC1,APOE,NPC1,ABCG1,ABCC4,ATP8B4
18_Member	GO Biological Processes	GO:0031348	negative regulation of defense response	-2.13596	-0.408024		6/269	A2M,ALOX5,APOE,HCK,IGF1,HTRA1
6_Member	Reactome Gene Sets	R-HSA-375165	NCAM signaling for neurite out-growth	-2.13188	-0.407054		3/63	CACNA1D,CACNB2,CACNB4
19_Member	GO Biological Processes	GO:0051962	positive regulation of nervous system development	-2.12841	-0.404626		6/270	DSCAM,GRID2,ROBO1,CXCR4,SLIT2,CYFIP1
16_Member	KEGG Pathway	hsa04062	Chemokine signaling pathway	-2.12522	-0.404516		5/192	GNG7,HCK,PAK1,CXCR4,AKT3
19_Member	GO Biological Processes	GO:0031175	neuron projection development	-2.11574	-0.396055		10/641	APOE,RHOH,DSCAM,PAK1,PTPRM,ROBO1,SLIT2,CYFIP1,RBFOX2,TNFRSF21
7_Member	GO Biological Processes	GO:0002521	leukocyte differentiation	-2.10887	-0.392243		7/358	RHOH,B2M,CTSL,GPR183,IL15,FOXP1,CARD11
11_Member	GO Biological Processes	GO:0051495	positive regulation of cytoskeleton organization	-2.10682	-0.392212		5/194	HCK,PAK1,MTSS1,CYFIP1,SCIN
17_Member	Reactome Gene Sets	R-HSA-9711123	Cellular response to chemical stress	-2.10682	-0.392212		5/194	COX1,COX2,COX3,NFE2L2,AKT3
7_Member	GO Biological Processes	GO:0002285	lymphocyte activation involved in immune response	-2.10092	-0.387325		4/124	GPR183,ITGAL,FOXP1,APBB1IP
10_Member	GO Biological Processes	GO:0003170	heart valve development	-2.09448	-0.383894		3/65	BMPR1A,ROBO1,SLIT2
19_Member	GO Biological Processes	GO:0048812	neuron projection morphogenesis	-2.07968	-0.372054		8/454	RHOH,DSCAM,PAK1,PTPRM,ROBO1,SLIT2,CYFIP1,RBFOX2
10_Member	GO Biological Processes	GO:0003206	cardiac chamber morphogenesis	-2.07697	-0.371638		4/126	BMPR1A,ROBO1,SLIT2,HEG1
10_Member	GO Biological Processes	GO:0003231	cardiac ventricle development	-2.07697	-0.371638		4/126	BMPR1A,ROBO1,SLIT2,HEG1
19_Member	GO Biological Processes	GO:0050767	regulation of neurogenesis	-2.07141	-0.367782		7/364	B2M,BMPR1A,DSCAM,ROBO1,CXCR4,SLIT2,CYFIP1
2_Member	GO Biological Processes	GO:0006163	purine nucleotide metabolic process	-2.05912	-0.356467		7/366	ND1,ND2,ND3,ND4,PDE9A,PFKP,CARD11
19_Member	GO Biological Processes	GO:0120039	plasma membrane bounded cell projection morphogenesis	-2.05807	-0.356399		8/458	RHOH,DSCAM,PAK1,PTPRM,ROBO1,SLIT2,CYFIP1,RBFOX2
4_Member	GO Biological Processes	GO:1902652	secondary alcohol metabolic process	-2.05348	-0.354248		4/128	ABCA1,APOE,NPC1,ABCG1
2_Member	GO Biological Processes	GO:0009117	nucleotide metabolic process	-2.04736	-0.349597		8/460	ND1,ND2,ND3,ND4,PDE9A,PFKP,ASMTL,CARD11
16_Member	KEGG Pathway	hsa04510	Focal adhesion	-2.04421	-0.347415		5/201	DOCK1,IGF1,ITGB5,PAK1,AKT3
8_Member	GO Biological Processes	GO:0042130	negative regulation of T cell proliferation	-2.04073	-0.34684		3/68	CEBPB,LILRB4,TNFRSF21
16_Member	WikiPathways	WP4685	Melanoma	-2.04073	-0.34684		3/68	DDB2,PAK1,AKT3
19_Member	GO Biological Processes	GO:0048858	cell projection morphogenesis	-2.03672	-0.343789		8/462	RHOH,DSCAM,PAK1,PTPRM,ROBO1,SLIT2,CYFIP1,RBFOX2
2_Member	GO Biological Processes	GO:0009259	ribonucleotide metabolic process	-2.02276	-0.335558		7/372	ND1,ND2,ND3,ND4,PDE9A,PFKP,CARD11
10_Member	GO Biological Processes	GO:0050922	negative regulation of chemotaxis	-2.02341	-0.335558		3/69	ROBO1,ST6GAL1,SLIT2
13_Member	WikiPathways	WP4217	Ebola virus infection in host	-2.01904	-0.333723		4/131	CTSL,NPC1,PAK1,SCIN
15_Member	WikiPathways	WP236	Adipogenesis	-2.01904	-0.333723		4/131	CEBPB,IGF1,MBNL1,IRS2
19_Member	GO Biological Processes	GO:0040008	regulation of growth	-2.01477	-0.330397		10/664	APOE,BMPR1A,DSCAM,IGF1,RPS6KA3,CXCR4,SGPL1,SLIT2,CYFIP1,ZMAT3
6_Member	KEGG Pathway	hsa04728	Dopaminergic synapse	-2.00776	-0.324335		4/132	CACNA1A,CACNA1D,GNG7,AKT3
8_Member	GO Biological Processes	GO:0061515	myeloid cell development	-2.00637	-0.323881		3/70	CEBPB,MEIS1,FOXP1
2_Member	GO Biological Processes	GO:0006753	nucleoside phosphate metabolic process	-2.00519	-0.323641		8/468	ND1,ND2,ND3,ND4,PDE9A,PFKP,ASMTL,CARD11

## Sheet: mLATE_genes
MyList	Gene ID	Type	Tax ID	Homologene Gene ID	Homologene Gene Tax ID	Gene Symbol	Description	Biological Process (GO)	Kinase Class (UniProt)	Protein Function (Protein Atlas)	Subcellular Location (Protein Atlas)	Drug (DrugBank)	Canonical Pathways_x000D_	Hallmark Gene Sets_x000D_	GO:0051056 regulation of small GTPase med	WP111 Electron transport chain: OXPH	R-HSA-9013149 RAC1 GTPase cycle	GO:0033344 cholesterol efflux	GO:0030155 regulation of cell adhesion	hsa04260 Cardiac muscle contraction	GO:0042110 T cell activation	GO:1903706 regulation of hemopoiesis	R-HSA-109582 Hemostasis	R-HSA-428543 Inactivation of CDC42 and RAC1	GO:0032956 regulation of actin cytoskelet	R-HSA-9675108 Nervous system development	GO:0016032 viral process	M169 PID INTEGRIN2 PATHWAY	M295 SIG PIP3 SIGNALING IN CARDIAC	hsa04810 Regulation of actin cytoskelet	CORUM:6442 Cytochrome c oxidase, mitochon	GO:0032102 negative regulation of respons	GO:0050920 regulation of chemotaxis	GO:0050900 leukocyte migration
CSF2RA	1438	symbol	H. sapiens	1438	H. sapiens	CSF2RA	colony stimulating factor 2 receptor subunit alpha	GO:0038157 granulocyte-macrophage colony-stimulating factor signaling pathway;GO:0007259 receptor signaling pathway via JAK-STAT;GO:0097696 receptor signaling pathway via STAT		Human disease related genes:Respiratory diseases:Lung diseases; Predicted secreted proteins; CD markers; Disease related genes; Cancer-related genes:Candidate cancer biomarkers; FDA approved drug targets:Biotech drugs		Sargramostim; KB002; Regramostim; Foreskin fibroblast (neonatal); Foreskin keratinocyte (neonatal); Clove oil	(M118)PID INTEGRIN A9B1 PATHWAY; (M22)PID GMCSF PATHWAY	(M5897)HALLMARK IL6 JAK STAT3 SIGNALING; (M5953)HALLMARK KRAS SIGNALING UP	0.0	0.0	0.0	0.0	1.0	0.0	0.0	0.0	0.0	0.0	0.0	0.0	0.0	0.0	0.0	0.0	0.0	0.0	0.0	0.0
ROBO1	6091	symbol	H. sapiens	6091	H. sapiens	ROBO1	roundabout guidance receptor 1	GO:0021823 cerebral cortex tangential migration using cell-cell interactions;GO:0021825 substrate-dependent cerebral cortex tangential migration;GO:0021827 postnatal olfactory bulb interneuron migration		Predicted intracellular proteins	Plasma membrane (Enhanced)		(M142)PID AJDISS 2PATHWAY		1.0	0.0	0.0	0.0	0.0	0.0	0.0	0.0	0.0	1.0	0.0	1.0	0.0	0.0	0.0	0.0	0.0	1.0	1.0	0.0
CD99	4267	symbol	H. sapiens	4267	H. sapiens	CD99	CD99 molecule (Xg blood group)	GO:2000391 positive regulation of neutrophil extravasation;GO:2000389 regulation of neutrophil extravasation;GO:0072683 T cell extravasation		Predicted intracellular proteins; CD markers	Golgi apparatus (Approved)			(M5915)HALLMARK APICAL JUNCTION	0.0	0.0	0.0	0.0	0.0	0.0	0.0	0.0	1.0	0.0	0.0	0.0	0.0	0.0	1.0	0.0	0.0	0.0	0.0	1.0
DHRSX	207063	symbol	H. sapiens	207063	H. sapiens	DHRSX	dehydrogenase/reductase X-linked	GO:0010508 positive regulation of autophagy;GO:0010506 regulation of autophagy;GO:0031331 positive regulation of cellular catabolic process		Predicted intracellular proteins; Predicted secreted proteins	Cytosol (Uncertain); Additional: Mitotic spindle				0.0	0.0	0.0	0.0	0.0	0.0	0.0	0.0	0.0	0.0	0.0	0.0	0.0	0.0	0.0	0.0	0.0	0.0	0.0	0.0
PTPRM	5797	symbol	H. sapiens	5797	H. sapiens	PTPRM	protein tyrosine phosphatase receptor type M	GO:0031290 retinal ganglion cell axon guidance;GO:0010842 retina layer formation;GO:0060042 retina morphogenesis in camera-type eye		Predicted intracellular proteins; Enzymes; ENZYME proteins:Hydrolases	Plasma membrane (Approved)		(M72)PID NECTIN PATHWAY	(M5942)HALLMARK UV RESPONSE DN	0.0	0.0	0.0	0.0	0.0	0.0	0.0	0.0	0.0	1.0	0.0	0.0	0.0	0.0	0.0	0.0	0.0	0.0	1.0	0.0
ST6GALNAC3	256435	symbol	H. sapiens	256435	H. sapiens	ST6GALNAC3	ST6 N-acetylgalactosaminide alpha-2,6-sialyltransferase 3	GO:0006677 glycosylceramide metabolic process;GO:0001574 ganglioside biosynthetic process;GO:0097503 sialylation		ENZYME proteins:Transferases; Predicted intracellular proteins; Enzymes	Nucleoplasm (Enhanced)				0.0	0.0	0.0	0.0	0.0	0.0	0.0	0.0	0.0	0.0	0.0	0.0	1.0	0.0	0.0	0.0	0.0	0.0	0.0	0.0
SLC25A6	293	symbol	H. sapiens	293	H. sapiens	SLC25A6	solute carrier family 25 member 6	GO:0140021 mitochondrial ADP transmembrane transport;GO:1990544 mitochondrial ATP transmembrane transport;GO:0015866 ADP transport		FDA approved drug targets:Small molecule drugs; Transporters:Electrochemical Potential-driven transporters	Mitochondria (Supported)	Clodronic acid; Etidronic acid		(M5936)HALLMARK OXIDATIVE PHOSPHORYLATION	0.0	1.0	0.0	1.0	0.0	0.0	0.0	0.0	0.0	0.0	0.0	0.0	0.0	0.0	0.0	0.0	0.0	0.0	0.0	0.0
PARD3B	117583	symbol	H. sapiens	117583	H. sapiens	PARD3B	par-3 family cell polarity regulator beta	GO:0051660 establishment of centrosome localization;GO:0051642 centrosome localization;GO:0061842 microtubule organizing center localization		Predicted intracellular proteins	Cell Junctions (Supported)				0.0	0.0	0.0	0.0	0.0	0.0	0.0	0.0	0.0	0.0	0.0	0.0	0.0	0.0	0.0	0.0	0.0	0.0	0.0	0.0
KCNIP1	30820	symbol	H. sapiens	30820	H. sapiens	KCNIP1	potassium voltage-gated channel interacting protein 1	GO:1901379 regulation of potassium ion transmembrane transport;GO:0043266 regulation of potassium ion transport;GO:0071805 potassium ion transmembrane transport		Predicted intracellular proteins; Transporters:Accessory Factors Involved in Transport	Vesicles (Approved)				0.0	0.0	0.0	0.0	0.0	1.0	0.0	0.0	0.0	0.0	0.0	0.0	0.0	0.0	0.0	0.0	0.0	0.0	0.0	0.0
SNTB1	6641	symbol	H. sapiens	6641	H. sapiens	SNTB1	syntrophin beta 1	GO:0006936 muscle contraction;GO:0003012 muscle system process;GO:0003008 system process		Predicted intracellular proteins				(M5930)HALLMARK EPITHELIAL MESENCHYMAL TRANSITION	0.0	0.0	0.0	0.0	0.0	0.0	0.0	0.0	0.0	0.0	0.0	0.0	0.0	0.0	0.0	0.0	0.0	0.0	0.0	0.0
DSCAM	1826	symbol	H. sapiens	1826	H. sapiens	DSCAM	DS cell adhesion molecule	GO:0060060 post-embryonic retina morphogenesis in camera-type eye;GO:0048842 positive regulation of axon extension involved in axon guidance;GO:0038007 netrin-activated signaling pathway			Golgi apparatus (Approved)		(M285)PID HNF3A PATHWAY; (M200)PID ERA GENOMIC PATHWAY		0.0	0.0	0.0	0.0	1.0	0.0	0.0	0.0	0.0	1.0	1.0	1.0	0.0	0.0	1.0	0.0	0.0	0.0	1.0	0.0
APOE	348	symbol	H. sapiens	348	H. sapiens	APOE	apolipoprotein E	GO:0071831 intermediate-density lipoprotein particle clearance;GO:0150200 regulation of transport across blood-brain barrier;GO:0150201 positive regulation of transport across blood-brain barrier		Human disease related genes:Nervous system diseases:Neurodegenerative diseases; Predicted secreted proteins; Human disease related genes:Congenital disorders of metabolism:Other congenital disorders of metabolism; Disease related genes; Candidate cardiovascular disease genes; Human disease related genes:Congenital disorders of metabolism:Congenital disorders of lipid/glycolipid metabolism; Cancer…	Vesicles (Approved)	Zinc; Copper; Zinc acetate; Zinc chloride; Zinc sulfate, unspecified form		(M5905)HALLMARK ADIPOGENESIS; (M5934)HALLMARK XENOBIOTIC METABOLISM	1.0	1.0	0.0	1.0	1.0	0.0	0.0	0.0	0.0	1.0	1.0	0.0	1.0	0.0	1.0	0.0	0.0	1.0	1.0	0.0
MMRN1	22915	symbol	H. sapiens	22915	H. sapiens	MMRN1	multimerin 1	GO:1901731 positive regulation of platelet aggregation;GO:0034112 positive regulation of homotypic cell-cell adhesion;GO:0090330 regulation of platelet aggregation		Disease related genes; Predicted intracellular proteins; Predicted secreted proteins	Endoplasmic reticulum (Approved)		(M3008)NABA ECM GLYCOPROTEINS; (M5884)NABA CORE MATRISOME; (M5889)NABA MATRISOME		0.0	0.0	0.0	0.0	1.0	0.0	0.0	0.0	1.0	0.0	0.0	0.0	0.0	0.0	0.0	0.0	0.0	1.0	0.0	0.0
TMEM176B	28959	symbol	H. sapiens	28959	H. sapiens	TMEM176B	transmembrane protein 176B	GO:2001199 negative regulation of dendritic cell differentiation;GO:2001198 regulation of dendritic cell differentiation;GO:1902106 negative regulation of leukocyte differentiation		Transporters:Transporter channels and pores	Golgi apparatus (Approved); Additional: Nucleoplasm;Plasma membrane			(M5934)HALLMARK XENOBIOTIC METABOLISM; (M5953)HALLMARK KRAS SIGNALING UP	0.0	0.0	0.0	0.0	0.0	0.0	0.0	1.0	0.0	0.0	0.0	0.0	0.0	0.0	0.0	0.0	0.0	0.0	0.0	0.0
APBA2	321	symbol	H. sapiens	321	H. sapiens	APBA2	amyloid beta precursor protein binding family A member 2	GO:0007268 chemical synaptic transmission;GO:0098916 anterograde trans-synaptic signaling;GO:0099537 trans-synaptic signaling		Predicted intracellular proteins; Transporters:Accessory Factors Involved in Transport	Golgi apparatus (Enhanced)				0.0	0.0	0.0	0.0	0.0	0.0	0.0	0.0	0.0	0.0	0.0	0.0	0.0	0.0	0.0	0.0	0.0	0.0	0.0	0.0
IL3RA	3563	symbol	H. sapiens	3563	H. sapiens	IL3RA	interleukin 3 receptor subunit alpha	GO:0038156 interleukin-3-mediated signaling pathway;GO:0036015 response to interleukin-3;GO:0036016 cellular response to interleukin-3		Predicted intracellular proteins; FDA approved drug targets:Biotech drugs; CD markers		Sargramostim; Tagraxofusp	(M182)PID IL3 PATHWAY	(M5897)HALLMARK IL6 JAK STAT3 SIGNALING; (M5947)HALLMARK IL2 STAT5 SIGNALING	0.0	0.0	0.0	0.0	0.0	0.0	0.0	0.0	0.0	0.0	0.0	0.0	0.0	0.0	1.0	0.0	0.0	0.0	0.0	0.0
CACNA1D	776	symbol	H. sapiens	776	H. sapiens	CACNA1D	calcium voltage-gated channel subunit alpha1 D	GO:0086046 membrane depolarization during SA node cell action potential;GO:0086015 SA node cell action potential;GO:0086018 SA node cell to atrial cardiac muscle cell signaling		Voltage-gated ion channels:Voltage-Gated Calcium Channels; Cancer-related genes; Transporters:Transporter channels and pores; Human disease related genes:Endocrine and metabolic diseases:Adrenal gland diseases; Disease related genes; Predicted intracellular proteins; FDA approved drug targets:Small molecule drugs	Nuclear membrane (Approved)	Isradipine; Nimodipine; Nisoldipine; Cinnarizine; Nicardipine; Ethanol; Felodipine; Nitrendipine; Nifedipine; Mibefradil; Dronedarone; Clevidipine; Nilvadipine; Aranidipine; Levamlodipine			0.0	1.0	0.0	0.0	0.0	1.0	0.0	0.0	0.0	0.0	0.0	1.0	0.0	0.0	1.0	0.0	0.0	0.0	0.0	0.0
AKAP17A	8227	symbol	H. sapiens	8227	H. sapiens	AKAP17A	A-kinase anchoring protein 17A	GO:0042113 B cell activation;GO:0043484 regulation of RNA splicing;GO:0008380 RNA splicing		Predicted intracellular proteins	Nuclear speckles (Supported); Additional: Cytosol				0.0	0.0	0.0	0.0	0.0	0.0	1.0	0.0	0.0	0.0	0.0	0.0	0.0	0.0	0.0	0.0	0.0	0.0	0.0	0.0
PAQR5	54852	symbol	H. sapiens	54852	H. sapiens	PAQR5	progestin and adipoQ receptor family member 5	GO:0048477 oogenesis;GO:0007292 female gamete generation;GO:0007281 germ cell development			Vesicles (Approved)				0.0	0.0	0.0	0.0	0.0	0.0	0.0	0.0	0.0	0.0	0.0	0.0	0.0	0.0	0.0	0.0	0.0	0.0	0.0	0.0
GRID2	2895	symbol	H. sapiens	2895	H. sapiens	GRID2	glutamate ionotropic receptor delta type subunit 2	GO:1900454 positive regulation of long-term synaptic depression;GO:0021684 cerebellar granular layer formation;GO:0021707 cerebellar granule cell differentiation		Disease related genes; Human disease related genes:Nervous system diseases:Neurodegenerative diseases; Predicted intracellular proteins				(M5956)HALLMARK KRAS SIGNALING DN	0.0	0.0	0.0	0.0	0.0	0.0	0.0	0.0	0.0	0.0	0.0	0.0	0.0	0.0	0.0	0.0	0.0	1.0	1.0	0.0
ROR2	4920	symbol	H. sapiens	4920	H. sapiens	ROR2	receptor tyrosine kinase like orphan receptor 2	GO:0030538 embryonic genitalia morphogenesis;GO:0007223 Wnt signaling pathway, calcium modulating pathway;GO:1900019 regulation of protein kinase C activity	Tyr protein kinase family	Human disease related genes:Congenital malformations:Other congenital malformations; Human disease related genes:Congenital malformations:Congenital malformations of the musculoskeletal system; ENZYME proteins:Transferases; Disease related genes; Kinases:Tyr protein kinases; Potential drug targets; Enzymes			(M77)PID WNT SIGNALING PATHWAY; (M23)PID WNT NONCANONICAL PATHWAY		0.0	0.0	0.0	0.0	0.0	0.0	0.0	1.0	0.0	0.0	0.0	0.0	0.0	0.0	1.0	0.0	0.0	0.0	1.0	1.0
ST6GAL1	6480	symbol	H. sapiens	6480	H. sapiens	ST6GAL1	ST6 beta-galactoside alpha-2,6-sialyltransferase 1	GO:2000110 negative regulation of macrophage apoptotic process;GO:1990743 protein sialylation;GO:2000109 regulation of macrophage apoptotic process		Predicted secreted proteins; ENZYME proteins:Transferases; Predicted intracellular proteins; Enzymes				(M5953)HALLMARK KRAS SIGNALING UP	0.0	0.0	1.0	0.0	1.0	0.0	0.0	0.0	0.0	1.0	0.0	0.0	1.0	0.0	0.0	0.0	0.0	1.0	1.0	0.0
CDC42BPA	8476	symbol	H. sapiens	8476	H. sapiens	CDC42BPA	CDC42 binding protein kinase alpha	GO:0031532 actin cytoskeleton reorganization;GO:0018107 peptidyl-threonine phosphorylation;GO:0018210 peptidyl-threonine modification	AGC Ser/Thr protein kinase family	ENZYME proteins:Transferases; Predicted intracellular proteins; Enzymes; Kinases:AGC Ser/Thr protein kinases	Intermediate filaments (Approved)		(M81)PID CDC42 PATHWAY	(M5942)HALLMARK UV RESPONSE DN; (M5893)HALLMARK MITOTIC SPINDLE	0.0	0.0	1.0	0.0	0.0	0.0	0.0	0.0	0.0	0.0	0.0	0.0	0.0	0.0	0.0	0.0	0.0	0.0	0.0	0.0
SLC22A23	63027	symbol	H. sapiens	63027	H. sapiens	SLC22A23	solute carrier family 22 member 23	GO:0055085 transmembrane transport;GO:0006811 ion transport;GO:0006810 transport		Transporters:Electrochemical Potential-driven transporters	Nucleoplasm;Vesicles (Approved); Additional: Cytosol				0.0	0.0	0.0	0.0	0.0	0.0	0.0	0.0	0.0	0.0	0.0	0.0	0.0	0.0	0.0	0.0	0.0	0.0	0.0	0.0
MIR3667HG	348645	gene_synonym	H. sapiens	348645	H. sapiens	MIR3667HG	MIR3667 host gene								0.0	0.0	0.0	0.0	0.0	0.0	0.0	0.0	0.0	0.0	0.0	0.0	0.0	0.0	0.0	0.0	0.0	0.0	0.0	0.0
PLCXD3	345557	symbol	H. sapiens	345557	H. sapiens	PLCXD3	phosphatidylinositol specific phospholipase C X domain containing 3	GO:0016042 lipid catabolic process;GO:0006629 lipid metabolic process;GO:1901575 organic substance catabolic process		Predicted intracellular proteins	Golgi apparatus (Approved)				0.0	0.0	0.0	0.0	0.0	0.0	0.0	0.0	0.0	0.0	0.0	0.0	0.0	0.0	0.0	0.0	0.0	0.0	0.0	0.0
GRAMD4	23151	symbol	H. sapiens	23151	H. sapiens	GRAMD4	GRAM domain containing 4	GO:0034164 negative regulation of toll-like receptor 9 signaling pathway;GO:0034163 regulation of toll-like receptor 9 signaling pathway;GO:0034122 negative regulation of toll-like receptor signaling pathway		Predicted intracellular proteins			(M19)PID P73PATHWAY		0.0	0.0	0.0	0.0	0.0	0.0	0.0	0.0	0.0	0.0	0.0	0.0	0.0	0.0	0.0	0.0	0.0	0.0	0.0	0.0
WIPF3	644150	symbol	H. sapiens	644150	H. sapiens	WIPF3	WAS/WASL interacting protein family member 3	GO:0030048 actin filament-based movement;GO:0007283 spermatogenesis;GO:0030029 actin filament-based process		Predicted intracellular proteins	Mitochondria (Uncertain)				0.0	0.0	1.0	0.0	0.0	0.0	0.0	0.0	0.0	0.0	0.0	0.0	0.0	0.0	0.0	0.0	0.0	0.0	0.0	0.0
SHROOM3	57619	symbol	H. sapiens	57619	H. sapiens	SHROOM3	shroom family member 3	GO:0043476 pigment accumulation;GO:0043482 cellular pigment accumulation;GO:0045176 apical protein localization		Predicted intracellular proteins					0.0	0.0	1.0	0.0	0.0	0.0	0.0	0.0	0.0	1.0	0.0	0.0	0.0	0.0	0.0	0.0	0.0	0.0	0.0	0.0
DOCK1	1793	symbol	H. sapiens	1793	H. sapiens	DOCK1	dedicator of cytokinesis 1	GO:1900026 positive regulation of substrate adhesion-dependent cell spreading;GO:1900024 regulation of substrate adhesion-dependent cell spreading;GO:0010770 positive regulation of cell morphogenesis involved in differentiation		Predicted intracellular proteins	Nucleoplasm (Enhanced)		(M108)PID NETRIN PATHWAY; (M277)PID INTEGRIN A4B1 PATHWAY; (M241)PID RAC1 REG PATHWAY		0.0	0.0	1.0	0.0	1.0	0.0	0.0	0.0	1.0	1.0	0.0	1.0	1.0	0.0	1.0	1.0	0.0	0.0	1.0	0.0
CPNE8	144402	symbol	H. sapiens	144402	H. sapiens	CPNE8	copine 8	GO:0071277 cellular response to calcium ion;GO:0051592 response to calcium ion;GO:0071248 cellular response to metal ion		Predicted intracellular proteins					0.0	0.0	1.0	0.0	0.0	0.0	0.0	0.0	0.0	0.0	0.0	0.0	0.0	0.0	0.0	0.0	0.0	0.0	0.0	0.0
IGF1	3479	symbol	H. sapiens	3479	H. sapiens	IGF1	insulin like growth factor 1	GO:0060283 negative regulation of oocyte development;GO:1904073 regulation of trophectodermal cell proliferation;GO:1904075 positive regulation of trophectodermal cell proliferation		RAS pathway related proteins; Human disease related genes:Endocrine and metabolic diseases:Hypothalamus and pituitary gland diseases; Predicted secreted proteins; Disease related genes; Human disease related genes:Cancers:Cancers of the lung and pleura		N,N-Bis(3-(D-gluconamido)propyl)deoxycholamide; N-Dodecyl-N,N-Dimethyl-3-Ammonio-1-Propanesulfonate	(M295)SIG PIP3 SIGNALING IN CARDIAC MYOCTES; (M5883)NABA SECRETED FACTORS; (M5885)NABA MATRISOME ASSOCIATED	(M5909)HALLMARK MYOGENESIS; (M5934)HALLMARK XENOBIOTIC METABOLISM	1.0	0.0	0.0	0.0	1.0	1.0	1.0	0.0	1.0	1.0	0.0	0.0	0.0	0.0	1.0	1.0	0.0	1.0	1.0	0.0
TPRG1	285386	symbol	H. sapiens	285386	H. sapiens	TPRG1	tumor protein p63 regulated 1			Predicted intracellular proteins	Nucleoplasm (Supported)				0.0	0.0	0.0	0.0	0.0	0.0	0.0	0.0	0.0	0.0	0.0	0.0	0.0	0.0	0.0	0.0	0.0	0.0	0.0	0.0
FOXP1	27086	symbol	H. sapiens	27086	H. sapiens	FOXP1	forkhead box P1	GO:0032745 positive regulation of interleukin-21 production;GO:0061470 T follicular helper cell differentiation;GO:1901509 regulation of endothelial tube morphogenesis		Disease related genes; Cancer-related genes; Transcription factors:Helix-turn-helix domains; Predicted intracellular proteins	Nucleoplasm (Supported)				0.0	0.0	0.0	0.0	0.0	0.0	1.0	1.0	0.0	1.0	0.0	0.0	0.0	0.0	1.0	0.0	0.0	1.0	0.0	0.0
APOC1	341	symbol	H. sapiens	341	H. sapiens	APOC1	apolipoprotein C1	GO:0010900 negative regulation of phosphatidylcholine catabolic process;GO:0150174 negative regulation of phosphatidylcholine metabolic process;GO:0010899 regulation of phosphatidylcholine catabolic process		Predicted secreted proteins; Cancer-related genes:Candidate cancer biomarkers; Candidate cardiovascular disease genes				(M5946)HALLMARK COAGULATION; (M5921)HALLMARK COMPLEMENT	0.0	0.0	0.0	1.0	0.0	0.0	0.0	0.0	0.0	0.0	0.0	0.0	0.0	0.0	0.0	0.0	0.0	0.0	0.0	0.0
S100Z	170591	symbol	H. sapiens	170591	H. sapiens	S100Z	S100 calcium binding protein Z	GO:0008150 biological_process		Predicted intracellular proteins	Centrosome;Cytosol (Approved); Additional: Nucleoplasm		(M5883)NABA SECRETED FACTORS; (M5885)NABA MATRISOME ASSOCIATED; (M5889)NABA MATRISOME		0.0	0.0	0.0	0.0	0.0	0.0	0.0	0.0	0.0	0.0	0.0	0.0	0.0	0.0	0.0	0.0	0.0	0.0	0.0	0.0
IPCEF1	26034	symbol	H. sapiens	26034	H. sapiens	IPCEF1	interaction protein for cytohesin exchange factors 1	GO:0015671 oxygen transport;GO:0015669 gas transport;GO:0098869 cellular oxidant detoxification		Predicted intracellular proteins	Nuclear speckles;Plasma membrane (Approved); Additional: Cytoplasmic bodies;Nucleoli		(M12771)SA PTEN PATHWAY; (M86)PID ARF6 PATHWAY	(M5938)HALLMARK REACTIVE OXYGEN SPECIES PATHWAY	0.0	0.0	0.0	0.0	0.0	0.0	0.0	0.0	0.0	0.0	0.0	0.0	0.0	0.0	0.0	0.0	0.0	0.0	0.0	0.0
ADAM28	10863	symbol	H. sapiens	10863	H. sapiens	ADAM28	ADAM metallopeptidase domain 28	GO:0007283 spermatogenesis;GO:0048232 male gamete generation;GO:0007276 gamete generation		Predicted secreted proteins; Transporters:Accessory Factors Involved in Transport	Plasma membrane (Approved); Additional: Mitochondria	N-[(Furan-2-Yl)Carbonyl]-(S)-Leucyl-(R)-[1-Amino-2(1h-Indol-3-Yl)Ethyl]-Phosphonic Acid; Furoyl-Leucine; Ilomastat; 2-(Thiomethylene)-4-Methylpentanoic Acid; Pidolic acid; Batimastat; (2R,3R)-N^1^-[(1S)-2,2-DIMETHYL-1-(METHYLCARBAMOYL)PROPYL]-N^4^-HYDROXY-2-(2-METHYLPROPYL)-3-{[(1,3-THIAZOL-2-YLCARBONYL)AMINO]METHYL}BUTANEDIAMIDE	(M277)PID INTEGRIN A4B1 PATHWAY; (M3468)NABA ECM REGULATORS; (M5885)NABA MATRISOME ASSOCIATED		0.0	0.0	0.0	0.0	0.0	0.0	0.0	0.0	0.0	0.0	0.0	0.0	0.0	0.0	0.0	0.0	0.0	0.0	0.0	0.0
RBFOX2	23543	symbol	H. sapiens	23543	H. sapiens	RBFOX2	RNA binding fox-1 homolog 2	GO:0010724 regulation of definitive erythrocyte differentiation;GO:0021942 radial glia guided migration of Purkinje cell;GO:0021932 hindbrain radial glia guided cell migration		Predicted intracellular proteins	Nucleoplasm (Supported)				0.0	0.0	0.0	0.0	0.0	0.0	0.0	1.0	0.0	0.0	0.0	0.0	0.0	0.0	1.0	0.0	0.0	0.0	1.0	0.0
XACT	105463123	symbol	H. sapiens	105463123	H. sapiens	XACT	X active specific transcript								0.0	0.0	0.0	0.0	0.0	0.0	0.0	0.0	0.0	0.0	0.0	0.0	0.0	0.0	0.0	0.0	0.0	0.0	0.0	0.0
MT-CO3	4514	gene_synonym	H. sapiens	4514	H. sapiens	COX3	cytochrome c oxidase subunit III	GO:0006123 mitochondrial electron transport, cytochrome c to oxygen;GO:0008535 respiratory chain complex IV assembly;GO:0017004 cytochrome complex assembly		Human disease related genes:Nervous system diseases:Neurodegenerative diseases; Disease related genes; ENZYME proteins; Transporters:Primary Active Transporters; Potential drug targets; Enzymes; Human disease related genes:Congenital disorders of metabolism:Mitochondrial diseases		Cholic Acid; N-Formylmethionine			0.0	1.0	0.0	0.0	0.0	1.0	0.0	0.0	0.0	0.0	0.0	0.0	0.0	0.0	0.0	0.0	1.0	0.0	0.0	0.0
IQGAP2	10788	symbol	H. sapiens	10788	H. sapiens	IQGAP2	IQ motif containing GTPase activating protein 2	GO:0070493 thrombin-activated receptor signaling pathway;GO:0034314 Arp2/3 complex-mediated actin nucleation;GO:0045010 actin nucleation		Predicted intracellular proteins	Plasma membrane;Vesicles (Approved)			(M5908)HALLMARK ANDROGEN RESPONSE	0.0	0.0	1.0	0.0	0.0	0.0	0.0	0.0	0.0	0.0	1.0	0.0	0.0	1.0	0.0	1.0	0.0	0.0	0.0	0.0
CA8	767	symbol	H. sapiens	767	H. sapiens	CA8	carbonic anhydrase 8	GO:0006730 one-carbon metabolic process;GO:0048015 phosphatidylinositol-mediated signaling;GO:0048017 inositol lipid-mediated signaling		Disease related genes; Human disease related genes:Nervous system diseases:Neurodegenerative diseases; Predicted intracellular proteins; Cancer-related genes:Candidate cancer biomarkers		Zonisamide			0.0	0.0	0.0	0.0	0.0	0.0	0.0	0.0	0.0	0.0	0.0	0.0	0.0	0.0	0.0	0.0	0.0	0.0	0.0	0.0
ABCA1	19	symbol	H. sapiens	19	H. sapiens	ABCA1	ATP binding cassette subfamily A member 1	GO:0090108 positive regulation of high-density lipoprotein particle assembly;GO:0090107 regulation of high-density lipoprotein particle assembly;GO:0099039 sphingolipid translocation		Predicted intracellular proteins; Disease related genes; ENZYME proteins; Transporters:Primary Active Transporters; Human disease related genes:Cardiovascular diseases:Vascular diseases; Human disease related genes:Congenital disorders of metabolism:Congenital disorders of lipid/glycolipid metabolism; Enzymes; FDA approved drug targets:Small molecule drugs	Nucleoplasm;Vesicles (Approved)	ATP; Glyburide; Probucol	(M162)PID RXR VDR PATHWAY	(M5910)HALLMARK PROTEIN SECRETION; (M5948)HALLMARK BILE ACID METABOLISM; (M5890)HALLMARK TNFA SIGNALING VIA NFKB	1.0	0.0	0.0	1.0	0.0	0.0	0.0	0.0	0.0	0.0	1.0	0.0	1.0	0.0	0.0	0.0	0.0	0.0	0.0	0.0
FCHO2	115548	symbol	H. sapiens	115548	H. sapiens	FCHO2	FCH and mu domain containing endocytic adaptor 2	GO:0048268 clathrin coat assembly;GO:0072583 clathrin-dependent endocytosis;GO:0048488 synaptic vesicle endocytosis		Predicted intracellular proteins	Centrosome (Approved); Additional: Cytosol;Vesicles				0.0	0.0	0.0	0.0	0.0	0.0	0.0	0.0	0.0	0.0	0.0	0.0	1.0	0.0	0.0	0.0	0.0	0.0	0.0	0.0
HS3ST4	9951	symbol	H. sapiens	9951	H. sapiens	HS3ST4	heparan sulfate-glucosamine 3-sulfotransferase 4	GO:0030201 heparan sulfate proteoglycan metabolic process;GO:0006029 proteoglycan metabolic process;GO:0009100 glycoprotein metabolic process		ENZYME proteins:Transferases; Enzymes					0.0	0.0	0.0	0.0	0.0	0.0	0.0	0.0	0.0	0.0	0.0	0.0	0.0	0.0	0.0	0.0	0.0	0.0	0.0	0.0
CYFIP1	23191	symbol	H. sapiens	23191	H. sapiens	CYFIP1	cytoplasmic FMR1 interacting protein 1	GO:1903422 negative regulation of synaptic vesicle recycling;GO:0099578 regulation of translation at postsynapse, modulating synaptic transmission;GO:0140245 regulation of translation at postsynapse		Predicted intracellular proteins				(M5947)HALLMARK IL2 STAT5 SIGNALING	0.0	0.0	1.0	0.0	0.0	0.0	0.0	0.0	0.0	0.0	1.0	0.0	0.0	1.0	1.0	1.0	0.0	0.0	1.0	0.0
RTN1	6252	symbol	H. sapiens	6252	H. sapiens	RTN1	reticulon 1	GO:1902430 negative regulation of amyloid-beta formation;GO:1902992 negative regulation of amyloid precursor protein catabolic process;GO:1902003 regulation of amyloid-beta formation		Transporters:Accessory Factors Involved in Transport	Endoplasmic reticulum (Supported); Additional: Nuclear bodies			(M5919)HALLMARK HEDGEHOG SIGNALING	0.0	0.0	0.0	0.0	0.0	0.0	0.0	0.0	0.0	0.0	0.0	0.0	0.0	0.0	0.0	0.0	0.0	0.0	0.0	0.0
NHSL1	57224	symbol	H. sapiens	57224	H. sapiens	NHSL1	NHS like 1	GO:0030154 cell differentiation;GO:0048869 cellular developmental process;GO:0032502 developmental process		Predicted intracellular proteins	Nuclear membrane (Approved); Additional: Nucleoplasm				0.0	0.0	0.0	0.0	0.0	0.0	0.0	0.0	0.0	0.0	0.0	0.0	0.0	0.0	0.0	0.0	0.0	0.0	0.0	0.0
FAM149A	25854	symbol	H. sapiens	25854	H. sapiens	FAM149A	family with sequence similarity 149 member A			Predicted intracellular proteins	Golgi apparatus (Approved)				0.0	0.0	0.0	0.0	0.0	0.0	0.0	0.0	0.0	0.0	0.0	0.0	0.0	0.0	0.0	0.0	0.0	0.0	0.0	0.0
KCNQ3	3786	symbol	H. sapiens	3786	H. sapiens	KCNQ3	potassium voltage-gated channel subfamily Q member 3	GO:0060081 membrane hyperpolarization;GO:0071805 potassium ion transmembrane transport;GO:0006813 potassium ion transport		Human disease related genes:Nervous system diseases:Epilepsy; Disease related genes; Voltage-gated ion channels:Voltage-Gated Potassium Channels; Potential drug targets; Transporters:Transporter channels and pores		Amitriptyline; Meclofenamic acid; Gabapentin; Ezogabine; ICA-105665			0.0	0.0	0.0	0.0	0.0	1.0	0.0	0.0	0.0	0.0	0.0	1.0	0.0	0.0	0.0	0.0	0.0	0.0	0.0	0.0
ALPK3	57538	symbol	H. sapiens	57538	H. sapiens	ALPK3	alpha kinase 3	GO:0055013 cardiac muscle cell development;GO:0055006 cardiac cell development;GO:0055007 cardiac muscle cell differentiation	Atypical: Alpha-type protein kinase family	Predicted intracellular proteins; ENZYME proteins:Transferases; Disease related genes; Kinases:Atypical kinases; Enzymes; Potential drug targets	Nucleoplasm (Approved)				0.0	0.0	0.0	0.0	0.0	0.0	0.0	0.0	0.0	0.0	0.0	0.0	0.0	0.0	0.0	0.0	0.0	0.0	0.0	0.0
PGBD5	79605	symbol	H. sapiens	79605	H. sapiens	PGBD5	piggyBac transposable element derived 5	GO:0098038 non-replicative transposition, DNA-mediated;GO:0006313 transposition, DNA-mediated;GO:0032196 transposition		Disease related genes; Predicted intracellular proteins	Nucleoplasm (Supported)				0.0	0.0	0.0	0.0	0.0	0.0	0.0	0.0	0.0	0.0	0.0	0.0	0.0	0.0	0.0	0.0	0.0	0.0	0.0	0.0
MCF2L	23263	symbol	H. sapiens	23263	H. sapiens	MCF2L	MCF.2 cell line derived transforming sequence like	GO:0035025 positive regulation of Rho protein signal transduction;GO:0046579 positive regulation of Ras protein signal transduction;GO:0051057 positive regulation of small GTPase mediated signal transduction		Predicted intracellular proteins			(M83)PID CDC42 REG PATHWAY; (M68)PID RHOA REG PATHWAY; (M187)PID TRKR PATHWAY		1.0	0.0	1.0	0.0	0.0	0.0	0.0	0.0	0.0	0.0	0.0	0.0	0.0	0.0	0.0	1.0	0.0	0.0	0.0	0.0
FRMD4A	55691	symbol	H. sapiens	55691	H. sapiens	FRMD4A	FERM domain containing 4A	GO:0090162 establishment of epithelial cell polarity;GO:0050709 negative regulation of protein secretion;GO:0030010 establishment of cell polarity		Disease related genes; Predicted intracellular proteins; Human disease related genes:Congenital malformations:Congenital malformations of the nervous system	Golgi apparatus (Approved); Additional: Nucleoplasm				0.0	0.0	0.0	0.0	0.0	0.0	0.0	0.0	0.0	0.0	0.0	0.0	0.0	0.0	0.0	0.0	0.0	0.0	0.0	0.0
LINC01605	100507420	symbol	H. sapiens	100507420	H. sapiens	LINC01605	long intergenic non-protein coding RNA 1605								0.0	0.0	0.0	0.0	0.0	0.0	0.0	0.0	0.0	0.0	0.0	0.0	0.0	0.0	0.0	0.0	0.0	0.0	0.0	0.0
MT-CO2	4513	gene_synonym	H. sapiens	4513	H. sapiens	COX2	cytochrome c oxidase subunit II	GO:0010729 positive regulation of hydrogen peroxide biosynthetic process;GO:0010726 positive regulation of hydrogen peroxide metabolic process;GO:0010728 regulation of hydrogen peroxide biosynthetic process		Disease related genes; ENZYME proteins; Transporters:Primary Active Transporters; Potential drug targets; Enzymes; Human disease related genes:Congenital disorders of metabolism:Mitochondrial diseases		Cholic Acid; N-Formylmethionine; Talmapimod	(M223)PID BETA CATENIN NUC PATHWAY		0.0	1.0	0.0	0.0	0.0	1.0	0.0	0.0	0.0	0.0	0.0	0.0	0.0	0.0	0.0	0.0	1.0	0.0	0.0	0.0
SLC9A9	285195	symbol	H. sapiens	285195	H. sapiens	SLC9A9	solute carrier family 9 member A9	GO:0098719 sodium ion import across plasma membrane;GO:0051453 regulation of intracellular pH;GO:0030641 regulation of cellular pH		Disease related genes; Transporters:Electrochemical Potential-driven transporters; Potential drug targets; Human disease related genes:Other diseases:Mental and behavioural disorders					0.0	1.0	0.0	1.0	0.0	1.0	0.0	0.0	0.0	0.0	0.0	0.0	0.0	0.0	0.0	0.0	0.0	0.0	0.0	0.0
CGNL1	84952	symbol	H. sapiens	84952	H. sapiens	CGNL1	cingulin like 1	GO:0150105 protein localization to cell-cell junction;GO:0051497 negative regulation of stress fiber assembly;GO:0032232 negative regulation of actin filament bundle assembly		Disease related genes; Predicted intracellular proteins	Cell Junctions (Supported); Additional: Nuclear bodies				1.0	0.0	0.0	0.0	0.0	0.0	0.0	0.0	0.0	0.0	1.0	0.0	0.0	0.0	0.0	0.0	0.0	0.0	0.0	0.0
GTPBP6	8225	symbol	H. sapiens	8225	H. sapiens	GTPBP6	GTP binding protein 6 (putative)			Predicted intracellular proteins	Mitochondria (Approved); Additional: Nucleoplasm				0.0	0.0	0.0	0.0	0.0	0.0	0.0	0.0	0.0	0.0	0.0	0.0	0.0	0.0	0.0	0.0	0.0	0.0	0.0	0.0
SAT1	6303	symbol	H. sapiens	6303	H. sapiens	SAT1	spermidine/spermine N1-acetyltransferase 1	GO:0009447 putrescine catabolic process;GO:0032917 polyamine acetylation;GO:0032918 spermidine acetylation		Human disease related genes:Congenital malformations:Congenital malformations of skin; Predicted intracellular proteins; ENZYME proteins:Transferases; Disease related genes; Potential drug targets; Enzymes		N-ethyl-N-[3-(propylamino)propyl]propane-1,3-diamine	(M118)PID INTEGRIN A9B1 PATHWAY	(M5908)HALLMARK ANDROGEN RESPONSE; (M5902)HALLMARK APOPTOSIS; (M5890)HALLMARK TNFA SIGNALING VIA NFKB	0.0	0.0	0.0	0.0	0.0	0.0	0.0	0.0	0.0	1.0	0.0	0.0	0.0	0.0	0.0	0.0	0.0	0.0	0.0	0.0
LINC00106	751580	symbol	H. sapiens	751580	H. sapiens	LINC00106	long intergenic non-protein coding RNA 106								0.0	0.0	0.0	0.0	0.0	0.0	0.0	0.0	0.0	0.0	0.0	0.0	0.0	0.0	0.0	0.0	0.0	0.0	0.0	0.0
FCGBP	8857	symbol	H. sapiens	8857	H. sapiens	FCGBP	Fc gamma binding protein			Predicted intracellular proteins; Predicted secreted proteins	Plasma membrane (Approved); Additional: Cytokinetic bridge;Golgi apparatus				0.0	0.0	0.0	0.0	0.0	0.0	0.0	0.0	0.0	0.0	0.0	0.0	0.0	0.0	0.0	0.0	0.0	0.0	0.0	0.0
FAM110B	90362	symbol	H. sapiens	90362	H. sapiens	FAM110B	family with sequence similarity 110 member B			Predicted intracellular proteins	Cytosol;Mitochondria (Supported)				0.0	0.0	0.0	0.0	0.0	0.0	0.0	0.0	0.0	0.0	0.0	0.0	0.0	0.0	0.0	0.0	0.0	0.0	0.0	0.0
CPED1	79974	symbol	H. sapiens	79974	H. sapiens	CPED1	cadherin like and PC-esterase domain containing 1			Predicted intracellular proteins	Nucleoplasm (Approved)				0.0	0.0	0.0	0.0	0.0	0.0	0.0	0.0	0.0	0.0	0.0	0.0	0.0	0.0	0.0	0.0	0.0	0.0	0.0	0.0
PAM	5066	symbol	H. sapiens	5066	H. sapiens	PAM	peptidylglycine alpha-amidating monooxygenase	GO:0018032 protein amidation;GO:0062112 fatty acid primary amide biosynthetic process;GO:0062126 fatty acid primary amide metabolic process		Enzymes; Predicted secreted proteins; ENZYME proteins:Lyases; ENZYME proteins:Oxidoreductases; Predicted intracellular proteins	Cytosol;Golgi apparatus (Approved)	Ascorbic acid; N-Alpha-Acetyl-3,5-Diiodotyrosylglycine; N-alpha-Acetyl-3,5-diiodotyrosyl-D-threonine		(M5910)HALLMARK PROTEIN SECRETION; (M5891)HALLMARK HYPOXIA; (M5937)HALLMARK GLYCOLYSIS	0.0	0.0	0.0	0.0	0.0	0.0	0.0	0.0	0.0	0.0	1.0	0.0	0.0	0.0	0.0	0.0	0.0	0.0	0.0	0.0
ASMTL	8623	symbol	H. sapiens	8623	H. sapiens	ASMTL	acetylserotonin O-methyltransferase like	GO:0032259 methylation;GO:0009117 nucleotide metabolic process;GO:0006753 nucleoside phosphate metabolic process		Predicted intracellular proteins; Enzymes; ENZYME proteins:Hydrolases	Cytosol (Enhanced)				0.0	1.0	0.0	0.0	0.0	0.0	0.0	0.0	0.0	0.0	0.0	0.0	0.0	0.0	0.0	0.0	0.0	0.0	0.0	0.0
RALGAPA2	57186	symbol	H. sapiens	57186	H. sapiens	RALGAPA2	Ral GTPase activating protein catalytic subunit alpha 2	GO:0090630 activation of GTPase activity;GO:0043547 positive regulation of GTPase activity;GO:0051056 regulation of small GTPase mediated signal transduction		Predicted intracellular proteins	Cytosol;Plasma membrane (Supported)				1.0	0.0	0.0	0.0	0.0	0.0	0.0	0.0	0.0	0.0	0.0	0.0	0.0	0.0	0.0	0.0	0.0	0.0	0.0	0.0
ITGB5	3693	symbol	H. sapiens	3693	H. sapiens	ITGB5	integrin subunit beta 5	GO:0030038 contractile actin filament bundle assembly;GO:0043149 stress fiber assembly;GO:0090136 epithelial cell-cell adhesion		Predicted intracellular proteins; Cancer-related genes:Candidate cancer biomarkers	Mitochondria;Plasma membrane (Approved)		(M212)PID INTEGRIN5 PATHWAY; (M47)PID INTEGRIN CS PATHWAY; (M174)PID UPA UPAR PATHWAY	(M5909)HALLMARK MYOGENESIS; (M5930)HALLMARK EPITHELIAL MESENCHYMAL TRANSITION	0.0	0.0	0.0	0.0	0.0	1.0	0.0	0.0	0.0	0.0	0.0	0.0	1.0	0.0	1.0	1.0	0.0	0.0	0.0	0.0
RHOH	399	symbol	H. sapiens	399	H. sapiens	RHOH	ras homolog family member H	GO:0043652 engulfment of apoptotic cell;GO:0016601 Rac protein signal transduction;GO:0045576 mast cell activation		Disease related genes; Cancer-related genes; Predicted intracellular proteins; Human disease related genes:Skin diseases:Skin and soft tissue diseases	Golgi apparatus;Vesicles (Approved)			(M5947)HALLMARK IL2 STAT5 SIGNALING	0.0	0.0	1.0	0.0	1.0	0.0	1.0	1.0	0.0	0.0	1.0	0.0	1.0	0.0	0.0	0.0	0.0	0.0	1.0	1.0
ITGAL	3683	symbol	H. sapiens	3683	H. sapiens	ITGAL	integrin subunit alpha L	GO:0035683 memory T cell extravasation;GO:0002291 T cell activation via T cell receptor contact with antigen bound to MHC molecule on antigen presenting cell;GO:0072683 T cell extravasation		Transporters:Accessory Factors Involved in Transport; CD markers; Predicted intracellular proteins; FDA approved drug targets:Small molecule drugs; FDA approved drug targets:Biotech drugs		Efalizumab; Antithymocyte immunoglobulin (rabbit); Lovastatin; Simvastatin; Rosuvastatin; 1-Acetyl-4-(4-{4-[(2-Ethoxyphenyl)Thio]-3-Nitrophenyl}Pyridin-2-Yl)Piperazine; LFA703; (S)-2-((S)-3-isobutyl-2,5-dioxo-4-quinolin-3-ylmethyl-[1,4]diazepan-1yl)-N-methyl-3-naphtalen-2-yl-propionamide; 7A-[(4-cyanophenyl)methyl]-6-(3,5-dichlorophenyl)-5-oxo-2,3,5,7A-tetrahydro-1H-pyrrolo[1,2-A]pyrrole-7-carbon…	(M47)PID INTEGRIN CS PATHWAY; (M169)PID INTEGRIN2 PATHWAY; (M222)PID CXCR3 PATHWAY	(M5950)HALLMARK ALLOGRAFT REJECTION	0.0	0.0	0.0	0.0	0.0	0.0	1.0	0.0	1.0	0.0	0.0	0.0	0.0	1.0	1.0	1.0	0.0	0.0	0.0	1.0
SRSF7	6432	symbol	H. sapiens	6432	H. sapiens	SRSF7	serine and arginine rich splicing factor 7	GO:0048025 negative regulation of mRNA splicing, via spliceosome;GO:0033119 negative regulation of RNA splicing;GO:0050686 negative regulation of mRNA processing		Predicted intracellular proteins	Nucleoplasm (Enhanced)			(M5926)HALLMARK MYC TARGETS V1	0.0	1.0	0.0	0.0	0.0	0.0	0.0	0.0	0.0	0.0	0.0	0.0	0.0	0.0	0.0	0.0	0.0	0.0	0.0	0.0
LILRB4	11006	symbol	H. sapiens	11006	H. sapiens	LILRB4	leukocyte immunoglobulin like receptor B4	GO:0045584 negative regulation of cytotoxic T cell differentiation;GO:0140105 interleukin-10-mediated signaling pathway;GO:0150102 negative regulation of monocyte activation		Predicted intracellular proteins; CD markers					0.0	0.0	0.0	0.0	1.0	0.0	1.0	1.0	0.0	0.0	0.0	0.0	1.0	0.0	0.0	0.0	0.0	0.0	0.0	0.0
AFAP1	60312	symbol	H. sapiens	60312	H. sapiens	AFAP1	actin filament associated protein 1	GO:0051493 regulation of cytoskeleton organization;GO:0033043 regulation of organelle organization;GO:0051128 regulation of cellular component organization		Predicted intracellular proteins	Actin filaments;Cytosol (Supported); Additional: Focal adhesion sites				0.0	0.0	0.0	0.0	0.0	0.0	0.0	0.0	0.0	0.0	1.0	0.0	0.0	0.0	0.0	0.0	0.0	0.0	0.0	0.0
ADGRD1	283383	symbol	H. sapiens	283383	H. sapiens	ADGRD1	adhesion G protein-coupled receptor D1	GO:0007189 adenylate cyclase-activating G protein-coupled receptor signaling pathway;GO:0007188 adenylate cyclase-modulating G protein-coupled receptor signaling pathway;GO:0007186 G protein-coupled receptor signaling pathway		G-protein coupled receptors:GPCRs excl olfactory receptors; G-protein coupled receptors:Family 2 (B) receptors; Predicted intracellular proteins	Nucleoplasm;Plasma membrane (Approved)	Onapristone			0.0	0.0	0.0	0.0	0.0	0.0	0.0	0.0	0.0	0.0	0.0	0.0	0.0	0.0	0.0	0.0	0.0	0.0	0.0	0.0
TGFBI	7045	symbol	H. sapiens	7045	H. sapiens	TGFBI	transforming growth factor beta induced	GO:0002062 chondrocyte differentiation;GO:0051216 cartilage development;GO:0061448 connective tissue development		Disease related genes; Predicted intracellular proteins; Predicted secreted proteins; Human disease related genes:Nervous system diseases:Eye disease			(M169)PID INTEGRIN2 PATHWAY; (M53)PID INTEGRIN3 PATHWAY; (M18)PID INTEGRIN1 PATHWAY	(M5891)HALLMARK HYPOXIA; (M5915)HALLMARK APICAL JUNCTION; (M5930)HALLMARK EPITHELIAL MESENCHYMAL TRANSITION	0.0	0.0	0.0	0.0	1.0	0.0	0.0	0.0	0.0	1.0	0.0	0.0	0.0	1.0	0.0	0.0	0.0	0.0	0.0	0.0
LYST	1130	symbol	H. sapiens	1130	H. sapiens	LYST	lysosomal trafficking regulator	GO:0033364 mast cell secretory granule organization;GO:0032510 endosome to lysosome transport via multivesicular body sorting pathway;GO:0042832 defense response to protozoan		Disease related genes; Human disease related genes:Immune system diseases:Primary immunodeficiency; Predicted intracellular proteins	Nucleoplasm (Supported); Additional: Centriolar satellite;Plasma membrane				0.0	0.0	0.0	0.0	0.0	0.0	1.0	0.0	0.0	0.0	0.0	0.0	0.0	0.0	0.0	0.0	0.0	0.0	1.0	1.0
FOXP2	93986	symbol	H. sapiens	93986	H. sapiens	FOXP2	forkhead box P2	GO:0021757 caudate nucleus development;GO:0021758 putamen development;GO:0021756 striatum development		Disease related genes; Transcription factors:Helix-turn-helix domains; Predicted intracellular proteins; Human disease related genes:Other diseases:Mental and behavioural disorders	Nucleoplasm (Enhanced)				0.0	0.0	0.0	0.0	0.0	0.0	0.0	0.0	0.0	0.0	0.0	0.0	0.0	0.0	0.0	0.0	0.0	0.0	0.0	0.0
CCDC26	137196	symbol	H. sapiens	137196	H. sapiens	CCDC26	CCDC26 long non-coding RNA								0.0	0.0	0.0	0.0	0.0	0.0	0.0	0.0	0.0	0.0	0.0	0.0	0.0	0.0	0.0	0.0	0.0	0.0	0.0	0.0
RAMP1	10267	symbol	H. sapiens	10267	H. sapiens	RAMP1	receptor activity modifying protein 1	GO:1990408 calcitonin gene-related peptide receptor signaling pathway;GO:0097647 amylin receptor signaling pathway;GO:0097646 calcitonin family receptor signaling pathway		Transporters:Accessory Factors Involved in Transport; FDA approved drug targets:Small molecule drugs	Nuclear membrane;Nucleoplasm (Approved)	Pramlintide			0.0	0.0	1.0	0.0	0.0	1.0	0.0	0.0	0.0	1.0	0.0	0.0	1.0	0.0	0.0	1.0	0.0	0.0	0.0	0.0
SOX5	6660	symbol	H. sapiens	6660	H. sapiens	SOX5	SRY-box transcription factor 5	GO:2000741 positive regulation of mesenchymal stem cell differentiation;GO:0055059 asymmetric neuroblast division;GO:2000739 regulation of mesenchymal stem cell differentiation		Disease related genes; Transcription factors:Other all-alpha-helical DNA-binding domains; Predicted intracellular proteins; Human disease related genes:Other congenital disorders:Chromosomal abnormalities	Nucleoplasm (Supported)				0.0	0.0	0.0	0.0	1.0	0.0	0.0	0.0	0.0	0.0	0.0	0.0	0.0	0.0	0.0	0.0	0.0	0.0	0.0	0.0
RGS16	6004	symbol	H. sapiens	6004	H. sapiens	RGS16	regulator of G protein signaling 16	GO:0008277 regulation of G protein-coupled receptor signaling pathway;GO:0007601 visual perception;GO:0050953 sensory perception of light stimulus		Predicted intracellular proteins	Cytosol (Approved)			(M5947)HALLMARK IL2 STAT5 SIGNALING; (M5932)HALLMARK INFLAMMATORY RESPONSE; (M5939)HALLMARK P53 PATHWAY	0.0	0.0	0.0	0.0	0.0	0.0	0.0	0.0	0.0	0.0	0.0	0.0	0.0	0.0	0.0	1.0	0.0	0.0	0.0	0.0
UTRN	7402	symbol	H. sapiens	7402	H. sapiens	UTRN	utrophin	GO:0001954 positive regulation of cell-matrix adhesion;GO:2000649 regulation of sodium ion transmembrane transporter activity;GO:1902305 regulation of sodium ion transmembrane transport		Predicted intracellular proteins	Nucleoplasm;Plasma membrane (Approved)	Zinc; Zinc acetate; Zinc chloride; Zinc sulfate, unspecified form			0.0	0.0	0.0	0.0	1.0	1.0	0.0	0.0	0.0	0.0	0.0	1.0	0.0	0.0	0.0	0.0	0.0	0.0	0.0	0.0
ZNF710	374655	symbol	H. sapiens	374655	H. sapiens	ZNF710	zinc finger protein 710	GO:0006357 regulation of transcription by RNA polymerase II;GO:0006355 regulation of transcription, DNA-templated;GO:1903506 regulation of nucleic acid-templated transcription		Transcription factors:Zinc-coordinating DNA-binding domains; Predicted intracellular proteins	Mitochondria (Approved); Additional: Nucleoplasm				0.0	0.0	0.0	0.0	0.0	0.0	0.0	0.0	0.0	0.0	0.0	0.0	0.0	0.0	0.0	0.0	0.0	0.0	0.0	0.0
TMEM71	137835	symbol	H. sapiens	137835	H. sapiens	TMEM71	transmembrane protein 71			Predicted intracellular proteins	Mitochondria (Enhanced)				0.0	0.0	0.0	0.0	0.0	0.0	0.0	0.0	0.0	0.0	0.0	0.0	0.0	0.0	0.0	0.0	0.0	0.0	0.0	0.0
ARL4C	10123	symbol	H. sapiens	10123	H. sapiens	ARL4C	ADP ribosylation factor like GTPase 4C	GO:0032456 endocytic recycling;GO:0098876 vesicle-mediated transport to the plasma membrane;GO:0016197 endosomal transport		Predicted intracellular proteins	Plasma membrane (Supported); Additional: Cytosol				0.0	0.0	0.0	1.0	0.0	0.0	0.0	0.0	0.0	0.0	0.0	0.0	0.0	0.0	0.0	0.0	0.0	0.0	0.0	0.0
NPAS3	64067	symbol	H. sapiens	64067	H. sapiens	NPAS3	neuronal PAS domain protein 3	GO:0045893 positive regulation of transcription, DNA-templated;GO:1903508 positive regulation of nucleic acid-templated transcription;GO:1902680 positive regulation of RNA biosynthetic process		Disease related genes; Transcription factors:Basic domains; Predicted intracellular proteins	Nucleoplasm (Supported)				0.0	0.0	0.0	0.0	0.0	0.0	0.0	0.0	0.0	0.0	0.0	0.0	0.0	0.0	0.0	0.0	0.0	0.0	0.0	0.0
PLEKHG1	57480	symbol	H. sapiens	57480	H. sapiens	PLEKHG1	pleckstrin homology and RhoGEF domain containing G1	GO:0051056 regulation of small GTPase mediated signal transduction;GO:1902531 regulation of intracellular signal transduction;GO:0050790 regulation of catalytic activity		Predicted intracellular proteins	Nucleoplasm (Enhanced)				1.0	0.0	1.0	0.0	0.0	0.0	0.0	0.0	0.0	0.0	0.0	0.0	0.0	0.0	0.0	0.0	0.0	0.0	0.0	0.0
PCNX2	80003	symbol	H. sapiens	80003	H. sapiens	PCNX2	pecanex 2	GO:0008150 biological_process		Predicted intracellular proteins	Endoplasmic reticulum (Approved)				0.0	0.0	0.0	0.0	0.0	0.0	0.0	0.0	0.0	0.0	0.0	0.0	0.0	0.0	0.0	0.0	0.0	0.0	0.0	0.0
ESRRG	2104	symbol	H. sapiens	2104	H. sapiens	ESRRG	estrogen related receptor gamma	GO:0048384 retinoic acid receptor signaling pathway;GO:0043401 steroid hormone mediated signaling pathway;GO:0120162 positive regulation of cold-induced thermogenesis		Transcription factors:Zinc-coordinating DNA-binding domains; Nuclear receptors; Predicted intracellular proteins; FDA approved drug targets:Small molecule drugs	Nucleoplasm (Approved)	Troglitazone; Diethylstilbestrol; Tamoxifen; Cholic Acid; Afimoxifene; 4-HYDROXY-N'-(4-ISOPROPYLBENZYL)BENZOHYDRAZIDE; p-Cumylphenol; Bisphenol A; Bisphenol Z; Estradiol acetate; Estradiol benzoate; Estradiol cypionate; Estradiol dienanthate; Estradiol valerate			0.0	0.0	0.0	0.0	0.0	0.0	0.0	0.0	0.0	0.0	0.0	0.0	0.0	0.0	0.0	0.0	0.0	0.0	0.0	0.0
ZFYVE28	57732	symbol	H. sapiens	57732	H. sapiens	ZFYVE28	zinc finger FYVE-type containing 28	GO:0007175 negative regulation of epidermal growth factor-activated receptor activity;GO:0042059 negative regulation of epidermal growth factor receptor signaling pathway;GO:0007176 regulation of epidermal growth factor-activated receptor activity		Predicted intracellular proteins	Cytosol;Plasma membrane (Approved); Additional: Nucleoplasm		(M214)PID ERBB1 INTERNALIZATION PATHWAY		0.0	0.0	0.0	0.0	0.0	0.0	0.0	0.0	0.0	0.0	0.0	0.0	0.0	0.0	0.0	0.0	0.0	0.0	0.0	0.0
SESTD1	91404	symbol	H. sapiens	91404	H. sapiens	SESTD1	SEC14 and spectrin domain containing 1	GO:1904878 negative regulation of calcium ion transmembrane transport via high voltage-gated calcium channel;GO:1902514 regulation of calcium ion transmembrane transport via high voltage-gated calcium channel;GO:1903170 negative regulation of calcium ion transmembrane transport		Predicted intracellular proteins	Intermediate filaments (Enhanced)				0.0	0.0	0.0	0.0	0.0	1.0	0.0	0.0	0.0	0.0	0.0	0.0	0.0	0.0	0.0	0.0	0.0	0.0	0.0	0.0
BMPR1A	657	symbol	H. sapiens	657	H. sapiens	BMPR1A	bone morphogenetic protein receptor type 1A	GO:0021998 neural plate mediolateral regionalization;GO:0048338 mesoderm structural organization;GO:0048352 paraxial mesoderm structural organization	TKL Ser/Thr protein kinase family	Predicted intracellular proteins; Cancer-related genes; ENZYME proteins:Transferases; CD markers; Disease related genes; Human disease related genes:Digestive system diseases:Gastrointestinal diseases; Kinases:TKL Ser/Thr protein kinases; Enzymes; FDA approved drug targets:Biotech drugs	Cytosol (Approved)	Dibotermin alfa	(M181)PID BMP PATHWAY	(M5896)HALLMARK TGF BETA SIGNALING; (M5942)HALLMARK UV RESPONSE DN	0.0	0.0	0.0	0.0	0.0	0.0	0.0	0.0	0.0	1.0	0.0	0.0	0.0	0.0	0.0	0.0	0.0	0.0	1.0	0.0
SRGAP3	9901	symbol	H. sapiens	9901	H. sapiens	SRGAP3	SLIT-ROBO Rho GTPase activating protein 3	GO:0051056 regulation of small GTPase mediated signal transduction;GO:0030336 negative regulation of cell migration;GO:2000146 negative regulation of cell motility		Disease related genes; Predicted intracellular proteins	Cytosol (Approved)				1.0	0.0	1.0	0.0	0.0	0.0	0.0	0.0	0.0	1.0	0.0	1.0	0.0	0.0	0.0	0.0	0.0	0.0	0.0	0.0
CECR2	27443	symbol	H. sapiens	27443	H. sapiens	CECR2	CECR2 histone acetyl-lysine reader	GO:0006309 apoptotic DNA fragmentation;GO:0000737 DNA catabolic process, endonucleolytic;GO:0030262 apoptotic nuclear changes		Predicted intracellular proteins	Nucleoplasm (Approved); Additional: Vesicles				0.0	0.0	0.0	0.0	0.0	0.0	0.0	0.0	0.0	0.0	0.0	0.0	0.0	0.0	0.0	0.0	0.0	0.0	0.0	0.0
CEP112	201134	symbol	H. sapiens	201134	H. sapiens	CEP112	centrosomal protein 112	GO:0097120 receptor localization to synapse;GO:0031503 protein-containing complex localization;GO:0051179 localization		Predicted intracellular proteins	Centrosome;Nucleoplasm (Approved); Additional: Cytosol;Midbody ring				0.0	0.0	0.0	0.0	0.0	0.0	0.0	0.0	0.0	0.0	0.0	0.0	0.0	0.0	0.0	0.0	0.0	0.0	0.0	0.0
CACNB4	785	symbol	H. sapiens	785	H. sapiens	CACNB4	calcium voltage-gated channel auxiliary subunit beta 4	GO:0007528 neuromuscular junction development;GO:1901385 regulation of voltage-gated calcium channel activity;GO:1901019 regulation of calcium ion transmembrane transporter activity		Human disease related genes:Nervous system diseases:Neurodegenerative diseases; FDA approved drug targets:Small molecule drugs; Human disease related genes:Nervous system diseases:Epilepsy; Disease related genes; Predicted intracellular proteins; Transporters:Accessory Factors Involved in Transport		Nimodipine; Mibefradil; Dronedarone			0.0	0.0	0.0	0.0	0.0	1.0	0.0	0.0	0.0	0.0	0.0	1.0	0.0	0.0	0.0	0.0	0.0	0.0	0.0	0.0
MT-ND3	4537	gene_synonym	H. sapiens	4537	H. sapiens	ND3	NADH dehydrogenase subunit 3	GO:0009642 response to light intensity;GO:0006120 mitochondrial electron transport, NADH to ubiquinone;GO:0071385 cellular response to glucocorticoid stimulus		Disease related genes; ENZYME proteins; Potential drug targets; Enzymes; Human disease related genes:Congenital disorders of metabolism:Mitochondrial diseases	Cytosol (Uncertain)	NADH			0.0	1.0	0.0	0.0	0.0	0.0	0.0	0.0	0.0	0.0	0.0	0.0	0.0	0.0	0.0	0.0	0.0	0.0	0.0	0.0
ABCC4	10257	symbol	H. sapiens	10257	H. sapiens	ABCC4	ATP binding cassette subfamily C member 4	GO:0070730 cAMP transport;GO:0032310 prostaglandin secretion;GO:0015732 prostaglandin transport		ENZYME proteins; Enzymes; Transporters:Primary Active Transporters	Plasma membrane (Supported); Additional: Golgi apparatus;Nucleoli	ATP		(M5908)HALLMARK ANDROGEN RESPONSE	0.0	0.0	0.0	1.0	0.0	0.0	0.0	0.0	1.0	0.0	0.0	0.0	0.0	0.0	0.0	0.0	0.0	0.0	0.0	0.0
CACNB2	783	symbol	H. sapiens	783	H. sapiens	CACNB2	calcium voltage-gated channel auxiliary subunit beta 2	GO:0098912 membrane depolarization during atrial cardiac muscle cell action potential;GO:0099533 positive regulation of presynaptic cytosolic calcium concentration;GO:0099703 induction of synaptic vesicle exocytosis by positive regulation of presynaptic cytosolic calcium ion concentration		FDA approved drug targets:Small molecule drugs; Human disease related genes:Cardiovascular diseases:Cardiac diseases; Disease related genes; Predicted intracellular proteins; Transporters:Accessory Factors Involved in Transport		Isradipine; Nimodipine; Nisoldipine; Nicardipine; Felodipine; Nitrendipine; Nifedipine; Mibefradil; Dronedarone; Nilvadipine			0.0	0.0	0.0	0.0	0.0	1.0	0.0	0.0	0.0	0.0	0.0	1.0	0.0	0.0	0.0	0.0	0.0	0.0	0.0	0.0
ATP8B4	79895	symbol	H. sapiens	79895	H. sapiens	ATP8B4	ATPase phospholipid transporting 8B4 (putative)	GO:0045332 phospholipid translocation;GO:0034204 lipid translocation;GO:0097035 regulation of membrane lipid distribution		ENZYME proteins; Predicted intracellular proteins; Enzymes	Nucleoplasm;Vesicles (Uncertain); Additional: Cytosol				0.0	0.0	0.0	1.0	0.0	0.0	0.0	0.0	0.0	0.0	0.0	0.0	0.0	1.0	0.0	0.0	0.0	0.0	0.0	0.0
LRRC39	127495	symbol	H. sapiens	127495	H. sapiens	LRRC39	leucine rich repeat containing 39	GO:0006470 protein dephosphorylation;GO:0016311 dephosphorylation;GO:0006796 phosphate-containing compound metabolic process		Predicted intracellular proteins					0.0	0.0	0.0	0.0	0.0	0.0	0.0	0.0	0.0	0.0	0.0	0.0	0.0	0.0	0.0	0.0	0.0	0.0	0.0	0.0
CD226	10666	symbol	H. sapiens	10666	H. sapiens	CD226	CD226 molecule	GO:0060369 positive regulation of Fc receptor mediated stimulatory signaling pathway;GO:0002860 positive regulation of natural killer cell mediated cytotoxicity directed against tumor cell target;GO:0002857 positive regulation of natural killer cell mediated immune response to tumor cell		Predicted intracellular proteins; Human disease related genes:Endocrine and metabolic diseases:Diabetes; CD markers	Plasma membrane (Supported); Additional: Centriolar satellite;Nucleoplasm				0.0	0.0	0.0	0.0	1.0	0.0	0.0	0.0	0.0	0.0	0.0	0.0	0.0	0.0	0.0	0.0	0.0	1.0	0.0	0.0
CABLES1	91768	symbol	H. sapiens	91768	H. sapiens	CABLES1	Cdk5 and Abl enzyme substrate 1	GO:0051301 cell division;GO:0051726 regulation of cell cycle;GO:0007049 cell cycle		Predicted intracellular proteins	Nuclear bodies;Nucleoplasm (Supported)		(M142)PID AJDISS 2PATHWAY; (M256)PID TAP63 PATHWAY		0.0	0.0	0.0	0.0	0.0	0.0	0.0	0.0	1.0	0.0	0.0	0.0	0.0	0.0	0.0	0.0	0.0	0.0	0.0	0.0
FOSL2	2355	symbol	H. sapiens	2355	H. sapiens	FOSL2	FOS like 2, AP-1 transcription factor subunit	GO:0003334 keratinocyte development;GO:0048146 positive regulation of fibroblast proliferation;GO:0048145 regulation of fibroblast proliferation		Transcription factors:Basic domains; Predicted intracellular proteins	Nucleoplasm (Enhanced)		(M65)PID FRA PATHWAY; (M236)PID DELTA NP63 PATHWAY; (M167)PID AP1 PATHWAY	(M5890)HALLMARK TNFA SIGNALING VIA NFKB; (M5891)HALLMARK HYPOXIA	0.0	0.0	0.0	0.0	0.0	0.0	0.0	0.0	0.0	0.0	0.0	0.0	0.0	0.0	0.0	0.0	0.0	0.0	0.0	0.0
RTTN	25914	symbol	H. sapiens	25914	H. sapiens	RTTN	rotatin	GO:0032053 ciliary basal body organization;GO:0010457 centriole-centriole cohesion;GO:0007099 centriole replication		Disease related genes; Predicted intracellular proteins; Human disease related genes:Congenital malformations:Congenital malformations of the nervous system	Cytosol (Approved); Additional: Centrosome				0.0	0.0	0.0	0.0	0.0	0.0	0.0	0.0	0.0	0.0	0.0	0.0	0.0	0.0	0.0	0.0	0.0	0.0	0.0	0.0
C3	718	symbol	H. sapiens	718	H. sapiens	C3	complement C3	GO:0001798 positive regulation of type IIa hypersensitivity;GO:0002894 positive regulation of type II hypersensitivity;GO:0001970 positive regulation of activation of membrane attack complex		Predicted secreted proteins; Candidate cardiovascular disease genes; Disease related genes; Human disease related genes:Nervous system diseases:Eye disease; Human disease related genes:Cardiovascular diseases:Hematologic diseases; Human disease related genes:Immune system diseases:Primary immunodeficiency; Predicted intracellular proteins; FDA approved drug targets:Biotech drugs		Human immunoglobulin G; Zinc; S-Hydroxycysteine; Mirococept; Copper; Zinc acetate; Zinc chloride; Zinc sulfate, unspecified form	(M119)PID ERB GENOMIC PATHWAY; (M169)PID INTEGRIN2 PATHWAY; (M200)PID ERA GENOMIC PATHWAY	(M5946)HALLMARK COAGULATION; (M5905)HALLMARK ADIPOGENESIS; (M5921)HALLMARK COMPLEMENT	0.0	0.0	1.0	1.0	0.0	1.0	1.0	0.0	0.0	0.0	0.0	0.0	0.0	1.0	1.0	1.0	0.0	1.0	0.0	0.0
MBNL1	4154	symbol	H. sapiens	4154	H. sapiens	MBNL1	muscleblind like splicing regulator 1	GO:0045445 myoblast differentiation;GO:0000381 regulation of alternative mRNA splicing, via spliceosome;GO:0048024 regulation of mRNA splicing, via spliceosome		Disease related genes; Predicted intracellular proteins	Nucleoplasm (Enhanced); Additional: Cytosol				0.0	0.0	0.0	0.0	0.0	0.0	0.0	0.0	0.0	0.0	0.0	0.0	0.0	0.0	1.0	0.0	0.0	0.0	0.0	0.0
RPS6KA3	6197	symbol	H. sapiens	6197	H. sapiens	RPS6KA3	ribosomal protein S6 kinase A3	GO:0043555 regulation of translation in response to stress;GO:0043620 regulation of DNA-templated transcription in response to stress;GO:0002224 toll-like receptor signaling pathway	AGC Ser/Thr protein kinase family	Human disease related genes:Congenital malformations:Other congenital malformations; Predicted intracellular proteins; ENZYME proteins:Transferases; Disease related genes; Kinases:AGC Ser/Thr protein kinases; Potential drug targets; Enzymes; Cancer-related genes:Candidate cancer biomarkers; Human disease related genes:Other diseases:Mental and behavioural disorders	Nucleoplasm (Supported); Additional: Cytosol;Nucleoli	Acetylsalicylic acid; Fostamatinib	(M17200)SA B CELL RECEPTOR COMPLEXES; (M1315)SIG PIP3 SIGNALING IN B LYMPHOCYTES; (M7955)SIG INSULIN RECEPTOR PATHWAY IN CARDIAC MYOCYTES	(M5910)HALLMARK PROTEIN SECRETION; (M5908)HALLMARK ANDROGEN RESPONSE; (M5923)HALLMARK PI3K AKT MTOR SIGNALING	0.0	1.0	0.0	0.0	0.0	1.0	0.0	0.0	0.0	0.0	0.0	1.0	0.0	0.0	1.0	1.0	0.0	0.0	1.0	0.0
RECK	8434	symbol	H. sapiens	8434	H. sapiens	RECK	reversion inducing cysteine rich protein with kazal motifs	GO:0090210 regulation of establishment of blood-brain barrier;GO:0001955 blood vessel maturation;GO:1904684 negative regulation of metalloendopeptidase activity			Plasma membrane (Supported)				0.0	0.0	0.0	0.0	0.0	0.0	0.0	0.0	0.0	1.0	0.0	0.0	0.0	0.0	0.0	0.0	0.0	0.0	1.0	0.0
WDFY4	57705	symbol	H. sapiens	57705	H. sapiens	WDFY4	WDFY family member 4	GO:0036037 CD8-positive, alpha-beta T cell activation;GO:0046631 alpha-beta T cell activation;GO:0098586 cellular response to virus		Predicted intracellular proteins	Nucleoplasm (Approved); Additional: Cytosol				0.0	0.0	0.0	0.0	0.0	0.0	1.0	0.0	0.0	0.0	0.0	0.0	0.0	0.0	0.0	0.0	0.0	0.0	0.0	0.0
SCMH1	22955	symbol	H. sapiens	22955	H. sapiens	SCMH1	Scm polycomb group protein homolog 1	GO:0031507 heterochromatin assembly;GO:0070828 heterochromatin organization;GO:0045814 negative regulation of gene expression, epigenetic		Predicted intracellular proteins	Nucleoplasm (Supported); Additional: Cytosol;Nuclear bodies	Mercaptoethanol			0.0	0.0	0.0	0.0	0.0	0.0	0.0	0.0	0.0	0.0	0.0	0.0	0.0	0.0	0.0	0.0	0.0	0.0	0.0	0.0
MT-ND4	4538	gene_synonym	H. sapiens	4538	H. sapiens	ND4	NADH dehydrogenase subunit 4	GO:0015988 energy coupled proton transmembrane transport, against electrochemical gradient;GO:0015990 electron transport coupled proton transport;GO:0006120 mitochondrial electron transport, NADH to ubiquinone		Human disease related genes:Nervous system diseases:Neurodegenerative diseases; Disease related genes; ENZYME proteins; Potential drug targets; Enzymes; Human disease related genes:Congenital disorders of metabolism:Mitochondrial diseases	Mitochondria (Supported)	NADH			0.0	1.0	0.0	0.0	0.0	1.0	0.0	0.0	0.0	0.0	0.0	0.0	0.0	0.0	0.0	0.0	0.0	0.0	0.0	0.0
SAMD4A	23034	symbol	H. sapiens	23034	H. sapiens	SAMD4A	sterile alpha motif domain containing 4A	GO:0000289 nuclear-transcribed mRNA poly(A) tail shortening;GO:0000288 nuclear-transcribed mRNA catabolic process, deadenylation-dependent decay;GO:0061157 mRNA destabilization		Predicted intracellular proteins	Cell Junctions (Approved); Additional: Cytosol				0.0	0.0	0.0	0.0	0.0	0.0	0.0	0.0	0.0	0.0	0.0	0.0	0.0	0.0	0.0	0.0	0.0	0.0	0.0	0.0
TNFRSF21	27242	symbol	H. sapiens	27242	H. sapiens	TNFRSF21	TNF receptor superfamily member 21	GO:0097252 oligodendrocyte apoptotic process;GO:0034349 glial cell apoptotic process;GO:0032696 negative regulation of interleukin-13 production		CD markers	Cytosol;Plasma membrane (Supported)			(M5944)HALLMARK ANGIOGENESIS; (M5897)HALLMARK IL6 JAK STAT3 SIGNALING; (M5947)HALLMARK IL2 STAT5 SIGNALING	0.0	0.0	0.0	0.0	1.0	0.0	0.0	1.0	0.0	0.0	0.0	0.0	0.0	0.0	0.0	0.0	0.0	0.0	1.0	0.0
AKT3	10000	symbol	H. sapiens	10000	H. sapiens	AKT3	AKT serine/threonine kinase 3	GO:1905653 positive regulation of artery morphogenesis;GO:0045793 positive regulation of cell size;GO:1905651 regulation of artery morphogenesis	AGC Ser/Thr protein kinase family	Human disease related genes:Congenital malformations:Other congenital malformations; RAS pathway related proteins; Predicted intracellular proteins; ENZYME proteins:Transferases; Disease related genes; Kinases:AGC Ser/Thr protein kinases; Potential drug targets; Enzymes; Cancer-related genes:Candidate cancer biomarkers	Cytosol (Supported)		(M12771)SA PTEN PATHWAY; (M18895)SA TRKA RECEPTOR; (M1718)SIG IL4RECEPTOR IN B LYPHOCYTES	(M5957)HALLMARK PANCREAS BETA CELLS; (M5942)HALLMARK UV RESPONSE DN; (M5915)HALLMARK APICAL JUNCTION	0.0	1.0	0.0	1.0	0.0	1.0	0.0	0.0	0.0	1.0	1.0	0.0	0.0	0.0	1.0	1.0	1.0	0.0	0.0	0.0
CXCR4	7852	symbol	H. sapiens	7852	H. sapiens	CXCR4	C-X-C motif chemokine receptor 4	GO:2000448 positive regulation of macrophage migration inhibitory factor signaling pathway;GO:1990478 response to ultrasound;GO:2000446 regulation of macrophage migration inhibitory factor signaling pathway		Transporters; G-protein coupled receptors:Chemokines and chemotactic factors receptors; CD markers; Disease related genes; G-protein coupled receptors:GPCRs excl olfactory receptors; Cancer-related genes:Candidate cancer biomarkers; Human disease related genes:Immune system diseases:Primary immunodeficiency; FDA approved drug targets:Small molecule drugs		Framycetin; AMD-070; Plerixafor; Ibalizumab	(M55)PID S1P S1P3 PATHWAY; (M257)PID EPHRINB REV PATHWAY; (M165)PID SYNDECAN 4 PATHWAY	(M5923)HALLMARK PI3K AKT MTOR SIGNALING; (M5891)HALLMARK HYPOXIA; (M5924)HALLMARK MTORC1 SIGNALING	0.0	0.0	1.0	0.0	1.0	1.0	0.0	0.0	0.0	1.0	0.0	1.0	1.0	0.0	1.0	1.0	0.0	0.0	1.0	1.0
SDK1	221935	symbol	H. sapiens	221935	H. sapiens	SDK1	sidekick cell adhesion molecule 1	GO:0048148 behavioral response to cocaine;GO:0010842 retina layer formation;GO:0042220 response to cocaine		Predicted intracellular proteins	Cytosol (Approved)				0.0	0.0	0.0	0.0	0.0	0.0	0.0	0.0	0.0	0.0	0.0	0.0	0.0	0.0	0.0	0.0	0.0	0.0	0.0	0.0
LINC00470	56651	symbol	H. sapiens	56651	H. sapiens	LINC00470	long intergenic non-protein coding RNA 470	GO:0008150 biological_process							0.0	0.0	0.0	0.0	0.0	0.0	0.0	0.0	0.0	0.0	0.0	0.0	0.0	0.0	0.0	0.0	0.0	0.0	0.0	0.0
MT-CO1	4512	gene_synonym	H. sapiens	4512	H. sapiens	COX1	cytochrome c oxidase subunit I	GO:0015988 energy coupled proton transmembrane transport, against electrochemical gradient;GO:0015990 electron transport coupled proton transport;GO:0006123 mitochondrial electron transport, cytochrome c to oxygen		Human disease related genes:Nervous system diseases:Neurodegenerative diseases; Disease related genes; ENZYME proteins; Transporters:Primary Active Transporters; Potential drug targets; Enzymes; Human disease related genes:Congenital disorders of metabolism:Mitochondrial diseases	Mitochondria (Supported)	Cholic Acid; N-Formylmethionine; Oxygen			0.0	1.0	0.0	0.0	0.0	1.0	0.0	0.0	0.0	0.0	0.0	0.0	0.0	0.0	0.0	0.0	1.0	0.0	0.0	0.0
PTPRE	5791	symbol	H. sapiens	5791	H. sapiens	PTPRE	protein tyrosine phosphatase receptor type E	GO:0046627 negative regulation of insulin receptor signaling pathway;GO:1900077 negative regulation of cellular response to insulin stimulus;GO:0046626 regulation of insulin receptor signaling pathway		Predicted intracellular proteins; Enzymes; ENZYME proteins:Hydrolases	Intermediate filaments (Approved)	Alendronic acid; Tiludronic acid	(M183)PID IL6 7 PATHWAY	(M5890)HALLMARK TNFA SIGNALING VIA NFKB; (M5932)HALLMARK INFLAMMATORY RESPONSE; (M5939)HALLMARK P53 PATHWAY	0.0	0.0	0.0	0.0	0.0	0.0	0.0	0.0	0.0	0.0	0.0	0.0	0.0	0.0	0.0	0.0	0.0	0.0	0.0	0.0
PLAUR	5329	symbol	H. sapiens	5329	H. sapiens	PLAUR	plasminogen activator, urokinase receptor	GO:0038195 urokinase plasminogen activator signaling pathway;GO:2001268 negative regulation of cysteine-type endopeptidase activity involved in apoptotic signaling pathway;GO:0034112 positive regulation of homotypic cell-cell adhesion		FDA approved drug targets:Biotech drugs; Predicted intracellular proteins; Cancer-related genes:Candidate cancer biomarkers; CD markers	Plasma membrane (Supported)	Alteplase; Urokinase; Tenecteplase; WX-UK1; Lanoteplase	(M120)PID ARF6 DOWNSTREAM PATHWAY; (M212)PID INTEGRIN5 PATHWAY; (M169)PID INTEGRIN2 PATHWAY	(M5916)HALLMARK APICAL SURFACE; (M5892)HALLMARK CHOLESTEROL HOMEOSTASIS; (M5890)HALLMARK TNFA SIGNALING VIA NFKB	0.0	0.0	0.0	0.0	1.0	0.0	0.0	0.0	1.0	0.0	0.0	0.0	0.0	1.0	0.0	1.0	0.0	0.0	1.0	0.0
ZFYVE9	9372	symbol	H. sapiens	9372	H. sapiens	ZFYVE9	zinc finger FYVE-type containing 9	GO:0007179 transforming growth factor beta receptor signaling pathway;GO:0071560 cellular response to transforming growth factor beta stimulus;GO:0071559 response to transforming growth factor beta		Predicted intracellular proteins	Cytosol;Vesicles (Enhanced)		(M286)PID TGFBR PATHWAY		0.0	0.0	0.0	0.0	0.0	0.0	0.0	0.0	0.0	0.0	0.0	0.0	1.0	0.0	0.0	0.0	0.0	0.0	0.0	0.0
DDB2	1643	symbol	H. sapiens	1643	H. sapiens	DDB2	damage specific DNA binding protein 2	GO:0006290 pyrimidine dimer repair;GO:0070914 UV-damage excision repair;GO:0035518 histone H2A monoubiquitination		Human disease related genes:Congenital malformations:Other congenital malformations; Human disease related genes:Congenital malformations:Congenital malformations of skin; Disease related genes; Predicted intracellular proteins; Cancer-related genes:Candidate cancer biomarkers	Cell Junctions;Nucleoplasm (Supported)		(M145)PID P53 DOWNSTREAM PATHWAY	(M5898)HALLMARK DNA REPAIR; (M5939)HALLMARK P53 PATHWAY	0.0	0.0	0.0	0.0	0.0	0.0	0.0	0.0	0.0	0.0	0.0	0.0	0.0	0.0	0.0	1.0	0.0	0.0	0.0	0.0
CTSL	1514	symbol	H. sapiens	1514	H. sapiens	CTSL	cathepsin L	GO:0039654 fusion of virus membrane with host endosome membrane;GO:0034230 enkephalin processing;GO:0060309 elastin catabolic process		ENZYME proteins:Hydrolases; Enzymes; Peptidases:Cysteine-type peptidases; Predicted intracellular proteins; Cancer-related genes:Candidate cancer biomarkers	Golgi apparatus;Vesicles (Approved)	L-cysteic acid; Felbinac; Fostamatinib	(M3468)NABA ECM REGULATORS; (M5885)NABA MATRISOME ASSOCIATED; (M5889)NABA MATRISOME	(M5921)HALLMARK COMPLEMENT	0.0	0.0	0.0	0.0	0.0	0.0	1.0	0.0	0.0	0.0	0.0	0.0	1.0	0.0	0.0	1.0	0.0	0.0	0.0	0.0
NCKAP5	344148	symbol	H. sapiens	344148	H. sapiens	NCKAP5	NCK associated protein 5	GO:0007019 microtubule depolymerization;GO:0051261 protein depolymerization;GO:0031109 microtubule polymerization or depolymerization		Predicted intracellular proteins	Nucleoli (Approved); Additional: Cytosol;Golgi apparatus;Plasma membrane				0.0	0.0	0.0	0.0	0.0	0.0	0.0	0.0	0.0	0.0	0.0	0.0	0.0	0.0	0.0	0.0	0.0	0.0	0.0	0.0
HTRA1	5654	symbol	H. sapiens	5654	H. sapiens	HTRA1	HtrA serine peptidase 1	GO:0060718 chorionic trophoblast cell differentiation;GO:0097187 dentinogenesis;GO:0060717 chorion development		Peptidases:Serine-type peptidases; Predicted intracellular proteins; Human disease related genes:Congenital malformations:Congenital malformations of the nervous system; Predicted secreted proteins; Human disease related genes:Nervous system diseases:Eye disease; Disease related genes; Potential drug targets; Enzymes	Plasma membrane (Supported)		(M3468)NABA ECM REGULATORS; (M5885)NABA MATRISOME ASSOCIATED; (M5889)NABA MATRISOME	(M5946)HALLMARK COAGULATION; (M5930)HALLMARK EPITHELIAL MESENCHYMAL TRANSITION	0.0	0.0	0.0	0.0	0.0	0.0	0.0	0.0	0.0	0.0	0.0	0.0	0.0	0.0	0.0	0.0	0.0	1.0	0.0	0.0
STRBP	55342	symbol	H. sapiens	55342	H. sapiens	STRBP	spermatid perinuclear RNA binding protein	GO:0007638 mechanosensory behavior;GO:0007286 spermatid development;GO:0048515 spermatid differentiation		Predicted intracellular proteins				(M5951)HALLMARK SPERMATOGENESIS	0.0	0.0	0.0	0.0	0.0	0.0	0.0	0.0	0.0	0.0	0.0	0.0	0.0	0.0	0.0	0.0	0.0	0.0	0.0	0.0
KBTBD12	166348	symbol	H. sapiens	166348	H. sapiens	KBTBD12	kelch repeat and BTB domain containing 12			Predicted intracellular proteins					0.0	0.0	0.0	0.0	0.0	0.0	0.0	0.0	0.0	0.0	0.0	0.0	0.0	0.0	0.0	0.0	0.0	0.0	0.0	0.0
CARD11	84433	symbol	H. sapiens	84433	H. sapiens	CARD11	caspase recruitment domain family member 11	GO:0046710 GDP metabolic process;GO:0038202 TORC1 signaling;GO:0050862 positive regulation of T cell receptor signaling pathway		Cancer-related genes:Mutated cancer genes; Disease related genes; Human disease related genes:Cancers:Cancers of haematopoietic and lymphoid tissues; Human disease related genes:Immune system diseases:Primary immunodeficiency; Predicted intracellular proteins			(M88)PID CD8 TCR PATHWAY; (M10)PID BCR 5PATHWAY; (M34)PID TCR PATHWAY		0.0	1.0	0.0	0.0	1.0	0.0	1.0	1.0	0.0	0.0	0.0	0.0	0.0	0.0	0.0	0.0	0.0	0.0	0.0	0.0
SLC25A29	123096	symbol	H. sapiens	123096	H. sapiens	SLC25A29	solute carrier family 25 member 29	GO:1990575 mitochondrial L-ornithine transmembrane transport;GO:1903352 L-ornithine transmembrane transport;GO:1902022 L-lysine transport		Predicted intracellular proteins; Transporters:Electrochemical Potential-driven transporters		Levocarnitine			0.0	1.0	0.0	1.0	0.0	1.0	0.0	0.0	0.0	0.0	0.0	0.0	0.0	0.0	0.0	0.0	0.0	0.0	0.0	0.0
B2M	567	symbol	H. sapiens	567	H. sapiens	B2M	beta-2-microglobulin	GO:0002481 antigen processing and presentation of exogenous protein antigen via MHC class Ib, TAP-dependent;GO:0071283 cellular response to iron(III) ion;GO:1904432 regulation of ferrous iron binding		Human disease related genes:Nervous system diseases:Neurodegenerative diseases; Transporters; Predicted secreted proteins; Cancer-related genes:Mutated cancer genes; Disease related genes; Human disease related genes:Cancers:Cancers of haematopoietic and lymphoid tissues; Human disease related genes:Cardiovascular diseases:Hematologic diseases; Cancer-related genes:Mutational cancer driver genes;…	Golgi apparatus;Plasma membrane (Enhanced); Additional: Cytosol	3-Indolebutyric Acid; N-Formylmethionine; Copper	(M88)PID CD8 TCR PATHWAY; (M54)PID IL12 2PATHWAY; (M272)PID CD8 TCR DOWNSTREAM PATHWAY	(M5911)HALLMARK INTERFERON ALPHA RESPONSE; (M5908)HALLMARK ANDROGEN RESPONSE; (M5913)HALLMARK INTERFERON GAMMA RESPONSE	0.0	0.0	0.0	0.0	1.0	1.0	1.0	1.0	0.0	0.0	0.0	0.0	1.0	1.0	0.0	0.0	0.0	0.0	1.0	0.0
LINC00578	100505566	symbol	H. sapiens	100505566	H. sapiens	LINC00578	long intergenic non-protein coding RNA 578								0.0	0.0	0.0	0.0	0.0	0.0	0.0	0.0	0.0	0.0	0.0	0.0	0.0	0.0	0.0	0.0	0.0	0.0	0.0	0.0
MRC1	4360	symbol	H. sapiens	4360	H. sapiens	MRC1	mannose receptor C-type 1	GO:0071353 cellular response to interleukin-4;GO:0070670 response to interleukin-4;GO:0071346 cellular response to interferon-gamma		FDA approved drug targets:Small molecule drugs; CD markers		Technetium Tc-99m tilmanocept			0.0	0.0	0.0	0.0	0.0	0.0	0.0	0.0	0.0	0.0	0.0	0.0	1.0	0.0	0.0	0.0	0.0	0.0	0.0	0.0
LITAF	9516	symbol	H. sapiens	9516	H. sapiens	LITAF	lipopolysaccharide induced TNF factor	GO:1901223 negative regulation of NIK/NF-kappaB signaling;GO:1901222 regulation of NIK/NF-kappaB signaling;GO:0043123 positive regulation of I-kappaB kinase/NF-kappaB signaling		Disease related genes; Human disease related genes:Nervous system diseases:Neurodegenerative diseases; Predicted intracellular proteins	Nucleoplasm (Supported); Additional: Golgi apparatus;Vesicles			(M5890)HALLMARK TNFA SIGNALING VIA NFKB	0.0	0.0	0.0	0.0	0.0	0.0	0.0	0.0	0.0	0.0	0.0	0.0	0.0	0.0	0.0	0.0	0.0	0.0	0.0	0.0
TMEM163	81615	symbol	H. sapiens	81615	H. sapiens	TMEM163	transmembrane protein 163	GO:0062111 zinc ion import into organelle;GO:0099180 zinc ion import into synaptic vesicle;GO:0071577 zinc ion transmembrane transport		Transporters:Electrochemical Potential-driven transporters					0.0	0.0	0.0	0.0	0.0	1.0	0.0	0.0	0.0	0.0	0.0	0.0	0.0	0.0	0.0	0.0	0.0	0.0	0.0	0.0
PAK1	5058	symbol	H. sapiens	5058	H. sapiens	PAK1	p21 (RAC1) activated kinase 1	GO:0060244 negative regulation of cell proliferation involved in contact inhibition;GO:0090063 positive regulation of microtubule nucleation;GO:0060242 contact inhibition	STE Ser/Thr protein kinase family	RAS pathway related proteins; Predicted intracellular proteins; ENZYME proteins:Transferases; Disease related genes; Kinases:STE Ser/Thr protein kinases; Potential drug targets; Enzymes; Human disease related genes:Other diseases:Mental and behavioural disorders	Cytosol;Plasma membrane (Supported)	Fostamatinib	(M273)PID EPHA2 FWD PATHWAY; (M268)PID S1P S1P2 PATHWAY; (M76)PID P38 ALPHA BETA PATHWAY	(M5902)HALLMARK APOPTOSIS	0.0	0.0	1.0	0.0	0.0	1.0	1.0	0.0	0.0	1.0	1.0	1.0	1.0	0.0	1.0	1.0	0.0	1.0	1.0	0.0
DYSF	8291	symbol	H. sapiens	8291	H. sapiens	DYSF	dysferlin	GO:0002280 monocyte activation involved in immune response;GO:0033292 T-tubule organization;GO:0042117 monocyte activation		Disease related genes; Human disease related genes:Musculoskeletal diseases:Muscular diseases; Transporters:Transporter channels and pores; Potential drug targets	Centriolar satellite;Plasma membrane (Supported)				0.0	0.0	0.0	0.0	0.0	0.0	1.0	0.0	0.0	0.0	0.0	0.0	0.0	0.0	0.0	0.0	0.0	0.0	0.0	0.0
EML1	2009	symbol	H. sapiens	2009	H. sapiens	EML1	EMAP like 1	GO:0007405 neuroblast proliferation;GO:0061351 neural precursor cell proliferation;GO:0002244 hematopoietic progenitor cell differentiation		Disease related genes; Predicted intracellular proteins					0.0	0.0	0.0	0.0	1.0	0.0	1.0	0.0	0.0	0.0	0.0	0.0	0.0	0.0	0.0	0.0	0.0	0.0	0.0	0.0
HEG1	57493	symbol	H. sapiens	57493	H. sapiens	HEG1	heart development protein with EGF like domains 1	GO:0003017 lymph circulation;GO:2000299 negative regulation of Rho-dependent protein serine/threonine kinase activity;GO:0090271 positive regulation of fibroblast growth factor production		Predicted intracellular proteins	Vesicles (Approved); Additional: Plasma membrane				1.0	0.0	0.0	0.0	0.0	0.0	0.0	0.0	0.0	1.0	1.0	0.0	0.0	0.0	0.0	0.0	0.0	0.0	0.0	0.0
GPR183	1880	symbol	H. sapiens	1880	H. sapiens	GPR183	G protein-coupled receptor 183	GO:0036145 dendritic cell homeostasis;GO:2000458 regulation of astrocyte chemotaxis;GO:0061470 T follicular helper cell differentiation		G-protein coupled receptors:GPCRs excl olfactory receptors				(M5890)HALLMARK TNFA SIGNALING VIA NFKB; (M5932)HALLMARK INFLAMMATORY RESPONSE	0.0	0.0	0.0	0.0	1.0	0.0	1.0	0.0	0.0	0.0	0.0	0.0	0.0	0.0	0.0	1.0	0.0	0.0	1.0	1.0
DLEU7-AS1	100874074	symbol	H. sapiens	100874074	H. sapiens	DLEU7-AS1	DLEU7 antisense RNA 1								0.0	0.0	0.0	0.0	0.0	0.0	0.0	0.0	0.0	0.0	0.0	0.0	0.0	0.0	0.0	0.0	0.0	0.0	0.0	0.0
MAMDC2	256691	symbol	H. sapiens	256691	H. sapiens	MAMDC2	MAM domain containing 2			Predicted secreted proteins	Nuclear speckles;Plasma membrane (Approved)				0.0	0.0	0.0	0.0	0.0	0.0	0.0	0.0	0.0	0.0	0.0	0.0	0.0	0.0	0.0	0.0	0.0	0.0	0.0	0.0
MEIS1	4211	symbol	H. sapiens	4211	H. sapiens	MEIS1	Meis homeobox 1	GO:0060216 definitive hemopoiesis;GO:0002089 lens morphogenesis in camera-type eye;GO:0035855 megakaryocyte development		Disease related genes; Transcription factors:Helix-turn-helix domains; Predicted intracellular proteins	Nucleoplasm (Supported)			(M5901)HALLMARK G2M CHECKPOINT	0.0	0.0	0.0	0.0	0.0	0.0	1.0	1.0	0.0	1.0	0.0	0.0	0.0	0.0	0.0	0.0	0.0	0.0	0.0	0.0
ABCG1	9619	symbol	H. sapiens	9619	H. sapiens	ABCG1	ATP binding cassette subfamily G member 1	GO:0071403 cellular response to high density lipoprotein particle stimulus;GO:0034436 glycoprotein transport;GO:0045542 positive regulation of cholesterol biosynthetic process		Predicted intracellular proteins; Transporters:Primary Active Transporters	Golgi apparatus;Vesicles (Supported)	ATP			0.0	0.0	0.0	1.0	0.0	0.0	0.0	0.0	0.0	0.0	0.0	0.0	0.0	0.0	0.0	0.0	0.0	0.0	0.0	0.0
APBB1IP	54518	symbol	H. sapiens	54518	H. sapiens	APBB1IP	amyloid beta precursor protein binding family B member 1 interacting protein	GO:0002291 T cell activation via T cell receptor contact with antigen bound to MHC molecule on antigen presenting cell;GO:0002286 T cell activation involved in immune response;GO:0002285 lymphocyte activation involved in immune response		Predicted intracellular proteins	Cytosol;Plasma membrane (Enhanced)				0.0	0.0	0.0	0.0	1.0	0.0	1.0	0.0	1.0	0.0	0.0	0.0	0.0	0.0	0.0	0.0	0.0	0.0	0.0	0.0
MT-CYB	4519	gene_synonym	H. sapiens	4519	H. sapiens	CYTB	cytochrome b	GO:0006122 mitochondrial electron transport, ubiquinol to cytochrome c;GO:0019646 aerobic electron transport chain;GO:0042773 ATP synthesis coupled electron transport		Disease related genes; Human disease related genes:Nervous system diseases:Neurodegenerative diseases; Human disease related genes:Congenital disorders of metabolism:Mitochondrial diseases	Mitochondria (Supported)	2-Hexyloxy-6-Hydroxymethyl-Tetrahydro-Pyran-3,4,5-Triol; 6-Hydroxy-5-undecyl-4,7-benzothiazoledione; Azoxystrobin; 5-Heptyl-6-hydroxy-1,3-benzothiazole-4,7-dione; (5S)-3-ANILINO-5-(2,4-DIFLUOROPHENYL)-5-METHYL-1,3-OXAZOLIDINE-2,4-DIONE; (S)-famoxadone; METHYL (2Z)-3-METHOXY-2-{2-[(E)-2-PHENYLVINYL]PHENYL}ACRYLATE; 2-Nonyl-4-quinolinol 1-oxide; Ubiquinone Q2			0.0	1.0	0.0	0.0	0.0	1.0	0.0	0.0	0.0	0.0	0.0	0.0	0.0	0.0	0.0	0.0	1.0	0.0	0.0	0.0
NPC1	4864	symbol	H. sapiens	4864	H. sapiens	NPC1	NPC intracellular cholesterol transporter 1	GO:0032367 intracellular cholesterol transport;GO:0071404 cellular response to low-density lipoprotein particle stimulus;GO:0032366 intracellular sterol transport		Disease related genes; Human disease related genes:Congenital disorders of metabolism:Lysosomal storage diseases; Potential drug targets; Transporters:Electrochemical Potential-driven transporters	Nucleoplasm;Vesicles (Supported)			(M5948)HALLMARK BILE ACID METABOLISM; (M5934)HALLMARK XENOBIOTIC METABOLISM	0.0	0.0	0.0	1.0	0.0	0.0	0.0	0.0	0.0	0.0	0.0	0.0	1.0	0.0	0.0	0.0	0.0	0.0	0.0	0.0
IRS2	8660	symbol	H. sapiens	8660	H. sapiens	IRS2	insulin receptor substrate 2	GO:0010748 negative regulation of long-chain fatty acid import across plasma membrane;GO:0140213 negative regulation of long-chain fatty acid import into cell;GO:0010746 regulation of long-chain fatty acid import across plasma membrane		Cancer-related genes:Mutational cancer driver genes; Predicted intracellular proteins	Cytosol (Supported); Additional: Aggresome		(M1718)SIG IL4RECEPTOR IN B LYPHOCYTES; (M125)PID IGF1 PATHWAY; (M233)PID EPO PATHWAY	(M5890)HALLMARK TNFA SIGNALING VIA NFKB; (M5891)HALLMARK HYPOXIA; (M5937)HALLMARK GLYCOLYSIS	0.0	1.0	0.0	1.0	1.0	1.0	0.0	0.0	0.0	0.0	0.0	1.0	0.0	0.0	1.0	0.0	1.0	0.0	0.0	0.0
PDE4DIP	9659	symbol	H. sapiens	9659	H. sapiens	PDE4DIP	phosphodiesterase 4D interacting protein	GO:1903358 regulation of Golgi organization;GO:0033043 regulation of organelle organization;GO:0065003 protein-containing complex assembly		Disease related genes; Cancer-related genes; Predicted intracellular proteins	Golgi apparatus (Supported)			(M5909)HALLMARK MYOGENESIS	0.0	0.0	0.0	0.0	0.0	0.0	0.0	0.0	0.0	0.0	0.0	0.0	0.0	0.0	0.0	0.0	0.0	0.0	0.0	0.0
ZNF804A	91752	symbol	H. sapiens	91752	H. sapiens	ZNF804A	zinc finger protein 804A	GO:1902952 positive regulation of dendritic spine maintenance;GO:1902950 regulation of dendritic spine maintenance;GO:0099175 regulation of postsynapse organization		Predicted intracellular proteins	Endoplasmic reticulum (Approved)				0.0	0.0	0.0	0.0	0.0	0.0	0.0	0.0	0.0	0.0	0.0	0.0	0.0	0.0	0.0	0.0	0.0	0.0	1.0	0.0
NDST1	3340	symbol	H. sapiens	3340	H. sapiens	NDST1	N-deacetylase and N-sulfotransferase 1	GO:0015014 heparan sulfate proteoglycan biosynthetic process, polysaccharide chain biosynthetic process;GO:0006477 protein sulfation;GO:0048702 embryonic neurocranium morphogenesis		Predicted intracellular proteins; ENZYME proteins:Transferases; Disease related genes; Potential drug targets; Enzymes; Human disease related genes:Other diseases:Mental and behavioural disorders		Adenosine 3',5'-diphosphate		(M5891)HALLMARK HYPOXIA	0.0	0.0	0.0	0.0	1.0	0.0	0.0	0.0	0.0	1.0	0.0	0.0	0.0	0.0	0.0	0.0	0.0	0.0	0.0	0.0
MT-ND1	4535	gene_synonym	H. sapiens	4535	H. sapiens	ND1	NADH dehydrogenase subunit 1	GO:0006120 mitochondrial electron transport, NADH to ubiquinone;GO:0010257 NADH dehydrogenase complex assembly;GO:0032981 mitochondrial respiratory chain complex I assembly		Human disease related genes:Nervous system diseases:Neurodegenerative diseases; Disease related genes; ENZYME proteins; Enzymes; FDA approved drug targets:Small molecule drugs; Human disease related genes:Congenital disorders of metabolism:Mitochondrial diseases		NADH; Methoxyflurane; Halothane; Desflurane; Sevoflurane; N-Formylmethionine; Phenethyl Isothiocyanate			0.0	1.0	0.0	0.0	0.0	0.0	0.0	0.0	0.0	0.0	0.0	0.0	0.0	0.0	0.0	0.0	0.0	0.0	0.0	0.0
ARAP2	116984	symbol	H. sapiens	116984	H. sapiens	ARAP2	ArfGAP with RhoGAP domain, ankyrin repeat and PH domain 2	GO:0043547 positive regulation of GTPase activity;GO:0043087 regulation of GTPase activity;GO:0051345 positive regulation of hydrolase activity		Predicted intracellular proteins	Focal adhesion sites (Approved); Additional: Actin filaments		(M86)PID ARF6 PATHWAY		0.0	0.0	1.0	0.0	0.0	0.0	0.0	0.0	0.0	0.0	0.0	0.0	0.0	0.0	0.0	0.0	0.0	0.0	0.0	0.0
MT-ND2	4536	gene_synonym	H. sapiens	4536	H. sapiens	ND2	NADH dehydrogenase subunit 2	GO:0006120 mitochondrial electron transport, NADH to ubiquinone;GO:0010257 NADH dehydrogenase complex assembly;GO:0032981 mitochondrial respiratory chain complex I assembly		Human disease related genes:Nervous system diseases:Neurodegenerative diseases; Disease related genes; ENZYME proteins; Potential drug targets; Enzymes; Human disease related genes:Congenital disorders of metabolism:Mitochondrial diseases		NADH			0.0	1.0	0.0	0.0	0.0	0.0	0.0	0.0	0.0	0.0	0.0	0.0	0.0	0.0	0.0	0.0	0.0	0.0	0.0	0.0
PSD3	23362	symbol	H. sapiens	23362	H. sapiens	PSD3	pleckstrin and Sec7 domain containing 3	GO:0032012 regulation of ARF protein signal transduction;GO:0046578 regulation of Ras protein signal transduction;GO:0051056 regulation of small GTPase mediated signal transduction		Predicted intracellular proteins	Nucleoplasm;Vesicles (Approved); Additional: Cytosol				1.0	0.0	0.0	0.0	0.0	0.0	0.0	0.0	0.0	0.0	0.0	0.0	0.0	0.0	0.0	0.0	0.0	0.0	0.0	0.0
TBC1D14	57533	symbol	H. sapiens	57533	H. sapiens	TBC1D14	TBC1 domain family member 14	GO:0071955 recycling endosome to Golgi transport;GO:2000785 regulation of autophagosome assembly;GO:0044088 regulation of vacuole organization		Predicted intracellular proteins	Golgi apparatus;Vesicles (Supported); Additional: Nucleoplasm				0.0	0.0	0.0	0.0	0.0	0.0	0.0	0.0	0.0	0.0	0.0	0.0	0.0	0.0	0.0	0.0	0.0	0.0	0.0	0.0
A2M	2	symbol	H. sapiens	2	H. sapiens	A2M	alpha-2-macroglobulin	GO:0001868 regulation of complement activation, lectin pathway;GO:0001869 negative regulation of complement activation, lectin pathway;GO:0010037 response to carbon dioxide		Predicted secreted proteins; Cancer-related genes:Candidate cancer biomarkers; Candidate cardiovascular disease genes		Becaplermin; Cisplatin; Bacitracin; Zinc; Ocriplasmin; Silver; Zinc acetate; Zinc chloride; Zinc sulfate, unspecified form	(M183)PID IL6 7 PATHWAY; (M3468)NABA ECM REGULATORS; (M5885)NABA MATRISOME ASSOCIATED	(M5897)HALLMARK IL6 JAK STAT3 SIGNALING; (M5946)HALLMARK COAGULATION	0.0	0.0	0.0	1.0	0.0	0.0	0.0	0.0	1.0	0.0	0.0	0.0	0.0	0.0	0.0	0.0	0.0	1.0	0.0	0.0
RSRP1	57035	symbol	H. sapiens	57035	H. sapiens	RSRP1	arginine and serine rich protein 1			Predicted intracellular proteins	Nucleoplasm (Approved)				0.0	0.0	0.0	0.0	0.0	0.0	0.0	0.0	0.0	0.0	0.0	0.0	0.0	0.0	0.0	0.0	0.0	0.0	0.0	0.0
DOCK3	1795	symbol	H. sapiens	1795	H. sapiens	DOCK3	dedicator of cytokinesis 3	GO:1903997 positive regulation of non-membrane spanning protein tyrosine kinase activity;GO:1903995 regulation of non-membrane spanning protein tyrosine kinase activity;GO:0061098 positive regulation of protein tyrosine kinase activity		Disease related genes; Predicted intracellular proteins; Human disease related genes:Other diseases:Mental and behavioural disorders	Cytosol (Enhanced)				1.0	0.0	1.0	0.0	0.0	0.0	0.0	0.0	1.0	0.0	0.0	0.0	0.0	0.0	1.0	1.0	0.0	0.0	0.0	0.0
CYRIB	51571	gene_synonym	H. sapiens	51571	H. sapiens	CYRIB	CYFIP related Rac1 interactor B	GO:2000567 regulation of memory T cell activation;GO:2000568 positive regulation of memory T cell activation;GO:2000114 regulation of establishment of cell polarity		Predicted intracellular proteins	Nucleoplasm (Approved); Additional: Cytosol				1.0	0.0	0.0	0.0	1.0	0.0	0.0	0.0	1.0	0.0	1.0	0.0	0.0	0.0	0.0	0.0	0.0	0.0	1.0	0.0
FKBP5	2289	symbol	H. sapiens	2289	H. sapiens	FKBP5	FKBP prolyl isomerase 5	GO:0000413 protein peptidyl-prolyl isomerization;GO:0018208 peptidyl-proline modification;GO:0061077 chaperone-mediated protein folding		ENZYME proteins:Isomerase; Enzymes; Predicted intracellular proteins; Cancer-related genes:Candidate cancer biomarkers; Human disease related genes:Other diseases:Mental and behavioural disorders	Nucleoplasm (Enhanced)		(M115)PID REG GR PATHWAY	(M5908)HALLMARK ANDROGEN RESPONSE; (M5906)HALLMARK ESTROGEN RESPONSE EARLY; (M5907)HALLMARK ESTROGEN RESPONSE LATE	0.0	0.0	0.0	1.0	0.0	0.0	0.0	0.0	0.0	0.0	0.0	0.0	0.0	0.0	0.0	0.0	0.0	0.0	0.0	0.0
SGPL1	8879	symbol	H. sapiens	8879	H. sapiens	SGPL1	sphingosine-1-phosphate lyase 1	GO:0001553 luteinization;GO:0033327 Leydig cell differentiation;GO:0010761 fibroblast migration		Predicted intracellular proteins; ENZYME proteins:Lyases; Disease related genes; Potential drug targets; Human disease related genes:Urinary system diseases:Kidney diseases; Enzymes	Endoplasmic reticulum (Supported)	Pyridoxal phosphate	(M155)PID S1P META PATHWAY		0.0	0.0	0.0	0.0	0.0	0.0	1.0	0.0	0.0	1.0	0.0	0.0	0.0	0.0	0.0	0.0	0.0	0.0	1.0	0.0
MS4A4E	643680	symbol	H. sapiens	643680	H. sapiens	MS4A4E	membrane spanning 4-domains A4E								0.0	0.0	0.0	0.0	0.0	0.0	0.0	0.0	0.0	0.0	0.0	0.0	0.0	0.0	0.0	0.0	0.0	0.0	0.0	0.0
NFE2L2	4780	symbol	H. sapiens	4780	H. sapiens	NFE2L2	NFE2 like bZIP transcription factor 2	GO:1903788 positive regulation of glutathione biosynthetic process;GO:0009407 toxin catabolic process;GO:0043387 mycotoxin catabolic process		Transcription factors:Basic domains; Human disease related genes:Cancers:Cancers of the digestive system; Cancer-related genes:Mutated cancer genes; Disease related genes; Cancer-related genes:Mutational cancer driver genes; Predicted intracellular proteins	Nucleoplasm;Plasma membrane (Approved); Additional: Cytosol			(M5890)HALLMARK TNFA SIGNALING VIA NFKB	0.0	1.0	0.0	0.0	0.0	1.0	0.0	0.0	0.0	1.0	0.0	0.0	0.0	0.0	1.0	0.0	1.0	1.0	1.0	0.0
ALOX5	240	symbol	H. sapiens	240	H. sapiens	ALOX5	arachidonate 5-lipoxygenase	GO:1901753 leukotriene A4 biosynthetic process;GO:1901751 leukotriene A4 metabolic process;GO:0002538 arachidonic acid metabolite production involved in inflammatory response		ENZYME proteins:Oxidoreductases; Predicted intracellular proteins; Enzymes; FDA approved drug targets:Small molecule drugs	Nucleoplasm (Supported)	Vitamin E; Masoprocol; Aminosalicylic acid; Mesalazine; Montelukast; Diethylcarbamazine; Zileuton; Sulfasalazine; Meclofenamic acid; Balsalazide; Minocycline; Hyperforin; Resveratrol; Licofelone; MLN-977; Morniflumate; Diacerein; Fostamatinib; Rhein; alpha-Tocopherol succinate; D-alpha-Tocopherol acetate			0.0	0.0	0.0	0.0	1.0	1.0	0.0	0.0	0.0	0.0	0.0	0.0	0.0	1.0	0.0	0.0	0.0	1.0	1.0	1.0
P2RY8	286530	symbol	H. sapiens	286530	H. sapiens	P2RY8	P2Y receptor family member 8	GO:0035589 G protein-coupled purinergic nucleotide receptor signaling pathway;GO:0035590 purinergic nucleotide receptor signaling pathway;GO:0051482 positive regulation of cytosolic calcium ion concentration involved in phospholipase C-activating G protein-coupled signaling pathway		Cancer-related genes; G-protein coupled receptors:GPCRs excl olfactory receptors; G-protein coupled receptors:Adenosine and adenine nucleotide receptors; Predicted intracellular proteins					1.0	0.0	0.0	0.0	0.0	0.0	0.0	0.0	0.0	0.0	0.0	0.0	0.0	0.0	0.0	0.0	0.0	0.0	0.0	0.0
SLC43A2	124935	symbol	H. sapiens	124935	H. sapiens	SLC43A2	solute carrier family 43 member 2	GO:0060357 regulation of leucine import;GO:0060358 negative regulation of leucine import;GO:1905532 regulation of leucine import across plasma membrane		Transporters:Electrochemical Potential-driven transporters					0.0	0.0	0.0	1.0	0.0	1.0	0.0	0.0	0.0	0.0	0.0	0.0	0.0	0.0	0.0	0.0	0.0	0.0	0.0	0.0
ZFPM2-AS1	102723356	symbol	H. sapiens	102723356	H. sapiens	ZFPM2-AS1	ZFPM2 antisense RNA 1								0.0	0.0	0.0	0.0	0.0	0.0	0.0	0.0	0.0	0.0	0.0	0.0	0.0	0.0	0.0	0.0	0.0	0.0	0.0	0.0
MTSS1	9788	symbol	H. sapiens	9788	H. sapiens	MTSS1	MTSS I-BAR domain containing 1	GO:0072160 nephron tubule epithelial cell differentiation;GO:0030035 microspike assembly;GO:2001013 epithelial cell proliferation involved in renal tubule morphogenesis		Predicted intracellular proteins	Cytosol;Plasma membrane (Approved)		(M219)PID HEDGEHOG GLI PATHWAY		0.0	0.0	0.0	0.0	1.0	0.0	0.0	0.0	0.0	1.0	1.0	0.0	0.0	0.0	0.0	0.0	0.0	0.0	0.0	0.0
SLIT2	9353	symbol	H. sapiens	9353	H. sapiens	SLIT2	slit guidance ligand 2	GO:0021972 corticospinal neuron axon guidance through spinal cord;GO:0050924 positive regulation of negative chemotaxis;GO:0050929 induction of negative chemotaxis		Predicted intracellular proteins; Predicted secreted proteins			(M33)PID GLYPICAN 1PATHWAY; (M3008)NABA ECM GLYCOPROTEINS; (M5884)NABA CORE MATRISOME	(M5915)HALLMARK APICAL JUNCTION; (M5930)HALLMARK EPITHELIAL MESENCHYMAL TRANSITION	1.0	0.0	0.0	0.0	0.0	0.0	0.0	0.0	0.0	1.0	1.0	1.0	0.0	0.0	1.0	0.0	0.0	1.0	1.0	0.0
CEBPB	1051	symbol	H. sapiens	1051	H. sapiens	CEBPB	CCAAT enhancer binding protein beta	GO:2000120 positive regulation of sodium-dependent phosphate transport;GO:1901329 regulation of odontoblast differentiation;GO:2000118 regulation of sodium-dependent phosphate transport		Transcription factors:Basic domains; Predicted intracellular proteins	Nucleoplasm (Enhanced)	Quercetin	(M182)PID IL3 PATHWAY; (M229)PID P38 ALPHA BETA DOWNSTREAM PATHWAY; (M161)PID IFNG PATHWAY	(M5922)HALLMARK UNFOLDED PROTEIN RESPONSE; (M5890)HALLMARK TNFA SIGNALING VIA NFKB; (M5921)HALLMARK COMPLEMENT	0.0	0.0	0.0	0.0	1.0	1.0	1.0	1.0	0.0	0.0	0.0	0.0	0.0	0.0	1.0	0.0	0.0	1.0	0.0	0.0
SND1	27044	symbol	H. sapiens	27044	H. sapiens	SND1	staphylococcal nuclease and tudor domain containing 1	GO:0010587 miRNA catabolic process;GO:0010586 miRNA metabolic process;GO:0034661 ncRNA catabolic process		Cancer-related genes; Predicted intracellular proteins; Enzymes; ENZYME proteins:Hydrolases	Cytosol (Enhanced)		(M195)PID CMYB PATHWAY		0.0	0.0	0.0	0.0	0.0	0.0	0.0	0.0	0.0	0.0	0.0	0.0	0.0	0.0	0.0	0.0	0.0	0.0	0.0	0.0
GLCCI1	113263	symbol	H. sapiens	113263	H. sapiens	GLCCI1	glucocorticoid induced 1			Predicted intracellular proteins	Nucleoli (Approved)				0.0	0.0	0.0	0.0	0.0	0.0	0.0	0.0	0.0	0.0	0.0	0.0	0.0	0.0	0.0	0.0	0.0	0.0	0.0	0.0
ZMYM2	7750	symbol	H. sapiens	7750	H. sapiens	ZMYM2	zinc finger MYM-type containing 2	GO:0008150 biological_process		Disease related genes; Cancer-related genes:Mutational cancer driver genes; Predicted intracellular proteins	Endoplasmic reticulum;Nucleoplasm (Approved)				0.0	0.0	0.0	0.0	0.0	0.0	0.0	0.0	0.0	0.0	0.0	0.0	0.0	0.0	0.0	0.0	0.0	0.0	0.0	0.0
IL15	3600	symbol	H. sapiens	3600	H. sapiens	IL15	interleukin 15	GO:0033078 extrathymic T cell differentiation;GO:0045062 extrathymic T cell selection;GO:0001866 NK T cell proliferation		Predicted intracellular proteins; Predicted secreted proteins; Cancer-related genes:Candidate cancer biomarkers	Nuclear speckles;Nucleoplasm (Supported)	Cefazolin	(M5883)NABA SECRETED FACTORS; (M5885)NABA MATRISOME ASSOCIATED; (M5889)NABA MATRISOME	(M5911)HALLMARK INTERFERON ALPHA RESPONSE; (M5913)HALLMARK INTERFERON GAMMA RESPONSE; (M5930)HALLMARK EPITHELIAL MESENCHYMAL TRANSITION	0.0	0.0	0.0	0.0	1.0	0.0	1.0	1.0	0.0	0.0	0.0	0.0	0.0	0.0	0.0	0.0	0.0	1.0	0.0	0.0
CACNA1A	773	symbol	H. sapiens	773	H. sapiens	CACNA1A	calcium voltage-gated channel subunit alpha1 A	GO:0098703 calcium ion import across plasma membrane;GO:1904646 cellular response to amyloid-beta;GO:1904645 response to amyloid-beta		Human disease related genes:Nervous system diseases:Neurodegenerative diseases; FDA approved drug targets:Small molecule drugs; Human disease related genes:Nervous system diseases:Other nervous and sensory system diseases; Voltage-gated ion channels:Voltage-Gated Calcium Channels; Transporters:Transporter channels and pores; Disease related genes; Predicted intracellular proteins; Human disease r…	Endoplasmic reticulum (Uncertain)	Verapamil; Loperamide; Bepridil; Ziconotide; Dotarizine; Bioallethrin		(M5942)HALLMARK UV RESPONSE DN	0.0	1.0	0.0	0.0	0.0	1.0	0.0	0.0	0.0	0.0	0.0	0.0	0.0	0.0	0.0	0.0	0.0	0.0	0.0	0.0
MTUS1	57509	symbol	H. sapiens	57509	H. sapiens	MTUS1	microtubule associated scaffold protein 1	GO:0010758 regulation of macrophage chemotaxis;GO:1905521 regulation of macrophage migration;GO:0002688 regulation of leukocyte chemotaxis		Disease related genes; Predicted intracellular proteins	Microtubules;Nucleoli (Enhanced)				0.0	0.0	0.0	0.0	0.0	0.0	0.0	0.0	0.0	0.0	0.0	0.0	0.0	0.0	0.0	0.0	0.0	0.0	1.0	0.0
SLC44A2	57153	symbol	H. sapiens	57153	H. sapiens	SLC44A2	solute carrier family 44 member 2	GO:0015871 choline transport;GO:0006656 phosphatidylcholine biosynthetic process;GO:0015695 organic cation transport		Predicted intracellular proteins; Transporters:Electrochemical Potential-driven transporters	Cell Junctions;Vesicles (Approved)				0.0	0.0	0.0	1.0	0.0	0.0	0.0	0.0	0.0	0.0	0.0	0.0	0.0	1.0	0.0	0.0	0.0	0.0	0.0	0.0
HCK	3055	symbol	H. sapiens	3055	H. sapiens	HCK	HCK proto-oncogene, Src family tyrosine kinase	GO:0002522 leukocyte migration involved in immune response;GO:0045728 respiratory burst after phagocytosis;GO:0002679 respiratory burst involved in defense response	Tyr protein kinase family	Predicted intracellular proteins; ENZYME proteins:Transferases; Disease related genes; Kinases:Tyr protein kinases; Potential drug targets; Enzymes	Vesicles (Supported); Additional: Cytosol;Plasma membrane	1-Ter-Butyl-3-P-Tolyl-1h-Pyrazolo[3,4-D]Pyrimidin-4-Ylamine; Phosphonotyrosine; Quercetin; Bosutinib; Fostamatinib	(M33)PID GLYPICAN 1PATHWAY; (M252)PID IL8 CXCR1 PATHWAY; (M76)PID P38 ALPHA BETA PATHWAY		0.0	0.0	1.0	0.0	0.0	0.0	1.0	0.0	0.0	0.0	1.0	0.0	0.0	0.0	0.0	1.0	0.0	1.0	0.0	1.0
PAX8-AS1	654433	symbol	H. sapiens	654433	H. sapiens	PAX8-AS1	PAX8 antisense RNA 1								0.0	0.0	0.0	0.0	0.0	0.0	0.0	0.0	0.0	0.0	0.0	0.0	0.0	0.0	0.0	0.0	0.0	0.0	0.0	0.0
PFKP	5214	symbol	H. sapiens	5214	H. sapiens	PFKP	phosphofructokinase, platelet	GO:0030388 fructose 1,6-bisphosphate metabolic process;GO:0006735 NADH regeneration;GO:0061621 canonical glycolysis		ENZYME proteins:Transferases; Predicted intracellular proteins; Enzymes	Cytosol (Supported)			(M5938)HALLMARK REACTIVE OXYGEN SPECIES PATHWAY; (M5891)HALLMARK HYPOXIA; (M5913)HALLMARK INTERFERON GAMMA RESPONSE	0.0	1.0	0.0	0.0	0.0	0.0	0.0	0.0	0.0	0.0	0.0	0.0	0.0	0.0	1.0	0.0	0.0	0.0	0.0	0.0
PEBP4	157310	symbol	H. sapiens	157310	H. sapiens	PEBP4	phosphatidylethanolamine binding protein 4			Predicted intracellular proteins; Predicted secreted proteins					0.0	0.0	0.0	0.0	0.0	0.0	0.0	0.0	0.0	0.0	0.0	0.0	0.0	0.0	0.0	0.0	0.0	0.0	0.0	0.0
ABCC6	368	symbol	H. sapiens	368	H. sapiens	ABCC6	ATP binding cassette subfamily C member 6	GO:0030505 inorganic diphosphate transport;GO:0071716 leukotriene transport;GO:1904383 response to sodium phosphate		Human disease related genes:Congenital malformations:Congenital malformations of skin; Disease related genes; ENZYME proteins; Transporters:Primary Active Transporters; Human disease related genes:Cardiovascular diseases:Vascular diseases; Potential drug targets; Enzymes; Cancer-related genes:Candidate cancer biomarkers	Plasma membrane (Supported); Additional: Nucleoplasm	ATP			0.0	1.0	0.0	1.0	0.0	0.0	0.0	0.0	0.0	0.0	0.0	0.0	0.0	0.0	0.0	0.0	0.0	0.0	0.0	0.0
KIF1B	23095	symbol	H. sapiens	23095	H. sapiens	KIF1B	kinesin family member 1B	GO:0007270 neuron-neuron synaptic transmission;GO:0007274 neuromuscular synaptic transmission;GO:0008089 anterograde axonal transport		Disease related genes; Human disease related genes:Nervous system diseases:Neurodegenerative diseases; Predicted intracellular proteins	Microtubules (Approved); Additional: Nucleoli fibrillar center			(M5910)HALLMARK PROTEIN SECRETION; (M5893)HALLMARK MITOTIC SPINDLE; (M5932)HALLMARK INFLAMMATORY RESPONSE	0.0	0.0	0.0	0.0	0.0	0.0	0.0	0.0	1.0	0.0	0.0	0.0	0.0	0.0	0.0	0.0	0.0	0.0	0.0	0.0
ZMAT3	64393	symbol	H. sapiens	64393	H. sapiens	ZMAT3	zinc finger matrin-type 3	GO:0040008 regulation of growth;GO:0006974 cellular response to DNA damage stimulus;GO:0006915 apoptotic process		Predicted intracellular proteins	Nucleoplasm (Supported)			(M5939)HALLMARK P53 PATHWAY	0.0	0.0	0.0	0.0	0.0	0.0	0.0	0.0	0.0	0.0	0.0	0.0	0.0	0.0	0.0	0.0	0.0	0.0	1.0	0.0
GNG7	2788	symbol	H. sapiens	2788	H. sapiens	GNG7	G protein subunit gamma 7	GO:0008277 regulation of G protein-coupled receptor signaling pathway;GO:0007186 G protein-coupled receptor signaling pathway;GO:0009966 regulation of signal transduction		RAS pathway related proteins; Predicted intracellular proteins					0.0	1.0	1.0	1.0	0.0	1.0	0.0	0.0	1.0	0.0	0.0	0.0	0.0	0.0	1.0	1.0	0.0	0.0	0.0	0.0
SCIN	85477	symbol	H. sapiens	85477	H. sapiens	SCIN	scinderin	GO:0045654 positive regulation of megakaryocyte differentiation;GO:0042989 sequestering of actin monomers;GO:0051014 actin filament severing		Predicted intracellular proteins	Plasma membrane (Approved); Additional: Cytosol				0.0	0.0	0.0	0.0	0.0	0.0	0.0	1.0	0.0	0.0	1.0	0.0	1.0	0.0	0.0	1.0	0.0	0.0	0.0	0.0
USP6NL	9712	symbol	H. sapiens	9712	H. sapiens	USP6NL	USP6 N-terminal like	GO:0035526 retrograde transport, plasma membrane to Golgi;GO:0048227 plasma membrane to endosome transport;GO:1903358 regulation of Golgi organization		Predicted intracellular proteins			(M164)PID ERBB1 DOWNSTREAM PATHWAY; (M186)PID PDGFRB PATHWAY		0.0	0.0	0.0	0.0	0.0	0.0	0.0	0.0	0.0	0.0	0.0	0.0	1.0	0.0	0.0	0.0	0.0	0.0	0.0	0.0
PDE9A	5152	symbol	H. sapiens	5152	H. sapiens	PDE9A	phosphodiesterase 9A	GO:0046069 cGMP catabolic process;GO:0009214 cyclic nucleotide catabolic process;GO:0046068 cGMP metabolic process		Predicted intracellular proteins; Enzymes; ENZYME proteins:Hydrolases	Cytosol (Supported); Additional: Nucleoplasm;Plasma membrane	gamma-Glutamyl[S-(2-iodobenzyl)cysteinyl]glycine; 3-isobutyl-1-methyl-7H-xanthine	(M151)PID AR TF PATHWAY		0.0	1.0	0.0	0.0	0.0	0.0	0.0	0.0	1.0	0.0	0.0	0.0	0.0	0.0	0.0	0.0	0.0	0.0	0.0	0.0
ZNF331	55422	symbol	H. sapiens	55422	H. sapiens	ZNF331	zinc finger protein 331	GO:0006357 regulation of transcription by RNA polymerase II;GO:0006355 regulation of transcription, DNA-templated;GO:1903506 regulation of nucleic acid-templated transcription		Cancer-related genes; Transcription factors:Zinc-coordinating DNA-binding domains; Predicted intracellular proteins	Nucleoplasm (Approved)				0.0	0.0	0.0	0.0	0.0	0.0	0.0	0.0	0.0	0.0	0.0	0.0	0.0	0.0	0.0	0.0	0.0	0.0	0.0	0.0
