# Supplementary material for: Mosaic loss of Chromosome Y in aged human microglia
Source: HighWire-hosted journal article supplement (doi:10.1101/gr.276409.121), 2022-08-30
Supplement: Supplemental_Table_S6.xlsx [file Supplemental_Table_S6.xlsx]

## Sheet: Description
Supplemental Table S6:
Information on the given tabs are found below
Summary of subtype-specific microglia LOY estimates split by cohort						subtype_cohort
Summary of subtype-specific microglia LOY estimates split by sample						subtype_sample

## Sheet: subtype_cohort
MG_subtype	LOY	NORMAL	TOTAL	LOY_prop	cohort
Pro-inflammatory	85	164	249	0.341365	syn12514624 DLPFC
Stressed	87	280	367	0.237057	syn12514624 DLPFC
DAM	51	171	222	0.22973	GSE167494 PFC
TAM	207	708	915	0.22623	GSE183068 PFC
Homeostatic	157	563	720	0.218056	GSE167494 PFC
Homeostatic	316	1163	1479	0.213658	syn12514624 DLPFC
CAM	27	117	144	0.1875	GSE106936 EC/SSC
DAM	30	141	171	0.175439	syn12514624 DLPFC
Homeostatic	1045	5709	6754	0.154723	GSE106936 EC/SSC
DAM	355	1960	2315	0.153348	GSE106936 EC/SSC
CRM	26	144	170	0.152941	GSE106936 EC/SSC
Pro-inflammatory	357	2036	2393	0.149185	GSE106936 EC/SSC
Cycling	35	203	238	0.147059	GSE106936 EC/SSC
CAM	24	148	172	0.139535	GSE174367 PFC
Cycling	10	64	74	0.135135	GSE183068 PFC
Monocyte	10	75	85	0.117647	GSE106936 EC/SSC
Pro-inflammatory	134	1132	1266	0.105845	GSE183068 PFC
Homeostatic	410	4274	4684	0.087532	GSE183068 PFC
CRM	67	755	822	0.0815085	GSE183068 PFC
CAM	7	83	90	0.0777778	GSE183068 PFC
Homeostatic	85	1234	1319	0.0644428	GSE174367 PFC
DAM	7	133	140	0.05	GSE174332 PFC
Pro-inflammatory	105	2008	2113	0.0496924	GSE178265 SN
Homeostatic	15	293	308	0.0487013	GSE174332 PFC
CAM	11	233	244	0.045082	GSE178265 SN
CAM	2	49	51	0.0392157	GSE148822 OTC/OC
CRM	52	1333	1385	0.0375451	GSE137444 TC
DAM	32	835	867	0.0369089	GSE178265 SN
Homeostatic	25	682	707	0.0353607	GSE148822 OTC/OC
Homeostatic	122	3494	3616	0.0337389	GSE137444 TC
Homeostatic	180	5353	5533	0.0325321	GSE178265 SN
IRM	28	836	864	0.0324074	GSE137444 TC
Stressed	28	1236	1264	0.0221519	GSE137444 TC
CAM	3	144	147	0.0204082	GSE137444 TC
Pro-inflammatory	3	145	148	0.0202703	GSE174367 PFC
DAM	4	196	200	0.02	GSE148822 OTC/OC
DAM	0	152	152	0	GSE174367 PFC
Cycling	0	77	77	0	GSE178265 SN
DAM	0	63	63	0	GSE183068 PFC

## Sheet: subtype_sample
MG_subtype	LOY	NORMAL	LOY_prop	ID	cohort	TOTAL
DAM	188	113	0.624585	GSM4886751	GSE106936 EC/SSC	301
Homeostatic	578	398	0.592213	GSM4886751	GSE106936 EC/SSC	976
Pro-inflammatory	133	99	0.573276	GSM4886751	GSE106936 EC/SSC	232
Cycling	20	16	0.555556	GSM4886751	GSE106936 EC/SSC	36
Pro-inflammatory	81	72	0.529412	GSM4886749	GSE106936 EC/SSC	153
CRM	14	13	0.518519	GSM4886751	GSE106936 EC/SSC	27
Pro-inflammatory	23	23	0.5	GSM5550481	GSE183068 PFC	46
Homeostatic	55	57	0.491071	GSM4886750	GSE106936 EC/SSC	112
Homeostatic	89	94	0.486339	GSM5550475	GSE183068 PFC	183
Pro-inflammatory	19	21	0.475	GSM4886750	GSE106936 EC/SSC	40
Homeostatic	50	57	0.46729	GSM5106120	GSE167494 PFC	107
Pro-inflammatory	19	24	0.44186	GSM5550475	GSE183068 PFC	43
DAM	18	23	0.439024	GSM5106120	GSE167494 PFC	41
Pro-inflammatory	22	29	0.431373	GSM4886748	GSE106936 EC/SSC	51
CRM	25	34	0.423729	GSM5550475	GSE183068 PFC	59
Homeostatic	167	228	0.422785	GSM4886749	GSE106936 EC/SSC	395
DAM	63	89	0.414474	GSM4886749	GSE106936 EC/SSC	152
Homeostatic	59	86	0.406897	GSM4886748	GSE106936 EC/SSC	145
Homeostatic	57	87	0.395833	GSM5550481	GSE183068 PFC	144
Homeostatic	60	95	0.387097	GSM5106119	GSE167494 PFC	155
Pro-inflammatory	85	146	0.367965	Microglia_MO_MCI3	syn12514624 DLPFC	231
DAM	16	34	0.32	GSM5106119	GSE167494 PFC	50
Homeostatic	16	35	0.313725	GSM5106098	GSE167494 PFC	51
DAM	13	32	0.288889	GSM4886748	GSE106936 EC/SSC	45
DAM	12	30	0.285714	GSM4886750	GSE106936 EC/SSC	42
Homeostatic	273	727	0.273	Microglia_MO_MCI3	syn12514624 DLPFC	1000
Stressed	73	200	0.267399	Microglia_MO_MCI3	syn12514624 DLPFC	273
Pro-inflammatory	14	41	0.254545	GSM5550501	GSE183068 PFC	55
DAM	10	30	0.25	GSM5106101	GSE167494 PFC	40
TAM	185	570	0.245033	GSM5550503	GSE183068 PFC	755
DAM	24	74	0.244898	Microglia_MO_MCI3	syn12514624 DLPFC	98
CRM	10	32	0.238095	GSM5550451	GSE183068 PFC	42
Homeostatic	50	172	0.225225	GSM5550501	GSE183068 PFC	222
Homeostatic	37	136	0.213873	GSM5550451	GSE183068 PFC	173
CAM	9	34	0.209302	GSM5292854	GSE174367 PFC	43
Homeostatic	49	257	0.160131	GSM5550491	GSE183068 PFC	306
Pro-inflammatory	7	37	0.159091	GSM5550451	GSE183068 PFC	44
Homeostatic	47	255	0.155629	GSM5550495	GSE183068 PFC	302
Pro-inflammatory	15	83	0.153061	GSM4886758	GSE106936 EC/SSC	98
Homeostatic	22	125	0.14966	GSM5106101	GSE167494 PFC	147
Stressed	14	80	0.148936	Microglia_MO_AD71	syn12514624 DLPFC	94
DAM	25	143	0.14881	GSM4886761	GSE106936 EC/SSC	168
Homeostatic	72	413	0.148454	GSM4886761	GSE106936 EC/SSC	485
CAM	6	38	0.136364	GSM5550503	GSE183068 PFC	44
CAM	5	33	0.131579	pPDsHSrSNxi3887	GSE178265 SN	38
Homeostatic	9	61	0.128571	GSM5292856	GSE174367 PFC	70
Pro-inflammatory	6	41	0.12766	GSM5550491	GSE183068 PFC	47
Pro-inflammatory	28	199	0.123348	GSM4886761	GSE106936 EC/SSC	227
Homeostatic	3	24	0.111111	191114_PN_325_snRNA-F8	GSE174332 PFC	27
Pro-inflammatory	10	86	0.104167	pPDsHSrSNxi2569	GSE178265 SN	96
Pro-inflammatory	21	183	0.102941	pPDsHSrSNxi1963	GSE178265 SN	204
Homeostatic	15	133	0.101351	GSM5292844	GSE174367 PFC	148
DAM	5	45	0.1	pPDsHSrSNxi2569	GSE178265 SN	50
Homeostatic	43	390	0.0993072	GSM5292843	GSE174367 PFC	433
DAM	18	178	0.0918367	GSM4886760	GSE106936 EC/SSC	196
CRM	3	30	0.0909091	GSM5550491	GSE183068 PFC	33
Homeostatic	43	436	0.0897704	Microglia_MO_AD71	syn12514624 DLPFC	479
Pro-inflammatory	39	402	0.0884354	GSM5550503	GSE183068 PFC	441
Homeostatic	3	31	0.0882353	191113_FTLD_222_snRNA-E1	GSE174332 PFC	34
Homeostatic	44	477	0.084453	pPDsHSrSNxi1963	GSE178265 SN	521
DAM	6	67	0.0821918	Microglia_MO_AD71	syn12514624 DLPFC	73
Pro-inflammatory	31	348	0.0817942	GSM4886760	GSE106936 EC/SSC	379
Pro-inflammatory	7	79	0.0813953	GSM5550495	GSE183068 PFC	86
Pro-inflammatory	10	115	0.08	pPDsHSrSNxi3298	GSE178265 SN	125
Pro-inflammatory	32	461	0.0649087	pPDsHSrSNxi3887	GSE178265 SN	493
Homeostatic	17	247	0.0643939	pPDsHSrSNxi2569	GSE178265 SN	264
CRM	25	364	0.0642674	RM66	GSE137444 TC	389
DAM	3	52	0.0545455	pPDsHSrSNxi1963	GSE178265 SN	55
Homeostatic	24	425	0.0534521	GSM4886760	GSE106936 EC/SSC	449
DAM	12	215	0.0528634	pPDsHSrSNxi4775	GSE178265 SN	227
Homeostatic	18	329	0.0518732	pPDsHSrSNxi3298	GSE178265 SN	347
Homeostatic	10	193	0.0492611	GSM4886758	GSE106936 EC/SSC	203
Homeostatic	11	215	0.0486726	GSM5550490	GSE183068 PFC	226
IRM	24	485	0.0471513	RM66	GSE137444 TC	509
DAM	2	41	0.0465116	SN_Donor8OTC	GSE148822 OTC/OC	43
Homeostatic	2	41	0.0465116	191112_ALS_126_snRNA-A6	GSE174332 PFC	43
Pro-inflammatory	3	63	0.0454545	GSM5550502	GSE183068 PFC	66
Homeostatic	30	643	0.0445765	pPDCN4340	GSE178265 SN	673
Homeostatic	12	258	0.0444444	SN_Donor8OC	GSE148822 OTC/OC	270
Homeostatic	3	65	0.0441176	191113_FTLD_228_snRNA-E5	GSE174332 PFC	68
Pro-inflammatory	15	328	0.0437318	pPDsHSrSNxi4775	GSE178265 SN	343
Homeostatic	85	1875	0.0433673	RM66	GSE137444 TC	1960
DAM	2	45	0.0425532	pPDsHSrSNxi3298	GSE178265 SN	47
Pro-inflammatory	4	90	0.0425532	GSM5550480	GSE183068 PFC	94
DAM	11	249	0.0423077	GSM4886754	GSE106936 EC/SSC	260
Pro-inflammatory	2	46	0.0416667	GSM5550489	GSE183068 PFC	48
Pro-inflammatory	8	185	0.0414508	pPDCN4340	GSE178265 SN	193
CAM	3	73	0.0394737	RM66	GSE137444 TC	76
Homeostatic	4	100	0.0384615	GSM5292852	GSE174367 PFC	104
Pro-inflammatory	5	126	0.0381679	pPDsHSrSNxi4568	GSE178265 SN	131
Homeostatic	4	101	0.0380952	SN_Donor11OTC	GSE148822 OTC/OC	105
Homeostatic	14	362	0.037234	GSM5292842	GSE174367 PFC	376
Homeostatic	6	156	0.037037	SN_Donor8OTC	GSE148822 OTC/OC	162
Homeostatic	2	52	0.037037	191113_FTLD_218_snRNA-H4	GSE174332 PFC	54
Homeostatic	7	183	0.0368421	GSM5550489	GSE183068 PFC	190
Homeostatic	12	315	0.0366972	GSM4886752	GSE106936 EC/SSC	327
DAM	2	53	0.0363636	GSM4886743	GSE106936 EC/SSC	55
Homeostatic	6	162	0.0357143	GSM5550476	GSE183068 PFC	168
CRM	2	54	0.0357143	GSM5550502	GSE183068 PFC	56
Pro-inflammatory	6	164	0.0352941	GSM4886755	GSE106936 EC/SSC	170
DAM	5	137	0.0352113	pPDsHSrSNxi3887	GSE178265 SN	142
Homeostatic	5	138	0.034965	GSM5106122	GSE167494 PFC	143
CRM	14	387	0.0349127	RM77	GSE137444 TC	401
Homeostatic	2	56	0.0344828	GSM5106106	GSE167494 PFC	58
DAM	1	28	0.0344828	GSM5106122	GSE167494 PFC	29
CRM	1	28	0.0344828	GSM5550489	GSE183068 PFC	29
Homeostatic	2	57	0.0338983	GSM5106100	GSE167494 PFC	59
Pro-inflammatory	2	58	0.0333333	GSM5550490	GSE183068 PFC	60
Pro-inflammatory	2	59	0.0327869	GSM5550488	GSE183068 PFC	61
CRM	3	89	0.0326087	GSM5550500	GSE183068 PFC	92
Pro-inflammatory	9	268	0.032491	GSM4886759	GSE106936 EC/SSC	277
Stressed	7	214	0.0316742	RM77	GSE137444 TC	221
Homeostatic	16	492	0.0314961	GSM4886746	GSE106936 EC/SSC	508
DAM	2	62	0.03125	pPDsHSrSNxi4568	GSE178265 SN	64
Homeostatic	39	1228	0.0307814	pPDsHSrSNxi4775	GSE178265 SN	1267
Homeostatic	12	381	0.0305344	pPDsHSrSNxi4568	GSE178265 SN	393
CAM	1	32	0.030303	pPDsHSrSNxi4775	GSE178265 SN	33
Pro-inflammatory	3	97	0.03	GSM5292844	GSE174367 PFC	100
Stressed	10	345	0.028169	RM66	GSE137444 TC	355
Pro-inflammatory	3	104	0.0280374	GSM4886746	GSE106936 EC/SSC	107
DAM	8	279	0.0278746	GSM4886744	GSE106936 EC/SSC	287
Homeostatic	6	210	0.0277778	GSM5550502	GSE183068 PFC	216
Pro-inflammatory	1	36	0.027027	GSM4886743	GSE106936 EC/SSC	37
CAM	1	37	0.0263158	GSM5292843	GSE174367 PFC	38
DAM	5	188	0.0259067	GSM4886759	GSE106936 EC/SSC	193
DAM	2	76	0.025641	GSM4886758	GSE106936 EC/SSC	78
CRM	1	38	0.025641	GSM5550488	GSE183068 PFC	39
Homeostatic	36	1379	0.0254417	GSM5550503	GSE183068 PFC	1415
Homeostatic	2	80	0.0243902	191113_FTLD_225_snRNA-H5	GSE174332 PFC	82
Homeostatic	12	507	0.0231214	GSM4886759	GSE106936 EC/SSC	519
Homeostatic	23	984	0.0228401	RM65	GSE137444 TC	1007
CRM	13	582	0.0218487	RM65	GSE137444 TC	595
DAM	1	45	0.0217391	SN_Donor11OC	GSE148822 OTC/OC	46
Homeostatic	14	635	0.0215716	RM77	GSE137444 TC	649
CRM	6	278	0.0211268	GSM5550503	GSE183068 PFC	284
Homeostatic	2	94	0.0208333	GSM5550454	GSE183068 PFC	96
Pro-inflammatory	3	144	0.0204082	pPDsHSrSNxi6173	GSE178265 SN	147
Pro-inflammatory	2	99	0.019802	GSM5550500	GSE183068 PFC	101
Homeostatic	13	663	0.0192308	GSM4886755	GSE106936 EC/SSC	676
Homeostatic	13	668	0.0190896	GSM4886762	GSE106936 EC/SSC	681
Cycling	1	53	0.0185185	GSM4886754	GSE106936 EC/SSC	54
DAM	3	162	0.0181818	GSM4886762	GSE106936 EC/SSC	165
DAM	1	55	0.0178571	191113_FTLD_225_snRNA-H5	GSE174332 PFC	56
IRM	2	111	0.0176991	RM77	GSE137444 TC	113
Homeostatic	3	167	0.0176471	SN_Donor11OC	GSE148822 OTC/OC	170
Homeostatic	8	453	0.0173536	GSM5550500	GSE183068 PFC	461
Pro-inflammatory	4	228	0.0172414	GSM4886754	GSE106936 EC/SSC	232
DAM	1	58	0.0169492	pPDsHSrSNxi6173	GSE178265 SN	59
Stressed	11	677	0.0159884	RM65	GSE137444 TC	688
DAM	1	62	0.015873	GSM4886752	GSE106936 EC/SSC	63
Homeostatic	5	314	0.015674	GSM4886743	GSE106936 EC/SSC	319
Pro-inflammatory	4	264	0.0149254	GSM4886762	GSE106936 EC/SSC	268
DAM	2	134	0.0147059	GSM4886746	GSE106936 EC/SSC	136
DAM	1	67	0.0147059	SN_Donor8OC	GSE148822 OTC/OC	68
Homeostatic	1	69	0.0142857	GSM5550494	GSE183068 PFC	70
DAM	1	71	0.0138889	pPDCN4340	GSE178265 SN	72
Homeostatic	6	429	0.0137931	pPDsHSrSNxi6173	GSE178265 SN	435
Homeostatic	3	219	0.0135135	GSM5550488	GSE183068 PFC	222
Homeostatic	3	222	0.0133333	pPDsHSrSNxi2142	GSE178265 SN	225
CRM	1	78	0.0126582	GSM5550480	GSE183068 PFC	79
Pro-inflammatory	1	80	0.0123457	GSM4886744	GSE106936 EC/SSC	81
DAM	2	172	0.0114943	GSM4886755	GSE106936 EC/SSC	174
Homeostatic	10	909	0.0108814	pPDsHSrSNxi3887	GSE178265 SN	919
Homeostatic	5	515	0.00961538	GSM4886754	GSE106936 EC/SSC	520
Pro-inflammatory	1	106	0.00934579	pPDsHSrSNxi2142	GSE178265 SN	107
Homeostatic	4	435	0.00911162	GSM4886744	GSE106936 EC/SSC	439
IRM	2	240	0.00826446	RM65	GSE137444 TC	242
DAM	1	120	0.00826446	pPDCN3839	GSE178265 SN	121
Homeostatic	1	289	0.00344828	GSM5550480	GSE183068 PFC	290
Homeostatic	1	488	0.00204499	pPDCN3839	GSE178265 SN	489
Cycling	0	53	0	GSM4886744	GSE106936 EC/SSC	53
Pro-inflammatory	0	41	0	GSM4886752	GSE106936 EC/SSC	41
CAM	0	66	0	RM65	GSE137444 TC	66
DAM	0	43	0	SN_Donor11OTC	GSE148822 OTC/OC	43
DAM	0	41	0	GSM5292843	GSE174367 PFC	41
Pro-inflammatory	0	28	0	GSM5292843	GSE174367 PFC	28
CAM	0	52	0	GSM5292844	GSE174367 PFC	52
DAM	0	62	0	GSM5292844	GSE174367 PFC	62
Homeostatic	0	188	0	GSM5292854	GSE174367 PFC	188
Pro-inflammatory	0	274	0	pPDCN3839	GSE178265 SN	274
CAM	0	30	0	pPDCN3839	GSE178265 SN	30
Cycling	0	44	0	pPDCN3839	GSE178265 SN	44
CAM	0	41	0	pPDCN4340	GSE178265 SN	41
CAM	0	26	0	pPDsHSrSNxi1963	GSE178265 SN	26
DAM	0	30	0	pPDsHSrSNxi2142	GSE178265 SN	30
Pro-inflammatory	0	30	0	GSM5550454	GSE183068 PFC	30
TAM	0	44	0	GSM5550488	GSE183068 PFC	44
DAM	0	63	0	GSM5550503	GSE183068 PFC	63
