# Supplementary material for: Mosaic loss of Chromosome Y in aged human microglia
Source: HighWire-hosted journal article supplement (doi:10.1101/gr.276409.121), 2022-08-30
Supplement: Supplemental_Table_S7.xlsx [file Supplemental_Table_S7.xlsx]

## Sheet: Description
Supplemental Table S7:
Information on the given tabs are found below
Summary of LOY estimates split by monocyte marker status						Monocyte_marker_LOY_summary
Summary of LOY estimates split by monocyte marker status, wide						Monocyte_marker_LOY_wide

## Sheet: Monocyte_marker_LOY_summary
	LOY percentages in cells with and without CCR2, VCAN, and FCN1
Dataset	CCR2+	CCR2-	VCAN+	VCAN-	FCN1+	FCN1-
syn12514624	NA	0.228208	NA	0.227731	NA	0.227153
GSE167494	NA	0.210131	0.222222	0.208984	NA	0.210179
GSE183068	0.1	0.0999881	0.176923	0.0962333	0.142857	0.0999163
GSE174332	NA	0.0385514	0.125	0.0359712	NA	0.0374269
GSE106936	0.128205	0.152975	0.124629	0.153703	0.108696	0.153064
GSE174367	NA	0.0629297	0.107143	0.0622652	NA	0.0629963
GSE148822	NA	0.0361446	0.0333333	0.036239	NA	0.0360777
GSE178265	0.02	0.0345499	0.0247934	0.0352744	0	0.034505
GSE137444	NA	0.031379	0	0.031379	0.037037	0.031332

## Sheet: Monocyte_marker_LOY_wide
	CCR2+			CCR2-			VCAN+			VCAN-			FCN1+			FCN1-
Cohort	LOY	NORMAL	LOY (%)	LOY	NORMAL	LOY (%)	LOY	NORMAL	LOY (%)	LOY	NORMAL	LOY (%)	LOY	NORMAL	LOY (%)	LOY	NORMAL	LOY (%)
syn12514624	0	3	0	521	1762	0.228208	2	5	0.285714	519	1760	0.227731	4	6	0.4	517	1759	0.227153
GSE148822	0	2	0	39	1040	0.0361446	2	58	0.0333333	37	984	0.036239	0	0	0	39	1042	0.0360777
GSE137444	0	6	0	228	7038	0.031379	0	16	0	228	7038	0.031379	1	26	0.037037	227	7018	0.031332
GSE106936	5	34	0.128205	1851	10249	0.152975	42	295	0.124629	1814	9988	0.153703	5	41	0.108696	1851	10242	0.153064
GSE178265	1	49	0.02	266	7433	0.0345499	15	590	0.0247934	252	6892	0.0352744	0	11	0	267	7471	0.034505
GSE174367	0	0		119	1772	0.0629297	3	25	0.107143	116	1747	0.0622652	0	2	0	119	1770	0.0629963
GSE174332	0	2	0	33	823	0.0385514	3	21	0.125	30	804	0.0359712	1	2	0.333333	32	823	0.0374269
GSE183068	1	9	0.1	837	7534	0.0999881	69	321	0.176923	769	7222	0.0962333	2	12	0.142857	836	7531	0.0999163
GSE167494	0	3	0	224	842	0.210131	10	35	0.222222	214	810	0.208984	1	7	0.125	223	838	0.210179
