# Supplementary material for: Mosaic loss of Chromosome Y in aged human microglia
Source: HighWire-hosted journal article supplement (doi:10.1101/gr.276409.121), 2022-08-30
Supplement: Supplemental_Table_S8.xlsx [file Supplemental_Table_S8.xlsx]

## Sheet: Description
Supplemental Table S8:
Information on the given tabs are found below
Table of gene sets used in the study	Microglia_gene_sets						Column name	Column descriptions	Ref.
							Stressed	Dissociation associated microglia gene set (stressed)	Thrupp et al. 2020
							SalaFrigerio_ARM	Gene signature of activated response microglia	Sala Frigerio et al. 2019
							SalaFrigerio_HM	Gene signature of homeostatic microglia	Sala Frigerio et al. 2019
							Prinz_CAM	Gene signature of CNS-associated macrophages	Prinz et al. 2021
							AGE_UP_MICROGLIA	Genes up in aged human microglia v young microglia (Bulk-RNAseq)	Galatro et al. 2017
							AGE_DOWN_MICROGLIA	Genes down in aged human microglia v young microglia (Bulk-RNAseq)	Galatro et al. 2017
							AD_traj_early	Homeostatic to AD microglia expression trajectory (early)	Gerritts et al. 2021
							AD_traj_conversion	Homeostatic to AD microglia expression trajectory (Conversion/middle)	Gerritts et al. 2021
							AD_traj_late	Homeostatic to AD microglia expression trajectory (late)	Gerritts et al. 2021
							AD_traj_early_end	Homeostatic to AD microglia expression trajectory (early end)	Gerritts et al. 2021
							HOMEO	Curated list of homeostatic microglia gene markers	This study
							DAM_UP_KRASEMANN_mouse	Upregulated disease associated microglia gene markers mouse	Krasemann et al. 2017
							DAM_DOWN_KRASEMANN_mouse	Downregulated disease associated microglia gene markers mouse	Krasemann et al. 2017
							HOMEOSTATIC_KRASEMANN_mouse	Homeostatic microglia gene markers mouse	Krasemann et al. 2017
							AD_Srinivasan_2021	AD gene set	Srinivasan et al. 2021
							HAM_UP_Srinivasan_2021	Genes up in human AD microglia	Srinivasan et al. 2021
							HAM_DOWN_Srinivasan_2021	Genes down in human AD microglia	Srinivasan et al. 2021
							KEGG_CELL_CYCLE	Cell cycle marker genes	Kegg
							KEGG_AD	Alzheimer's disease marker genes	Kegg
							MG_Markers	Microglia gene markers	Muller et al. 2017
							UP_IN_BLOOD_DERIVED_TAM	Genes upregulated in blood-derived TAM	Muller et al. 2017
							UP_IN_MICROGLIA_TAM	Genes upregulated in microglia	Muller et al. 2017
							UP_IN_BLOOD_DERIVED_MICROGLIA	Blood-derived microglia markers	Muller et al. 2017
							mLATE_VERMEULEN	Microglia LOY DE genes from this study.	This study

## Sheet: Microglia_gene_sets
Stressed_microglia	SalaFrigerio_HM	SalaFrigerio_ARM	Prinz_CAM	Cytokine_Response	AGE_UP_MICROGLIA	AGE_DOWN_MICROGLIA	AD_traj_early	AD_traj_conversion	AD_traj_late	AD_traj_early_end	HOMEO	DAM_UP_KRASEMANN_mouse	DAM_DOWN_KRASEMANN_mouse	HOMEOSTATIC_KRASEMANN_mouse	AD_Srinivasan_2021	HAM_UP_Srinivasan_2021	HAM_DOWN_Srinivasan_2021	KEGG_CELL_CYCLE	KEGG_AD	MG_Markers	UP_IN_BLOOD_DERIVED_TAM	UP_IN_MICROGLIA_TAM	UP_IN_BLOOD_DERIVED_MICROGLIA	mLATE_Vermeulen
RGS1	ABCA1	ACACA	CD163	IL1B	PRKCZ	MORN1	KBTBD12	BICC1	IKZF3	HTR7	SALL1	Apoe	Usp2	Egr1	PLCG2	LOC100507639	CECR2	ABL1	ADAM10	CCL4	CD163	CH25H	PLA2G7	CSF2RA
DUSP1	ABCA9	ACTR3B	LYVE1	IL1A	TNFRSF14	PDPN	HS3ST4	TRERF1	ALAS1	ZHX2	HEXB	Axl	Hexb	Plxdc2	ABI3	APOE	ANKRD26P3	ANAPC1	ADAM17	ADRB2	HLA-DQA1	ACY3	RGS1	ROBO1
HSPA1A	ABHD15	ADSS1	MRC1	IL6	RBP7	AGMAT	SETBP1	NAV2	PCLO	C11orf80	GPR34	Ccl2	Il21r	Hexb	INPP5D	SLC17A9	IGSF10	ANAPC10	APAF1	NAV3	FCGBP	DHRS9	KLRD1	CD99
HSPA1B	ADAP2	ANKH	SIGLEC1	IL1RAP	ASAP3	CROCC	TLE4	JAM2	PDGFB	MALAT1	CX3CR1	Tlr2	Itga6	Lair1	RIN3	FOXP1	H2BP1	ANAPC11	APBB1	ADORA3	PLTP	CCL3L1	CARD11	DHRSX
DDIT4	ADGRG1	ANXA2	STAB1	IL4I1	RUNX3	EPB41	BEND6	TMSB10	CDK6	MFHAS1	TMEM119	Spp1	Bin1	Mafb	CASS4	PTPRG	MOV10L1	ANAPC13	APH1A	SIGLEC8	TMEM176B	CCL3L3	ZC3H12D	PTPRM
SLC2A3	ADRB2	ANXA5	F13A1	CCL2	EPS15	ZBTB8B	PSMA1	A2M	SAMSN1	FNIP2	P2RY12	Cybb	Tgfbr2	Nfkb1	GPR141	ACD	GLT1D1	ANAPC2	APOE	SPRY1	PLAUR	P2RY12	CLEC9A	ST6GALNAC3
FOS	AKNA	APBB2		CCL3	HOOK1	DNALI1	LINC00578	GRID2	NIBAN1	PDE7B	MERTK	Msr1	Pla2g15	Tgfb1	CR1	TGFBI	SERPINF1	ANAPC4	APP	TAL1	MS4A6A	CCL3	MEFV	SLC25A6
JUN	ALOX5AP	APLP2		CCL4	NFIA	CAP1	P2RY12	KCNMB4	CDKN1A	FRMD4B	PROS1	Itgax	Rgmb	Itga6	PICALM	PSTPIP1	TLN2	ANAPC5	ATF6	RHOB	HLA-DQB1	RPS4Y1	NET1	PARD3B
HIF1A-AS3	ARHGAP27	APOE		CCL4L2	PGM1	DHCR24	STAMBPL1	CA8	TGFBR1	RASGEF1B	CSF1R	Clec7a	Plxdc2	Il10rb	CD2AP	PLXNC1	NIN	ANAPC7	ATP2A1	BIN1	IFITM3	CCL4L1	PMAIP1	KCNIP1
H2AC6	ARHGAP4	ARHGAP24		CXCL8	GNG12	LRRC7	ST6GAL1		EGR3	FARP1	P2RY13	Arg1	Csf1r	Tgfbr2	IL1RAP	GAS2L1	PTPRZ1	ATM	ATP2A2	SALL1	MS4A4A	EGR2	GYPC	SNTB1
H2BC5	ASB2	ARHGAP26		NFKBID	GBP2	NEGR1	RUNX1		PDPN	PPM1H	MARCKS	Siglec1	Mef2a	Il10ra	MEF2C	VENTX	MEIS1	ATR	ATP2A3	KLF2	IFITM2	TSC22D3	CWC25	DSCAM
H2BC8	BANK1	ATF3			GBP5	CNN3	BIN1		PADI2	TRAF3	SELPLG	Cfp	Cmklr1	Pde3b	ABCA7	IL15	ZBTB8B	BUB1	ATP5F1A	BHLHE41	IFI30	CCL4	NCOA7	APOE
H2BC21	BIN1	ATP6V0D2			PTPN22	PLPPR4	ATF7IP2		PFKP	MAP3K9		Alcam	Rap1gds1	Golm1	ZYX	A1BG	ZNF662	BUB1B	ATP5F1B	SLC1A3	NAMPT	SYNDIG1	MTSS1	MMRN1
RGS2	BIN2	AXL			SEMA4A	KCNA2	LHFPL2		INHBA	HIP1		Myof	Nuak1	Lrrc3	PTK2B	FAM109A	SELENBP1	BUB3	ATP5F1C	P2RY12	CPVL	PDK4	MTHFR	TMEM176B
RHOB	BMP2K	B2M			AIM2	CD53	LINC01094		EPS8	IER5L		Lilrb4	Hpgds	Il21r	BIN1	ARSA	RIMS2	CCNA1	ATP5F1D		TYMP	DDX3Y	TEP1	APBA2
H2BC11	C15orf39	BAIAP2L2			LINC01344	OLFML3	IRF8		ARHGAP6	GADD45B		Gpx3	F11r	Csf1r	PILRA	STEAP3	ZNF532	CCNA2	ATP5F1E		TGFBI	SLC44A2	PILRB	IL3RA
TEX14	C1orf162	BHLHE40			ATP2B4	PHGDH	SFMBT2		SLC1A3	NEAT1		Gas7	Gpr34	Atp8a2	SORL1	TTYH3	TNFRSF21	CCNB1	ATP5MC1		PPA1	RIN2	PRKCH	CACNA1D
UBC	C4orf19	C3AR1			SOX13	C1orf54	ZFP36L1		HDAC9	UGCG		Ccrl2	Abcc3	Kctd12	MS4A6A	SMIM3	ASTN1	CCNB2	ATP5MC1P5		BCL2A1	CX3CR1	PDGFC	AKAP17A
HSP90AA1	CALM2	CADM1			CHML	PI4KB	PLPP1		NFKBIZ	NLN		Cxcl16	Basp1	Rap1gds1	TREM2	S100A4	PDCD6IPP2	CCNB3	ATP5MC2		HLA-DRB1	CCL4L2	GAB3	PAQR5
JUNB	CCR5	CAPG			TDRD15	SELENBP1	XACT		PEBP4	NHSL1		Cxcr4	Cst3	Nuak1	CD33	RFX2	GRIA2	CCND1	ATP5MC3		SMIM3	EGR1	ATP8B4	GRID2
H2AC19	CD164	CCL4			KDM3A	DENND4B	CD226		RELB	RALA		Gpnmb	Lair1	Pla2g15	HLA-DRB1	ZNF843		CCND2	ATP5PB		SOCS3	HNRNPH1	ALPK1	RORA
H1-2	CD33	CD274			SULT1C4	IL6R	DIPK1A		ARHGAP42	RGS13		Lgals3	St3gal6	Abcc3	SPI1	FBRSL1		CCND3	ATP5PD		LMNA	IPCEF1	RASGRP4	ST6GAL1
BTG1	CEP68	CD34			CXCR4	MEX3A	SYNDIG1		PADI1	UNC13B		Csf1	Ckb	Cmklr1	APOE	GYPC		CCNE1	ATP5PF		TMEM176A	EGR3	ADAMTSL4	CDC42BPA
BTG2	CHD9	CD48			TEX41	CCT3	GAREM1		STEAP1B	FAM110B		Lag3	Cxxc5	Pald1	FERMT2	MTRNR2L1		CCNE2	ATP5PO		F13A1	FOS	TFEC	SLC22A23
DUSP5	CKB	CD63			GPR155	ADAMTS4	CLEC17A		CD69	MCUB			Golm1	Inpp4b	CLU	EMP2		CCNH	BACE1		FCGR3A	BHLHE41	FAS	MIR3667HG
	CLK1	CD72			PPP1R1C	ILDR2	NCK2		IRAK2	SDC2			Abi3	Tgfbr1		PPP1R14D		CDC14A	BACE2		HLA-DRB5	RGS1	CCDC125	CALCRL-AS1
	CMTM6	CD74			ZNF804A	BRINP2	VSIG4		MYOZ2	GAS2L3			Pde3b	Hpgds		CTBP1-AS		CDC14B	BAD		DUSP2	C12orf75	ST8SIA4	PLCXD3
	CMTM7	CD83			SPATS2L	RASAL2	SPTLC3		TMEM154	TMEM51			Cx3cr1	Arhgap5		ADAM8		CDC16	BID		PLIN2	ITGAX	TLR5	GRAMD4
	COL27A1	CD9			PPIL3	C1orf21	LINC02100		HEG1	SQSTM1			Scamp5	Nrip1		LSR		CDC20	CACNA1C		HLA-DPB1	JUN	OSBPL3	WIPF3
	COMMD8	CH25H			NRP2	RNPEP	CALCR		ENPP1	PRKCE			Slco2b1	Nr3c1		USP49		CDC23	CACNA1D		LDHA	PLA2G7	RUNX2	SHROOM3
	CRYBB1	COX6A2			PTH2R	BROX	FKBP5		UST	MITF			Pmepa1	Mef2a		SECTM1		CDC25A	CACNA1F		OLFML2B	KLF6	CCL22	DOCK1
	CSF1R	CPQ			CYP27A1	PARP1	MCPH1		EDN1	MAFB			Il10ra	Rgmb		CHCHD5		CDC25B	CACNA1S		C1orf162	IL6ST	JAK2	CPNE8
	CSMD3	CREG1			OBSL1	GPR137B	FOXO1		CH25H	SAMD4A			Nr3c1	Crybb1		RHPN2		CDC25C	CALM1		PTPN1	KLF2	MAP4K1	IGF1
	CTC1	CRLF2			B3GNT7	TRIM58	PLCL1		MORC1	LINC02432			Gtf2h2	Slc2a5		TIMM8B		CDC26	CALM2		RNASE2	RHOB	FEM1C	TPRG1
	CTTNBP2NL	CSF1			ARL4C	ADAM17	SRGAP3		IPCEF1	MX2			Rab3il1	P2ry12		TM9SF1		CDC27	CALM3		TAGLN2	SELPLG	LRRC8C	FOXP1
	CX3CR1	CSF2RA			THRB	E2F6	GMDS-DT		ABCB4	GLUL			Lrrc3	Adgrg1		CBX6		CDC45	CALML3		TNFSF13	SPP1	APH1B	APOC1
	CYTH4	CSTB			ZNF660	GAREM2	LIPE-AS1		SDK1	LITAF			Sall1	Tmem119		ZNF703		CDC6	CALML5		LITAF	CCL2	CD40	S100Z
	DAPP1	CTSA			PARP3	EMILIN1	GNG2		GLCCI1	SGK1			Inpp4b	P2ry13		CLDN15		CDC7	CALML6		GPR84	SPRY1	CTDSP1	IPCEF1
	DDX5	CTSB			FRMD4B	NRXN1	MAP2K6		KCNQ3	ANK2			Nrip1	Fscn1		ATOH8		CDK1	CAPN1		FABP5	ADGRG1	IRS2	ADAM28
	DIP2B	CTSS			FOXP1	MEIS1	NCKAP5		ARHGAP20	MSR1			Nfkb1	Ccr5		LCK		CDK2	CAPN2		HLA-DRA	RTTN	PLEKHM1	RBFOX2
	DOCK10	CTSZ			LINC00506	PLEK	PID1		LIPG	RAB7B			Atp8a2	Ckb		ADAMTS13		CDK4	CASP3		ATP1B3	TSC22D2	RGS18	XACT
	DOCK4	CXCL16			ABI3BP	CTNNA2	MAMDC2		CACNA1A	NAMPT			Mafb	Ltc4s		ULK3		CDK6	CASP7		CTSH	LOC284454	MYOF	ENSG00000249738
	DOCK8	DGKZ			CHST13	CRACDL	TMED8		RTTN	LINC01605			Olfml3	Gpr34		ZNF696		CDK7	CASP8		RBPJ	LPL	MRTFA	MT-CO3
	DOK3	DKK2			TXNRD3	LONRF2	AUTS2		SOCS6	SUSD1			Arhgap5	Olfml3		RUNX3		CDKN1A	CASP9		DPYD	ADRB2	GSN	IQGAP2
	DUSP6	DNAJB14			B3GALNT1	GPR17	TCF7L2		ADAMTS17	DPYD			Ltc4s	Slco2b1		TSHZ3		CDKN1B	CDK5		THBD	SLC1A3	ISY1	CA8
	DUSP7	DPP7			NAALADL2	KIF5C	ZBTB16		DSCAM	HPCAL1			Tgfbr1	Jun		SMAD7		CDKN1C	CDK5R1		RAB20	SOCS6	SERPINB9	ABCA1
	EEF2K	EFR3B			MIR3137	CACNB4	SSBP2		PRKCSH	NR4A3			Cttnbp2nl	Rhob		DPYD		CDKN2A	CHP1		HAMP	IFNGR1	EVI2B	FCHO2
	ELMO1	EGLN3			ADGRA3	TANC1	CSGALNACT1		GUCY1A1	RAB42P1			Fgd2	St3gal6		KCNJ5		CDKN2B	CHP2		HIF1A	CLEC9A	SIRPB1	HS3ST4
	ENG	EGR2			CCDC149	FIGN	DEPTOR		PRKCB	CDCP1			Ophn1	Cst3		SLC38A7		CDKN2C	COX4I1		SERPINA1	FGD2	RBMS1	CYFIP1
	ENTPD1	ENO1			RBPJ	DHRS9	CCDC146		RPLP2	RASGRP3			Tmem119	Abi3				CDKN2D	COX4I2		SLC31A2	FCGR1BP	VPS37B	RTN1
	EPB41L2	EPHX1			ARAP2	ZNF385B	PRTFDC1		WDPCP	DGKH			P2ry13	Cxxc5				CHEK1	COX5A		HLA-DMB	SHTN1	ESYT1	NHSL1
	F11R	FABP5			TEC	NCKAP1	SLC22A23		MAPK8	CD9			Fscn1	Rab3il1				CHEK2	COX5B		RNF144B	SEMA6D	DEPTOR	FAM149A
	FAM102B	FAM20C			CFI	TFPI	AMN1		NPL	ASAP1			Ccr5	Basp1				CREBBP	COX6A1		GALC	MALAT1	CCR1	KCNQ3
	FAM110A	FAU			TNIP3	MFSD6	PELI2		TSHZ3	HIF1A			Mertk	Ophn1				CUL1	COX6A2		GSTO1	SRGAP2	SIK1	ALPK3
	FCHSD2	FGR			LINC01091	CTLA4	H2BC8		PPP1R14C	BCAT1			Kctd12	Usp2				DBF4	COX6B1		ACSL1	HK2	PMVK	PGBD5
	FGD2	FLT1			IL15	ADAM23	ARHGAP24		HIVEP1	C5AR1			Tjp1	Cx3cr1				E2F1	COX6B2		GNG10	DOCK8	DCK	MCF2L
	FRMD4A	GAS2L3			GYPE	MAP2	NOS1AP		LIPA	SIPA1L1			Adgrg1	Pmepa1				E2F2	COX6C		CREM	CKB	PDE8A	FRMD4A
	FRMD4B	GCNT2			CYP4V2	ATG4B	MEF2C-AS1		PLA2G7	BCL2A1			Slc2a5	Sall1				E2F3	COX6CP3		HLA-DPA1	PLVAP	TINF2	LINC01605
	FSCN1	GOT1			GCNT4	CHL1	BCAS3		TMEM144	CEMIP2			P2ry12	Gtf2h2				E2F4	COX7A1		HLA-F	HNRNPA1P10	COQ10B	MT-CO2
	GLUL	GPI			MCTP1	CAMK1	APBA1		FOS	ALPK3			Crybb1	F11r				E2F5	COX7A2		LGALS3BP	SFMBT2	NUP98	SLC9A9
	GNA15	GPNMB			SPATA9	TADA3	ASTN1		TMEM117	SLC11A1			Rhob	Scamp5				EP300	COX7A2L		MSR1	GAL3ST4	SPTY2D1	CGNL1
	GOLM1	GPR65			RHOBTB3	PRRT3	ACP3		ELL2	ALCAM			Jun	Tjp1				ESPL1	COX7B		PDE4B	DDIT3	AOAH	GTPBP6
	GP9	GUSB			TGFBI	ATP2B2	ACTA2		GAS7	PTPRG			Egr1	Fgd2				FZR1	COX7B2		XIST	APLP2	CXCL16	SAT1
	GPR34	HACD2			TMCO6	PPARG	OSBPL6		ARID5B	PPARG			Tgfb1	Bin1				GADD45A	COX7C		METRNL	RBM6	CD300C	LINC00106
	GRAP	HEXA			PCDHGA2	MOBP	NXN		XYLT1	FMNL2			il10rb					GADD45B	COX8A		GBP2	SORL1	NR4A2	FCGBP
	HERC2	HIF1A			PCDHGA4	MST1R	NECTIN3		CCL3L1	TFRC								GADD45G	COX8C		GUK1	GLDN	AP2A2	FAM110B
	HPGDS	HLA-DQB1			PCDHGB2	ALAS1	RFX3-DT		CCL4	ACER3								GSK3B	CYC1		RNF149	CD83	NFKBIE	CPED1
	IFNGR1	HPSE			PCDHGA5	CACNA1D	PLAGL1		GLDN	APOC1								HDAC1	CYCS		CALHM6	ARHGAP12	ARHGAP15	MYCBP2
	IL10RA	IFITM3			PCDHGB3	PRICKLE2	TIAM1		TWSG1	WIPF3								HDAC2	EIF2AK3		CD58	LYVE1	CYTIP	ASMTL
	IL16	IGF1			PCDHGA6	LRIG1	IGSF21		FTL	DUSP1								MAD1L1	ERN1		MGAT1		TIPARP	RALGAPA2
	IL6R	INF2			PCDHGA7	ARL6IP5	CNKSR3		FTH1	SRGN								MAD2L1	FADD		SELENOP		CDK2AP2	ITGB5
	IL7R	ITGAX			PCDHGB4	ROBO2	P3H2		STAT1	ALDH1A2								MAD2L2	FAS		HBEGF		UNC119	RHOH
	INPP4B	KCNJ2			PCDHGA8	MIR5682	KHDRBS3		CHSY3	RASSF3								MCM2	GAPDH		NPC2		ST3GAL1	ITGAL
	INPP5D	KIAA1217			NDST1	KALRN	CPED1		WARS1	FAM20C								MCM3	GNAQ		BHLHE40		NR4A3	SRSF7
	ITGA9	LDHA			DUSP22	PLSCR4	IKZF2		RAMP1	MTSS1								MCM4	GRIN1		TFRC		CYP27A1	LILRB4
	ITPRIPL1	LDLR			IRF4	MED12L	KLF12		ADGRE5	NEDD9								MCM5	GRIN2A		TPM4		BEX4	AFAP1
	IVNS1ABP	LGALS3			RNF144B	P2RY12	FOXP2		NFKB1	RGS1								MCM6	GRIN2B		ARHGAP18		PLXND1	ADGRD1
	KLF3	LGALS3BP			ZNF391	EIF5A2	SCLT1		OLR1	UBASH3B								MCM7	GRIN2C		MAFB		TNFAIP2	TGFBI
	LGMN	LPL			PPT2	GNB4	AIG1		CD83	CYP19A1								MDM2	GRIN2D		SIGLEC10		SELL	LYST
	LPAR6	LRPAP1			HLA-DMB	GAK	UBE3D		CCL3	FAM107B								MYC	GSK3B		HLA-DMA		SLC66A2	FOXP2
	LPCAT2	LY86			PTK7	PPP2R2C	ZNF608		LINC02898	MYO1E								ORC1	HSD17B10		VAMP8		MNDA	CCDC26
	LPCAT3	LY9			VEGFA	AFAP1	FSCN1		DENND2B	KLF6								ORC2	IDE		ENG		STK17B	RAMP1
	LRBA	MAMDC2			ENPP4	MIR572	KCNMB2-AS1		ZFP36	ZNF385B								ORC3	IL1B		SDCBP		SYTL3	SOX5
	LRRC3	MILR1			ADGRB3	TLR10	TANC1		CYTH3	MRTFB								ORC4	ITPR1		FILIP1L		MAPKAPK3	RGS16
	LST1	MYO1E			TPBG	CRACD	OXR1		PDGFA	GTF2IRD1								ORC5	ITPR2		ARID5B		CLEC4A	UTRN
	LTC4S	MYO5A			DDO	FSTL5	C12orf75		RGS16	STARD13								ORC6	ITPR3		PTGER4		ANXA11	ZNF710
	LYN	NCEH1			ADGRG6	CCT5	SYT6		IL4I1	NCAM1								PCNA	LPL		AMPD2		RELL1	TMEM71
	MAF	NDUFA1			ESR1	CDH12	CCDC26		NFKBID	PCSK5								PKMYT1	LRP1		PLEK		STOM	ARL4C
	MARCKS	NPC2			IGF2R	TARS1	CECR2		FLT1	TMEM255A								PLK1	MAPK1		ZBTB16		HPCAL1	NPAS3
	MED12L	NRP1			NFE2L3	PLPP1	RASGEF1C		SPP1	SYNE2								PRKDC	MAPK3		HLA-A		PRDM1	PLEKHG1
	MEF2A	P2RX4			GPR141	RGS7BP	NEDD4L		IFNLR1	KIF13A								PTTG1	MAPT		RNASE6		CXCR4	PCNX2
	MFAP3	PEA15			NME8	CD180	LIPC		MGLL	CNGA1								PTTG2	MME		ZNF267		RIN3	ESRRG
	MGAT4A	PKM			GSAP	CMYA5	LINC02232		SH3RF1	LINC00278								RAD21	MT-ATP6		DSE		CSF2RB	ZFYVE28
	MPI	PLAUR			CLEC5A	MEF2C	WNT2B		BCL6	PIR								RB1	MT-ATP8		FPR3		MALT1	SESTD1
	MTSS1	PLD3			SMARCD3	LIX1	RASSF8		SCIN	MDFIC								RBL1	MT-CO1		FOSL2		DNASE1L1	BMPR1A
	MTUS1	PLEK			SCML1	ACSL6	HIVEP3		PLEK	MYO1D								RBL2	MT-CO2		MTHFD2		MS4A7	SRGAP3
	NAV2	PLEKHH2			SLC9A7	MEIKIN	AMOT		PDE3B	CORO2A								RBX1	MT-CO3		TMEM70		PQLC3	CECR2
	NFAM1	PLEKHM2			CACNA1F	HSPA4	ENTPD1-AS1		PDGFC	SLC22A15								SFN	MT-CYB		NAPSB		ARG2	CEP112
	NRIP1	PTCHD1			NXF3	VDAC1	MMRN1		IMMP2L	ALOX15B								SKP1	NAE1		PGAM1		FXYD5	CACNB4
	NTPCR	RAB7B			PNMA6A	ARAP3	USP53		PEAK1	SLCO3A1								SKP1P2	NCSTN				PIM1	MT-ND3
	NUMB	RAMP1			CLIC2	FGF1	MIR222HG		HRH1	TNS1								SKP2	NDUFA1				PLBD1	ABCC4
	OLFML3	RFTN1			DOCK5	PPP2R2B	ST6GALNAC3		ZEB2	SLC16A10								SMAD2	NDUFA10				SYNGR2	CACNB2
	OPHN1	RPL10A			FBXO16	JAKMIP2	SH3RF3		PDK4	LINC01193								SMAD3	NDUFA2				GPR132	ATP8B4
	P2RY12	RPL19			DDHD2	CPLX2	SLC2A5		H1-2	DNAJC5B								SMAD4	NDUFA3				CYTH1	LRRC39
	P2RY13	RPL23			TRPS1	PDLIM7	BACH1		FOXO3	LGALS3								SMC1A	NDUFA4				CYBB	CD226
	PAG1	RPL32			TMEM65	ZNF454	ZEB1		NR3C2	IQGAP2								SMC1B	NDUFA4L2				DOK3	CABLES1
	PDE3B	RPL41			TMEM71	RASGEF1C	TNFRSF10D		TBL1X	SALL4								SMC3	NDUFA5				PLAC8	FOSL2
	PDLIM4	RPLP1			LINC01591	GFPT2	KIF26B		CMPK2	CDK14								STAG1	NDUFA6				IL10	RTTN
	PICALM	RPS14			FAM189A2	H1-1	CACNA1D		IL21R	HS3ST3A1								STAG2	NDUFA7				VOPP1	C3
	PLD1	RPS16			UGCG	C2	WWOX		FHIT	CD44								TFDP1	NDUFA8				TREM1	MBNL1
	PLD4	RPS20			MEGF9	CFB	ITPR1		LINC02899	SLC38A6								TFDP2	NDUFA9				CIITA	RPS6KA3
	PLOD1	RPS5			PBX3	GLO1	NAALADL2		SHISAL2A	ZNF385D								TGFB1	NDUFAB1				CIB1	RECK
	PLXNA4	RTCB			CRACR2B	TREML4	KTN1-AS1		HIF1A-AS2	ABLIM3								TGFB2	NDUFB1				TMEM123	WDFY4
	PMEPA1	SCPEP1			RIC3	PRPH2	FNBP1L		MB21D2	MACC1								TGFB3	NDUFB10				NFIL3	SCMH1
	PRKAB1	SERPINE2			SPON1	CNPY3	S100Z		SYTL3	NCEH1								TP53	NDUFB2				SPINT2	MT-ND4
	PRKCA	SLC11A1			ACCS	PEX6	LINC02008		ADGRE2	CR1								TTK	NDUFB3				SAMHD1	SAMD4A
	PTAFR	SLC16A3			MIR4688	MEA1	ERC2		FCGBP	FAM20A								WEE1	NDUFB4				PTPN7	TNFRSF21
	PTGS1	SLC2A1			MS4A6A	MLIP	TMEM163		SLC2A13	HTRA4								WEE2	NDUFB5				LYZ	AKT3
	QKI	SLC2A6			MS4A4A	RIMS1	PSTPIP2		PANX1	CLMN								YWHAB	NDUFB6				S100A11	CXCR4
	RAB3IL1	SOAT1			VWCE	BVES	SMIM35		BCL2	HS3ST2								YWHAE	NDUFB7				EMB	SDK1
	RBM39	SPP1			AHNAK	SNX3	NEXMIF		SLC7A5	GALNTL6								YWHAG	NDUFB8				SH3BGRL	LINC00470
	RGS10	ST14			LTBP3	SOGA3	ELOVL6		CYTOR	SDS								YWHAH	NDUFB9				CYRIA	MT-CO1
	RGS2	ST8SIA6			TBC1D10C	IFNGR1	TTC28		EEPD1	JAML								YWHAQ	NDUFC1				IL1RN	PTPRE
	RHOB	SULF2			FAM168A	IPCEF1	SGSM1		TNFAIP8L3	LINC01010								YWHAZ	NDUFC2				MXD1	PLAUR
	RNASE4	TLR2			DISC1FP1	CNKSR3	LYVE1		SLC7A1	CYP27A1								ZBTB17	NDUFS1				FGR	ZFYVE9
	ROGDI	TNFSF8			MIR100HG	CYTH3	TSPAN5		SLC2A3	LINC02026									NDUFS2				GPR65	DDB2
	RPS6KA1	TPD52			ROBO4	IGF2BP3	TPK1		MICAL2	GNG12-AS1									NDUFS3				CREM	CTSL
	RSRP1	TREM2			ADAMTS15	HECW1	HDAC2-AS2		PVT1	CFAP418-AS1									NDUFS4				KYNU	NCKAP5
	RTN4RL1	TSPO			NRP1	STK17A	ZFP36L2		RNF24	TDRD9									NDUFS5				HLA-DMB	HTRA1
	SALL1	TTYH2			DEPP1	PGAM2	LINC00958		CGNL1	PLXNC1									NDUFS6				TNFSF13	STRBP
	SCAMP2	TYROBP			TMEM26	VSTM2A	PDE4D		ONECUT2	LINC00698									NDUFS7				BHLHE40	KBTBD12
	SCAMP5				FAM241B	LAT2	IGF1			CCDC170									NDUFS8				FPR3	CARD11
	SCOC				PPP1R3C	CLIP2	IL15RA			HISLA									NDUFV1				ITGA4	SLC25A29
	SELPLG				LZTS2	GTF2I	MACROD2			SELENOP									NDUFV2				PDE4B	B2M
	SEMA4B				CALHM2	SEMA3C	SPATA6			ZNF704									NDUFV3				IQGAP1	LINC00578
	SERINC3				SH3PXD2A	STEAP1	PRKCA			TXK									NOS1				METRNL	MRC1
	SERPINF1				DOCK1	ARPC1A	TMEM131L			FBXL17									PLCB1				IFITM2	LITAF
	SESN1				VENTX	ARPC1B	CX3CR1			LINC00639									PLCB2				THBD	TMEM163
	SH2B3				CD163	TAF6	TENM4			IL1R2									PLCB3				PLTP	PAK1
	SLC16A6				CLEC2B	CNPY4	HAMP			FAM151B									PLCB4				FOSL2	DYSF
	SLC1A3				CPNE8	TRAPPC14	ANKRD22			DPP4									PPP3CA				CD93	EML1
	SLC29A3				GALNT6	STAG3	EXT1			CHIT1									PPP3CB				DSE	HEG1
	SLC2A5				SLC4A8	SRRT	ITGA9			RNF144B									PPP3CC				CD74	GPR183
	SLC40A1				TAC3	TES	CYSLTR1			GTDC1									PPP3R1				HLA-DRB5	DLEU7-AS1
	SLC7A8				AGAP2	MIR4767	LINC01684			NHS									PPP3R2				TGFBI	MAMDC2
	SLCO2B1				PLXNC1	RBM10	PROCR			TENT5A									PSEN1				MS4A6A	MEIS1
	SLCO4A1				STARD13	ARAF	HCG22			KYNU									PSEN2				HLA-DQA1	ABCG1
	SNN				SNAPC1	TSR2	RHOH			EFCAB2									PSENEN					APBB1IP
	SOGA1				PLEKHG3	GCNA	C4orf19			CPVL									RYR3					MT-CYB
	SON				ADAM21	PLP1	PIP5K1B			PBX3									SDHA					NPC1
	SPARC				HEATR4	PAK3	PRDM11			NRP1									SDHB					IRS2
	SRGAP2				LTBP2	RHOXF1	LINC02057			PAPSS2									SDHC					PDE4DIP
	SRSF5				CCDC85C	PDZD4	ADGRB3			TRPS1									SDHD					ZNF804A
	SSH2				TNFAIP2	GDI1	LMO7			RPS6KA2									SNCA					NDST1
	STAB1				PATL2	DLC1	CC2D2B			BNC2									TNF					MT-ND1
	SUSD3				EWSAT1	FGL1	XKR6			HIBADH									TNFRSF1A					ARAP2
	TAB2				UACA	PSD3	PTCHD4			EDA									UQCR10					MT-ND2
	TANC2				PSTPIP1	CCAR2	ZDHHC14			ABCA1									UQCR10P1					PSD3
	TCF7L2				IQGAP1	RHOBTB2	RNF150			SUPT3H									UQCR11					TBC1D14
	TGFBR1				CRTC3	NEFL	RORA-AS1			CDR2									UQCRB					A2M
	TJP1				LINC00923	TCIM	MRC1			CEBPD									UQCRC1					RSRP1
	TMEM119				TMEM204	SNTG1	LINC01091			TCEAL5									UQCRC2					DOCK3
	TMEM173				TFAP4	LAPTM4B	SRGAP1			HERC5									UQCRFS1					CYRIB
	TPST2				EMP2	ERICH5	SRBD1			RSAD2									UQCRH					FKBP5
	TSPAN18				TVP23A	RIMS2	IRS2			MGMT									UQCRHL					SGPL1
	TXNIP				SULT1A1	DPYS	NEK10			RAD51B									UQCRQ					MS4A4E
	UNC93B1				MT1X	LY6K	PCBP3			FOXP1														NFE2L2
	UPK1B				CES3	DOCK8-AS1	PLXNA2			IFIT3														ALOX5
	WASF2				CDH3	PTPRD	GRK5			SERPINE1														P2RY8
	ZFHX3				PMFBP1	SH3GL2	SLC8A1			MTCL1														SLC43A2
	ZFP69				P2RX1	FAM166B	LINC00996			EMP2														ZFPM2-AS1
					ACAP1	TLN1	CYTL1			DNAH14														MTSS1
					NLGN2	PSAT1	C12orf42			SLC25A43														SLIT2
					ALOX15B	NTRK2	TMEM236			SPATA7														CEBPB
					USP43	LPAR1	CACNB4			IGF1R														SND1
					SARM1	MIGA2	CDH23			KLF7														GLCCI1
					MYO1D	ASS1	PELI1			TEC														ZMYM2
					GAS2L2	QRFP	FAM117B			AGAP1														IL15
					HOXB2	PLPP7	NCMAP			NRP2														CACNA1A
					HOXB7	OLFM1	GNAI1			EVA1C														MTUS1
					GPRC5C	CAMSAP1	RFTN1			IQCK														SLC44A2
					ST6GALNAC2	GPSM1	TNFRSF21			ME1														HCK
					BAHCC1	RASSF10	BANK1			KCNMA1														PAX8-AS1
					DSCAS	PRRG4	ICA1			LINC01500														PFKP
					TCF4	KIAA1549L	CPA6			ERN1														PEBP4
					ZNF334	SLC1A2	HPSE			SLC2A9														ABCC6
					SLC2A10	CHST1	XBP1P1			CXCR4														KIF1B
					PTK6	ACP2	SMAD6			EPHB1														ZMAT3
					NFIX	MADD	STYXL2			SULT1C4														GNG7
					CPAMD8	EFEMP2	ADGRG5			FHAD1														SCIN
					SLC5A5	PPP1CA	PLAC8			EML6														USP6NL
					CERS1	IL18BP	NCF1			CHI3L2														PDE9A
					DMKN	INPPL1	SP140			FMN1														ZNF331
					CEACAM1	ARHGEF17	FIRRE			SAT1
					KCNN4	CCDC89	STK32B			FPR3
					FPR3	FAT3	KIRREL3			CD163
					A1BG	ETS1	MIR646HG			MAMLD1
					A1BG-AS1	CACNB2	CD14			ISM1
					GGT1	APBB1IP	PTPN14			LTBP2
					APOL3	FAM13C	SERPINB9			ARHGAP10
					MIR3667HG	ZSWIM8	NEB			ANXA2
					MT-ATP8	LIPA	IL1RAP			COLEC12
					MT-ATP6	PRLHR	CAMK2D			CPM
					MT-ND4	RGS10	TWIST2			ZNF438
						HTRA1	CCNH			FGD5
						LPAR5	ZNRF1			TBC1D2
						LINC00987	TMED3			BICD1
						KLRD1	IER2			ITGA4
						LINC00477	SCFD2			FAM135B
						PDZRN4	LIMK2			MCTP1
						SHMT2	S100A8			DUSP10
						KIF5A	KCNIP1			KCNE1
						TBK1	IL1B			ST18
						NAP1L1	ST8SIA4			SNTB1
						GPN3	DOCK4			PCAT1
						RPH3A	HK2			TRHDE
						RBM19	KCNK13			TGFBI
						HSPB8	H1-4			EMILIN2
						RILPL1	H1-3			DOCK5
						TMEM132B	TFDP2			ABCC3
						SLC15A4	H1-10			GNG12
						TEX30	TRIM72			MIR3667HG
						MCF2L	H2AC6			LDLRAD3
						KLHL33	GAB1			NUPR1
						ACIN1	DAAM1			CDYL2
						IRF9	IER3			GPNMB
						SPTB	CXADR			EYA2
						EVL	GPAT3			DIRC3
						CKB	SLC35F3			SIGLEC1
						APBA2	DLGAP2			ITGAD
						MAP1A	DSE			PTPN22
						SCG3	SLC4A8			AKAP6
						FAM81A	SIGLEC12			GASK1B-AS1
						TLN2	TMEM71			SORCS1
						PARP16	LINC02328			PPM1L
						PAQR5	AFF3			SDCBP
						SEMA7A	HESX1			PPP1R15A
						CSK	AKAP7			P2RY8
						TLNRD1	GALNT7			GALM
						ALPK3	ABHD3			DANT2
						MIR6766	CPEB4			FGGY
						HBA2	P4HA1			ITSN1
						HBA1	DAB2IP			LINC00607
						MSLN	PCED1B			SH3PXD2A
						TELO2	DYSF			PLAU
						SNHG19	CENPP			PGBD5
						GLYR1	ATG7			ZNF804A
						ATF7IP2				ADAMTS2
						TMC7				CADM1
						CORO1A				LGMN
						ITGAL				SEL1L3
						GNAO1				FOSL2
						CBFB				ESR1
						E2F4				PDE4B
						EDC4				RAB27A
						SLC12A4				DOCK1
						CHTF8				SNX10
						AARS1				ZBP1
						IST1				TANC2
						CNTNAP4				SPATS2L
						COTL1				JUN
						JPH3				IL15
						ABR				TP63
						SERPINF1				ADGRD1
						PFN1				ANOS1
						CAMTA2				MX1
						DLG4				IFI44L
						UTP6				LINC01504
						LASP1				EPSTI1
						IKZF3				ACSL1
						ORMDL3				ATF3
						HDAC5				LONRF3
						SLC4A1				ADARB1
						PNPO				DGKI
						CCDC182				RGCC
						MRC2				ID2
						MILR1				OSM
						CACNG4				HS3ST3B1
						MIR1250				LPL
						HGS				TPRG1
						SIRT7				CPQ
						LPIN2				SLC9A7
						TMEM200C				LUCAT1
						ME2				ARHGAP18
						ZCCHC2				HS2ST1
						CDH19				GK
						RTTN				AGPAT4
						GPCPD1				PTPRM
						NAA20				GCNT1
						CCM2L				ASTN2
						KCNB1				MAN1A1
						BCAS1				PRR5L
						GNAS				GFOD1
						PTBP1				MELTF
						CFD				BASP1
						ARID3A				MAML2
						FAM174C				ANKH
						DOT1L				CLIC4
						DPP9				PLAUR
						KHSRP				RAB20
						STXBP2				CLEC5A
						ICAM3				MIR4435-2HG
						TYK2				PGM1
						KANK2				TXNIP
						GET3				THRB
						NACC1				MS4A4E
						ADGRE5				F13A1
						PKN1				PRKN
						CLEC17A				MT-ND4
						RASAL3				MERTK
						CYP4F11				MT-CYB
						PLVAP				RGL1
						COLGALT1
						MAST3
						UPF1
						ZNF536
						PSMD8
						SIRT2
						FBXO17
						PINLYP
						VASP
						SELENOW
						FUT1
						FTL
						TRPM4
						PIH1D1
						ALDH16A1
						RCN3
						NAPSB
						LILRA4
						U2AF2
						ZIM2
						ZNF586
						ZNF418
						CECR7
						CECR2
						NEFH
						SLC16A8
						NFAM1
						MLC1
						MOV10L1
						SHANK3
						SAMSN1
						APP
						LINC00649
						DSCAM
						FTCD
